# Supplementary material for: Biosynthesis of a bacterial meroterpenoid reveals a non-canonical class II meroterpenoid cyclase
Source: Royal Society of Chemistry journal article supplement (doi:10.1039/d4sc06010e), 2024-11-15
Supplement: d4sc06010e1.pdf [file d4sc06010e1.pdf]

## **Biosynthesis of a bacterial meroterpenoid reveals a non-canonical class II meroterpenoid cyclase**

Zengyuan Wang,<sup>a</sup> Tyler A. Alsup,<sup>b</sup> Xingming Pan,<sup>a</sup> Lu-Lu Li,<sup>a</sup> Jupeng Tian,<sup>a</sup> Ziyi Yang,<sup>a</sup> Xiaoxu Lin,<sup>a</sup> Hui-Min Xu,<sup>c</sup> Jeffrey D. Rudolf,<sup>b</sup> and Liao-Bin Dong<sup>\*,a</sup>

<sup>a</sup>State Key Laboratory of Natural Medicines, School of Traditional Chinese Pharmacy, China Pharmaceutical University, Nanjing 211198, China

<sup>b</sup>Department of Chemistry, University of Florida, Gainesville, Florida 32611, United States

<sup>c</sup>The Public Laboratory Platform, China Pharmaceutical University, Nanjing 211198, China

Corresponding to: ldong@cpu.edu.cn (L.-B. D.)

This PDF file includes:

Supplementary Experimental Procedures

Supplementary Tables S1 to S23

Supplementary Figures S1 to S134

## Table of Contents

### Experimental procedures:

General experimental procedures.  
Culture conditions.  
Gene cloning and plasmid construction.  
Heterologous expression, extraction, and LC-MS analysis.  
Isolation of atolypene A, C and D (**1–3**) from the *S. albus* DLW1011 overexpressing *atoABCDEF*.  
Isolation of **4** and **5** from the *S. albus* DLW1005 overexpressing *atoCF*.  
Isolation of **6–10** from the *S. albus* DLW1008 overexpressing *atoCDF*.  
Isolation of atolypene E–G (**11–13**) from the *S. lividans* DLW1012 overexpressing *atoCDEF*.  
Synthesis of Mosher esters of **9**.  
Synthesis of Mosher esters of **10**.  
Chemical synthesis of **10a**.  
X-ray crystallographic analysis of **2** and **12**.  
Expression of AtoE and AtoE-mutants in *Streptomyces* and purification.  
Expression and purification of AtoA.  
Expression and purification of AtoB and selected class II MTCs.  
In vitro enzymatic assay of AtoA.  
In vitro enzymatic assay of AtoB.  
In vitro enzymatic assay of AtoE, AtoE-mutants, and selected class II MTCs.  
Bioinformatics analysis.

### Supplementary tables:

**Table S1.** Predicted gene functions and blast results of *ato* BGC.  
**Table S2.** Strains used in this study.  
**Table S3.** Plasmids used in this study.  
**Table S4.** Primers used in this study.  
**Table S5.** Summary of <sup>1</sup>H NMR (400 MHz) and <sup>13</sup>C NMR (100 MHz) data for atolypene C (**2**) in methanol-*d*<sub>4</sub> ( $\delta$  in ppm, *J* in Hz).  
**Table S6.** Summary of <sup>1</sup>H NMR (400 MHz) and <sup>13</sup>C NMR (100 MHz) data for atolypene D (**3**) in methanol-*d*<sub>4</sub> ( $\delta$  in ppm, *J* in Hz).  
**Table S7.** Summary of <sup>1</sup>H NMR (400 MHz) and <sup>13</sup>C NMR (100 MHz) data for **4** in methanol-*d*<sub>4</sub> ( $\delta$  in ppm, *J* in Hz).  
**Table S8.** Summary of <sup>1</sup>H NMR (400 MHz) and <sup>13</sup>C NMR (100 MHz) data for **5** in methanol-*d*<sub>4</sub> ( $\delta$  in ppm, *J* in Hz).  
**Table S9.** Summary of <sup>1</sup>H NMR (400 MHz) and <sup>13</sup>C NMR (100 MHz) data for **6** in methanol-*d*<sub>4</sub> ( $\delta$  in ppm, *J* in Hz).  
**Table S10.** Summary of <sup>1</sup>H NMR (400 MHz) and <sup>13</sup>C NMR (100 MHz) data for **7** in methanol-*d*<sub>4</sub> ( $\delta$  in ppm, *J* in Hz).  
**Table S11.** Summary of <sup>1</sup>H NMR (400 MHz) and <sup>13</sup>C NMR (100 MHz) data for **8** in methanol-*d*<sub>4</sub> ( $\delta$  in ppm, *J* in Hz).  
**Table S12.** Summary of <sup>1</sup>H NMR (400 MHz) and <sup>13</sup>C NMR (100 MHz) data for **9** in methanol-*d*<sub>4</sub> ( $\delta$  in ppm, *J* in Hz).  
**Table S13.** Summary of <sup>1</sup>H NMR (400 MHz) and <sup>13</sup>C NMR (100 MHz) data for **10** in methanol-*d*<sub>4</sub> ( $\delta$  in ppm, *J* in Hz).  
**Table S14.** Summary of <sup>1</sup>H NMR (400 MHz) and <sup>13</sup>C NMR (100 MHz) data for **9a**, **9b**, and **9c** in methanol-*d*<sub>4</sub> ( $\delta$  in ppm, *J* in Hz).  
**Table S15.** Summary of <sup>1</sup>H NMR (400 MHz) and <sup>13</sup>C NMR (100 MHz) data for **10b**, **10c**, and **10d** in methanol-*d*<sub>4</sub> ( $\delta$  in ppm, *J* in Hz).  
**Table S16.** Summary of <sup>1</sup>H NMR (400 MHz) and <sup>13</sup>C NMR (100 MHz) data for atolypene E (**11**) in methanol-*d*<sub>4</sub> ( $\delta$  in ppm, *J* in Hz).  
**Table S17.** Summary of <sup>1</sup>H NMR (400 MHz) and <sup>13</sup>C NMR (100 MHz) data for atolypene F (**12**) in methanol-*d*<sub>4</sub> ( $\delta$  in ppm, *J* in Hz).  
**Table S18.** Summary of <sup>1</sup>H NMR (400 MHz) and <sup>13</sup>C NMR (100 MHz) data for atolypene G (**13**) in methanol-*d*<sub>4</sub> ( $\delta$  in ppm, *J* in Hz).  
**Table S19.** Summary of <sup>1</sup>H NMR (400 MHz) and <sup>13</sup>C NMR (100 MHz) data for **14** in methanol-*d*<sub>4</sub> ( $\delta$  in ppm, *J* in Hz).  
**Table S20.** Summary of <sup>1</sup>H NMR (400 MHz) and <sup>13</sup>C NMR (100 MHz) data for **10e** in methanol-*d*<sub>4</sub> ( $\delta$  in ppm, *J* in Hz).  
**Table S21.** Summary of <sup>1</sup>H NMR (400 MHz) and <sup>13</sup>C NMR (100 MHz) data for **10a** in methanol-*d*<sub>4</sub> ( $\delta$  in ppm, *J* in Hz).  
**Table S22.** AtoE-like MTCs used for phylogenetic analysis.  
**Table S23.** Summary of <sup>1</sup>H NMR (400 MHz) and <sup>13</sup>C NMR (100 MHz) data for atolypene H (**15**) in methanol-*d*<sub>4</sub> ( $\delta$  in ppm, *J* in Hz).

### Supplementary figures:

**Figure S1.** Biosynthetic pathway of pyripyropene A.  
**Figure S2.** Schematic representation of the *ato* cluster and its homologous gene clusters and BLASTp comparisons of each gene product.  
**Figure S3.** Proposed biosynthetic pathways of brasilicardin A, phenalinolactone A, tiancilacone A, and longestin.  
**Figure S4.** Amino acid sequence alignment of bacterial noncanonical class II MTCs.  
**Figure S5.** Reconstitution of the *ato* gene cluster.  
**Figure S6.** Analysis of metabolites from engineered *Streptomyces* strains.  
**Figure S7.** <sup>1</sup>H NMR spectrum of atolypene A (**1**) in methanol-*d*<sub>4</sub> (400 MHz).  
**Figure S8.** <sup>13</sup>C NMR spectrum of atolypene A (**1**) in methanol-*d*<sub>4</sub> (100 MHz).  
**Figure S9.** <sup>1</sup>H NMR spectrum of atolypene C (**2**) in methanol-*d*<sub>4</sub> (100 MHz).  
**Figure S10.** <sup>13</sup>C NMR spectrum of atolypene C (**2**) in methanol-*d*<sub>4</sub> (100 MHz).  
**Figure S11.** DEPT spectrum of atolypene C (**2**) in methanol-*d*<sub>4</sub>.  
**Figure S12.** <sup>1</sup>H-<sup>1</sup>H COSY spectrum of atolypene C (**2**) in methanol-*d*<sub>4</sub>.  
**Figure S13.** HSQC spectrum of atolypene C (**2**) in methanol-*d*<sub>4</sub>.  
**Figure S14.** HMBC spectrum of atolypene C (**2**) in methanol-*d*<sub>4</sub>.  
**Figure S15.** ROESY spectrum of atolypene C (**2**) in methanol-*d*<sub>4</sub>.  
**Figure S16.** <sup>1</sup>H NMR spectrum of atolypene D (**3**) in methanol-*d*<sub>4</sub> (400 MHz).  
**Figure S17.** <sup>13</sup>C NMR spectrum of atolypene D (**3**) in methanol-*d*<sub>4</sub> (100 MHz).  
**Figure S18.** <sup>1</sup>H-<sup>1</sup>H COSY spectrum of atolypene D (**3**) in methanol-*d*<sub>4</sub>.  
**Figure S19.** HSQC spectrum of atolypene D (**3**) in methanol-*d*<sub>4</sub>.  
**Figure S20.** HMBC spectrum of atolypene D (**3**) in methanol-*d*<sub>4</sub>.  
**Figure S21.** ROESY spectrum of atolypene D (**3**) in methanol-*d*<sub>4</sub>.  
**Figure S22.** <sup>1</sup>H NMR spectrum of **4** in methanol-*d*<sub>4</sub> (400 MHz).  
**Figure S23.** <sup>13</sup>C NMR spectrum of **4** in methanol-*d*<sub>4</sub> (100 MHz).  
**Figure S24.** <sup>1</sup>H-<sup>1</sup>H COSY spectrum of **4** in methanol-*d*<sub>4</sub>.  
**Figure S25.** HSQC spectrum of **4** in methanol-*d*<sub>4</sub>.  
**Figure S26.** HMBC spectrum of **4** in methanol-*d*<sub>4</sub>.  
**Figure S27.** ROESY spectrum of **4** in methanol-*d*<sub>4</sub>.  
**Figure S28.** <sup>1</sup>H NMR spectrum of **5** in methanol-*d*<sub>4</sub> (400 MHz).  
**Figure S29.** <sup>13</sup>C NMR spectrum of **5** in methanol-*d*<sub>4</sub> (100 MHz).  
**Figure S30.** <sup>1</sup>H-<sup>1</sup>H COSY spectrum of **5** in methanol-*d*<sub>4</sub>.  
**Figure S31.** HSQC spectrum of **5** in methanol-*d*<sub>4</sub>.  
**Figure S32.** HMBC spectrum of **5** in methanol-*d*<sub>4</sub>.  
**Figure S33.** ROESY spectrum of **5** in methanol-*d*<sub>4</sub>.  
**Figure S34.** <sup>1</sup>H NMR spectrum of **6** in methanol-*d*<sub>4</sub> (400 MHz).  
**Figure S35.** <sup>13</sup>C NMR spectrum of **6** in methanol-*d*<sub>4</sub> (100 MHz).  
**Figure S36.** <sup>1</sup>H-<sup>1</sup>H COSY spectrum of **6** in methanol-*d*<sub>4</sub>.  
**Figure S37.** HSQC spectrum of **6** in methanol-*d*<sub>4</sub>.

**Figure S38.** HMBC spectrum of **6** in methanol- $d_4$ .  
**Figure S39.** ROESY spectrum of **6** in methanol- $d_4$ .  
**Figure S40.** Proposed biosynthetic pathway of atolypenes.  
**Figure S41.**  $^1\text{H}$  NMR spectrum of **7** in methanol- $d_4$  (400 MHz).  
**Figure S42.**  $^{13}\text{C}$  NMR spectrum of **7** in methanol- $d_4$  (100 MHz).  
**Figure S43.**  $^1\text{H}$ - $^1\text{H}$  COSY spectrum of **7** in methanol- $d_4$ .  
**Figure S44.** HSQC spectrum of **7** in methanol- $d_4$ .  
**Figure S45.** HMBC spectrum of **7** in methanol- $d_4$ .  
**Figure S46.** ROESY spectrum of **7** in methanol- $d_4$ .  
**Figure S47.**  $^1\text{H}$  NMR spectrum of **8** in methanol- $d_4$  (400 MHz).  
**Figure S48.**  $^{13}\text{C}$  NMR spectrum of **8** in methanol- $d_4$  (100 MHz).  
**Figure S49.**  $^1\text{H}$ - $^1\text{H}$  COSY spectrum of **8** in methanol- $d_4$ .  
**Figure S50.** HSQC spectrum of **8** in methanol- $d_4$ .  
**Figure S51.** HMBC spectrum of **8** in methanol- $d_4$ .  
**Figure S52.** ROESY spectrum of **8** in methanol- $d_4$ .  
**Figure S53.**  $^1\text{H}$  NMR spectrum of **9** in methanol- $d_4$  (400 MHz).  
**Figure S54.**  $^{13}\text{C}$  NMR spectrum of **9** in methanol- $d_4$  (100 MHz).  
**Figure S55.**  $^1\text{H}$ - $^1\text{H}$  COSY spectrum of **9** in methanol- $d_4$ .  
**Figure S56.** HSQC spectrum of **9** in methanol- $d_4$ .  
**Figure S57.** HMBC spectrum of **9** in methanol- $d_4$ .  
**Figure S58.** ROESY spectrum of **9** in methanol- $d_4$ .  
**Figure S59.**  $^1\text{H}$  NMR spectrum of **10** in methanol- $d_4$  (400 MHz).  
**Figure S60.**  $^{13}\text{C}$  NMR spectrum of **10** in methanol- $d_4$  (100 MHz).  
**Figure S61.**  $^1\text{H}$ - $^1\text{H}$  COSY spectrum of **10** in methanol- $d_4$ .  
**Figure S62.** HSQC spectrum of **10** in methanol- $d_4$ .  
**Figure S63.** HMBC spectrum of **10** in methanol- $d_4$ .  
**Figure S64.** ROESY spectrum of **10** in methanol- $d_4$ .  
**Figure S65.**  $^1\text{H}$  NMR spectrum of **9a** in methanol- $d_4$  (400 MHz).  
**Figure S66.**  $^{13}\text{C}$  NMR spectrum of **9a** in methanol- $d_4$  (100 MHz).  
**Figure S67.**  $^1\text{H}$  NMR spectrum of **10b** in methanol- $d_4$  (400 MHz).  
**Figure S68.**  $^{13}\text{C}$  NMR spectrum of **10b** in methanol- $d_4$  (100 MHz).  
**Figure S69.**  $^1\text{H}$  NMR spectrum of **9b** in methanol- $d_4$  (400 MHz).  
**Figure S70.**  $^{13}\text{C}$  NMR spectrum of **9b** in methanol- $d_4$  (100 MHz).  
**Figure S71.** HSQC spectrum of **9b** in methanol- $d_4$ .  
**Figure S72.**  $^1\text{H}$  NMR spectrum of **9c** in methanol- $d_4$  (400 MHz).  
**Figure S73.**  $^{13}\text{C}$  NMR spectrum of **9c** in methanol- $d_4$  (100 MHz).  
**Figure S74.** HSQC spectrum of **9c** in methanol- $d_4$ .  
**Figure S75.**  $^1\text{H}$  NMR spectrum of **10c** in methanol- $d_4$  (400 MHz).  
**Figure S76.**  $^{13}\text{C}$  NMR spectrum of **10c** in methanol- $d_4$  (100 MHz).  
**Figure S77.** HSQC spectrum of **10c** in methanol- $d_4$ .  
**Figure S78.**  $^1\text{H}$  NMR spectrum of **10d** in methanol- $d_4$  (400 MHz).  
**Figure S79.**  $^{13}\text{C}$  NMR spectrum of **10d** in methanol- $d_4$  (100 MHz).  
**Figure S80.** Absolute stereochemical determination at C3 of **9** and **10** using the modified Mosher method.  
**Figure S81.** HPLC analysis of metabolites from *S. lividans* DLW1012 harboring the four genes *atoCDEF*.  
**Figure S82.**  $^1\text{H}$  NMR spectrum of atolypene E (**11**) in methanol- $d_4$  (400 MHz).  
**Figure S83.**  $^{13}\text{C}$  NMR spectrum of atolypene E (**11**) in methanol- $d_4$  (100 MHz).  
**Figure S84.**  $^1\text{H}$ - $^1\text{H}$  COSY spectrum of atolypene E (**11**) in methanol- $d_4$ .  
**Figure S85.** HSQC spectrum of atolypene E (**11**) in methanol- $d_4$ .  
**Figure S86.** HMBC spectrum of atolypene E (**11**) in methanol- $d_4$ .  
**Figure S87.** ROESY spectrum of atolypene E (**11**) in methanol- $d_4$ .  
**Figure S88.**  $^1\text{H}$  NMR spectrum of atolypene F (**12**) in methanol- $d_4$  (400 MHz).  
**Figure S89.**  $^{13}\text{C}$  NMR spectrum of atolypene F (**12**) in methanol- $d_4$  (100 MHz).  
**Figure S90.**  $^1\text{H}$ - $^1\text{H}$  COSY spectrum of atolypene F (**12**) in methanol- $d_4$ .  
**Figure S91.** HSQC spectrum of atolypene F (**12**) in methanol- $d_4$ .  
**Figure S92.** HMBC spectrum of atolypene F (**12**) in methanol- $d_4$ .  
**Figure S93.** ROESY spectrum of atolypene F (**12**) in methanol- $d_4$ .  
**Figure S94.**  $^1\text{H}$  NMR spectrum of atolypene G (**13**) in methanol- $d_4$  (400 MHz).  
**Figure S95.**  $^{13}\text{C}$  NMR spectrum of atolypene G (**13**) in methanol- $d_4$  (100 MHz).  
**Figure S96.**  $^1\text{H}$ - $^1\text{H}$  COSY spectrum of atolypene G (**13**) in methanol- $d_4$ .  
**Figure S97.** HSQC spectrum of atolypene G (**13**) in methanol- $d_4$ .  
**Figure S98.** HMBC spectrum of atolypene G (**13**) in methanol- $d_4$ .  
**Figure S99.** ROESY spectrum of atolypene G (**13**) in methanol- $d_4$ .  
**Figure S100.** EIC analysis of wild-type *S. albus* that were supplemented with **11** and **12**, respectively.  
**Figure S101.** Protein purification of AtoA and AtoB.  
**Figure S102.** LC-MS analysis of the in vitro reactions of AtoA with **11** and **12**, respectively.  
**Figure S103.** LC-MS analysis of the in vitro reactions of AtoB with **6** and **14**.  
**Figure S104.**  $^1\text{H}$  NMR spectrum of **14** in methanol- $d_4$  (400 MHz).  
**Figure S105.**  $^{13}\text{C}$  NMR spectrum of **14** in methanol- $d_4$  (100 MHz).  
**Figure S106.**  $^1\text{H}$ - $^1\text{H}$  COSY spectrum of **14** in methanol- $d_4$ .  
**Figure S107.** HSQC spectrum of **14** in methanol- $d_4$ .  
**Figure S108.** HMBC spectrum of **14** in methanol- $d_4$ .  
**Figure S109.** ROESY spectrum of **14** in methanol- $d_4$ .  
**Figure S110.** Plasmid construction and protein purification of AtoE.  
**Figure S111.**  $^1\text{H}$  NMR spectrum of **10e** in methanol- $d_4$  (400 MHz).  
**Figure S112.**  $^{13}\text{C}$  NMR spectrum of **10e** in methanol- $d_4$  (100 MHz).  
**Figure S113.**  $^1\text{H}$  NMR spectrum of **10a** in methanol- $d_4$  (400 MHz).  
**Figure S114.**  $^{13}\text{C}$  NMR spectrum of **10a** in methanol- $d_4$  (100 MHz).  
**Figure S115.**  $^1\text{H}$ - $^1\text{H}$  COSY spectrum of **10a** in methanol- $d_4$ .  
**Figure S116.** HSQC spectrum of **10a** in methanol- $d_4$ .  
**Figure S117.** HMBC spectrum of **10a** in methanol- $d_4$ .  
**Figure S118.** ROESY spectrum of **10a** in methanol- $d_4$ .  
**Figure S119.** HPLC analysis of in vitro biochemical assay of AtoE with **10a** ( $\lambda_{\text{max}} = 210 \text{ nm}$ ).  
**Figure S120.** Structural model of AtoE with displaying key active site residues and a docking model of **10a**.  
**Figure S121.** Protein purification of AtoE mutants.  
**Figure S122.** In vitro reactions of AtoE variants with the substrate **10a**.  
**Figure S123.** LC-MS analysis of the in vitro reactions of AtoE and variants with **10a**.  
**Figure S124.** Protein purification of selected class II MTCs.  
**Figure S125.** HPLC profiles ( $\lambda_{\text{max}} = 210 \text{ nm}$ ) of the in vitro reactions of class II MTCs (UtaTC, SsyTC, SmaTC, SerTC, CcrTC, and AtoE) with **10a**.  
**Figure S126.** LC-MS analysis of the in vitro reactions of class II MTCs (UtaTC, SsyTC, SmaTC, SerTC, CcrTC, and AtoE) with **10a**.  
**Figure S127.** Proposed catalytic processes of the class II MTCs involving substrate **10a** to form **13** and **15**.

**Figure S128.**  $^1\text{H}$  NMR spectrum of atolypene H (**15**) in methanol- $d_4$  (400 MHz).  
**Figure S129.**  $^{13}\text{C}$  NMR spectrum of atolypene H (**15**) in methanol- $d_4$  (100 MHz).  
**Figure S130.**  $^1\text{H}$ - $^1\text{H}$  COSY spectrum of atolypene H (**15**) in methanol- $d_4$ .  
**Figure S131.** HSQC spectrum of atolypene H (**15**) in methanol- $d_4$ .  
**Figure S132.** HMBC spectrum of atolypene H (**15**) in methanol- $d_4$ .  
**Figure S133.** ROESY spectrum of atolypene H (**15**) in methanol- $d_4$ .  
**Figure S134.** Analysis of selected *ato*-like BGCs.



## Experimental Procedures

### General experimental procedures.

All  $^1\text{H}$ ,  $^{13}\text{C}$ , and 2D NMR ( $^1\text{H}$ - $^1\text{H}$  COSY, HSQC, HMBC, and ROESY) experiments were run on a Bruker AVANCE NEO at 400 MHz for  $^1\text{H}$  and 100 MHz for  $^{13}\text{C}$  nuclei. Chemical shifts ( $\delta$ ) were given in parts per million (ppm) with reference to the solvent signals and coupling constants were expressed in hertz (Hz). Preparative HPLC was carried out on an Agilent 1260 Prep Infinity LC with a VWD detector equipped with an Agilent Eclipse XDB-C18 column (250 mm  $\times$  21.2 mm, 7  $\mu\text{m}$ ). LC-MS was performed on an Agilent 1260 Infinity LC coupled to an MSD IQ equipped with an Agilent Poroshell 120 EC-C18 column (50 mm  $\times$  4.6 mm, 2.7  $\mu\text{m}$ ). Optical rotations were obtained using an AUTOPOL IV automatic polarimeter (Rudolph Research Analytical). HRESIMS data were obtained using an Agilent G6230 Q-TOF mass instrument. UV spectra were acquired in MeOH with a Shimadzu UV-2600i UV-VIS spectrophotometer. X-ray crystal data were collected using a Bruker D8 VENTURE diffractometer. Fractions were monitored by TLC and spots were visualized by heating silica gel plates sprayed with 10%  $\text{H}_2\text{SO}_4$  in EtOH. All of the solvents were analytically pure. Other chemicals, biochemical, and media components were purchased from standard commercial sources.

### Culture conditions.

*E. coli* strains harboring plasmids were grown in lysogeny broth (LB) with appropriate antibiotic selection. Wild-type (*Streptomyces albus* J1074, *Streptomyces lividans* SBT18 and *Amycolatopsis tolypomycina* NRRL B-24205) and recombinant actinomycete strains were cultured in solid MS medium. *E. coli*-*Streptomyces* conjugations were plated onto solid ISP4 medium supplemented with 20 mM  $\text{MgCl}_2$ . Fermentation of wild-type and recombinant actinomycete strains were conducted using fermentation medium of PTMM.<sup>[1-3]</sup> Briefly, fresh spores of actinomycete strains were inoculated into 250 mL baffled flasks containing 50 mL of Tryptone Soy Broth (TSB) sterile seed medium and cultivated for 2–3 days at 28 °C on a rotary shaker (230 rpm). After that, 4% (v/v) seed culture were transferred into 2.5 L baffled Erlenmeyer flasks filled with 500 mL of fermentation medium, and incubated at 28 °C and 230 rpm for 7 days.

MS medium: 20 g D-mannitol, 20 g soya flour, 3 g  $\text{CaCO}_3$ , and 20 g agar in 1 L of deionized water, pH 7.2.

ISP4 medium: 10 g starch soluble, 1 g  $\text{K}_2\text{HPO}_4$ , 1 g  $\text{MgSO}_4$ , 1 g NaCl, 2 g  $(\text{NH}_4)_2\text{SO}_4$ , 2 g  $\text{CaCO}_3$ , 1 mg  $\text{FeSO}_4$ , 1 mg  $\text{MnCl}_2$ , 1 mg  $\text{ZnSO}_4$ , and 20 g agar in 1 L of deionized water, pH 7.2.

PTMM medium: 40 g dextrin, 40 g lactose, 5 g yeast extract, 5 g MOPS, and 10 mL trace elements (40 mg  $\text{ZnCl}_2$ , 200 mg  $\text{FeCl}_3 \cdot 6\text{H}_2\text{O}$ , 10 mg  $\text{CuCl}_2$ , 10 mg  $\text{MnCl}_2 \cdot 4\text{H}_2\text{O}$ , 10 mg  $\text{Na}_2\text{B}_4\text{O}_7 \cdot 10\text{H}_2\text{O}$ , and 10 mg  $(\text{NH}_4)_6\text{Mo}_7\text{O}_{24} \cdot 4\text{H}_2\text{O}$  in 1 L of deionized water) in 1 L of deionized water, pH 7.3.

### Gene cloning and plasmid construction.

The sequences of synthetic promoters, ribosome binding sites (RBS), and terminators were designed based on a prior publication,<sup>[4]</sup> and were synthesized by General Biosystems (Anhui, China). Combinations of promoters and RBSs were organized to ensure that no additional sequences were present between promoter and RBS sequences (P12R10, P3R5, P9R7, and P10R10). The synthetic promoter-RBS parts and terminator parts (T2, T9, T4, and T10) were assembled onto the pRSFDuet-1 plasmid by General biosystems (Anhui, China), resulting in the construction of plasmids pRSFDuet-P12R10, pRSFDuet-P3R5, pRSFDuet-P9R7, and pRSFDuet-P10R10. Genomic DNA from *A. tolypomycina* was extracted according to the protocol of DC103 kit (Vazyme).

Each CDS (Coding sequence) in the *ato* gene cluster was amplified by polymerase chain reaction (PCR) from genomic DNA using the corresponding primers (Table S4). Genes *atoA*, *atoE*, and *atoF* were inserted into the *NdeI* restriction site within the pRSFDuet-P12R10 vector to construct plasmids pLDW1001, pLDW1002, and pLDW1003. Gene *atoB* was inserted into the *PstI* restriction site within the pRSFDuet-P9R7 vector to construct pLDW1004. Gene *atoC* was inserted into the *HindIII* restriction site within the pRSFDuet-P3R5 vector to afford pLDW1005. Subsequently, plasmid pLDW1006 was constructed by inserting gene *atoD* into the *AflII* restriction site of the pRSFDuet-P10R10 vector resulting in pRSFDuet-P10R10-*atoD*.

The PCR product P3R5-*atoC*-T9, cloned from pLDW1005, was inserted into the *EcoRV* and *BamHI* sites of pSET152 vector to generate pLDW1007. Subsequently, the PCR products P3R5-*atoC*-T9 and P10R10-*atoD*-T10 were cloned from pLDW1005 and pLDW1006, respectively, and inserted into the *EcoRV* and *BamHI* sites of pSET152 vector to afford pLDW1008. The PCR products of P3R5-*atoC*-T9 and P12R10-*atoE*-T2 were assembled into the linearized pSET152 vector, resulting in pLDW1009. The P3R5-*atoC*-T9 and P12R10-*atoF*-T2 fragments were cloned into the *EcoRV* and *BamHI* sites of pSET152 vector to create pLDW1010. The P3R5-*atoC*-T9, P10R10-*atoD*-T10, and P12R10-*atoE*-T2 fragments were assembled into the linearized pSET152 vector, resulting in pLDW1011. The P3R5-*atoC*-T9, P12R10-*atoE*-T2, and P12R10-*atoF*-T2 fragments were assembled into the linearized pSET152 vector, resulting in pLDW1012. The P3R5-*atoC*-T9, P10R10-*atoD*-T10, and P12R10-*atoF*-T2 fragments were assembled into the linearized pSET152 vector, resulting in pLDW1013. The P3R5-*atoC*-T9, P10R10-*atoD*-T10, P12R10-*atoE*-T2, and P12R10-*atoF*-T2 fragments were assembled into the linearized pSET152 vector, resulting in pLDW1014. The P9R7-*atoB*-T4, P3R5-*atoC*-T9, P10R10-*atoD*-T10, P12R10-*atoE*-T2, and P12R10-*atoF*-T2 fragments were assembled into the linearized pSET152 vector, resulting in pLDW1015. The P12R10-*atoA*-T2, P9R7-*atoB*-T4, P3R5-*atoC*-T9, P10R10-*atoD*-T10, P12R10-*atoE*-T2, and P12R10-*atoF*-T2 fragments were assembled into the linearized pSET152 vector, resulting in pLDW1016.

Genes *atoA*, *atoB*, *atoE*, and several class II meroterpenoid cyclase (MTC) genes (*SerTC*, *SmaTC*, *UtaTC*, *CcrTC*, *SsyTC*, *AxyTC*, and *PshTC*) were inserted into the *NdeI* and *XhoI* restriction sites within the pET-28a(+) vector, resulting in the construction of expression vectors pLDW1017–pLDW1019 and pLDW1021–pLDW1027.

### Heterologous expression, extraction, and LC-MS analysis.

Plasmids pLDW1007–pLDW1016 were individually transformed into *E. coli* ET12567/pUZ8002 and introduced into *S. albus* J1074 by intergeneric conjugation according to the standard methods.<sup>[5]</sup> Positive colonies were selected with 20  $\mu\text{g}/\text{mL}$  nalidixic acid and 50

$\mu\text{g/mL}$  apramycin after 5–7 days cultivation and subsequently identified through PCR with corresponding primers. Finally, recombinant strains were constructed and named *S. albus* DLW1002–DLW1011, respectively. Likewise, the recombinant plasmid pDLW1014 was transferred into *S. lividans* SBT18 in the same manner to obtain *S. lividans* DLW1012.

All recombinant *Streptomyces* strains were fermented in PTMM medium. The broth and mycelium were separated by centrifugation at 3750 rpm for 15 min. The broth was then extracted three times with ethyl acetate (EtOAc), while the mycelium was extracted with acetone. After removing the solvent, the residual solution was further extracted with EtOAc. The organic phase of broth and mycelium extracts were combined and evaporated. The resulting residues were dissolved in  $\text{CH}_3\text{OH}$  and filtered through a 0.22  $\mu\text{m}$  filter for subsequent LC-MS analysis. LC-MS analysis was performed using an 18 min solvent gradient (0.8 mL/min) from 10%–100%  $\text{CH}_3\text{CN}$  in  $\text{H}_2\text{O}$  containing 0.1% formic acid.

#### Isolation of atolypene A, C and D (1–3) from the *S.albus* DLW1011 overexpressing *atoABCDEF*.

The heterologous strain of *S. albus* DLW1011 harboring gens *atoABCDEF* was fermented on a 7.5-L large scale in PTMM medium. After a 7-day fermentation, the broth and mycelium were separated by centrifugation at 3750 rpm for 20 min. The broth was then extracted three times with EtOAc, while the mycelium was extracted with acetone. After removing the solvent, the residual mycelium solution was further extracted with EtOAc. The extracts from broth and mycelium were combined after concentration in vacuo. The crude extracts were then adsorbed onto C18 reverse-phase resin and fractionated by MPLC, eluting with a gradient of  $\text{CH}_3\text{OH-H}_2\text{O}$  (60:40–100:0) to give six fractions (Fr.01–Fr.06). Fr.02, which contained atolypene A (**1**), was further purified by reverse-phase preparative HPLC (65%  $\text{CH}_3\text{CN}$ , 17 mL/min) to yield 14 mg ( $t_{\text{R}}$  = 22 min; Figures S7 and S8). Fr.04 was purified by preparative HPLC eluted with 30–100%  $\text{CH}_3\text{CN}$  at a flow rate of 17 mL/min for 35 min, affording atolypene C (**2**) (9 mg;  $t_{\text{R}}$  = 25 min; Figures S9–S15) and atolypene D (**3**) (16 mg;  $t_{\text{R}}$  = 27 min; Figures S16–S21).

Atolypene A (**1**): white powder;  $^1\text{H}$  NMR (400 MHz,  $\text{CD}_3\text{OD}$ ):  $\delta_{\text{H}}$  5.73 (1H, m), 5.16 (1H, t,  $J$  = 6.6 Hz), 3.55 (1H, m), 2.53 (1H, m), 2.36 (1H, m), 2.30 (1H, m), 2.14 (1H, m), 2.12 (1H, m), 2.06 (1H, m), 2.24 (1H, m), 2.19 (1H, m), 1.98 (1H, m), 1.97 (1H, m), 1.95 (1H, m), 1.95 (1H, m), 1.94 (1H, m), 1.90 (1H, m), 1.79 (1H, m), 1.67 (1H, m), 1.65 (3H, s), 1.60 (1H, m), 1.59 (1H, m), 1.49 (1H, m), 1.47 (1H, m), 1.45 (1H, m), 1.34 (1H, m), 1.24 (3H, s), 1.21 (3H, s), 1.13 (1H, m), 1.03 (3H, s), 0.98 (3H, d,  $J$  = 7.1 Hz), 0.90 (3H, s) ppm.  $^{13}\text{C}$  NMR (100 MHz,  $\text{CD}_3\text{OD}$ ):  $\delta_{\text{C}}$  217.8, 174.6, 144.1, 139.2, 123.3, 122.4, 56.1, 51.6, 51.3, 45.7, 39.8, 39.0, 38.3, 37.2, 36.5, 33.9, 33.5, 32.7, 29.4, 26.5, 25.0, 24.8, 24.7, 23.3, 21.4, 16.6, 15.7, 14.9 ppm.

Atolypene C (**2**): white powder;  $[\alpha]_{\text{D}}^{20}$  +22.5 (c 0.12, MeOH); UV (MeOH)  $\lambda_{\text{max}}$  nm (log  $\epsilon$ ): 208 (2.6);  $^1\text{H}$  NMR (400 MHz) and  $^{13}\text{C}$  NMR (100 MHz) data ( $\text{CD}_3\text{OD}$ ), see **Table S5**; HRESIMS (negative mode)  $m/z$  484.3438  $[\text{M} - \text{H}]^-$  (calcd for  $\text{C}_{30}\text{H}_{46}\text{NO}_4^-$ , 484.3432).

Atolypene D (**3**): white powder;  $[\alpha]_{\text{D}}^{20}$  +6.0 (c 0.04, MeOH); UV (MeOH)  $\lambda_{\text{max}}$  nm (log  $\epsilon$ ): 206 (2.9);  $^1\text{H}$  NMR (400 MHz) and  $^{13}\text{C}$  NMR (100 MHz) data ( $\text{CD}_3\text{OD}$ ), see **Table S6**; HRESIMS (negative mode)  $m/z$  443.3169  $[\text{M} - \text{H}]^-$  (calcd for  $\text{C}_{28}\text{H}_{43}\text{O}_4^-$ , 443.3167).

#### Isolation of 4 and 5 from the *S.albus* DLW1005 overexpressing *atoCF*.

The heterologous strain of *S. albus* DLW1005, harboring gens *atoCF*, was fermented on a 10-L scale in PTMM medium. Following the procedure described above, the EtOAc fraction was adsorbed onto C18 reverse-phase resin and fractionated by MPLC, eluting with a gradient of  $\text{CH}_3\text{OH-H}_2\text{O}$  (50:50–100:0) to give four fractions (Fr.01–Fr.04). Fr.02 was subjected to silica gel CC and eluted with petroleum ether–EtOAc (10:1–5:1) to yield **4** (11 mg; Figures S22–S27) and **5** (7 mg; Figures S28–S33).

Compound **4**: colorless oil;  $[\alpha]_{\text{D}}^{20}$  +7.0 (c 0.01, MeOH); UV (MeOH)  $\lambda_{\text{max}}$  nm (log  $\epsilon$ ): 203 (1.7);  $^1\text{H}$  NMR (400 MHz) and  $^{13}\text{C}$  NMR (100 MHz) data ( $\text{CD}_3\text{OD}$ ), see **Table S7**; HRESIMS (negative mode)  $m/z$  405.3005  $[\text{M} - \text{H}]^-$  (calcd for  $\text{C}_{25}\text{H}_{41}\text{O}_4^-$ , 405.3010).

Compound **5**: colorless oil;  $[\alpha]_{\text{D}}^{20}$  +12.0 (c 0.03, MeOH); UV (MeOH)  $\lambda_{\text{max}}$  nm (log  $\epsilon$ ): 212 (2.8);  $^1\text{H}$  NMR (400 MHz) and  $^{13}\text{C}$  NMR (100 MHz) data ( $\text{CD}_3\text{OD}$ ), see **Table S8**; HRESIMS (negative mode)  $m/z$  415.3187  $[\text{M} + \text{Na}]^+$  (calcd for  $\text{C}_{25}\text{H}_{44}\text{NaO}_3^+$ , 415.3183).

#### Isolation of 6–10 from the *S.albus* DLW1008 overexpressing *atoCDF*.

The heterologous strain of *S. albus* DLW1008, harboring gens *atoCDF*, was fermented on a 40-L large scale in PTMM medium. Following the procedure described above, the crude extracts were adsorbed onto C18 reverse-phase resin and fractionated by MPLC, eluting with a gradient of  $\text{CH}_3\text{OH-H}_2\text{O}$  (40:60–100:0) to give five fractions (Fr.01–Fr.05). Fr.02 was purified by preparative HPLC that was eluted with 60%  $\text{CH}_3\text{CN}$  at the flow rate of 17 mL/min for 25 min to afford **6** (68 mg;  $t_{\text{R}}$  = 16 min; Figures S34–S39). Fr.03 was subjected to silica gel CC and eluted with petroleum ether–EtOAc (10:1–1:1) to yield **7** (5 mg; Figures S41–S46), **8** (221 mg; Figures S47–S52) and **9** (450 mg; Figures S53–S58). Fr. 04 was subjected to silica gel CC, eluting with petroleum ether–EtOAc (5:1), and further purified by preparative HPLC ( $\text{CH}_3\text{CN-H}_2\text{O}$ , 85:15) to yield **10** (330 mg;  $t_{\text{R}}$  = 20 min; Figures S59–S64).

Compound **6**: colorless oil;  $[\alpha]_{\text{D}}^{20}$  +8.0 (c 0.10, MeOH); UV (MeOH)  $\lambda_{\text{max}}$  nm (log  $\epsilon$ ): 210 (2.7);  $^1\text{H}$  NMR (400 MHz) and  $^{13}\text{C}$  NMR (100 MHz) data ( $\text{CD}_3\text{OD}$ ), see **Table S9**; HRESIMS (negative mode)  $m/z$  462.3580  $[\text{M} - \text{H}]^-$  (calcd for  $\text{C}_{28}\text{H}_{46}\text{NO}_4^-$ , 462.3589).

Compound **7**: colorless oil;  $[\alpha]_{\text{D}}^{20}$  +7.0 (c 0.03, MeOH); UV (MeOH)  $\lambda_{\text{max}}$  nm (log  $\epsilon$ ): 204 (2.1);  $^1\text{H}$  NMR (400 MHz) and  $^{13}\text{C}$  NMR (100 MHz) data ( $\text{CD}_3\text{OD}$ ), see **Table S10**; HRESIMS (negative mode)  $m/z$  504.3673  $[\text{M} - \text{H}]^-$  (calcd for  $\text{C}_{30}\text{H}_{50}\text{NO}_5^-$ , 504.3694).

Compound **8**: colorless oil;  $[\alpha]_{\text{D}}^{20}$  +5.9 (c 0.22, MeOH); UV (MeOH)  $\lambda_{\text{max}}$  nm (log  $\epsilon$ ): 205 (2.6);  $^1\text{H}$  NMR (400 MHz) and  $^{13}\text{C}$  NMR (100 MHz) data ( $\text{CD}_3\text{OD}$ ), see **Table S11**; HRESIMS (negative mode)  $m/z$  463.3425  $[\text{M} - \text{H}]^-$  (calcd for  $\text{C}_{28}\text{H}_{47}\text{O}_5^-$ , 463.3429).

Compound **9**: colorless oil;  $[\alpha]_{\text{D}}^{20}$  +35.0 (c 0.04, MeOH); UV (MeOH)  $\lambda_{\text{max}}$  nm (log  $\epsilon$ ): 213 (3.0);  $^1\text{H}$  NMR (400 MHz) and  $^{13}\text{C}$  NMR (100 MHz) data ( $\text{CD}_3\text{OD}$ ), see **Table S12**; HRESIMS (negative mode)  $m/z$  407.3161  $[\text{M} - \text{H}]^-$  (calcd for  $\text{C}_{25}\text{H}_{43}\text{O}_4^-$ , 407.3167).

Compound **10**: colorless oil;  $[\alpha]_{\text{D}}^{20}$  +15.0 (c 0.05, MeOH); UV (MeOH)  $\lambda_{\text{max}}$  nm (log  $\epsilon$ ): 212 (2.9);  $^1\text{H}$  NMR (400 MHz) and  $^{13}\text{C}$  NMR (100 MHz) data ( $\text{CD}_3\text{OD}$ ), see **Table S13**; HRESIMS (negative mode)  $m/z$  433.3313  $[\text{M} - \text{H}]^-$  (calcd for  $\text{C}_{27}\text{H}_{45}\text{O}_4^-$ , 433.3323).

### Isolation of atolypene E–G (11–13) from the *S. lividans* DLW1012 overexpressing *atoCDEF*.

The heterologous strain of *S. lividans* DLW1012, harboring gens *atoCDEF*, was fermented on a 7.5-L large scale in PTMM medium. Following the procedure described above, the crude extracts were adsorbed onto C18 reverse phase resin and fractionated by MPLC, eluting with a gradient of CH<sub>3</sub>OH–H<sub>2</sub>O (60:40–100:0) to give six fractions (Fr.01–Fr.06). Fr.02 was further purified by preparative HPLC eluted with 30–100% CH<sub>3</sub>CN at the flow rate of 17 mL/min for 25 min to afford atolypene E (**11**) (6 mg; *t<sub>R</sub>* = 15 min; Figures S82–S87). Fr.03 that contained atolypene F (**12**) was further purified by preparative HPLC (75% CH<sub>3</sub>CN, 17 mL/min) to yield 5 mg (*t<sub>R</sub>* = 22 min; Figures S88–S93). Fr.05 was subjected to silica gel CC and eluted with petroleum ether–EtOAc (5:1) to yield atolypene E (**13**) (15 mg; Figures S94–S99).

Atolypene E (**11**): white powder;  $[\alpha]_D^{20} +38.3$  (c 0.06, MeOH); UV (MeOH)  $\lambda_{\max}$  nm (log  $\epsilon$ ): 206 (2.6); <sup>1</sup>H NMR (400 MHz) and <sup>13</sup>C NMR (100 MHz) data (CD<sub>3</sub>OD), see **Table S16**; HRESIMS (negative mode) *m/z* 444.3492 [M – H]<sup>–</sup> (calcd for C<sub>28</sub>H<sub>46</sub>NO<sub>3</sub><sup>–</sup>, 444.3483).

Atolypene F (**12**): white powder;  $[\alpha]_D^{20} +45.0$  (c 0.06, MeOH); UV (MeOH)  $\lambda_{\max}$  nm (log  $\epsilon$ ): 207 (2.4); <sup>1</sup>H NMR (400 MHz) and <sup>13</sup>C NMR (100 MHz) data (CD<sub>3</sub>OD), see **Table S17**; HRESIMS (negative mode) *m/z* 486.3584 [M – H]<sup>–</sup> (calcd for C<sub>30</sub>H<sub>48</sub>NO<sub>4</sub><sup>–</sup>, 486.3589).

Atolypene G (**13**): colorless waxy solid;  $[\alpha]_D^{20} +54.6$  (c 0.03, MeOH); UV (MeOH)  $\lambda_{\max}$  nm (log  $\epsilon$ ): 209 (2.9); <sup>1</sup>H NMR (400 MHz) and <sup>13</sup>C NMR (100 MHz) data (CD<sub>3</sub>OD), see **Table S18**; HRESIMS (negative mode) *m/z* 415.3214 [M – H]<sup>–</sup> (calcd for C<sub>27</sub>H<sub>43</sub>O<sub>3</sub><sup>–</sup>, 415.3218).

### Synthesis of Mosher esters of 9.

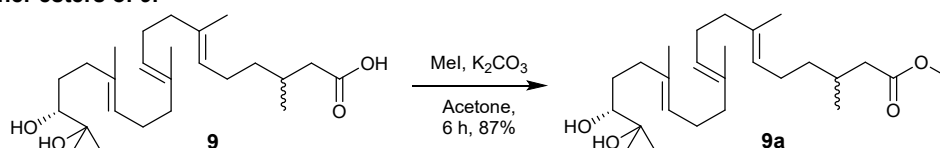

To a stirred solution of **9** (61.4 mg, 0.150 mmol) and K<sub>2</sub>CO<sub>3</sub> (104.0 mg, 0.750 mmol) in dry acetone (1 mL) was added MeI (93.4  $\mu$ L, 1.500 mmol). The reaction mixture was stirred at room temperature for 6 h. After removing of acetone under reduced pressure, the reaction mixture was extracted with EtOAc (3  $\times$  10 mL) and dried over anhydrous Na<sub>2</sub>SO<sub>4</sub>. The crude product was concentrated in vacuo and purified by silica gel CC, eluting with petroleum ether–EtOAc (4:1) to yield **9a** (55.0 mg; 87%; Figures S65 and S66).

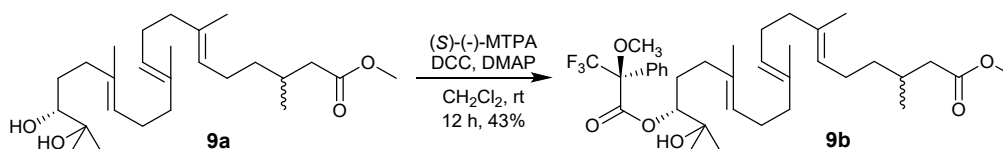

The synthesis of Mosher esters of compound **9a** was carried out using previously published methods.<sup>[6]</sup>

A mixture of **9a** (20.0 mg, 0.047 mmol), (S)-(-)-MTPA (44.0 mg, 0.188 mmol), DCC (39.0 mg, 0.189 mmol), and DMAP (17.0 mg, 0.139 mmol) was dissolved in anhydrous CH<sub>2</sub>Cl<sub>2</sub> (1 mL), which was stirred under N<sub>2</sub> at room temperature for 12 h. After concentration in vacuo, the crude product was subjected to silica gel CC and eluted with petroleum ether–EtOAc (10:1) to yield **9b** (13 mg; 43%; Figures S69–S71).

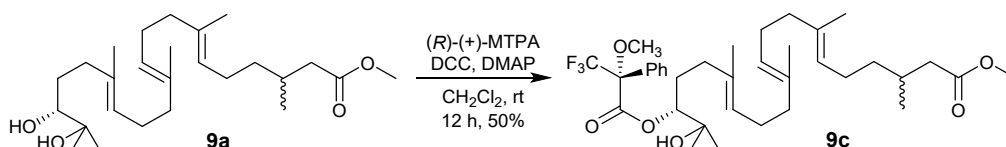

Consistent with the above process, a mixture of **9a** (25.0 mg, 0.059 mmol), (R)-(+)-MTPA (55.0 mg, 0.235 mmol), DCC (48.7 mg, 0.236 mmol), and DMAP (21.0 mg, 0.172 mmol) was dissolved in anhydrous CH<sub>2</sub>Cl<sub>2</sub> (1 mL), which was stirred under N<sub>2</sub> at room temperature for 12 h. After concentration in vacuo, the crude product was subjected to silica gel CC and eluted with petroleum ether–EtOAc (10:1) to yield **9c** (19 mg; 50%; Figures S72–S74).

Compound **9a**: colorless oil;  $[\alpha]_D^{20} +12.0$  (c 0.13, MeOH); UV (MeOH)  $\lambda_{\max}$  nm (log  $\epsilon$ ): 215 (3.1); <sup>1</sup>H NMR (400 MHz) and <sup>13</sup>C NMR (100 MHz) data (CD<sub>3</sub>OD), see **Table S14**; HRESIMS (positive mode) *m/z* 445.3275 [M + Na]<sup>+</sup> (calcd for C<sub>26</sub>H<sub>46</sub>NaO<sub>4</sub><sup>+</sup>, 445.3288).

Compound **9b**: colorless oil;  $[\alpha]_D^{20} -12.4$  (c 0.13, MeOH); UV (MeOH)  $\lambda_{\max}$  nm (log  $\epsilon$ ): 218 (3.4); <sup>1</sup>H NMR (400 MHz) and <sup>13</sup>C NMR (100 MHz) data (CD<sub>3</sub>OD), see **Table S14**; HRESIMS (positive mode) *m/z* 661.3680 [M + Na]<sup>+</sup> (calcd for C<sub>36</sub>H<sub>53</sub>F<sub>3</sub>NaO<sub>6</sub><sup>+</sup>, 661.3686).

Compound **9c**: colorless oil;  $[\alpha]_D^{20} +31.6$  (c 0.18, MeOH); UV (MeOH)  $\lambda_{\max}$  nm (log  $\epsilon$ ): 221 (3.6); <sup>1</sup>H NMR (400 MHz) and <sup>13</sup>C NMR (100 MHz) data (CD<sub>3</sub>OD), see **Table S14**; HRESIMS (positive mode) *m/z* 661.3679 [M + Na]<sup>+</sup> (calcd for C<sub>36</sub>H<sub>53</sub>F<sub>3</sub>NaO<sub>6</sub><sup>+</sup>, 661.3686).

### Synthesis of Mosher esters of 10.

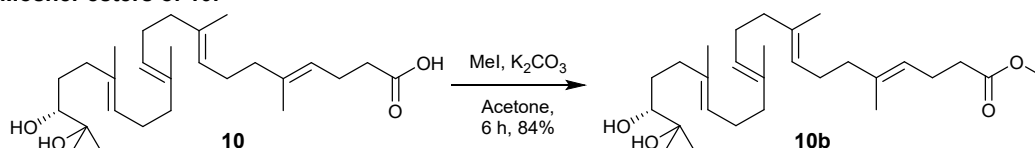

To a stirred solution of **10** (30 mg, 0.069 mmol) and K<sub>2</sub>CO<sub>3</sub> (47.8.0 mg, 0.346 mmol) in dry acetone (1 mL) was added MeI (22.0  $\mu$ L, 0.345 mmol). The reaction mixture was stirred at room temperature for 6 h. After removing of acetone under reduced pressure, the reaction mixture was extracted with EtOAc (3  $\times$  10 mL) and dried over anhydrous Na<sub>2</sub>SO<sub>4</sub>. The crude product was concentrated in vacuo and purified by silica gel CC, eluting with petroleum ether–EtOAc (5:1) to yield **10b** (26.0 mg; 84%; Figures S67 and S68).

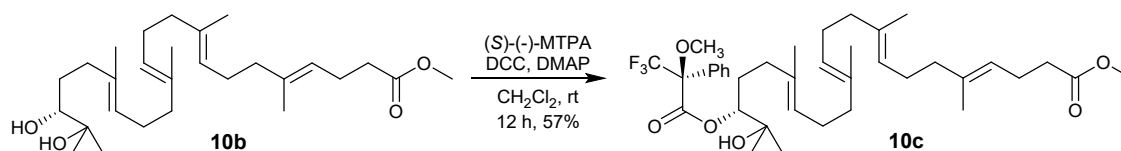

A mixture of **10b** (13.0 mg, 0.029 mmol), (*S*)-(-)-MTPA (13.0 mg, 0.029 mmol), DCC (24.0 mg, 0.117 mmol), and DMAP (15.0 mg, 0.123 mmol) was dissolved in anhydrous  $\text{CH}_2\text{Cl}_2$  (1 mL), which was stirred under  $\text{N}_2$  at room temperature for 12 h. After concentration in vacuo, the crude product was subjected to silica gel CC and eluted with petroleum ether-EtOAc (11:1) to yield **10c** (11.0 mg; 57%; Figures S75–S77).

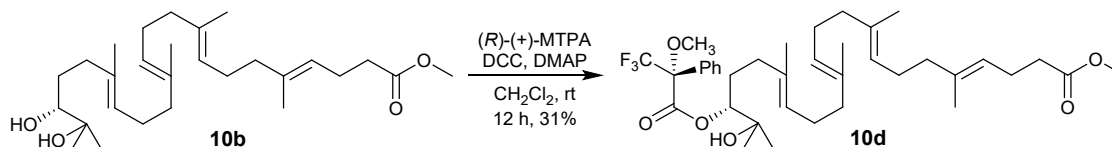

A mixture of **10b** (13.0 mg, 0.029 mmol), (*R*)-(+)-MTPA (30.0 mg, 0.128 mmol), DCC (24.0 mg, 0.117 mmol), and DMAP (15.0 mg, 0.123 mmol) was dissolved in anhydrous  $\text{CH}_2\text{Cl}_2$  (1 mL), which was stirred under  $\text{N}_2$  at room temperature for 12 h. After concentration in vacuo, the crude product was subjected to silica gel CC and eluted with petroleum ether-EtOAc (11:1) to yield **10d** (6.0 mg; 31%; Figures S78 and S79).

Compound **10b**: colorless oil;  $[\alpha]_D^{20} +6.7$  (*c* 0.03, MeOH); UV (MeOH)  $\lambda_{\text{max}}$  nm (log  $\epsilon$ ): 212 (2.8);  $^1\text{H}$  NMR (400 MHz) and  $^{13}\text{C}$  NMR (100 MHz) data ( $\text{CD}_3\text{OD}$ ), see Table S15; HRESIMS (positive mode)  $m/z$  471.3454  $[\text{M} + \text{Na}]^+$  (calcd for  $\text{C}_{28}\text{H}_{48}\text{NaO}_4^+$ , 471.3445).

Compound **10c**: colorless oil;  $[\alpha]_D^{20} -13.8$  (*c* 0.15, MeOH); UV (MeOH)  $\lambda_{\text{max}}$  nm (log  $\epsilon$ ): 218 (3.2);  $^1\text{H}$  NMR (400 MHz) and  $^{13}\text{C}$  NMR (100 MHz) data ( $\text{CD}_3\text{OD}$ ), see Table S15; HRESIMS (positive mode)  $m/z$  687.3832  $[\text{M} + \text{Na}]^+$  (calcd for  $\text{C}_{38}\text{H}_{55}\text{F}_3\text{NaO}_6^+$ , 687.3843).

Compound **10d**: colorless oil;  $[\alpha]_D^{20} +19.0$  (*c* 0.04, MeOH); UV (MeOH)  $\lambda_{\text{max}}$  nm (log  $\epsilon$ ): 215 (3.1);  $^1\text{H}$  NMR (400 MHz) and  $^{13}\text{C}$  NMR (100 MHz) data ( $\text{CD}_3\text{OD}$ ), see Table S15; HRESIMS (positive mode)  $m/z$  687.3833  $[\text{M} + \text{Na}]^+$  (calcd for  $\text{C}_{38}\text{H}_{55}\text{F}_3\text{NaO}_6^+$ , 687.3843).

#### Chemical synthesis of 10a.

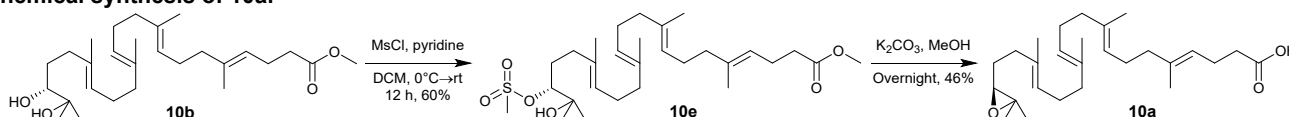

Compound **10a** was synthesized with slight modifications from previously published methods.<sup>[7,8]</sup>

To a solution of **10b** (35.1 mg, 0.078 mmol) and pyridine (94.5  $\mu\text{L}$ , 1.175 mmol) in dry  $\text{CH}_2\text{Cl}_2$  (1 mL) at 0 °C, MsCl (30.2  $\mu\text{L}$ , 0.390 mmol) was added, and the reaction mixture was stirred at room temperature for 12 h. The solvent was then removed under reduced pressure, and the residue was purified by preparative HPLC, eluting with 90%  $\text{CH}_3\text{CN}$  for 30 min at a flow rate of 17 mL/min to afford **10e** (24.7 mg, 60%;  $t_R$  = 18 min; Figures S111 and S112).

A stirred solution of **10e** (24.7 mg, 0.047 mmol) and  $\text{K}_2\text{CO}_3$  (64.9 mg, 0.470 mmol) in 1 mL MeOH at room temperature for overnight. Then, the solvent was removed under vacuum, and the residue was diluted with ice water (10 mL), followed by extraction with EtOAc (3  $\times$  10 mL). The combined organic layer was dried over  $\text{Na}_2\text{SO}_4$ , and concentrated under vacuum, and the residue was purified by preparative HPLC, eluting with 95%  $\text{CH}_3\text{CN}$  for 30 min at a flow rate of 17 mL/min to afford **10a** (9.0 mg, 46%;  $t_R$  = 19 min; Figures S113–S118).

Compound **10e**: colorless oil;  $[\alpha]_D^{20} -3.3$  (*c* 0.03, MeOH); UV (MeOH)  $\lambda_{\text{max}}$  nm (log  $\epsilon$ ): 213 (2.9);  $^1\text{H}$  NMR (400 MHz) and  $^{13}\text{C}$  NMR (100 MHz) data ( $\text{CD}_3\text{OD}$ ), see Table S20; HRESIMS (positive mode)  $m/z$  549.3219  $[\text{M} + \text{Na}]^+$  (calcd for  $\text{C}_{29}\text{H}_{50}\text{NaO}_6^+$ , 549.3220).

Compound **10a**: colorless oil;  $[\alpha]_D^{20} -7.7$  (*c* 0.03, MeOH); UV (MeOH)  $\lambda_{\text{max}}$  nm (log  $\epsilon$ ): 211 (2.8);  $^1\text{H}$  NMR (400 MHz) and  $^{13}\text{C}$  NMR (100 MHz) data ( $\text{CD}_3\text{OD}$ ), see Table S21; HRESIMS (positive mode)  $m/z$  417.3366  $[\text{M} + \text{H}]^+$  (calcd for  $\text{C}_{27}\text{H}_{45}\text{O}_3^+$ , 417.3363).

#### X-ray crystallographic analysis of 2 and 12.

**Crystallographic data for 2:**  $\text{C}_{31}\text{H}_{51}\text{NO}_5$ ,  $M = 517.72$ ,  $a = 13.5566(3)$  Å,  $b = 6.1185(2)$  Å,  $c = 34.8632(8)$  Å,  $\alpha = 90^\circ$ ,  $\beta = 91.6810(10)^\circ$ ,  $\gamma = 90^\circ$ ,  $V = 2890.52(13)$  Å<sup>3</sup>,  $T = 193.00$  K, space group  $C2$ ,  $Z = 4$ ,  $\lambda(\text{CuK}\alpha) = 1.54178$ , 42594 reflections collected, 5296 independent reflections ( $R_{\text{int}} = 0.0446$ ,  $R_{\text{sigma}} = 0.0263$ ). The final  $R1$  values were 0.0335 ( $I > 2\sigma(I)$ ). The final  $wR(F^2)$  values were 0.0880 ( $I > 2\sigma(I)$ ). The final  $R1$  values were 0.0347 (all data). The final  $wR(F^2)$  values were 0.0892 (all data). The goodness of fit on  $F^2$  was 1.068. Flack parameter = -0.03(5). Crystallographic data for **2** has been deposited into Cambridge Crystallographic Data Center as supplementary publications (number: CCDC 2309354).

**Crystallographic data for 12:**  $\text{C}_{30}\text{H}_{51}\text{NO}_5$ ,  $M = 505.71$ ,  $a = 7.2412(2)$  Å,  $b = 12.2368(4)$  Å,  $c = 34.0916(10)$  Å,  $\alpha = 90^\circ$ ,  $\beta = 90^\circ$ ,  $\gamma = 90^\circ$ ,  $V = 3020.83(16)$  Å<sup>3</sup>,  $T = 200.00(10)$  K, space group  $P2_12_1$  (no. 19),  $Z = 4$ ,  $\lambda(\text{CuK}\alpha) = 1.54178$ , 15374 reflections collected, 5945 independent reflections ( $R_{\text{int}} = 0.0398$ ,  $R_{\text{sigma}} = 0.0360$ ). The final  $R1$  values were 0.0701 ( $I > 2\sigma(I)$ ). The final  $wR(F^2)$  values were 0.1735 ( $I > 2\sigma(I)$ ). The final  $R1$  values were 0.0773 (all data). The final  $wR(F^2)$  values were 0.1770 (all data). The goodness of fit on  $F^2$  was 1.198. Flack parameter = -0.07(13). Crystallographic data for **12** has been deposited into Cambridge Crystallographic Data Center as supplementary publications (number: CCDC 2314937).

### Expression of AtoE and AtoE-mutants in *Streptomyces* and purification.

AtoE was heterologously overproduced in *S. albus* J1074 for enzyme activity assays. Plasmid pUWL201PWT was used as an *E. coli*-*Streptomyces* expression shuttle vector to overexpress *atoE* in *Streptomyces*.<sup>[2]</sup> The full-length *atoE* gene together with an N-terminal His<sub>6</sub>-tag sequence was amplified by PCR from pLDW1019 using the *PWTatoE\_F* and *PWTatoE\_R* primers. Thus, *atoE* was cloned into the *Nde*I and *Hind*III sites of pUWL201PWT to afford pLDW1020. Plasmid pLDW1020 was transformed into *E. coli* ET12567/pUZ8002 and introduced into *S. albus* J1074 by intergeneric conjugation. Positive colonies were selected using 10 µg/mL thioestrepton and named *S. albus* DLW1016. Fresh spores of DLW1016 were inoculated into TSB seed medium supplemented with 10 µg/mL thioestrepton and cultured for 2 days. Seven liters of YEME medium (3 g yeast extract, 3 g malt extract, 5 g peptone and 10 g glucose in 1 L of deionized water, pH 7.2) was inoculated with 5% (v/v) seed culture supplemented with 10 µg/mL thioestrepton and incubated at 28 °C for 2 days. After harvesting the cells by centrifugation at 3750 rpm for 30 min at 4 °C, the pellet was resuspended in lysis buffer (50 mM Tris, 300 mM NaCl, 0.8 mM TCEP and 10% glycerol) and 1 mg/mL lysozyme and 0.5 mg/mL of phenylmethylsulfonyl fluoride (protease inhibitor) were added. After incubation on ice for 2 h, the pellet was lysed by sonication, and centrifuged at 15,000 rpm for 60 min at 4 °C. The supernatant containing AtoE was purified by nickel-affinity chromatography using an ÄKTExpress system (GE Healthcare Life Sciences) equipped with a HisTrap column. The resultant protein with an N-terminal His<sub>6</sub>-tag was desalted using a HiPrep desalting column (GE Healthcare Biosciences) and concentrated using an Amicon Ultra-15 concentrator (Millipore) in 50 mM Tris, pH 7.5, containing 100 mM NaCl, and 10% glycerol. Fractions containing the target protein were pooled, concentrated, aliquoted, and flash-frozen for storage at -80 °C. Protein concentrations were determined from the absorbance at 280 nm using a molar absorptivity constant of each protein.

The protein purification of AtoE-mutants was performed according to the aforementioned procedure.

### Expression and purification of AtoA.

Plasmid pLDW1017 was transformed into the BL21 (DE3) to generate *E. coli* strain DLW1013. An overnight culture of 5 mL of DLW1013 was used to incubate 1 L LB medium in 2 L non-beveled Erlenmeyer flask, supplemented with 50 µg/mL kanamycin, and 1 mL/L trace element (aqueous solution of 50 mM FeCl<sub>3</sub>, 20 mM CaCl<sub>2</sub>, 10 mM MnSO<sub>4</sub>, 10 mM ZnSO<sub>4</sub>, 2 mM CoSO<sub>4</sub>, 2 mM CuCl<sub>2</sub>, 2 mM NiCl<sub>2</sub>, 2 mM Na<sub>2</sub>MoO<sub>4</sub>, 2 mM H<sub>3</sub>BO<sub>3</sub>). The cultures were shaken at 230 rpm and 37 °C until an optical density (OD<sub>600</sub>) of 0.6–0.8 was reached. The cultures were cooled to 4 °C, and the gene expression was induced with the addition of 0.25 mM IPTG, and the cells were grown around 18 h at 18 °C with shaking. After harvesting the cells by centrifugation at 3750 rpm for 20 min at 4 °C, the pellet was resuspended in lysis buffer (50 mM Tris, pH 8.0, containing 300 mM NaCl and 10% glycerol), lysed by sonication, and centrifuged at 15,000 rpm for 30 min at 4 °C. The supernatant was purified by nickel-affinity chromatography using an ÄKTExpress system (GE Healthcare Life Sciences) equipped with a HisTrap column. The resultant protein with an N-terminal His<sub>6</sub>-tag was desalted using a HiPrep desalting column (GE Healthcare Biosciences) and concentrated using an Amicon Ultra-15 concentrator (Millipore) in 50 mM Tris, pH 8.0, containing 100 mM NaCl, and 10% glycerol. Protein concentrations were determined from the absorbance at 280 nm using a molar absorptivity constant of each protein. Individual aliquots of each protein were stored at -80 °C until use.

### Expression and purification of AtoB and selected class II MTCs.

Plasmids pLDW1018 and pLDW1021–pLDW1027 were transformed into the BL21 (DE3) to generate *E. coli* strain DLW1014 and DLW1017–DLW1023, respectively. These recombinant strains were inoculated into 5 mL of LB containing kanamycin. After overnight incubation, the cultures were scaled up by inoculating 5 mL into 1 L of LB medium and grown at 37 °C with shaking at 230 rpm until an OD<sub>600</sub> of 0.6–0.8 was reached. The cultures were then cooled to 4 °C, and gene expression was induced by adding 0.25 mM IPTG. The cells were further incubated for approximately 18 h at 18 °C with shaking. After harvesting the cells by centrifugation at 3750 rpm for 20 min at 4 °C, the pellet was resuspended in lysis buffer (50 mM Tris, pH 8.0, containing 300 mM NaCl and 10% glycerol), lysed by sonication, and centrifuged at 15,000 rpm for 30 min at 4 °C. The supernatant was purified by nickel-affinity chromatography using an ÄKTExpress system (GE Healthcare Life Sciences) equipped with a HisTrap column. The resultant protein with an N-terminal His<sub>6</sub>-tag was desalted using a HiPrep desalting column (GE Healthcare Biosciences) and concentrated using an Amicon Ultra-15 concentrator (Millipore) in 50 mM Tris, pH 8.0, containing 100 mM NaCl, and 10% glycerol. For the purification of SerTC, the concentration step was performed in a buffer containing 50 mM Tris, pH 8.0, 300 mM NaCl, and 10% glycerol. Protein concentrations were determined from the absorbance at 280 nm using a molar absorptivity constant of each protein. Individual aliquots of each protein were stored at -80 °C until use.

### In vitro enzymatic assay of AtoA.

The in vitro reaction of AtoA were carried out in a 100 µL reaction system containing 50 mM Tris, pH 8.0, 5 µM Opt13, 10 mM Na<sub>2</sub>HPO<sub>3</sub>·5H<sub>2</sub>O, 10 µM AtoA, 500 µM substrates **11** or **12**, 1 mM NADP<sup>+</sup>, and redox partners (i) 5 µM CamA, 10 µM CamB; (ii) 5 µM Fdx, 5 µM FdR; or (iii) 5 µM RhfRed. After incubation at 30 °C for 12 h, the reactions were extracted with 100 µL EtOAc, which were then dried and directly subjected to LC-MS analysis.

### In vitro enzymatic assay of AtoB.

The in vitro reactions of AtoB were conducted in a 100 µL reaction system containing 50 mM Tris·HCl (pH 8.0) with 50 mM NaCl, 3 mM sodium pyruvate, 10 µM pyridoxal phosphate (PLP), 10 µM AtoB, and 500 µM substrate **6**. After incubation at 30 °C for 12 h, the reactions were extracted with 100 µL EtOAc, which were then dried and directly subjected to LC-MS analysis.

Preparative scale assays of AtoB were performed using 10 mg **6**, followed by extraction with EtOAc (3 × 200 mL). The EtOAc layer was purified by preparative HPLC, eluting with 30–100% CH<sub>3</sub>CN for 25 min at a flow rate of 17 mL/min to afford **14** (1.2 mg; t<sub>R</sub> = 15 min; Figures S104–S109).

To determine the reversible activity of AtoB, the conversion of **14** into **6** was conducted in a 100 µL reaction mixture containing 1 mM L-alanine (L-Ala), 10 µM PLP, 10 µM AtoB, 500 µM substrate **14**, and 50 mM Tris·HCl (pH 8.0) with 50 mM NaCl.

Compound **14**: colorless oil;  $[\alpha]_D^{20} +6.1$  (c 0.01, MeOH); UV (MeOH)  $\lambda_{\max}$  nm (log  $\epsilon$ ): 212 (2.9);  $^1\text{H}$  NMR (400 MHz) and  $^{13}\text{C}$  NMR (100 MHz) data ( $\text{CD}_3\text{OD}$ ), see **Table S19**; HRESIMS (negative mode)  $m/z$  461.3274  $[\text{M} - \text{H}]^-$  (calcd for  $\text{C}_{28}\text{H}_{48}\text{NO}_4^-$ , 461.3272).

#### **In vitro enzymatic assay of AtoE, AtoE-mutants, and selected class II MTCs.**

The in vitro reactions catalyzed by AtoE, AtoE-mutants, and selected class II MTCs were conducted out in a 100  $\mu\text{L}$  reaction system containing 50 mM Tris (pH 8.0), 10  $\mu\text{M}$  enzyme, and 0.5 mM substrate **10a**. After incubation at 30  $^\circ\text{C}$  for 12 h, the reactions were extracted with EtOAc ( $3 \times 100 \mu\text{L}$ ), which were then dried and directly subjected to LC-MS analysis.

Preparative scale assays of SerTC were performed using 6 mg **10a**, followed by extraction with EtOAc ( $3 \times 200 \text{ mL}$ ). The EtOAc layer was purified by preparative HPLC, eluting with 75%  $\text{CH}_3\text{CN}$  for 30 min at a flow rate of 17 mL/min to afford **15** (2.0 mg;  $t_R = 19$  min; Figures S128–S133).

Atolypene H (**15**): white powder;  $[\alpha]_D^{20} +9.7$  (c 0.02, MeOH); UV (MeOH)  $\lambda_{\max}$  nm (log  $\epsilon$ ): 206 (2.2);  $^1\text{H}$  NMR (400 MHz) and  $^{13}\text{C}$  NMR (100 MHz) data ( $\text{CD}_3\text{OD}$ ), see **Table S23**; HRESIMS (negative mode)  $m/z$  415.3218  $[\text{M} - \text{H}]^-$  (calcd for  $\text{C}_{27}\text{H}_{43}\text{O}_3^-$ , 415.3218).

#### **Bioinformatics analysis.**

The amino acid sequence of AtoE was used as the BLAST search query to identify putative AtoE-like MTCs in bacteria. The FASTA sequences of BLAST hits were collected and used to perform a multiple sequence alignment and phylogenetic reconstruction in MEGA X.<sup>[9]</sup> An unrooted maximum-likelihood tree was assembled with 1000 bootstrap replicants and visualized and colored using iTOL.<sup>[10]</sup> Analysis of catalytic motifs was performed by clade using MEME Suite ([meme-suite.org/meme/](http://meme-suite.org/meme/)). UniProt IDs of identified AtoE-like MTCs were used to generate a genome neighborhood diagram with EFI-GNT with a genome window of 20 genes.<sup>[11]</sup> Homologous gene clusters were selected, and Clinker was used to visualize the percent identity of each gene between the clusters.<sup>[12]</sup> A connectivity threshold of 0.3 (corresponding to 30% identity) was chosen, and connections were given for genes sharing at least 30% identity. Gene color was assigned based on predicted function.

**Table S1.** Predicted gene functions and blast results of *ato* BGC.

| Protein | Accession numbers | Size (aa) | BlastP homologs | Identity/Positives (%) | Proposed function             |
|---------|-------------------|-----------|-----------------|------------------------|-------------------------------|
| AtoA    | WP_208613467      | 394       | WP_229880587    | 52/68                  | Cytochrome P450               |
| AtoB    | WP_091316340      | 327       | WP_141924886    | 47/59                  | Aminotransferase              |
| AtoC    | WP_091316341      | 327       | WP_086885075    | 55/66                  | Polyprenyl synthetase         |
| AtoD    | WP_244170484      | 300       | WP_014058158    | 55/62                  | UbiA family prenyltransferase |
| AtoE    | WP_091316343      | 534       | WP_202237234    | 49/59                  | Sesterterpene cyclase         |
| AtoF    | WP_091316344      | 432       | WP_280882156    | 52/63                  | Epoxidase                     |

**Table S2.** Strains used in this study.

| Strains                                        | Genotype, Description                                                  | Sources (Reference)               |
|------------------------------------------------|------------------------------------------------------------------------|-----------------------------------|
| <i>E. coli</i> DH5α                            | Host strain for general cloning                                        | General biosystems (Anhui, China) |
| <i>E. coli</i> BL21 (DE3)                      | Heterologous host for protein expression                               | General biosystems (Anhui, China) |
| <i>E. coli</i> ET12567/pUZ8002                 | Methylation-deficient <i>E. coli</i> host for intergeneric conjugation | [13]                              |
| <i>Amycolatopsis tolypomycina</i> NRRL B-24205 | <i>Actinomycetes</i> used to extract the genome as a PCR template      | [14]                              |
| <i>Streptomyces albus</i> J1074                | Host strain for heterologous expression                                | [15]                              |
| <i>Streptomyces lividans</i> SBT18             | Host strain for heterologous expression                                | [16]                              |
| <i>S. albus</i> DLW1001                        | <i>S. albus</i> J1074 integrated with empty pSET152 vector             | This study                        |
| <i>S. albus</i> DLW1002                        | <i>S. albus</i> J1074 integrated with pLDW1007                         | This study                        |
| <i>S. albus</i> DLW1003                        | <i>S. albus</i> J1074 integrated with pLDW1008                         | This study                        |
| <i>S. albus</i> DLW1004                        | <i>S. albus</i> J1074 integrated with pLDW1009                         | This study                        |
| <i>S. albus</i> DLW1005                        | <i>S. albus</i> J1074 integrated with pLDW1010                         | This study                        |
| <i>S. albus</i> DLW1006                        | <i>S. albus</i> J1074 integrated with pLDW1011                         | This study                        |
| <i>S. albus</i> DLW1007                        | <i>S. albus</i> J1074 integrated with pLDW1012                         | This study                        |
| <i>S. albus</i> DLW1008                        | <i>S. albus</i> J1074 integrated with pLDW1013                         | This study                        |
| <i>S. albus</i> DLW1009                        | <i>S. albus</i> J1074 integrated with pLDW1014                         | This study                        |
| <i>S. albus</i> DLW1010                        | <i>S. albus</i> J1074 integrated with pLDW1015                         | This study                        |
| <i>S. albus</i> DLW1011                        | <i>S. albus</i> J1074 integrated with pLDW1016                         | This study                        |
| <i>S. lividans</i> DLW1012                     | <i>S. lividans</i> SBT18 integrated with pLDW1014                      | This study                        |
| <i>E. coli</i> DLW1013                         | <i>E. coli</i> BL21 harboring pLDW1017                                 | This study                        |
| <i>E. coli</i> DLW1014                         | <i>E. coli</i> BL21 harboring pLDW1018                                 | This study                        |
| <i>E. coli</i> DLW1015                         | <i>E. coli</i> BL21 harboring pLDW1019                                 | This study                        |
| <i>S. albus</i> DLW1016                        | <i>S. albus</i> J1074 containing pLDW1020 for AtoE protein expression  | This study                        |
| <i>E. coli</i> DLW1017                         | <i>E. coli</i> BL21 harboring pLDW1021                                 | This study                        |
| <i>E. coli</i> DLW1018                         | <i>E. coli</i> BL21 harboring pLDW1022                                 | This study                        |
| <i>E. coli</i> DLW1019                         | <i>E. coli</i> BL21 harboring pLDW1023                                 | This study                        |
| <i>E. coli</i> DLW1020                         | <i>E. coli</i> BL21 harboring pLDW1024                                 | This study                        |
| <i>E. coli</i> DLW1021                         | <i>E. coli</i> BL21 harboring pLDW1025                                 | This study                        |
| <i>E. coli</i> DLW1022                         | <i>E. coli</i> BL21 harboring pLDW1026                                 | This study                        |
| <i>E. coli</i> DLW1023                         | <i>E. coli</i> BL21 harboring pLDW1027                                 | This study                        |



**Table S3.** Plasmids used in this study.

| Plasmid     | Description                                                                                                                                                            | Source (Reference) |
|-------------|------------------------------------------------------------------------------------------------------------------------------------------------------------------------|--------------------|
| pSET152     | <i>E. coli-Streptomyces</i> integrating vector, including the promoter ermE, Apr <sup>r</sup>                                                                          | [17]               |
| pUWL201PWT  | <i>E. coli-Streptomyces</i> expression shuttle vector, Tsr <sup>r</sup>                                                                                                | [18]               |
| pET-28a(+)  | Protein co-expression vector used in <i>E. coli</i> , encoding N-terminal 6× His tag, Kan <sup>r</sup>                                                                 | Novagen            |
| pRSF-Duet-1 | Protein co-expression vector used in <i>E. coli</i> , N-terminal 6× His tag, Kan <sup>r</sup>                                                                          | Novagen            |
| pLDW1001    | pRSF-Duet-1 harboring <i>atoA</i> , P12R10, and T2, Kan <sup>r</sup>                                                                                                   | This study         |
| pLDW1002    | pRSF-Duet-1 harboring <i>atoE</i> , P12R10, and T2, Kan <sup>r</sup>                                                                                                   | This study         |
| pLDW1003    | pRSF-Duet-1 harboring <i>atoF</i> , P12R10, and T2, Kan <sup>r</sup>                                                                                                   | This study         |
| pLDW1004    | pRSF-Duet-1 harboring <i>atoB</i> , P9R7, and T4, Kan <sup>r</sup>                                                                                                     | This study         |
| pLDW1005    | pRSF-Duet-1 harboring <i>atoC</i> , P3R5, and T9, Kan <sup>r</sup>                                                                                                     | This study         |
| pLDW1006    | pRSF-Duet-1 harboring <i>atoD</i> , P10R10, and T10, Kan <sup>r</sup>                                                                                                  | This study         |
| pLDW1007    | pSET152 harboring P3R5- <i>atoC</i> -T9                                                                                                                                | This study         |
| pLDW1008    | pSET152 harboring <i>atoC</i> and <i>atoD</i> , along with their respective promoters, RBS, and terminators.                                                           | This study         |
| pLDW1009    | pSET152 harboring <i>atoC</i> and <i>atoE</i> , along with their respective promoters, RBS, and terminators.                                                           | This study         |
| pLDW1010    | pSET152 harboring <i>atoC</i> and <i>atoF</i> , along with their respective promoters, RBS, and terminators.                                                           | This study         |
| pLDW1011    | pSET152 harboring <i>atoC</i> , <i>atoD</i> , and <i>atoE</i> , along with their respective promoters, RBS, and terminators.                                           | This study         |
| pLDW1012    | pSET152 harboring <i>atoC</i> , <i>atoE</i> , and <i>atoF</i> , along with their respective promoters, RBS, and terminators.                                           | This study         |
| pLDW1013    | pSET152 harboring <i>atoC</i> , <i>atoD</i> , and <i>atoF</i> , along with their respective promoters, RBS, and terminators.                                           | This study         |
| pLDW1014    | pSET152 harboring <i>atoC</i> , <i>atoD</i> , <i>atoE</i> , and <i>atoF</i> , along with their respective promoters, RBS, and terminators.                             | This study         |
| pLDW1015    | pSET152 harboring <i>atoB</i> , <i>atoC</i> , <i>atoD</i> , <i>atoE</i> , and <i>atoF</i> , along with their respective promoters, RBS, and terminators.               | This study         |
| pLDW1016    | pSET152 harboring <i>atoA</i> , <i>atoB</i> , <i>atoC</i> , <i>atoD</i> , <i>atoE</i> , and <i>atoF</i> , along with their respective promoters, RBS, and terminators. | This study         |
| pLDW1017    | pET-28a(+) harboring <i>atoA</i>                                                                                                                                       | This study         |
| pLDW1018    | pET-28a(+) harboring <i>atoB</i>                                                                                                                                       | This study         |
| pLDW1019    | pET-28a(+) harboring <i>atoE</i>                                                                                                                                       | This study         |
| pLDW1020    | pUWL201PWT harboring <i>atoE</i> gene together with an N-terminal His <sub>6</sub> -tag                                                                                | This study         |
| pLDW1021    | pET-28a(+) harboring <i>SerTC</i>                                                                                                                                      | This study         |
| pLDW1022    | pET-28a(+) harboring <i>SmaTC</i>                                                                                                                                      | This study         |
| pLDW1023    | pET-28a(+) harboring <i>UtaTC</i>                                                                                                                                      | This study         |
| pLDW1024    | pET-28a(+) harboring <i>CcrTC</i>                                                                                                                                      | This study         |
| pLDW1025    | pET-28a(+) harboring <i>SsyTC</i>                                                                                                                                      | This study         |
| pLDW1026    | pET-28a(+) harboring <i>AxyTC</i>                                                                                                                                      | This study         |
| pLDW1027    | pET-28a(+) harboring <i>PshTC</i>                                                                                                                                      | This study         |

**Table S4.** Primers used in this study.

| Primers                             | Nucleotide Sequence (5'-3')                     |
|-------------------------------------|-------------------------------------------------|
| <b>For construction of pLDW1001</b> |                                                 |
| pRSFDuet-atoA-F                     | AGAAGGAGGTTAACACATATGATGTCCTGCCTGCCTTCC         |
| pRSFDuet-atoA-R                     | GAATTTGGTACCGAGCATATGctaccaggtgatcgtagctcg      |
| <b>For construction of pLDW1002</b> |                                                 |
| pRSFDuet-atoE-F                     | AGAAGGAGGTTAACACATATGATGTCCTGAGACGGATCTGCTCGACG |
| pRSFDuet-atoE-R                     | GAATTTGGTACCGAGCATATGTCATCGCGCCGCCTCCCG         |
| <b>For construction of pLDW1003</b> |                                                 |
| pRSFDuet-atoF-F                     | AGAAGGAGGTTAACACATATGATGACCGACGTA CTCTGTGTGC    |
| pRSFDuet-atoF-R                     | GAATTTGGTACCGAGCATATGTCACACGCCGAGGACCA          |
| <b>For construction of pLDW1004</b> |                                                 |
| pRSFDuet-atoB-F                     | AGAAGGAGGTACCAACTGCAGATGGACACAGAACGGCTGCG       |
| pRSFDuet-atoB-R                     | GATTTTTTTTATCTGCTGCAGTCATGCGGGAACTCCGC          |
| <b>For construction of pLDW1005</b> |                                                 |
| pRSFDuet-atoC-F                     | CAGAAGGAGATTATAAAGCTTATGAGCATCGCCCTGGAAC        |
| pRSFDuet-atoC-R                     | TTTTTTGGTACCGAGAAGCTTTCACCGCTCCCGATCGAC         |
| <b>For construction of pLDW1006</b> |                                                 |
| pRSFDuet-atoD-F                     | AGAAGGAGGTTAACTTAAGATGCTGTGCGCACACGTGC          |
| pRSFDuet-atoD-R                     | TTCTGACTCATAACCTTAAGTCAGGCATGGCGTCCCTC          |
| <b>For construction of pLDW1007</b> |                                                 |
| pSET-atoC-F                         | GGTATCGATAAGCTTAGTGGAGGCTACCTCACAATGG           |
| pSET-atoC-R                         | CAGGTCGACTCTAGAGGACCAAAAAAAAAAAGACGC            |
| <b>For construction of pLDW1008</b> |                                                 |
| 152-AtoCDup-F                       | GGTATCGATAAGCTTGATATCAGTGGAGGCTACCTCACAATGG     |
| 152-AtoCDup-R                       | AGCCCTGCTAGGACCAAAAAAAAAAAGACGC                 |
| 152-AtoCDdown-F                     | TTTTTGGTCTAGCAGGGCTCCAAAACCTAACG                |
| 152-AtoCDdown-R                     | CAGGTCGACTCTAGAGGATCCAAAGCAAGCAAGAAAAAAGGC      |
| <b>For construction of pLDW1009</b> |                                                 |
| 152-AtoCDup-F                       | GGTATCGATAAGCTTGATATCAGTGGAGGCTACCTCACAATGG     |
| 152-ProsAtoCEUP-R                   | CCCGCACAGGACCAAAAAAAAAAAGACGC                   |
| 152-ProsAtoCEDown-F                 | TTTTTTGGTCTGTGCGGGCTCTAACACGTC                  |
| 152-ProsAtoCEDown-R                 | CAGGTCGACTCTAGAGGACCAAAAACGAAAAAAGACGC          |
| <b>For construction of pLDW1011</b> |                                                 |
| 152-AtoCDup-F                       | GGTATCGATAAGCTTGATATCAGTGGAGGCTACCTCACAATGG     |
| 152-ProsAtoCEDown-R                 | CAGGTCGACTCTAGAGGACCAAAAACGAAAAAAGACGC          |
| <b>For construction of pLDW1012</b> |                                                 |
| 152-AtoCDup-F                       | GGTATCGATAAGCTTGATATCAGTGGAGGCTACCTCACAATGG     |
| 152-ProsAtoCEUP-R                   | CCCGCACAGGACCAAAAAAAAAAAGACGC                   |
| 152-ProsAtoCEDown-F                 | TTTTTTGGTCTGTGCGGGCTCTAACACGTC                  |
| 152-ProsAtoCEDown-R                 | CAGGTCGACTCTAGAGGACCAAAAACGAAAAAAGACGC          |
| <b>For construction of pLDW1013</b> |                                                 |
| 152-AtoCDup-F                       | GGTATCGATAAGCTTGATATCAGTGGAGGCTACCTCACAATGG     |
| 152-ProsAtoCDF-R                    | GTTAGAGCCCGCACAAAAGCAAGCAAGAAAAAAGGC            |
| 152-ProsAtoCDF-F                    | GCTTTTGTGCGGGCTCTAACACGTCC                      |
| 152-ProsAtoCEDown-R                 | CAGGTCGACTCTAGAGGACCAAAAACGAAAAAAGACGC          |
| <b>For construction of pLDW1014</b> |                                                 |
| 152-AtoCDup-F                       | GGTATCGATAAGCTTGATATCAGTGGAGGCTACCTCACAATGG     |
| 152-ProsAtoCDEF-R                   | CCGCACAGGACCAAAAACGAAAAAAGACGCTTTTC             |
| 152-ProsAtoCDEF-F                   | TTCGTTTTGGTCTGTGCGGGCTCTAACACGTCC               |
| 152-ProsAtoCEDown-R                 | CAGGTCGACTCTAGAGGACCAAAAACGAAAAAAGACGC          |
| <b>For construction of pLDW1015</b> |                                                 |
| 152-AtoBCDEF-1F                     | GGTATCGATAAGCTTGATATCCAGGTCGGCTGGTTGGCT         |
| 152-ProsAtoCDEF-R                   | CCGCACAGGACCAAAAACGAAAAAAGACGCTTTTC             |
| 152-ProsAtoCDEF-F                   | TTCGTTTTGGTCTGTGCGGGCTCTAACACGTCC               |
| 152-ProsAtoCEDown-R                 | CAGGTCGACTCTAGAGGACCAAAAACGAAAAAAGACGC          |
| <b>For construction of pLDW1016</b> |                                                 |
| 152-AtoABCDEFup-F                   | GGTATCGATAAGCTTGATATCTGTGCGGGCTCTAACACGTC       |
| 152-AtoABCDEFup-R                   | CAACCAGCCGACCTGGGACCAAAAACGAAAAAAGACGC          |
| 152-AtoBCDEFdown-F                  | TTTCGTTTTGGTCCCAGGTCGGCTGGTTGGCT                |

---

|                                     |                                          |
|-------------------------------------|------------------------------------------|
| 152-ProsAtoCEDown-R                 | CAGGTGCGACTCTAGAGGACCAAAACGAAAAAGACGC    |
| <b>For construction of pLDW1017</b> |                                          |
| 28a-atoA-F                          | GTGCCGCGCGGCAGCATGTCCCTGCCTGCCTTCC       |
| 28a-atoA-R                          | GTGGTGGTGGTGGTGCTACCAGGTGATCGGTAGCTCG    |
| <b>For construction of pLDW1018</b> |                                          |
| 28a-atoB-F                          | GTGCCGCGCGGCAGCATGGACACAGAACGGCTGCG      |
| 28a-atoB-R                          | GTGGTGGTGGTGGTGTGCATGCGGGGAACCTCCG       |
| <b>For construction of pLDW1019</b> |                                          |
| 28a-AtoE-F                          | GTGCCGCGCGGCAGCATGCCTGAGACGGATCTGCTC     |
| 28a-AtoE-R                          | GTGGTGGTGGTGGTGTGCATGCGCCGCCTCCCG        |
| <b>For construction of pLDW1020</b> |                                          |
| pUWLNdeI-AtoE-F                     | AAAGAGGAGAAATTACATATGATGGGCAGCAGCCATCATC |
| pUWLHindIII-AtoE-R                  | GGACCAAAACGAAAAAGACGCTCATCGCGCCGCCTCCCG  |
| <b>For construction of pLDW1021</b> |                                          |
| 28a-SerTC-F                         | GTGCCGCGCGGCAGCATGACCTTCTACGCGCGG        |
| 28a-SerTC-R                         | GTGGTGGTGGTGGTGTGCATGCGCCACCGCCTT        |
| <b>For construction of pLDW1022</b> |                                          |
| 28a-SmaTC-F                         | GTGCCGCGCGGCAGCATGCCCCCTTCCGCCTTG        |
| 28a-SmaTC-R                         | GTGGTGGTGGTGGTGTGGCCTGCCTCCTTCGCC        |
| <b>For construction of pLDW1023</b> |                                          |
| 28a-UtaTC-F                         | GTGCCGCGCGGCAGCATGACTTCGGTGCACGTCTGA     |
| 28a-UtaTC-R                         | GTGGTGGTGGTGGTGC GAAGTCGTGCCCGCCG        |
| <b>For construction of pLDW1024</b> |                                          |
| 28a-CcrTC-F                         | GTGCCGCGCGGCAGCGTGAATTCCACGGAGCTGACCG    |
| 28a-CcrTC-R                         | GTGGTGGTGGTGGTGTGCCGCTCGGCCTGCCG         |
| <b>For construction of pLDW1025</b> |                                          |
| 28a-SsyTC-F                         | GTGCCGCGCGGCAGCATGACAGCCGTGTCCGACG       |
| 28a-SsyTC-R                         | GTGGTGGTGGTGGTGTG CAGGCGACCATACCCGG      |
| <b>For construction of pLDW1026</b> |                                          |
| 28a-AxyTC-F                         | GTGCCGCGCGGCAGCATGACGGAACCTCGCACTCGA     |
| 28a-AxyTC-R                         | GTGGTGGTGGTGGTGTCACTCATGGCCCGCTCC        |
| <b>For construction of pLDW1027</b> |                                          |
| 28a-PshTC-F                         | GTGCCGCGCGGCAGCGTGACCAGGGCCGGGGAA        |
| 28a-PshTC-R                         | GTGGTGGTGGTGGTGTGCATGCGCACCCGGCCTC       |

---

**Table S5.** Summary of  $^1\text{H}$  NMR (400 MHz) and  $^{13}\text{C}$  NMR (100 MHz) data for atolypene C (**2**) in methanol- $d_4$  ( $\delta$  in ppm,  $J$  in Hz).

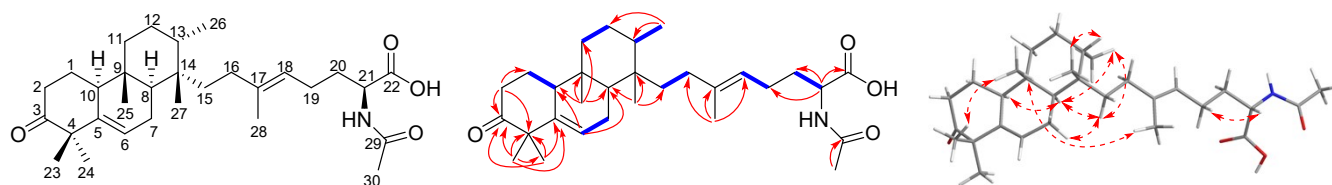

Chemical structure of **2** and  $^1\text{H}$ - $^1\text{H}$  COSY (—), key HMBC correlations (—), and key ROESY correlations (---).

| No. | $\delta_{\text{C}}$ , type | $\delta_{\text{H}}$ , mult. ( $J$ , Hz) |
|-----|----------------------------|-----------------------------------------|
| 1a  | 23.1, CH <sub>2</sub>      | 1.95, m                                 |
| 1b  |                            | 1.58, m                                 |
| 2a  | 38.9, CH <sub>2</sub>      | 2.52, m                                 |
| 2b  |                            | 2.35, m                                 |
| 3   | 217.8, C                   |                                         |
| 4   | 51.1, C                    |                                         |
| 5   | 143.8, C                   |                                         |
| 6   | 122.3, CH                  | 5.73, m                                 |
| 7a  | 24.6, CH <sub>2</sub>      | 2.05, m                                 |
| 7b  |                            | 1.95, overlapped                        |
| 8   | 45.5, CH                   | 1.47, m                                 |
| 9   | 37.1, C                    |                                         |
| 10  | 51.4, CH                   | 2.29, m                                 |
| 11a | 33.4, CH <sub>2</sub>      | 1.58, overlapped                        |
| 11b |                            | 1.47, overlapped                        |
| 12a | 26.4, CH <sub>2</sub>      | 1.97, overlapped                        |
| 12b |                            | 1.34, m                                 |
| 13  | 36.4, CH                   | 1.68, m                                 |
| 14  | 38.2, C                    |                                         |
| 15a | 39.7, CH <sub>2</sub>      | 1.47, overlapped                        |
| 15b |                            | 1.13, m                                 |
| 16a | 33.8, CH <sub>2</sub>      | 1.95, 2H, overlapped                    |
| 16b |                            |                                         |
| 17  | 139.0, C                   |                                         |
| 18  | 123.4, CH                  | 5.14, t (7.2)                           |
| 19a | 25.3, CH <sub>2</sub>      | 2.08, m                                 |
| 19b |                            | 1.96, overlapped                        |
| 20a | 32.7, CH <sub>2</sub>      | 1.85, m                                 |
| 20b |                            | 1.69, overlapped                        |
| 21  | 53.4, CH                   | 4.33, q (4.6)                           |
| 22  | 176.1, C                   |                                         |
| 23  | 29.2, CH <sub>3</sub>      | 1.24, s                                 |
| 24  | 24.6, CH <sub>3</sub>      | 1.21, s                                 |
| 25  | 15.6, CH <sub>3</sub>      | 0.90, s                                 |
| 26  | 14.7, CH <sub>3</sub>      | 0.99, d (7.0)                           |
| 27  | 21.2, CH <sub>3</sub>      | 1.03, s                                 |
| 28  | 16.3, CH <sub>3</sub>      | 1.61, s                                 |
| 29  | 173.4, C                   |                                         |
| 30  | 22.4, CH <sub>3</sub>      | 1.99, s                                 |

**Table S6.** Summary of  $^1\text{H}$  NMR (400 MHz) and  $^{13}\text{C}$  NMR (100 MHz) data for atolypene D (**3**) in methanol- $d_4$  ( $\delta$  in ppm,  $J$  in Hz).

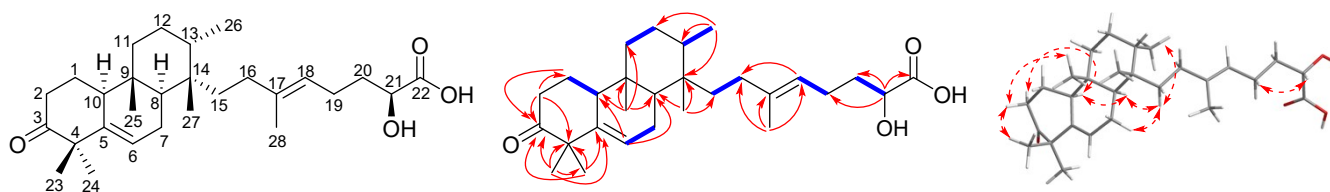

Chemical structure of **3** and  $^1\text{H}$ - $^1\text{H}$  COSY (—), key HMBC correlations (—), and key ROESY correlations (---).

| No. | $\delta_{\text{C}}$ , type | $\delta_{\text{H}}$ , mult. ( $J$ , Hz) |
|-----|----------------------------|-----------------------------------------|
| 1a  | 23.1, $\text{CH}_2$        | 1.95, m                                 |
| 1b  |                            | 1.60, m                                 |
| 2a  | 38.9, $\text{CH}_2$        | 2.53, m                                 |
| 2b  |                            | 2.36, m                                 |
| 3   | 217.8, C                   |                                         |
| 4   | 51.1, C                    |                                         |
| 5   | 143.8, C                   |                                         |
| 6   | 122.3, CH                  | 5.73, m                                 |
| 7a  | 24.6, $\text{CH}_2$        | 2.12, m                                 |
| 7b  |                            | 1.95, overlapped                        |
| 8   | 45.5, CH                   | 1.46, m                                 |
| 9   | 37.1, C                    |                                         |
| 10  | 51.4, CH                   | 2.29, m                                 |
| 11a | 33.4, $\text{CH}_2$        | 1.59, overlapped                        |
| 11b |                            | 1.49, overlapped                        |
| 12a | 26.4, $\text{CH}_2$        | 1.97, overlapped                        |
| 12b |                            | 1.34, m                                 |
| 13  | 36.4, CH                   | 1.67, m                                 |
| 14  | 38.1, C                    |                                         |
| 15a | 39.7, $\text{CH}_2$        | 1.47, overlapped                        |
| 15b |                            | 1.13, m                                 |
| 16a | 33.9, $\text{CH}_2$        | 1.48, 2H, overlapped                    |
| 16b |                            |                                         |
| 17  | 138.3, C                   |                                         |
| 18  | 124.0, CH                  | 5.16, t (7.2)                           |
| 19a | 24.6, $\text{CH}_2$        | 2.12, overlapped                        |
| 19b |                            | 1.95, overlapped                        |
| 20a | 35.6, $\text{CH}_2$        | 1.77, m                                 |
| 20b |                            | 1.66, overlapped                        |
| 21  | 71.2, CH                   | 4.07, q (4.0)                           |
| 22  | 178.5, C                   |                                         |
| 23  | 29.2, $\text{CH}_3$        | 1.24, s                                 |
| 24  | 24.6, $\text{CH}_3$        | 1.21, s                                 |
| 25  | 15.6, $\text{CH}_3$        | 0.90, s                                 |
| 26  | 14.7, $\text{CH}_3$        | 0.99, d (7.0)                           |
| 27  | 21.2, $\text{CH}_3$        | 1.03, s                                 |
| 28  | 16.3, $\text{CH}_3$        | 1.64, s                                 |

**Table S7.** Summary of  $^1\text{H}$  NMR (400 MHz) and  $^{13}\text{C}$  NMR (100 MHz) data for **4** in methanol- $d_4$  ( $\delta$  in ppm,  $J$  in Hz).

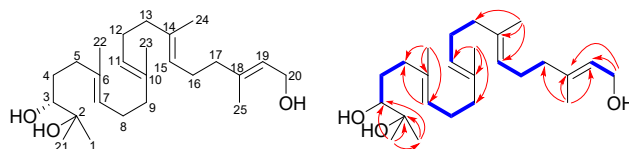

Chemical structure of **4** and  $^1\text{H}$ - $^1\text{H}$  COSY ( — ), and key HMBC correlations ( — ).

| No. | $\delta_{\text{C}}$ , type | $\delta_{\text{H}}$ , mult. ( $J$ , Hz) |
|-----|----------------------------|-----------------------------------------|
| 1   | 24.9, $\text{CH}_3$        | 1.13, s                                 |
| 2   | 73.8, C                    |                                         |
| 3   | 79.1, CH                   | 3.23, dd (10.5, 1.6)                    |
| 4a  | 30.8, $\text{CH}_2$        | 1.71, m                                 |
| 4b  |                            | 1.34, m                                 |
| 5a  | 37.9, $\text{CH}_2$        | 2.25, m                                 |
| 5b  |                            | 2.00, m                                 |
| 6   | 136.2, C                   |                                         |
| 7   | 125.5, CH                  | 5.18, m                                 |
| 8a  | 27.4, $\text{CH}_2$        | 2.09, 2H, m                             |
| 8b  |                            |                                         |
| 9a  | 40.9, $\text{CH}_2$        | 2.09, overlapped                        |
| 9b  |                            | 2.00, overlapped                        |
| 10  | 136.0, C                   |                                         |
| 11  | 125.5, CH                  | 5.12, m                                 |
| 12a | 27.6, $\text{CH}_2$        | 2.09, overlapped                        |
| 12b |                            | 2.00, overlapped                        |
| 13a | 40.9, $\text{CH}_2$        | 2.09, overlapped                        |
| 13b |                            | 2.00, overlapped                        |
| 14  | 135.9, C                   |                                         |
| 15  | 125.5, CH                  | 5.12, overlapped                        |
| 16a | 27.7, $\text{CH}_2$        | 2.09, overlapped                        |
| 16b |                            | 2.00, overlapped                        |
| 17a | 40.8, $\text{CH}_2$        | 2.09, 2H, overlapped                    |
| 17b |                            |                                         |
| 18  | 139.5, C                   |                                         |
| 19  | 124.6, CH                  | 5.36, m                                 |
| 20a | 59.4, $\text{CH}_2$        | 4.08, 2H, d (6.8)                       |
| 20b |                            |                                         |
| 21  | 25.7, $\text{CH}_3$        | 1.16, s                                 |
| 22  | 16.2, $\text{CH}_3$        | 1.62, s                                 |
| 23  | 16.1, $\text{CH}_3$        | 1.61, s                                 |
| 24  | 16.0, $\text{CH}_3$        | 1.60, s                                 |
| 25  | 16.3, $\text{CH}_3$        | 1.67, s                                 |

**Table S8.** Summary of  $^1\text{H}$  NMR (400 MHz) and  $^{13}\text{C}$  NMR (100 MHz) data for **5** in methanol- $d_4$  ( $\delta$  in ppm,  $J$  in Hz).

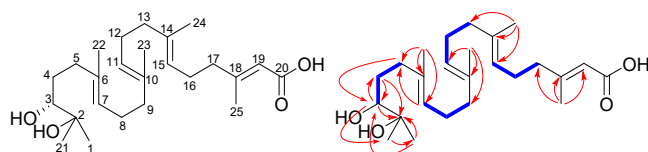

Chemical structure of **5** and  $^1\text{H}$ - $^1\text{H}$  COSY (—), and key HMBC correlations (—).

| No. | $\delta_{\text{C}}$ , type | $\delta_{\text{H}}$ , mult. ( $J$ , Hz) |
|-----|----------------------------|-----------------------------------------|
| 1   | 25.0, $\text{CH}_3$        | 1.13, s                                 |
| 2   | 73.8, C                    |                                         |
| 3   | 79.1, CH                   | 3.24, dd (10.5, 1.4)                    |
| 4a  | 30.9, $\text{CH}_2$        | 1.70, m                                 |
| 4b  |                            | 1.34, m                                 |
| 5a  | 37.9, $\text{CH}_2$        | 2.25, m                                 |
| 5b  |                            | 2.00, m                                 |
| 6   | 136.0, C                   |                                         |
| 7   | 125.6, CH                  | 5.18, t (6.8)                           |
| 8a  | 27.4, $\text{CH}_2$        | 2.09, m                                 |
| 8b  |                            | 2.00, overlapped                        |
| 9a  | 40.8, $\text{CH}_2$        | 2.09, overlapped                        |
| 9b  |                            | 2.00, overlapped                        |
| 10  | 136.0, C                   |                                         |
| 11  | 125.4, CH                  | 5.12, m                                 |
| 12a | 27.1, $\text{CH}_2$        | 2.19, 2H, m                             |
| 12b |                            |                                         |
| 13a | 40.8, $\text{CH}_2$        | 2.09, overlapped                        |
| 13b |                            | 2.00, overlapped                        |
| 14  | 137.0, C                   |                                         |
| 15  | 124.4, CH                  | 5.12, overlapped                        |
| 16a | 27.7, $\text{CH}_2$        | 2.09, overlapped                        |
| 16b |                            | 2.00, overlapped                        |
| 17a | 41.9, $\text{CH}_2$        | 2.19, 2H, overlapped                    |
| 17b |                            |                                         |
| 18  | 159.8, C                   |                                         |
| 19  | 118.0, CH                  | 4.87, overlapped                        |
| 20  | 171.3, C                   |                                         |
| 21  | 25.6, $\text{CH}_3$        | 1.16, s                                 |
| 22  | 16.1, $\text{CH}_3$        | 1.62, s                                 |
| 23  | 16.1, $\text{CH}_3$        | 1.61, s                                 |
| 24  | 16.2, $\text{CH}_3$        | 1.60, s                                 |
| 25  | 18.9, $\text{CH}_3$        | 2.12, s                                 |

**Table S9.** Summary of  $^1\text{H}$  NMR (400 MHz) and  $^{13}\text{C}$  NMR (100 MHz) data for **6** in methanol- $d_4$  ( $\delta$  in ppm,  $J$  in Hz).

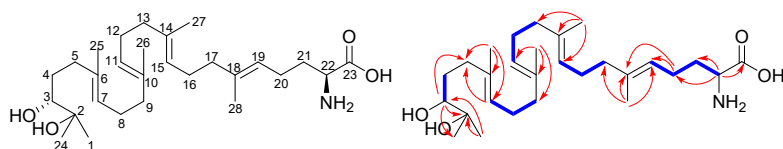

Chemical structure of **6** and  $^1\text{H}$ - $^1\text{H}$  COSY (—), and key HMBC correlations (—→).

| No. | $\delta_{\text{C}}$ , type | $\delta_{\text{H}}$ , mult. (J, Hz) |
|-----|----------------------------|-------------------------------------|
| 1   | 24.9, $\text{CH}_3$        | 1.13, s                             |
| 2   | 73.8, C                    |                                     |
| 3   | 79.1, CH                   | 3.24, dd (10.5, 1.6)                |
| 4a  | 30.9, $\text{CH}_2$        | 1.71, m                             |
| 4b  |                            | 1.34, m                             |
| 5a  | 37.9, $\text{CH}_2$        | 2.25, m                             |
| 5b  |                            | 2.00, m                             |
| 6   | 135.9, C                   |                                     |
| 7   | 125.6, CH                  | 5.17, m                             |
| 8a  | 27.6, $\text{CH}_2$        | 2.00, 2H, overlapped                |
| 8b  |                            |                                     |
| 9a  | 40.8, $\text{CH}_2$        | 2.09, overlapped                    |
| 9b  |                            | 2.00, overlapped                    |
| 10  | 136.1, C                   |                                     |
| 11  | 125.4, CH                  | 5.12, m                             |
| 12a | 27.7, $\text{CH}_2$        | 2.09, overlapped                    |
| 12b |                            | 2.00, overlapped                    |
| 13a | 40.9, $\text{CH}_2$        | 2.09, overlapped                    |
| 13b |                            | 2.00, overlapped                    |
| 14  | 136.1, C                   |                                     |
| 15  | 125.5, CH                  | 5.12, overlapped                    |
| 16a | 27.7, $\text{CH}_2$        | 2.09, overlapped                    |
| 16b |                            | 2.00, overlapped                    |
| 17a | 40.9, $\text{CH}_2$        | 2.19, 2H, overlapped                |
| 17b |                            |                                     |
| 18  | 137.9, C                   |                                     |
| 19  | 123.8, CH                  | 5.17, overlapped                    |
| 20a | 25.0, $\text{CH}_2$        | 2.14, 2H, m                         |
| 20b |                            |                                     |
| 21a | 32.7, $\text{CH}_2$        | 1.89, m                             |
| 21b |                            | 1.82, m                             |
| 22  | 56.1, CH                   | 3.53, dd (6.8, 5.2)                 |
| 23  | 174.5, C                   |                                     |
| 24  | 25.6, $\text{CH}_3$        | 1.16, s                             |
| 25  | 16.2, $\text{CH}_3$        | 1.62, s                             |
| 26  | 16.2, $\text{CH}_3$        | 1.60, overlapped                    |
| 27  | 16.2, $\text{CH}_3$        | 1.60, overlapped                    |
| 28  | 16.2, $\text{CH}_3$        | 1.65, s                             |



**Table S10.** Summary of  $^1\text{H}$  NMR (400 MHz) and  $^{13}\text{C}$  NMR (100 MHz) data for **7** in methanol- $d_4$  ( $\delta$  in ppm,  $J$  in Hz).

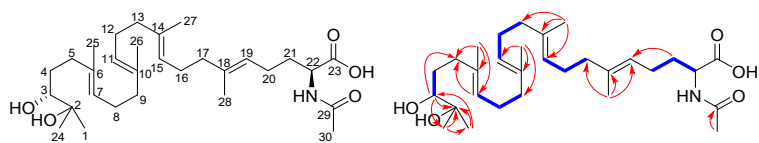

Chemical structure of **7** and  $^1\text{H}$ - $^1\text{H}$  COSY (—), and key HMBC correlations (—).

| No. | $\delta_{\text{C}}$ , type | $\delta_{\text{H}}$ , mult. ( $J$ , Hz) |
|-----|----------------------------|-----------------------------------------|
| 1   | 25.0, $\text{CH}_3$        | 1.12, s                                 |
| 2   | 73.8, C                    |                                         |
| 3   | 79.1, CH                   | 3.23, d (10.5)                          |
| 4a  | 30.9, $\text{CH}_2$        | 1.70, m                                 |
| 4b  |                            | 1.34, m                                 |
| 5a  | 38.0, $\text{CH}_2$        | 2.25, m                                 |
| 5b  |                            | 2.00, m                                 |
| 6   | 135.8, C                   |                                         |
| 7   | 125.6, CH                  | 5.18, m                                 |
| 8a  | 27.7, $\text{CH}_2$        | 2.09, m                                 |
| 8b  |                            | 2.00, overlapped                        |
| 9a  | 40.9, $\text{CH}_2$        | 2.09, overlapped                        |
| 9b  |                            | 2.00, overlapped                        |
| 10  | 136.0, C                   |                                         |
| 11  | 125.4, CH                  | 5.12, m                                 |
| 12a | 27.6, $\text{CH}_2$        | 2.09, overlapped                        |
| 12b |                            | 2.00, overlapped                        |
| 13a | 40.9, $\text{CH}_2$        | 2.09, overlapped                        |
| 13b |                            | 2.00, overlapped                        |
| 14  | 136.0, C                   |                                         |
| 15  | 125.5, CH                  | 5.12, overlapped                        |
| 16a | 27.7, $\text{CH}_2$        | 2.09, overlapped                        |
| 16b |                            | 2.00, overlapped                        |
| 17a | 40.9, $\text{CH}_2$        | 2.09, overlapped                        |
| 17b |                            | 2.00, overlapped                        |
| 18  | 137.6, C                   |                                         |
| 19  | 124.1, CH                  | 5.13, overlapped                        |
| 20a | 25.3, $\text{CH}_2$        | 2.09, 2H, overlapped                    |
| 20b |                            |                                         |
| 21a | 32.8, $\text{CH}_2$        | 1.85, m                                 |
| 21b |                            | 1.71, m                                 |
| 22  | 53.7, CH                   | 4.32, q (4.4)                           |
| 23  | ND                         |                                         |
| 24  | 25.7, $\text{CH}_3$        | 1.16, s                                 |
| 25  | 16.2, $\text{CH}_3$        | 1.62, s                                 |
| 26  | 16.1, $\text{CH}_3$        | 1.60, s                                 |
| 27  | 16.1, $\text{CH}_3$        | 1.60, s                                 |
| 28  | 16.1, $\text{CH}_3$        | 1.60, s                                 |
| 29  | 173.3, C                   |                                         |
| 30  | 22.4, $\text{CH}_3$        | 1.99, s                                 |

ND: Not detected

**Table S11.** Summary of  $^1\text{H}$  NMR (400 MHz) and  $^{13}\text{C}$  NMR (100 MHz) data for **8** in methanol- $d_4$  ( $\delta$  in ppm,  $J$  in Hz).

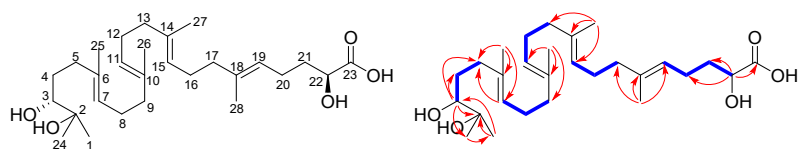

Chemical structure of **8** and  $^1\text{H}$ - $^1\text{H}$  COSY ( — ), and key HMBC correlations ( —→ ).

| No. | $\delta_{\text{C}}$ , type | $\delta_{\text{H}}$ , mult. (J, Hz) |
|-----|----------------------------|-------------------------------------|
| 1   | 25.0, CH <sub>3</sub>      | 1.13, s                             |
| 2   | 73.8, C                    |                                     |
| 3   | 79.1, CH                   | 3.23, dd (10.6, 1.6)                |
| 4a  | 30.9, CH <sub>2</sub>      | 1.71, m                             |
| 4b  |                            | 1.33, m                             |
| 5a  | 37.9, CH <sub>2</sub>      | 2.25, m                             |
| 5b  |                            | 2.00, m                             |
| 6   | 135.8, C                   |                                     |
| 7   | 125.6, CH                  | 5.18, m                             |
| 8a  | 27.8, CH <sub>2</sub>      | 2.09, m                             |
| 8b  |                            | 2.00, overlapped                    |
| 9a  | 40.9, CH <sub>2</sub>      | 2.09, overlapped                    |
| 9b  |                            | 2.00, overlapped                    |
| 10  | 135.9, C                   |                                     |
| 11  | 125.5, CH                  | 5.12, m                             |
| 12a | 27.7, CH <sub>2</sub>      | 2.09, overlapped                    |
| 12b |                            | 2.00, overlapped                    |
| 13a | 40.9, CH <sub>2</sub>      | 2.09, overlapped                    |
| 13b |                            | 2.00, overlapped                    |
| 14  | 136.0, C                   |                                     |
| 15  | 125.4, CH                  | 5.12, overlapped                    |
| 16a | 27.6, CH <sub>2</sub>      | 2.09, overlapped                    |
| 16b |                            | 2.00, overlapped                    |
| 17a | 40.9, CH <sub>2</sub>      | 2.09, overlapped                    |
| 17b |                            | 2.00, overlapped                    |
| 18  | 137.2, C                   |                                     |
| 19  | 124.6, CH                  | 5.15, m                             |
| 20a | 24.6, CH <sub>2</sub>      | 2.14, 2H, m                         |
| 20b |                            |                                     |
| 21a | 35.6, CH <sub>2</sub>      | 1.77, m                             |
| 21b |                            | 1.67, m                             |
| 22  | 70.9, CH                   | 4.09, q (4.1)                       |
| 23  | 178.1, C                   |                                     |
| 24  | 25.6, CH <sub>3</sub>      | 1.16, s                             |
| 25  | 16.1, CH <sub>3</sub>      | 1.62, s                             |
| 26  | 16.1, CH <sub>3</sub>      | 1.61, s                             |
| 27  | 16.1, CH <sub>3</sub>      | 1.61, s                             |
| 28  | 16.2, CH <sub>3</sub>      | 1.63, s                             |

**Table S12.** Summary of  $^1\text{H}$  NMR (400 MHz) and  $^{13}\text{C}$  NMR (100 MHz) data for **9** in methanol- $d_4$  ( $\delta$  in ppm,  $J$  in Hz).

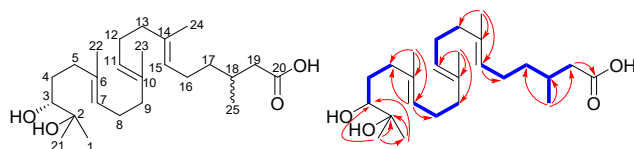

Chemical structure of **9** and  $^1\text{H}$ - $^1\text{H}$  COSY ( — ), and key HMBC correlations ( — ).

| No. | $\delta_{\text{C}}$ , type | $\delta_{\text{H}}$ , mult. (J, Hz) |
|-----|----------------------------|-------------------------------------|
| 1   | 25.2, CH <sub>3</sub>      | 1.13, s                             |
| 2   | 73.9, C                    |                                     |
| 3   | 79.2, CH                   | 3.24, dd (10.5, 1.5)                |
| 4a  | 31.0, CH <sub>2</sub>      | 1.70, m                             |
| 4b  |                            | 1.34, m                             |
| 5a  | 38.1, CH <sub>2</sub>      | 2.27, m                             |
| 5b  |                            | 2.00, m                             |
| 6   | 136.2, C                   |                                     |
| 7   | 125.6, CH                  | 5.18, t (7.0)                       |
| 8a  | 27.9, CH <sub>2</sub>      | 2.09, m                             |
| 8b  |                            | 1.99, m                             |
| 9a  | 41.0, CH <sub>2</sub>      | 2.09, overlapped                    |
| 9b  |                            | 1.99, overlapped                    |
| 10  | 136.1, C                   |                                     |
| 11  | 125.7, CH                  | 5.12, m                             |
| 12a | 27.7, CH <sub>2</sub>      | 2.09, overlapped                    |
| 12b |                            | 2.00, overlapped                    |
| 13a | 41.0, CH <sub>2</sub>      | 2.09, overlapped                    |
| 13b |                            | 1.99, overlapped                    |
| 14  | 136.0, C                   |                                     |
| 15  | 125.7, CH                  | 5.12, overlapped                    |
| 16a | 26.5, CH <sub>2</sub>      | 2.03, 2H, m                         |
| 16b |                            |                                     |
| 17a | 38.0, CH <sub>2</sub>      | 1.37, m                             |
| 17b |                            | 1.24, m                             |
| 18  | 31.3, CH                   | 1.93, m                             |
| 19a | 42.9, CH <sub>2</sub>      | 2.27, overlapped                    |
| 19b |                            | 2.08, overlapped                    |
| 20  | 177.5, C                   |                                     |
| 21  | 25.7, CH <sub>3</sub>      | 1.16, s                             |
| 22  | 16.3, CH <sub>3</sub>      | 1.60, s                             |
| 23  | 16.4, CH <sub>3</sub>      | 1.62, s                             |
| 24  | 16.4, CH <sub>3</sub>      | 1.62, s                             |
| 25  | 20.2, CH <sub>3</sub>      | 0.96, d (6.6)                       |

**Table S13.** Summary of  $^1\text{H}$  NMR (400 MHz) and  $^{13}\text{C}$  NMR (100 MHz) data for **10** in methanol- $d_4$  ( $\delta$  in ppm, J in Hz).

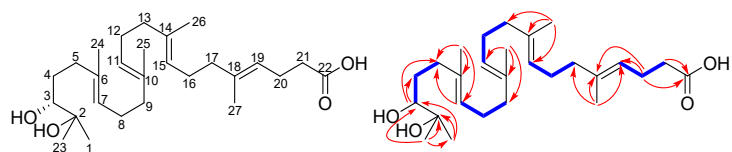

Chemical structure of **10** and  $^1\text{H}$ - $^1\text{H}$  COSY ( — ), and key HMBC correlations ( — ).

| No. | $\delta_{\text{C}}$ , type | $\delta_{\text{H}}$ , mult. (J, Hz) |
|-----|----------------------------|-------------------------------------|
| 1   | 25.0, CH <sub>3</sub>      | 1.13, s                             |
| 2   | 73.8, C                    |                                     |
| 3   | 79.1, CH                   | 3.24, dd (10.6, 1.6)                |
| 4a  | 30.8, CH <sub>2</sub>      | 1.71, m                             |
| 4b  |                            | 1.34, m                             |
| 5a  | 37.9, CH <sub>2</sub>      | 2.24, m                             |
| 5b  |                            | 1.99, m                             |
| 6   | 135.8, C                   |                                     |
| 7   | 125.5, CH                  | 5.18, m                             |
| 8a  | 27.7, CH <sub>2</sub>      | 2.08, m                             |
| 8b  |                            | 1.99, m                             |
| 9a  | 40.9, CH <sub>2</sub>      | 2.08, overlapped                    |
| 9b  |                            | 1.99, overlapped                    |
| 10  | 135.9, C                   |                                     |
| 11  | 125.5, CH                  | 5.11, m                             |
| 12a | 27.6, CH <sub>2</sub>      | 2.08, overlapped                    |
| 12b |                            | 1.99, overlapped                    |
| 13a | 40.8, CH <sub>2</sub>      | 2.08, overlapped                    |
| 13b |                            | 1.99, overlapped                    |
| 14  | 136.0, C                   |                                     |
| 15  | 125.4, CH                  | 5.11, overlapped                    |
| 16a | 27.6, CH <sub>2</sub>      | 2.08, overlapped                    |
| 16b |                            | 1.99, overlapped                    |
| 17a | 40.8, CH <sub>2</sub>      | 2.08, overlapped                    |
| 17b |                            | 1.99, overlapped                    |
| 18  | 137.4, C                   |                                     |
| 19  | 124.0, CH                  | 5.14, overlapped                    |
| 20a | 24.7, CH <sub>2</sub>      | 2.29, 2H, m                         |
| 20b |                            |                                     |
| 21a | 35.5, CH <sub>2</sub>      | 2.29, 2H, overlapped                |
| 21b |                            |                                     |
| 22  | 177.8, C                   |                                     |
| 23  | 25.6, CH <sub>3</sub>      | 1.16, s                             |
| 24  | 16.2, CH <sub>3</sub>      | 1.62, s                             |
| 25  | 16.1, CH <sub>3</sub>      | 1.61, s                             |
| 26  | 16.1, CH <sub>3</sub>      | 1.61, s                             |
| 27  | 16.2, CH <sub>3</sub>      | 1.64, s                             |

**Table S14.** Summary of <sup>1</sup>H NMR (400 MHz) and <sup>13</sup>C NMR (100 MHz) data for **9a**, **9b**, and **9c** in methanol-*d*<sub>4</sub> (δ in ppm, *J* in Hz).

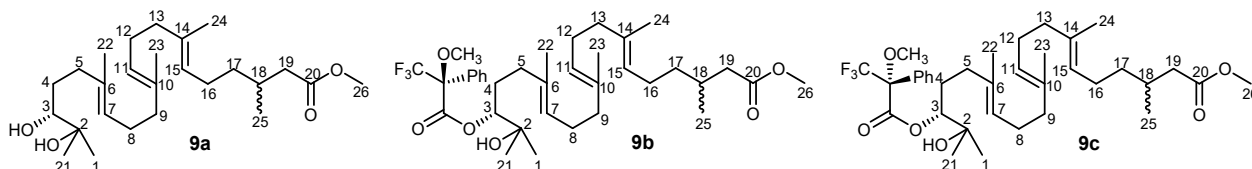

| No. | $\delta_C$ , type     | <b>9a</b><br>$\delta_H$ , mult. ( <i>J</i> , Hz) | $\delta_C$ , type     | <b>9b</b><br>$\delta_H$ , mult. ( <i>J</i> , Hz) | $\delta_C$ , type     | <b>9c</b><br>$\delta_H$ , mult. ( <i>J</i> , Hz) |
|-----|-----------------------|--------------------------------------------------|-----------------------|--------------------------------------------------|-----------------------|--------------------------------------------------|
| 1   | 25.0, CH <sub>3</sub> | 1.13, s                                          | 26.1, CH <sub>3</sub> | 1.08, s                                          | 25.0, CH <sub>3</sub> | 1.16, s                                          |
| 2   | 73.8, C               |                                                  | 72.5, C               |                                                  | 72.7, C               |                                                  |
| 3   | 79.1, CH              | 3.24, dd (10.6, 1.6)                             | 83.4, CH              | 4.99, d (10.6)                                   | 83.3, CH              | 5.02, m                                          |
| 4a  | 30.9, CH <sub>2</sub> | 1.70, m                                          | 30.9, CH <sub>2</sub> | 1.98, m                                          | 30.9, CH <sub>2</sub> | 1.82, m                                          |
| 4b  |                       | 1.34, m                                          |                       | 1.62, m                                          |                       | 1.49, m                                          |
| 5a  | 37.8, CH <sub>2</sub> | 2.25, m                                          | 37.5, CH <sub>2</sub> | 1.99, 2H, m                                      | 37.2, CH <sub>2</sub> | 1.82, 2H, overlapped                             |
| 5b  |                       | 2.01, m                                          |                       |                                                  |                       |                                                  |
| 6   | 136.1, C              |                                                  | 136.1, C              |                                                  | 136.1, C              |                                                  |
| 7   | 125.4, CH             | 5.18, td (7.0, 0.9)                              | 125.5, CH             | 5.12, m                                          | 126.3, CH             | 5.03, m                                          |
| 8a  | 27.8, CH <sub>2</sub> | 2.09, m                                          | 27.8, CH <sub>2</sub> | 2.09, m                                          | 27.6, CH <sub>2</sub> | 2.07, m                                          |
| 8b  |                       | 2.01, overlapped                                 |                       | 2.00, m                                          |                       | 1.99, m                                          |
| 9a  | 40.9, CH <sub>2</sub> | 2.09, overlapped                                 | 40.7, CH <sub>2</sub> | 2.09, 2H, overlapped                             | 40.7, CH <sub>2</sub> | 2.07, 2H, m                                      |
| 9b  |                       | 2.01, overlapped                                 |                       |                                                  |                       |                                                  |
| 10  | 136.0, C              |                                                  | 135.7, C              |                                                  | 135.7, C              |                                                  |
| 11  | 125.5, CH             | 5.11, m                                          | 125.6, CH             | 5.12, overlapped                                 | 125.6, CH             | 5.12, m                                          |
| 12a | 27.6, CH <sub>2</sub> | 2.09, overlapped                                 | 27.6, CH <sub>2</sub> | 2.09, overlapped                                 | 27.6, CH <sub>2</sub> | 2.07, overlapped                                 |
| 12b |                       | 2.01, overlapped                                 |                       | 2.00, overlapped                                 |                       | 1.99, overlapped                                 |
| 13a | 40.9, CH <sub>2</sub> | 2.09, overlapped                                 | 40.9, CH <sub>2</sub> | 1.99, 2H, overlapped                             | 40.9, CH <sub>2</sub> | 1.99, 2H, overlapped                             |
| 13b |                       | 2.01, overlapped                                 |                       |                                                  |                       |                                                  |
| 14  | 135.9, C              |                                                  | 134.9, C              |                                                  | 134.8, C              |                                                  |
| 15  | 125.5, CH             | 5.11, overlapped                                 | 126.4, CH             | 5.12, overlapped                                 | 125.5, CH             | 5.12, overlapped                                 |
| 16a | 26.3, CH <sub>2</sub> | 2.01, 2H, overlapped                             | 26.3, CH <sub>2</sub> | 2.02, 2H, overlapped                             | 26.3, CH <sub>2</sub> | 2.02, 2H, m                                      |
| 16b |                       |                                                  |                       |                                                  |                       |                                                  |
| 17a | 38.0, CH <sub>2</sub> | 1.35, overlapped                                 | 37.8, CH <sub>2</sub> | 1.35, m                                          | 37.8, CH <sub>2</sub> | 1.35, m                                          |
| 17b |                       | 1.24, m                                          |                       | 1.23, m                                          |                       | 1.23, m                                          |
| 18  | 31.2, CH              | 1.93, m                                          | 31.1, CH              | 1.93, m                                          | 31.1, CH              | 1.93, m                                          |
| 19a | 42.3, CH <sub>2</sub> | 2.33, dd (14.8, 6.1)                             | 42.3, CH <sub>2</sub> | 2.32, dd (14.8, 6.1)                             | 42.3, CH <sub>2</sub> | 2.32, dd (14.8, 6.0)                             |
| 19b |                       | 2.14, m                                          |                       | 2.13, m                                          |                       | 2.13, m                                          |
| 20  | 175.4, C              |                                                  | 175.4, C              |                                                  | 175.3, C              |                                                  |
| 21  | 25.6, CH <sub>3</sub> | 1.16, s                                          | 25.2, CH <sub>3</sub> | 1.12, s                                          | 26.3, CH <sub>3</sub> | 1.20, s                                          |
| 22  | 16.1, CH <sub>3</sub> | 1.61, s                                          | 16.0, CH <sub>3</sub> | 1.59, s                                          | 16.0, CH <sub>3</sub> | 1.52, s                                          |
| 23  | 16.2, CH <sub>3</sub> | 1.61, s                                          | 16.1, CH <sub>3</sub> | 1.60, s                                          | 16.1, CH <sub>3</sub> | 1.60, s                                          |
| 24  | 16.2, CH <sub>3</sub> | 1.62, s                                          | 16.1, CH <sub>3</sub> | 1.60, s                                          | 16.1, CH <sub>3</sub> | 1.60, s                                          |
| 25  | 20.0, CH <sub>3</sub> | 0.94, d (6.7)                                    | 20.0, CH <sub>3</sub> | 0.93, d (6.7)                                    | 20.0, CH <sub>3</sub> | 0.93, d (6.7)                                    |
| 26  | 51.9, CH <sub>3</sub> | 3.65, s                                          | 51.9, CH <sub>3</sub> | 3.64, s                                          | 51.9, CH <sub>3</sub> | 3.64, s                                          |

**Table S15.** Summary of <sup>1</sup>H NMR (400 MHz) and <sup>13</sup>C NMR (100 MHz) data for **10b**, **10c**, and **10d** in methanol-*d*<sub>4</sub> (δ in ppm, J in Hz).

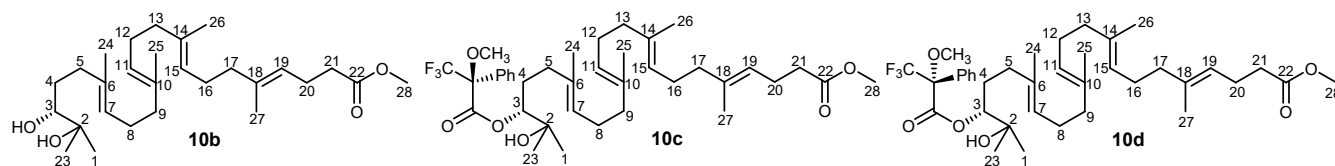

| No. | <sup>10b</sup><br>δ <sub>c</sub> , type | <sup>10b</sup><br>δ <sub>H</sub> , mult. (J, Hz) | <sup>10c</sup><br>δ <sub>c</sub> , type | <sup>10c</sup><br>δ <sub>H</sub> , mult. (J, Hz) | <sup>10d</sup><br>δ <sub>c</sub> , type | <sup>10d</sup><br>δ <sub>H</sub> , mult. (J, Hz) |
|-----|-----------------------------------------|--------------------------------------------------|-----------------------------------------|--------------------------------------------------|-----------------------------------------|--------------------------------------------------|
| 1   | 25.0, CH <sub>3</sub>                   | 1.13, s                                          | 26.1, CH <sub>3</sub>                   | 1.08, s                                          | 26.3, CH <sub>3</sub>                   | 1.16, s                                          |
| 2   | 73.8, C                                 |                                                  | 72.5, C                                 |                                                  | 72.7, C                                 |                                                  |
| 3   | 79.1, CH                                | 3.24, d (10.5)                                   | 83.4, CH                                | 4.99, d (10.0)                                   | 83.3, CH                                | 5.02, m                                          |
| 4a  | 30.9, CH <sub>2</sub>                   | 1.71, m                                          | 29.6, CH <sub>2</sub>                   | 1.93, m                                          | 29.8, CH <sub>2</sub>                   | 1.83, m                                          |
| 4b  |                                         | 1.34, m                                          |                                         | 1.61, m                                          |                                         | 1.48, m                                          |
| 5a  | 38.0, CH <sub>2</sub>                   | 2.25, m                                          |                                         |                                                  |                                         |                                                  |
| 5b  |                                         | 1.99, m                                          | 37.5, CH <sub>2</sub>                   | 1.99, 2H, m                                      | 37.2, CH <sub>2</sub>                   | 1.83, 2H, overlapped                             |
| 6   | 135.9, C                                |                                                  | 134.9, C                                |                                                  | 134.9, C                                |                                                  |
| 7   | 125.5, CH                               | 5.18, t (6.9)                                    | 126.4, CH                               | 5.11, m                                          | 126.3, CH                               | 5.03, m                                          |
| 8a  | 27.8, CH <sub>2</sub>                   | 2.08, m                                          | 27.7, CH <sub>2</sub>                   | 2.08, m                                          | 27.7, CH <sub>2</sub>                   | 2.08, m                                          |
| 8b  |                                         | 1.99, overlapped                                 |                                         | 1.99, m                                          |                                         | 1.99, m                                          |
| 9a  | 40.9, CH <sub>2</sub>                   | 2.08, overlapped                                 | 40.9, CH <sub>2</sub>                   | 2.08, overlapped                                 | 40.9, CH <sub>2</sub>                   | 2.08, overlapped                                 |
| 9b  |                                         | 1.99, overlapped                                 |                                         | 1.99, overlapped                                 |                                         | 1.98, overlapped                                 |
| 10  | 136.0, C                                |                                                  | 135.7, C                                |                                                  | 135.7, C                                |                                                  |
| 11  | 125.5, CH                               | 5.11, m                                          | 125.6, CH                               | 5.11, m                                          | 125.6, CH                               | 5.11, m                                          |
| 12a | 27.7, CH <sub>2</sub>                   | 2.08, overlapped                                 | 27.6, CH <sub>2</sub>                   | 2.08, overlapped                                 | 27.6, CH <sub>2</sub>                   | 2.08, overlapped                                 |
| 12b |                                         | 1.99, overlapped                                 |                                         | 1.99, overlapped                                 |                                         | 1.99, overlapped                                 |
| 13a | 40.9, CH <sub>2</sub>                   | 2.08, overlapped                                 | 40.8, CH <sub>2</sub>                   | 2.08, overlapped                                 | 40.8, CH <sub>2</sub>                   | 2.08, overlapped                                 |
| 13b |                                         | 1.99, overlapped                                 |                                         | 1.99, overlapped                                 |                                         | 1.99, overlapped                                 |
| 14  | 136.1, C                                |                                                  | 136.0, C                                |                                                  | 136.0, C                                |                                                  |
| 15  | 125.5, CH                               | 5.11, overlapped                                 | 125.3, CH                               | 5.11, overlapped                                 | 125.3, CH                               | 5.11, overlapped                                 |
| 16a | 27.5, CH <sub>2</sub>                   | 2.08, overlapped                                 | 27.5, CH <sub>2</sub>                   | 2.08, overlapped                                 | 27.5, CH <sub>2</sub>                   | 2.08, overlapped                                 |
| 16b |                                         | 1.99, overlapped                                 |                                         | 1.99, overlapped                                 |                                         | 1.99, overlapped                                 |
| 17a | 40.8, CH <sub>2</sub>                   | 2.08, overlapped                                 | 40.7, CH <sub>2</sub>                   | 2.08, overlapped                                 | 40.7, CH <sub>2</sub>                   | 2.08, overlapped                                 |
| 17b |                                         | 1.99, overlapped                                 |                                         | 1.99, overlapped                                 |                                         | 1.99, overlapped                                 |
| 18  | 137.6, C                                |                                                  | 137.7, C                                |                                                  | 137.7, C                                |                                                  |
| 19  | 123.7, CH                               | 5.11, overlapped                                 | 123.7, CH                               | 5.11, overlapped                                 | 123.7, CH                               | 5.11, overlapped                                 |
| 20a | 24.5, CH <sub>2</sub>                   | 2.29, 2H, m                                      | 24.5, CH <sub>2</sub>                   | 2.31, 2H, m                                      | 24.5, CH <sub>2</sub>                   | 2.32, 2H, m                                      |
| 20b |                                         |                                                  |                                         |                                                  |                                         |                                                  |
| 21a | 35.1, CH <sub>2</sub>                   | 2.29, 2H, overlapped                             | 35.1, CH <sub>2</sub>                   | 2.31, 2H, overlapped                             | 35.1, CH <sub>2</sub>                   | 2.32, 2H, overlapped                             |
| 21b |                                         |                                                  |                                         |                                                  |                                         |                                                  |
| 22  | 175.5, C                                |                                                  | 175.5, C                                |                                                  | 175.5, C                                |                                                  |
| 23  | 25.6, CH <sub>3</sub>                   | 1.16, s                                          | 25.2, CH <sub>3</sub>                   | 1.12, s                                          | 25.1, CH <sub>3</sub>                   | 1.20, s                                          |
| 24  | 16.2, CH <sub>3</sub>                   | 1.62, s                                          | 16.1, CH <sub>3</sub>                   | 1.60, s                                          | 16.1, CH <sub>3</sub>                   | 1.52, s                                          |
| 25  | 16.1, CH <sub>3</sub>                   | 1.60, s                                          | 16.1, CH <sub>3</sub>                   | 1.59, s                                          | 16.1, CH <sub>3</sub>                   | 1.60, s                                          |
| 26  | 16.1, CH <sub>3</sub>                   | 1.60, s                                          | 16.0, CH <sub>3</sub>                   | 1.59, s                                          | 16.0, CH <sub>3</sub>                   | 1.60, s                                          |
| 27  | 16.2, CH <sub>3</sub>                   | 1.63, s                                          | 16.1, CH <sub>3</sub>                   | 1.62, s                                          | 16.1, CH <sub>3</sub>                   | 1.63, s                                          |
| 28  | 52.0, CH <sub>3</sub>                   | 3.65, s                                          | 52.0, CH <sub>3</sub>                   | 3.64, s                                          | 52.0, CH <sub>3</sub>                   | 3.64, s                                          |

**Table S16.** Summary of  $^1\text{H}$  NMR (400 MHz) and  $^{13}\text{C}$  NMR (100 MHz) data for atolypene E (**11**) in methanol- $d_4$  ( $\delta$  in ppm,  $J$  in Hz).

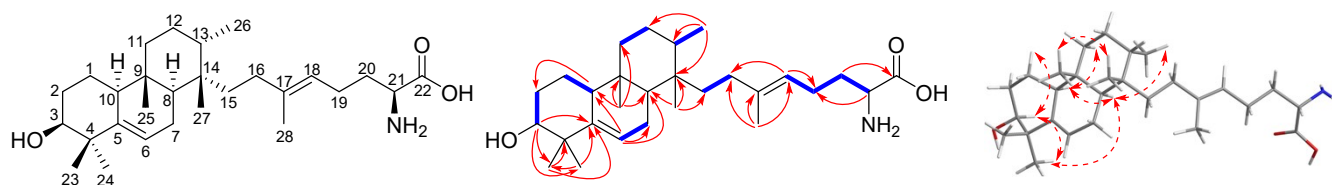

Chemical structure of **11** and  $^1\text{H}$ - $^1\text{H}$  COSY (—), key HMBC correlations (—), and key ROESY correlations (---).

| No. | $\delta_{\text{C}}$ , type | $\delta_{\text{H}}$ , mult. ( $J$ , Hz) |
|-----|----------------------------|-----------------------------------------|
| 1a  | 19.7, CH <sub>2</sub>      | 1.62, m                                 |
| 1b  |                            | 1.47, m                                 |
| 2a  | 29.4, CH <sub>2</sub>      | 1.86, m                                 |
| 2b  |                            | 1.66, m                                 |
| 3   | 77.0, CH                   | 3.44, t (2.7)                           |
| 4   | 41.4, C                    |                                         |
| 5   | 143.7, C                   |                                         |
| 6   | 121.1, CH                  | 5.57, br s                              |
| 7a  | 24.5, CH <sub>2</sub>      | 1.93, 2H, m                             |
| 7b  |                            |                                         |
| 8   | 45.9, CH                   | 1.28, m                                 |
| 9   | 37.0, C                    |                                         |
| 10  | 51.0, CH                   | 2.02, m                                 |
| 11a | 34.0, CH <sub>2</sub>      | 1.55, m                                 |
| 11b |                            | 1.41, m                                 |
| 12a | 26.5, CH <sub>2</sub>      | 1.93, overlapped                        |
| 12b |                            | 1.30, m                                 |
| 13  | 36.3, CH                   | 1.64, overlapped                        |
| 14  | 38.0, C                    |                                         |
| 15a | 39.8, CH <sub>2</sub>      | 1.49, overlapped                        |
| 15b |                            | 1.10, m                                 |
| 16a | 33.7, CH <sub>2</sub>      | 1.93, 2H, overlapped                    |
| 16b |                            |                                         |
| 17  | 139.2, C                   |                                         |
| 18  | 123.3, CH                  | 5.12, t (6.4)                           |
| 19a | 24.8, CH <sub>2</sub>      | 2.13, 2H, m                             |
| 19b |                            |                                         |
| 20a | 32.6, CH <sub>2</sub>      | 1.99, m                                 |
| 20b |                            | 1.81, m                                 |
| 21  | 56.0, CH                   | 3.53, m                                 |
| 22  | 173.1, C                   |                                         |
| 23  | 29.8, CH <sub>3</sub>      | 1.02, s                                 |
| 24  | 26.0, CH <sub>3</sub>      | 1.12, s                                 |
| 25  | 16.3, CH <sub>3</sub>      | 0.92, s                                 |
| 26  | 14.8, CH <sub>3</sub>      | 0.95, d (7.1)                           |
| 27  | 21.5, CH <sub>3</sub>      | 1.02, s                                 |
| 28  | 16.4, CH <sub>3</sub>      | 1.65, s                                 |

**Table S17.** Summary of  $^1\text{H}$  NMR (400 MHz) and  $^{13}\text{C}$  NMR (100 MHz) data for atolypene F (**12**) in methanol- $d_4$  ( $\delta$  in ppm,  $J$  in Hz).

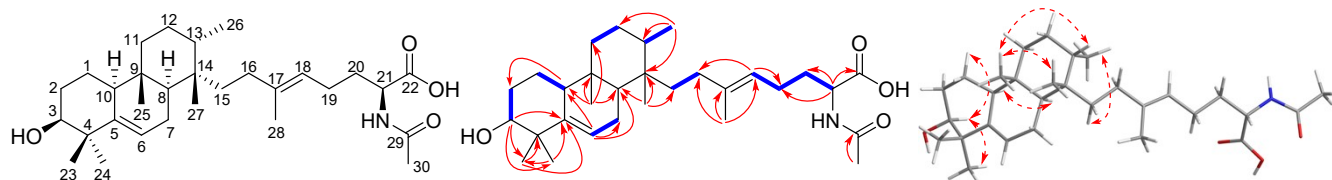

Chemical structure of **12** and  $^1\text{H}$ - $^1\text{H}$  COSY (—), key HMBC correlations (—), and key ROESY correlations (---).

| No. | $\delta_{\text{C}}$ , type | $\delta_{\text{H}}$ , mult. ( $J$ , Hz) |
|-----|----------------------------|-----------------------------------------|
| 1a  | 19.7, $\text{CH}_2$        | 1.62, m                                 |
| 1b  |                            | 1.47, m                                 |
| 2a  | 29.3, $\text{CH}_2$        | 1.89, m                                 |
| 2b  |                            | 1.67, m                                 |
| 3   | 77.0, CH                   | 3.44, t (2.6)                           |
| 4   | 41.4, C                    |                                         |
| 5   | 143.6, C                   |                                         |
| 6   | 121.7, CH                  | 5.58, br s                              |
| 7a  | 24.5, $\text{CH}_2$        | 1.93, 2H, m                             |
| 7b  |                            |                                         |
| 8   | 45.9, CH                   | 1.46, overlapped                        |
| 9   | 37.0, C                    |                                         |
| 10  | 50.9, CH                   | 2.01, m                                 |
| 11a | 34.0, $\text{CH}_2$        | 1.55, m                                 |
| 11b |                            | 1.40, m                                 |
| 12a | 26.5, $\text{CH}_2$        | 1.93, m                                 |
| 12b |                            | 1.30, m                                 |
| 13  | 36.3, CH                   | 1.63, overlapped                        |
| 14  | 38.1, C                    |                                         |
| 15a | 39.8, $\text{CH}_2$        | 1.48, overlapped                        |
| 15b |                            | 1.13, m                                 |
| 16a | 33.9, $\text{CH}_2$        | 1.93, 2H, overlapped                    |
| 16b |                            |                                         |
| 17  | 139.0, C                   |                                         |
| 18  | 123.3, CH                  | 5.13, t (7.2)                           |
| 19a | 25.3, $\text{CH}_2$        | 2.09, 2H, m                             |
| 19b |                            |                                         |
| 20a | 32.7, $\text{CH}_2$        | 1.85, overlapped                        |
| 20b |                            | 1.71, m                                 |
| 21  | 53.4, CH                   | 4.32, q (4.6)                           |
| 22  | 175.9, C                   |                                         |
| 23  | 29.8, $\text{CH}_3$        | 1.02, s                                 |
| 24  | 26.0, $\text{CH}_3$        | 1.12, s                                 |
| 25  | 16.3, $\text{CH}_3$        | 0.92, s                                 |
| 26  | 14.8, $\text{CH}_3$        | 0.96, d (7.1)                           |
| 27  | 21.5, $\text{CH}_3$        | 1.02, s                                 |
| 28  | 16.3, $\text{CH}_3$        | 1.60, s                                 |
| 29  | 173.4, C                   |                                         |
| 30  | 22.4, $\text{CH}_3$        | 1.99, s                                 |



**Table S18.** Summary of  $^1\text{H}$  NMR (400 MHz) and  $^{13}\text{C}$  NMR (100 MHz) data for atolypene G (**13**) in methanol- $d_4$  ( $\delta$  in ppm,  $J$  in Hz).

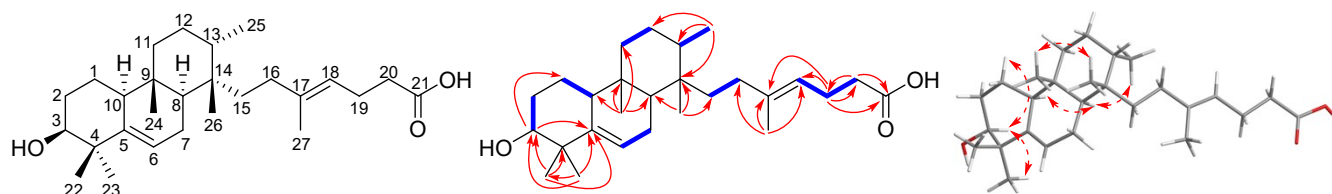

Chemical structure of **13** and  $^1\text{H}$ - $^1\text{H}$  COSY (—), key HMBC correlations (—), and key ROESY correlations (---).

| No. | $\delta_{\text{C}}$ , type | $\delta_{\text{H}}$ , mult. (J, Hz) |
|-----|----------------------------|-------------------------------------|
| 1a  | 19.7, CH <sub>2</sub>      | 1.62, m                             |
| 1b  |                            | 1.47, m                             |
| 2a  | 29.4, CH <sub>2</sub>      | 1.90, m                             |
| 2b  |                            | 1.67, overlapped                    |
| 3   | 77.0, CH                   | 3.44, t (2.7)                       |
| 4   | 41.4, C                    |                                     |
| 5   | 143.7, C                   |                                     |
| 6   | 121.1, CH                  | 5.57, br s                          |
| 7a  | 24.5, CH <sub>2</sub>      | 1.92, 2H, m                         |
| 7b  |                            |                                     |
| 8   | 45.9, CH                   | 1.29, m                             |
| 9   | 37.0, C                    |                                     |
| 10  | 51.0, CH                   | 2.01, m                             |
| 11a | 34.0, CH <sub>2</sub>      | 1.55, m                             |
| 11b |                            | 1.40, m                             |
| 12a | 26.5, CH <sub>2</sub>      | 1.93, overlapped                    |
| 12b |                            | 1.30, m                             |
| 13  | 36.3, CH                   | 1.64, overlapped                    |
| 14  | 38.0, C                    |                                     |
| 15a | 39.8, CH <sub>2</sub>      | 1.47, overlapped                    |
| 15b |                            | 1.09, m                             |
| 16a | 33.8, CH <sub>2</sub>      | 1.92, 2H, overlapped                |
| 16b |                            |                                     |
| 17  | 138.8, C                   |                                     |
| 18  | 123.2, CH                  | 5.14, t (6.6)                       |
| 19a | 24.7, CH <sub>2</sub>      | 2.29, 2H, m                         |
| 19b |                            |                                     |
| 20a | 35.4, CH <sub>2</sub>      | 2.29, 2H, overlapped                |
| 20b |                            |                                     |
| 21  | 177.6, C                   |                                     |
| 22  | 29.8, CH <sub>3</sub>      | 1.02, s                             |
| 23  | 26.0, CH <sub>3</sub>      | 1.12, s                             |
| 24  | 16.3, CH <sub>3</sub>      | 0.92, s                             |
| 25  | 14.8, CH <sub>3</sub>      | 0.95, d (7.1)                       |
| 26  | 21.5, CH <sub>3</sub>      | 1.02, s                             |
| 27  | 16.5, CH <sub>3</sub>      | 1.64, s                             |

**Table S19.** Summary of  $^1\text{H}$  NMR (400 MHz) and  $^{13}\text{C}$  NMR (100 MHz) data for **14** in methanol- $d_4$  ( $\delta$  in ppm, J in Hz).

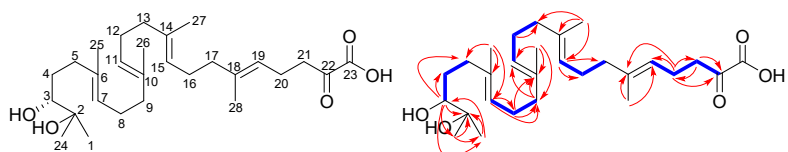

Chemical structure of **14** and  $^1\text{H}$ - $^1\text{H}$  COSY ( — ), and key HMBC correlations ( — ).

| No. | $\delta_{\text{C}}$ , type | $\delta_{\text{H}}$ , mult. (J, Hz) |
|-----|----------------------------|-------------------------------------|
| 1   | 25.0, CH <sub>3</sub>      | 1.13, s                             |
| 2   | 73.8, C                    |                                     |
| 3   | 79.1, CH                   | 3.24, dd (10.6, 1.6)                |
| 4a  | 30.9, CH <sub>2</sub>      | 1.71, m                             |
| 4b  |                            | 1.33, m                             |
| 5a  | 37.9, CH <sub>2</sub>      | 2.27, m                             |
| 5b  |                            | 1.99, m                             |
| 6   | 135.8, C                   |                                     |
| 7   | 125.6, CH                  | 5.18, m                             |
| 8a  | 27.6, CH <sub>2</sub>      | 2.08, m                             |
| 8b  |                            | 1.99, m                             |
| 9a  | 40.8, CH <sub>2</sub>      | 1.99, 2H, overlapped                |
| 9b  |                            |                                     |
| 10  | 135.9, C                   |                                     |
| 11  | 125.5, CH                  | 5.11, m                             |
| 12a | 27.7, CH <sub>2</sub>      | 2.08, overlapped                    |
| 12b |                            | 1.99, overlapped                    |
| 13a | 40.9, CH <sub>2</sub>      | 1.99, 2H, overlapped                |
| 13b |                            |                                     |
| 14  | 135.9, C                   |                                     |
| 15  | 125.5, CH                  | 5.11, overlapped                    |
| 16a | 27.8, CH <sub>2</sub>      | 2.08, 2H, overlapped                |
| 16b |                            |                                     |
| 17a | 40.9, CH <sub>2</sub>      | 1.99, 2H, overlapped                |
| 17b |                            |                                     |
| 18  | 137.0, C                   |                                     |
| 19  | 124.2, CH                  | 5.16, overlapped                    |
| 20a | 22.9, CH <sub>2</sub>      | 2.71, t (7.4)                       |
| 20b |                            | 2.28, overlapped                    |
| 21a | 40.7, CH <sub>2</sub>      | 2.71, overlapped                    |
| 21b |                            | 2.08, overlapped                    |
| 22  | 206.0, C                   |                                     |
| 23  | ND                         |                                     |
| 24  | 25.6, CH <sub>3</sub>      | 1.16, s                             |
| 25  | 16.1, CH <sub>3</sub>      | 1.62, s                             |
| 26  | 16.1, CH <sub>3</sub>      | 1.60, overlapped                    |
| 27  | 16.1, CH <sub>3</sub>      | 1.60, overlapped                    |
| 28  | 16.2, CH <sub>3</sub>      | 1.63, s                             |

ND: Not detected

**Table S20.** Summary of  $^1\text{H}$  NMR (400 MHz) and  $^{13}\text{C}$  NMR (100 MHz) data for **10e** in methanol- $d_4$  ( $\delta$  in ppm,  $J$  in Hz).

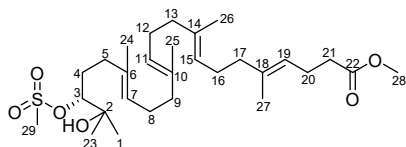

| No. | $\delta_{\text{C}}$ , type | $\delta_{\text{H}}$ , mult. (J, Hz) |
|-----|----------------------------|-------------------------------------|
| 1   | 24.5, CH <sub>3</sub>      | 1.21, s                             |
| 2   | 72.9, C                    |                                     |
| 3   | 91.2, CH                   | 4.47, dd (9.7, 2.3)                 |
| 4a  | 30.5, CH <sub>2</sub>      | 1.80, m                             |
| 4b  |                            | 1.32, m                             |
| 5a  | 37.2, CH <sub>2</sub>      | 2.22, m                             |
| 5b  |                            | 2.00, m                             |
| 6   | 135.9, C                   |                                     |
| 7   | 125.5, CH                  | 5.21, t (6.7)                       |
| 8a  | 27.7, CH <sub>2</sub>      | 2.08, m                             |
| 8b  |                            | 2.00, overlapped                    |
| 9a  | 40.9, CH <sub>2</sub>      | 2.08, overlapped                    |
| 9b  |                            | 2.00, overlapped                    |
| 10  | 136.0, C                   |                                     |
| 11  | 125.5, CH                  | 5.11, m                             |
| 12a | 27.7, CH <sub>2</sub>      | 2.08, overlapped                    |
| 12b |                            | 2.00, overlapped                    |
| 13a | 40.8, CH <sub>2</sub>      | 2.08, overlapped                    |
| 13b |                            | 2.00, overlapped                    |
| 14  | 136.1, C                   |                                     |
| 15  | 125.5, CH                  | 5.11, overlapped                    |
| 16a | 27.5, CH <sub>2</sub>      | 2.08, overlapped                    |
| 16b |                            | 2.00, overlapped                    |
| 17a | 40.7, CH <sub>2</sub>      | 2.08, overlapped                    |
| 17b |                            | 2.00, overlapped                    |
| 18  | 137.6, C                   |                                     |
| 19  | 123.7, CH                  | 5.11, overlapped                    |
| 20a | 24.7, CH <sub>2</sub>      | 2.32, 2H, m                         |
| 20b |                            |                                     |
| 21a | 35.1, CH <sub>2</sub>      | 2.32, 2H, overlapped                |
| 21b |                            |                                     |
| 22  | 175.5, C                   |                                     |
| 23  | 26.8, CH <sub>3</sub>      | 1.22, s                             |
| 24  | 16.2, CH <sub>3</sub>      | 1.62, s                             |
| 25  | 16.1, CH <sub>3</sub>      | 1.60, s                             |
| 26  | 16.1, CH <sub>3</sub>      | 1.60, s                             |
| 27  | 16.1, CH <sub>3</sub>      | 1.63, s                             |
| 28  | 52.0, CH <sub>3</sub>      | 3.65, s                             |
| 29  | 39.1, CH <sub>3</sub>      | 3.14, s                             |

**Table S21.** Summary of  $^1\text{H}$  NMR (400 MHz) and  $^{13}\text{C}$  NMR (100 MHz) data for **10a** in methanol- $d_4$  ( $\delta$  in ppm,  $J$  in Hz).

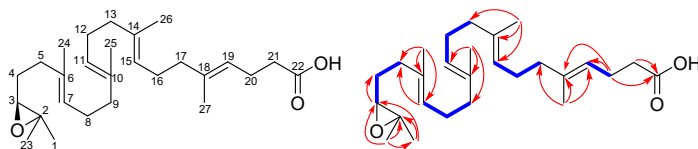

Chemical structure of **10a** and  $^1\text{H}$ - $^1\text{H}$  COSY (—) and key HMBC correlations (—).

| No. | $\delta_{\text{C}}$ , type | $\delta_{\text{H}}$ , mult. (J, Hz) |
|-----|----------------------------|-------------------------------------|
| 1   | 18.9, CH <sub>3</sub>      | 1.26, s                             |
| 2   | 60.2, C                    |                                     |
| 3   | 65.8, CH                   | 2.75, t (6.3)                       |
| 4a  | 28.5, CH <sub>2</sub>      | 1.61, 2H, m                         |
| 4b  |                            |                                     |
| 5a  | 37.4, CH <sub>2</sub>      | 2.12, 2H, m                         |
| 5b  |                            |                                     |
| 6   | 135.1, C                   |                                     |
| 7   | 126.1, CH                  | 5.18, t (6.9)                       |
| 8a  | 27.6, CH <sub>2</sub>      | 2.10, m                             |
| 8b  |                            | 2.00, m                             |
| 9a  | 40.8, CH <sub>2</sub>      | 2.10, overlapped                    |
| 9b  |                            | 2.00, overlapped                    |
| 10  | 135.9, C                   |                                     |
| 11  | 125.4, CH                  | 5.11, m                             |
| 12a | 27.6, CH <sub>2</sub>      | 2.10, overlapped                    |
| 12b |                            | 2.00, overlapped                    |
| 13a | 40.8, CH <sub>2</sub>      | 2.10, overlapped                    |
| 13b |                            | 2.00, overlapped                    |
| 14  | 135.7, C                   |                                     |
| 15  | 125.6, CH                  | 5.11, overlapped                    |
| 16a | 27.6, CH <sub>2</sub>      | 2.10, overlapped                    |
| 16b |                            | 2.00, overlapped                    |
| 17a | 40.8, CH <sub>2</sub>      | 2.10, overlapped                    |
| 17b |                            | 2.00, overlapped                    |
| 18  | 137.4, C                   |                                     |
| 19  | 124.0, CH                  | 5.14, m                             |
| 20a | 24.7, CH <sub>2</sub>      | 2.29, 2H, m                         |
| 20b |                            |                                     |
| 21a | 35.4, CH <sub>2</sub>      | 2.29, 2H, overlapped                |
| 21b |                            |                                     |
| 22  | 177.1, C                   |                                     |
| 23  | 25.1, CH <sub>3</sub>      | 1.28, s                             |
| 24  | 16.1, CH <sub>3</sub>      | 1.63, s                             |
| 25  | 16.1, CH <sub>3</sub>      | 1.60, s                             |
| 26  | 16.1, CH <sub>3</sub>      | 1.60, s                             |
| 27  | 16.1, CH <sub>3</sub>      | 1.63, s                             |

**Table S22.** AtoE-like MTCs used for phylogenetic analysis.<sup>a</sup>

| Protein | Strain                                         | UniProt ID | Length (AA) | Clade |
|---------|------------------------------------------------|------------|-------------|-------|
| AtoE    | <i>Amycolatopsis tolypomycina</i> NRRL B-24205 | A0A1H4ZTV5 | 534         | III   |
| Bra4    | <i>Nocardia brasiliensis</i>                   | B1Q2P4     | 556         | IV    |
| PlaT2   | <i>Streptomyces</i> sp. Tü6071                 | Q2I762     | 571         | VI    |
| TnIT2   | <i>Streptomyces</i> sp. CB03234                | A0A1Q5LS56 | 604         | VI    |
| TnIT2   | <i>Streptomyces</i> sp. CB03238                | A0A1X1NCL8 | 584         | VI    |
| Lon15   | <i>Streptomyces argenteolus</i> A2             | A9ZNV5     | 545         | VII   |
|         | <i>Actinobacteria bacterium</i> OK074          | A0A0N0MUW6 | 555         | I     |
|         | <i>Actinokineospora bangkokensis</i>           | A0A1Q9LNM5 | 551         | I     |
|         | <i>Actinosynnema mirum</i> ATCC 29888          | C6WK21     | 560         | I     |
|         | <i>Actinosynnema pretiosum</i>                 | A0A290Z9G3 | 560         | I     |
|         | <i>Amycolatopsis panacis</i>                   | A0A419HYZ8 | 555         | I     |
|         | <i>Amycolatopsis</i> sp. WAC 04169             | A0A429C6Z9 | 554         | I     |
|         | <i>Amycolatopsis sulphurea</i>                 | A0A2A9G0G6 | 555         | I     |
|         | <i>Amycolatopsis thailandensis</i>             | A0A229S526 | 554         | I     |
|         | <i>Lentzea fradiae</i>                         | A0A1G7K5R4 | 555         | I     |
|         | <i>Lentzea xinjiangensis</i>                   | A0A1H9UYX0 | 555         | I     |
|         | <i>Nocardia</i> sp. NRRL S-836                 | A0A0M8WFT9 | 555         | I     |
|         | <i>Pseudonocardia</i> sp. Ae706_Ps2            | A0A1Q8LD59 | 558         | I     |
|         | <i>Pseudonocardia</i> sp. Ae717_Ps2            | A0A1Q8LWS8 | 558         | I     |
|         | <i>Pseudonocardia</i> sp. EV170527-09          | A0A5B0HY15 | 558         | I     |
|         | <i>Pseudonocardia</i> sp. HH130630-07          | A0A1B1ZIR2 | 558         | I     |
|         | <i>Saccharopolyspora dendranthema</i>          | A0A561V877 | 566         | I     |
|         | <i>Saccharopolyspora elongata</i>              | A0A4R4ZCL0 | 558         | I     |
|         | <i>Saccharopolyspora erythraea</i>             | A4FIP2     | 553         | I     |
|         | <i>Saccharopolyspora karakumensis</i>          | A0A4R5BC21 | 554         | I     |
|         | <i>Saccharopolyspora kobensis</i>              | A0A1H6ACW3 | 558         | I     |
|         | <i>Saccharopolyspora shandongensis</i>         | A0A1H3R7G8 | 558         | I     |
|         | <i>Saccharopolyspora</i> sp. ASAGF58           | A0A6H1RFA4 | 553         | I     |
|         | <i>Saccharopolyspora spinosa</i>               | A0A2N3Y4X7 | 553         | I     |
|         | <i>Saccharopolyspora terrae</i>                | A0A4R4VEZ1 | 554         | I     |
|         | <i>Umezawaea tangerina</i>                     | A0A2T0STH2 | 563         | I     |
|         | <i>Streptomyces griseoaurantiacus</i>          | A0A7W2DXP5 | 546         | II    |
|         | <i>Streptomyces griseoaurantiacus</i> M045     | F3NDC3     | 503         | II    |
|         | <i>Streptomyces jietaisiensis</i>              | A0A1G7VIK1 | 594         | II    |
|         | <i>Streptomyces</i> sp. WAC 01420              | A0A429AHL0 | 546         | II    |
|         | <i>Streptomyces</i> sp. WAC 01438              | A0A3Q8VBC2 | 546         | II    |
|         | <i>Streptomyces antimycoticus</i>              | A0A499UX71 | 581         | III   |
|         | <i>Streptomyces autolyticus</i>                | A0A1P8XPB9 | 574         | III   |
|         | <i>Streptomyces hygrosopicus</i>               | A0A1S6R8W9 | 587         | III   |
|         | <i>Streptomyces iranensis</i>                  | A0A061A395 | 715         | III   |
|         | <i>Streptomyces malaysiensis</i>               | A0A515GD19 | 575         | III   |
|         | <i>Streptomyces melanosporofaciens</i>         | A0A1H5BU00 | 568         | III   |
|         | <i>Streptomyces rapamycinicus</i> ATCC 29253   | A0A3L8QYP9 | 594         | III   |
|         | <i>Streptomyces</i> sp. 11-1-2                 | A0A222SNY9 | 587         | III   |
|         | <i>Streptomyces</i> sp. Amel2xB2               | A0A327UPB0 | 618         | III   |
|         | <i>Streptomyces</i> sp. M56                    | A0A2K8RH60 | 574         | III   |
|         | <i>Streptomyces</i> sp. PRh5                   | A0A014LBY2 | 640         | III   |
|         | <i>Streptomyces</i> sp. Z26                    | A0A498DR72 | 595         | III   |
|         | <i>Streptomyces violaceusniger</i>             | A0A4D4KW08 | 582         | III   |
|         | <i>Streptomyces violaceusniger</i> Tü4113      | G2P3W2     | 587         | III   |
|         | <i>Streptomycetaceae bacterium</i> MP113-05    | V6L1S5     | 477         | III   |
|         | <i>Nocardia arthritidis</i>                    | A0A6G9YGF3 | 553         | IV    |
|         | <i>Nocardia terpenica</i>                      | A0A164MNL0 | 556         | IV    |

|                                            |                            |                     |                     |
|--------------------------------------------|----------------------------|---------------------|---------------------|
| <i>Nocardia terpenica</i>                  | A0A291RHW6                 | 556                 | IV                  |
| <i>Nocardia terpenica</i>                  | A0A6G9Z1W4                 | 556                 | IV                  |
| <i>Actinoplanes derwentensis</i>           | A0A1H1W8Y1                 | 557                 | V                   |
| <i>Labedaea rhizosphaerae</i>              | A0A4R6S0L8                 | 567                 | V                   |
| <i>Micromonospora aurantiaca</i> DSM 43813 | D9SZA3                     | 566                 | V                   |
| <i>Micromonospora ferruginea</i>           | A0A7L6B3A3                 | 566                 | V                   |
| <i>Micromonospora humi</i>                 | A0A1C5GJ27                 | 566                 | V                   |
| <i>Micromonospora marina</i>               | A0A1C4VJH9                 | 566                 | V                   |
| <i>Micromonospora matsumotoense</i>        | A0A1C5AJ72                 | 566                 | V                   |
| <i>Micromonospora mirobrigensis</i>        | A0A1C4WX72                 | 566                 | V                   |
| <i>Micromonospora pisi</i>                 | A0A495JV02                 | 559                 | V                   |
| <i>Micromonospora polyrhachis</i>          | A0A7W7WMV2                 | 556                 | V                   |
| <i>Micromonospora rifamycinica</i>         | A0A109IME3                 | 566                 | V                   |
| <i>Micromonospora</i> sp. AMSO1212t        | A0A6H9XDP7                 | 566                 | V                   |
| <i>Micromonospora</i> sp. B006             | A0A385AT49                 | 566                 | V                   |
| <i>Micromonospora</i> sp. HM134            | A0A518WDL6                 | 566                 | V                   |
| <i>Micromonospora</i> sp. M42              | W7VR86                     | 565                 | V                   |
| <i>Micromonospora</i> sp. RP3T             | A0A2T3VPR7                 | 566                 | V                   |
| <i>Micromonospora</i> sp. TSRI0369         | A0A1Q5HKX0                 | 566                 | V                   |
| <i>Micromonospora</i> sp. XM-20-01         | A0A505HSM1                 | 566                 | V                   |
| <i>Micromonospora tulbaghiae</i>           | A0A1C4UU69                 | 566                 | V                   |
| <i>Micromonospora wenchangensis</i>        | A0A246RSK5                 | 566                 | V                   |
| <i>Saccharothrix</i> sp. NRRL B-16348      | A0A0M8Y906                 | 552                 | V                   |
| <i>Saccharothrix syringae</i>              | <a href="#">A0A5Q0H4Q7</a> | <a href="#">566</a> | <a href="#">V</a>   |
| <i>Saccharothrix texasensis</i>            | A0A3N1HHK0                 | 552                 | V                   |
| <i>Actinomadura litoris</i>                | A0A7K1KVG6                 | 572                 | VI                  |
| <i>Frankia</i> sp. KB5                     | A0A1X1MKK4                 | 571                 | VI                  |
| <i>Saccharopolyspora antimicrobica</i>     | A0A1I5KZN7                 | 558                 | VI                  |
| <i>Saccharopolyspora elongata</i>          | A0A4R4Y7E8                 | 588                 | VI                  |
| <i>Streptacidiphilus jiangxiensis</i>      | A0A1H7KKC5                 | 584                 | VI                  |
| <i>Streptomyces broussonetiae</i>          | A0A6I6MUP5                 | 571                 | VI                  |
| <i>Streptomyces harbinensis</i>            | A0A1I6VN40                 | 562                 | VI                  |
| <i>Streptomyces olivaceus</i>              | A0A1D8SWY0                 | 571                 | VI                  |
| <i>Streptomyces paludis</i>                | A0A345HS54                 | 552                 | VI                  |
| <i>Streptomyces xiamenensis</i>            | A0A0F7G043                 | 567                 | VI                  |
| <i>Alloactinosynnema</i> sp. L-07          | A0A0H5DAM2                 | 536                 | VII                 |
| <i>Amycolatopsis coloradensis</i>          | A0A1R0KUQ2                 | 572                 | VII                 |
| <i>Amycolatopsis xylanica</i>              | <a href="#">A0A1H3CQ58</a> | <a href="#">546</a> | <a href="#">VII</a> |
| <i>Crossiella cryophila</i>                | <a href="#">A0A7W7FUZ7</a> | <a href="#">564</a> | <a href="#">VII</a> |
| <i>Kibdelosporangium aridum</i>            | A0A428ZRL1                 | 645                 | VII                 |
| <i>Kitasatospora viridis</i>               | A0A561UCI7                 | 619                 | VII                 |
| <i>Nonomurea terrae</i>                    | A0A4R4ZAM5                 | 569                 | VII                 |
| <i>Prauserella shujinwangii</i>            | <a href="#">A0A2T0LSJ8</a> | <a href="#">554</a> | <a href="#">VII</a> |
| <i>Saccharomonospora xinjiangensis</i>     | A0A4P7CC09                 | 568                 | VII                 |
| <i>Saccharopolyspora</i> sp. ASAGF58       | A0A6H1R8U3                 | 570                 | VII                 |
| <i>Sphaerisporangium rubeum</i>            | A0A7X0M9R3                 | 561                 | VII                 |
| <i>Streptomyces sporangiiformans</i>       | A0A505CX34                 | 583                 | VII                 |
| <i>Amycolatopsis antarctica</i>            | A0A263D1Y7                 | 557                 |                     |
| <i>Saccharopolyspora gloriosae</i>         | A0A840N7M9                 | 571                 |                     |
| <i>Streptomyces</i> sp. SN-593             | A0A7U3UW44                 | 571                 |                     |

<sup>a</sup> The proteins AtoE (Uniprot ID: A0A1H4ZTV5), SerTC (Uniprot ID: A4FIP2), SmaTC (Uniprot ID: A0A515GD19), UtaTC (Uniprot ID: A0A2T0STH2), CcrTC (Uniprot ID: A0A7W7FUZ7), SsyTC (Uniprot ID: A0A5Q0H4Q7), AxyTC (Uniprot ID: A0A1H3CQ58) and PshTC (Uniprot ID: A0A2T0LSJ8), which were characterized in this study, are highlighted in blue text.

**Table S23.** Summary of  $^1\text{H}$  NMR (400 MHz) and  $^{13}\text{C}$  NMR (100 MHz) data for atolypene H (**15**) in methanol- $d_4$  ( $\delta$  in ppm,  $J$  in Hz).

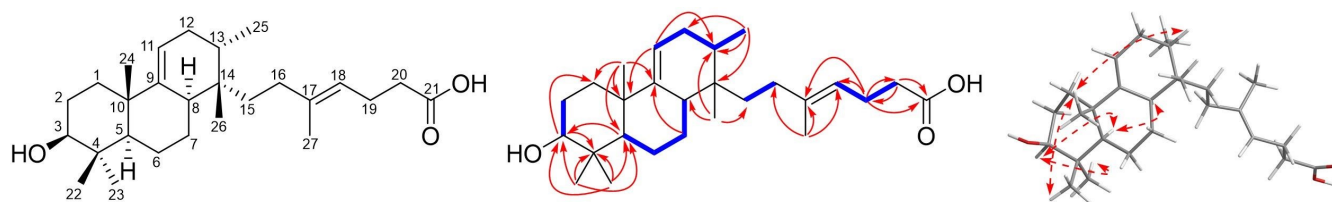

Chemical structure of **15** and  $^1\text{H}$ - $^1\text{H}$  COSY (—), key HMBC correlations (—), and key ROESY correlations (---).

| No. | $\delta_{\text{C}}$ , type | $\delta_{\text{H}}$ , mult. ( $J$ , Hz) |
|-----|----------------------------|-----------------------------------------|
| 1a  | 40.6, $\text{CH}_2$        | 1.95, m                                 |
| 1b  |                            | 1.32, m                                 |
| 2a  | 28.9, $\text{CH}_2$        | 1.70, m                                 |
| 2b  |                            | 1.63, m                                 |
| 3   | 79.8, CH                   | 3.13, dd (11.4, 4.7)                    |
| 4   | 40.3, C                    |                                         |
| 5   | 45.6, CH                   | 1.32, overlapped                        |
| 6a  | 19.7, $\text{CH}_2$        | 1.71, m                                 |
| 6b  |                            | 1.31, overlapped                        |
| 7a  | 30.3, $\text{CH}_2$        | 1.32, 2H, overlapped                    |
| 7b  |                            |                                         |
| 8   | 39.7, CH                   | 2.02, m                                 |
| 9   | 151.3, C                   |                                         |
| 10  | 39.0, C                    |                                         |
| 11  | 115.9, CH                  | 5.37, m                                 |
| 12a | 31.4, $\text{CH}_2$        | 2.23, m                                 |
| 12b |                            | 1.71, overlapped                        |
| 13  | 33.7, CH                   | 1.61, m                                 |
| 14  | 36.6, C                    |                                         |
| 15a | 38.0, $\text{CH}_2$        | 1.50, td (12.3, 4.3)                    |
| 15b |                            | 1.33, overlapped                        |
| 16a | 34.3, $\text{CH}_2$        | 1.95, m                                 |
| 16b |                            | 1.85, td (12.7, 4.2)                    |
| 17  | 138.7, C                   |                                         |
| 18  | 123.3, CH                  | 5.15, t (6.7)                           |
| 19a | 24.8, $\text{CH}_2$        | 2.30, 2H, d (3.2)                       |
| 19b |                            |                                         |
| 20a | 35.4, $\text{CH}_2$        | 2.30, 2H, overlapped                    |
| 20b |                            |                                         |
| 21  | 177.7, C                   |                                         |
| 22  | 15.8, $\text{CH}_3$        | 0.86, s                                 |
| 23  | 28.2, $\text{CH}_3$        | 0.95, s                                 |
| 24  | 25.8, $\text{CH}_3$        | 1.09, s                                 |
| 25  | 15.2, $\text{CH}_3$        | 0.81, d (7.0)                           |
| 26  | 20.3, $\text{CH}_3$        | 0.73                                    |
| 27  | 16.3, $\text{CH}_3$        | 1.65, s                                 |

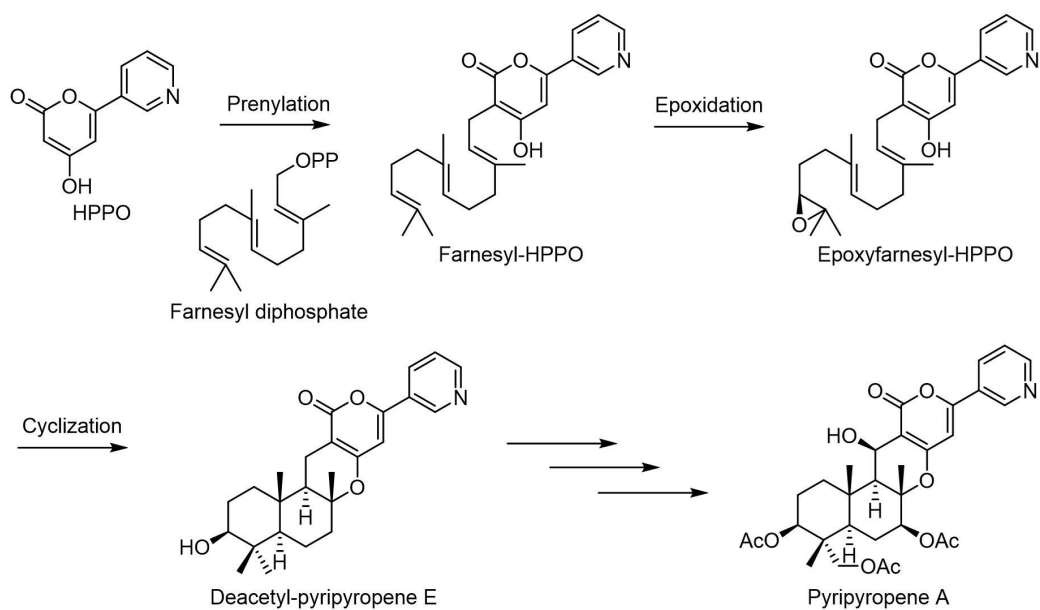

**Figure S1.** Biosynthetic pathway of pyripyropene A. The biosynthesis of pyripyropene A start with the assembly of the polyketide moiety, which is followed by prenylation of the polyketide, stereospecific epoxidation of the olefin of the prenyl chain, and cyclization of the terpenoid moiety to generate the core scaffold.<sup>[19]</sup>



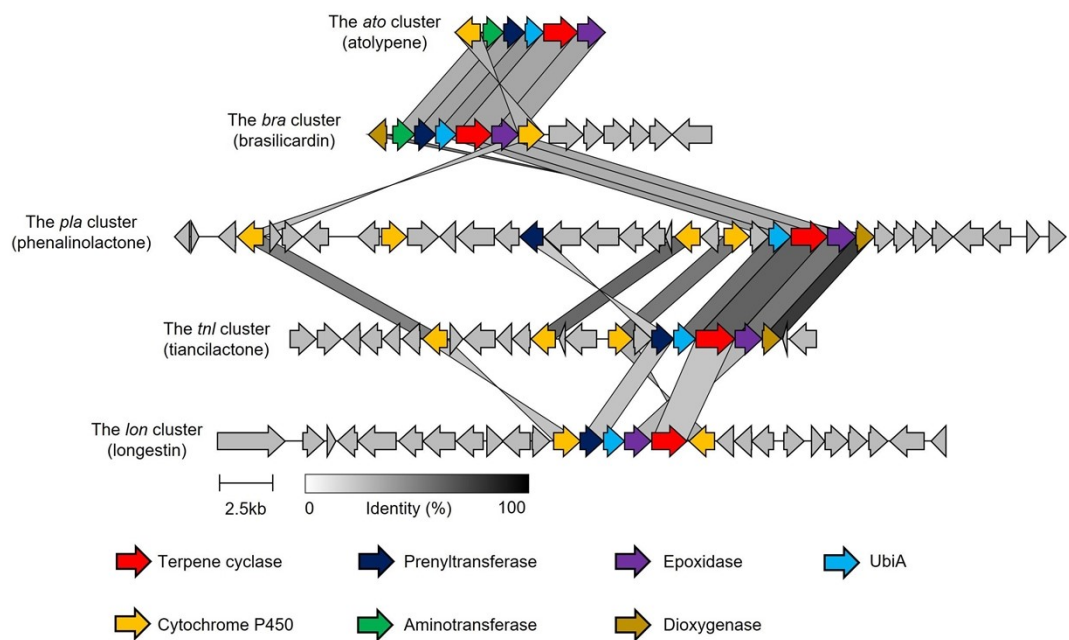

**Figure S2.** Schematic representation of the *ato* cluster and its homologous gene clusters and BLASTp comparisons of each gene product.

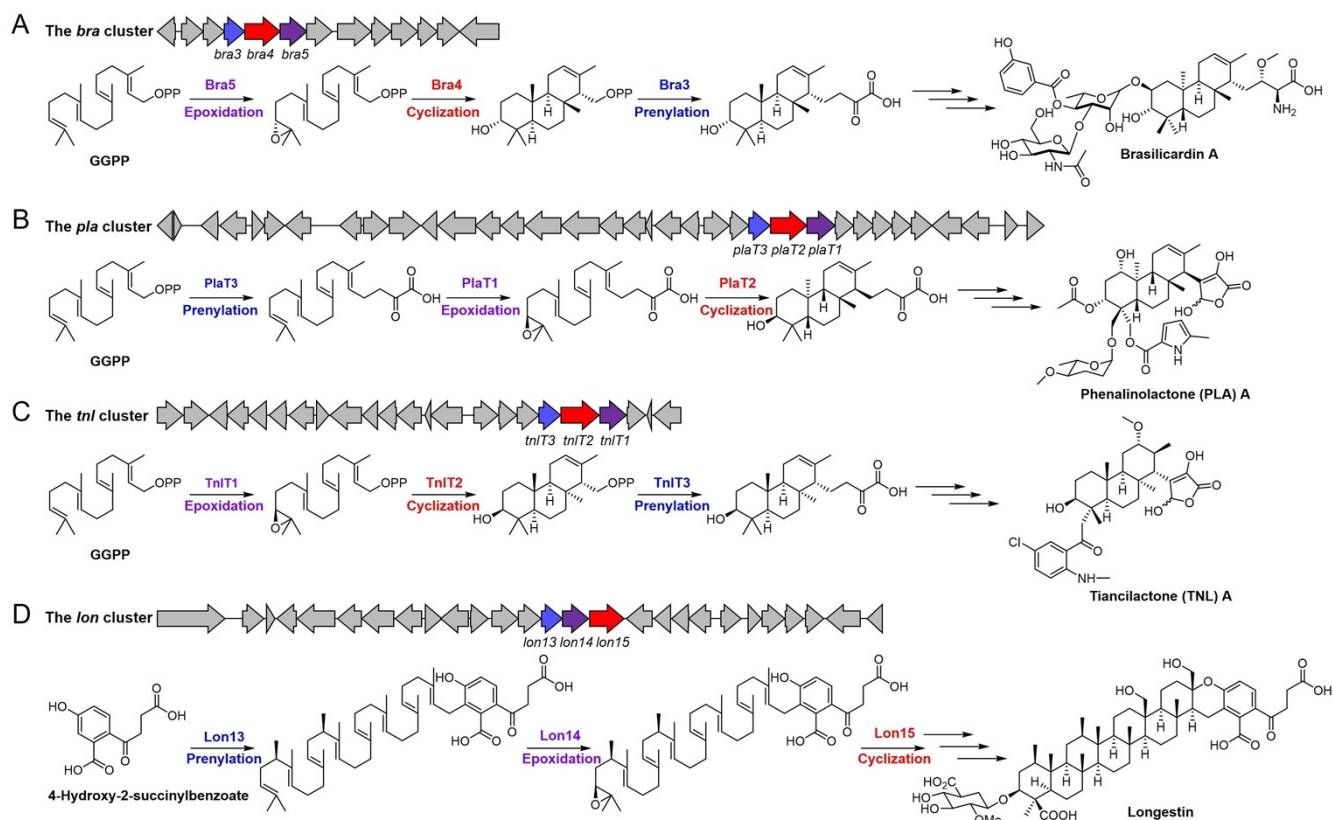

**Figure S3.** Proposed biosynthetic pathways of brasilicardin A,<sup>[20]</sup> phenalinolactone A,<sup>[21,22]</sup> tiansilactone A,<sup>[3]</sup> and longestin.<sup>[23]</sup>

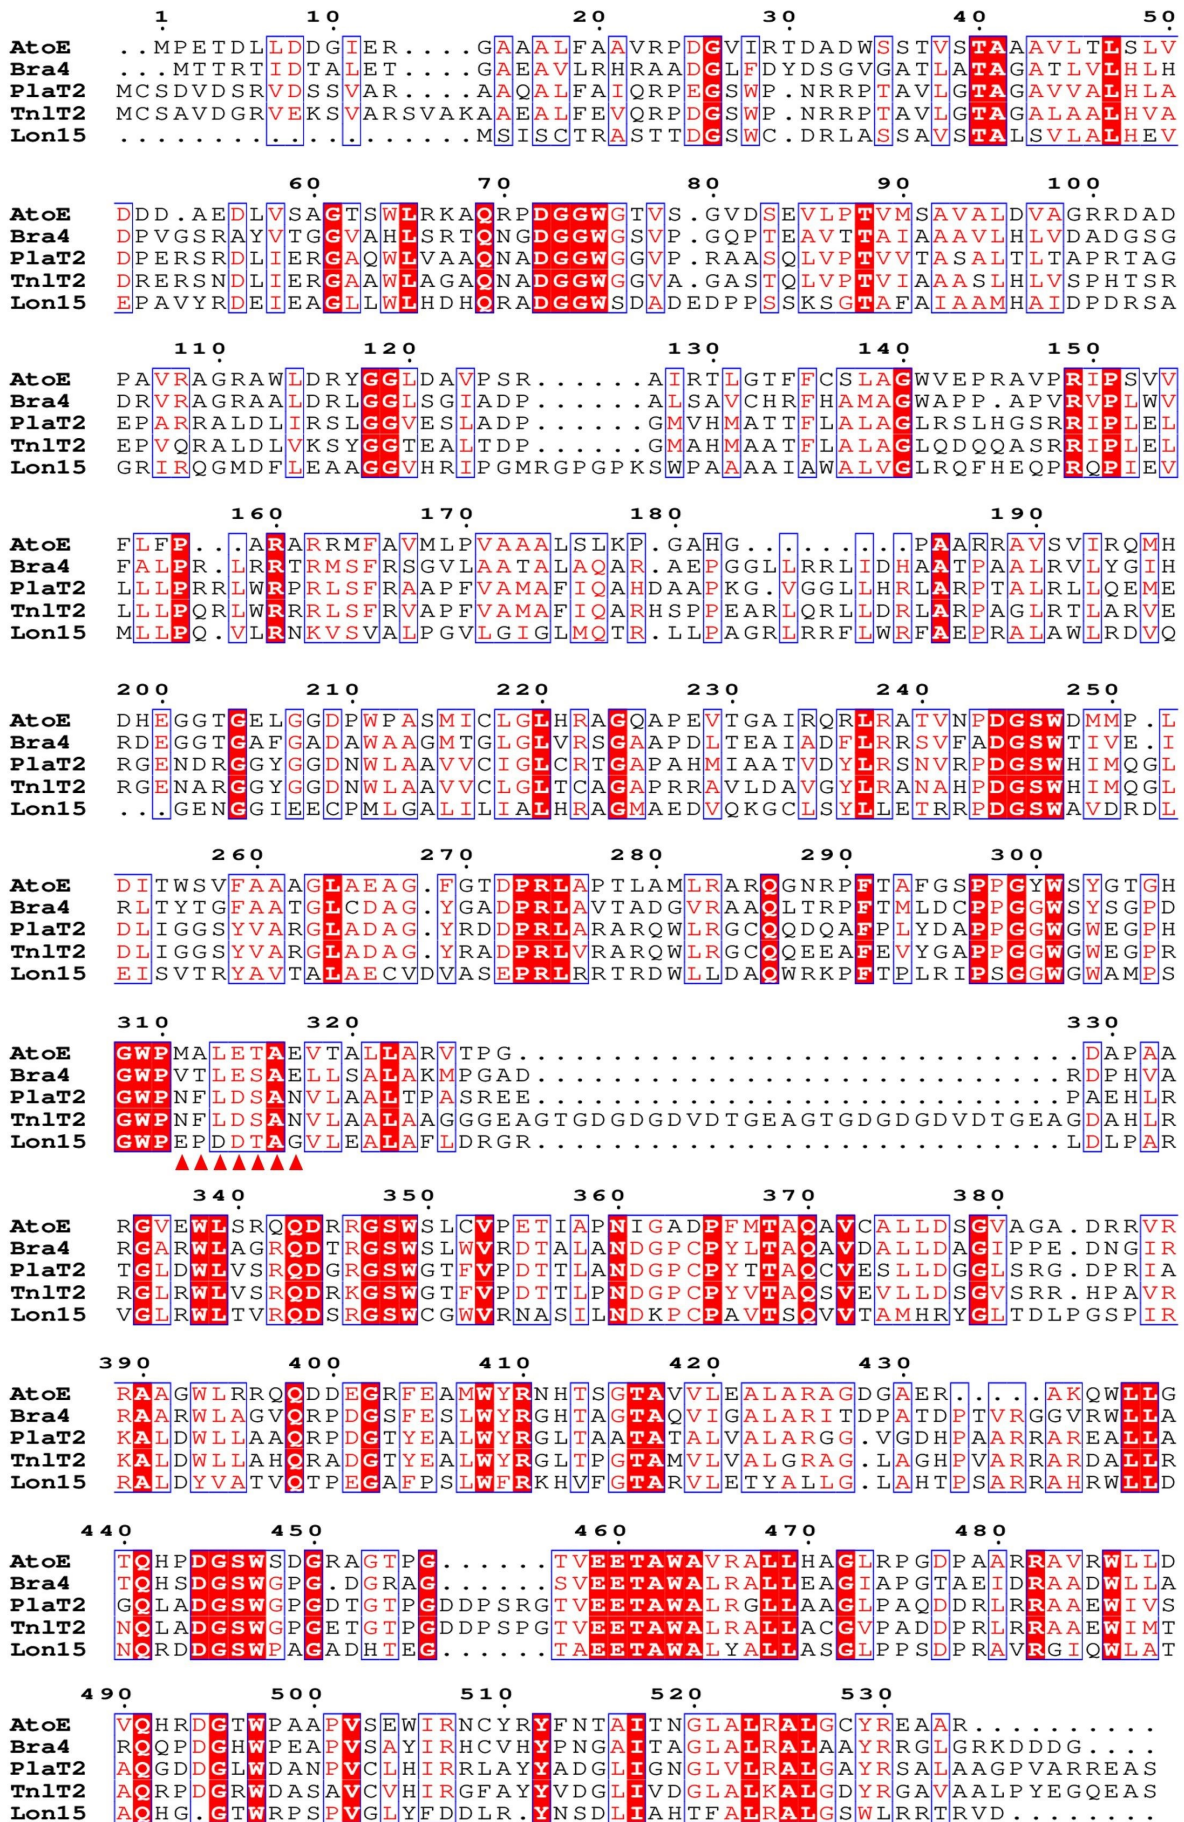

**Figure S4.** Amino acid sequence alignment of bacterial noncanonical class II MTCs. Alignment of amino acid sequences was conducted for bacterial noncanonical class II MTCs, including AtoE, Bra4, PlaT2, TnlT2, and Lon15. All these MTCs contain the noncanonical sequence motifs xxx(E/D)(T/S)xE, which are marked with red triangle symbols. The sequence alignment was generated by Clustal Omega and the figure drawn in EsPrint 3.0.

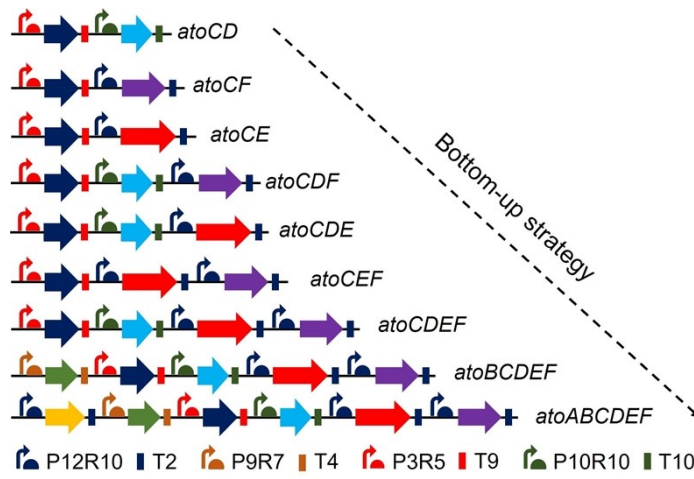

**Figure S5.** Reconstitution of the *ato* gene cluster. A bottom-up strategy was adopted for the comprehensive reconstruction of the *ato* genes, with all gene combinations meticulously constructed and integrated into the pSET152 vector.



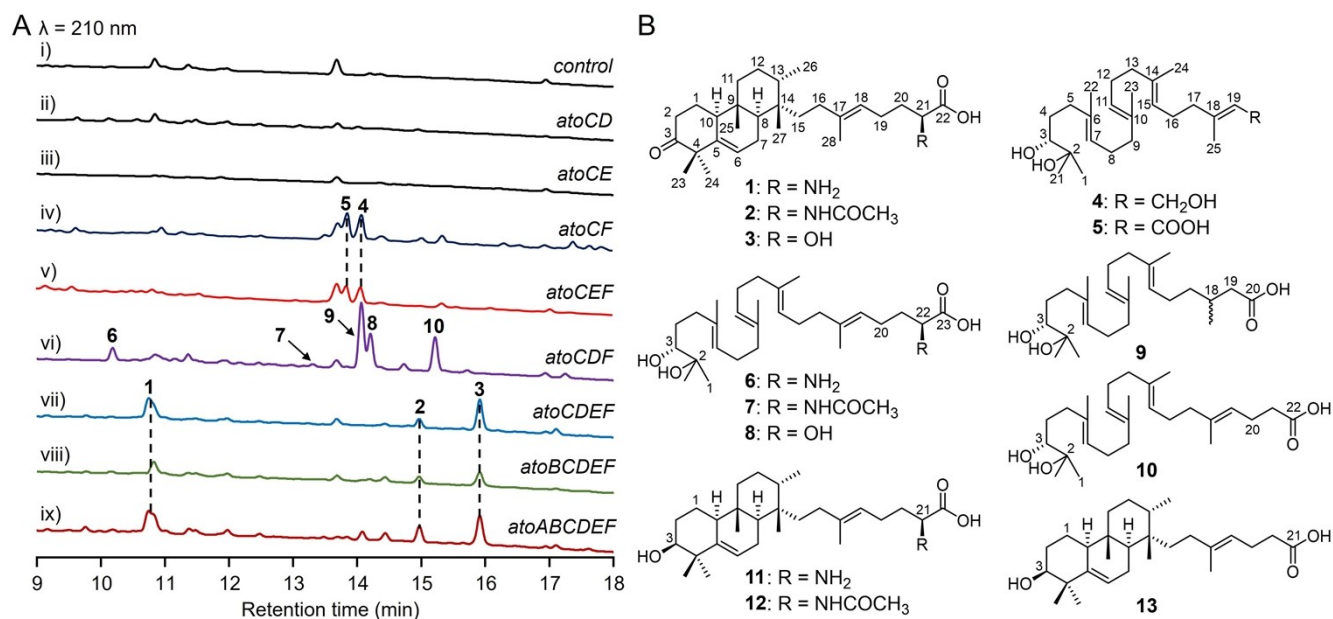

**Figure S6.** Analysis of metabolites from engineered *Streptomyces* strains. A) HPLC results ( $\lambda_{\text{max}} = 210 \text{ nm}$ ). *S. albus* J1074 with empty pSET152 was used as a control. B) Structures of the metabolites isolated in this study (1–13).

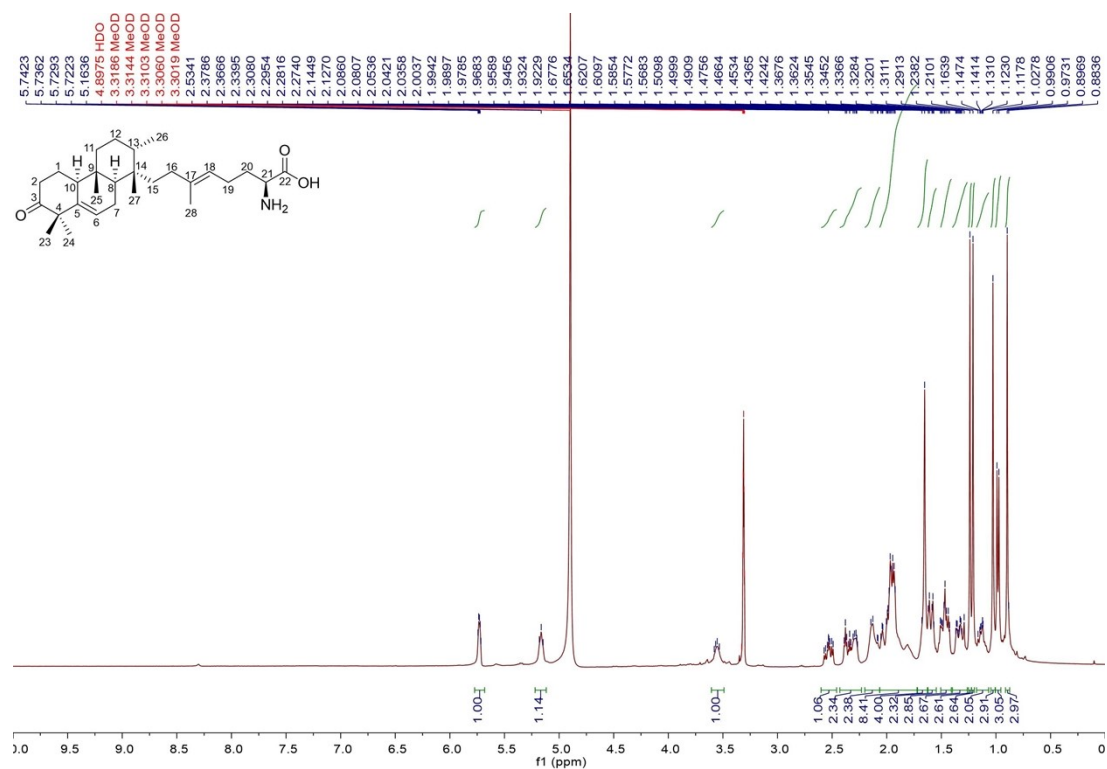

Figure S7.  $^1\text{H}$  NMR spectrum of atolypene A (1) in methanol- $d_4$  (400 MHz).

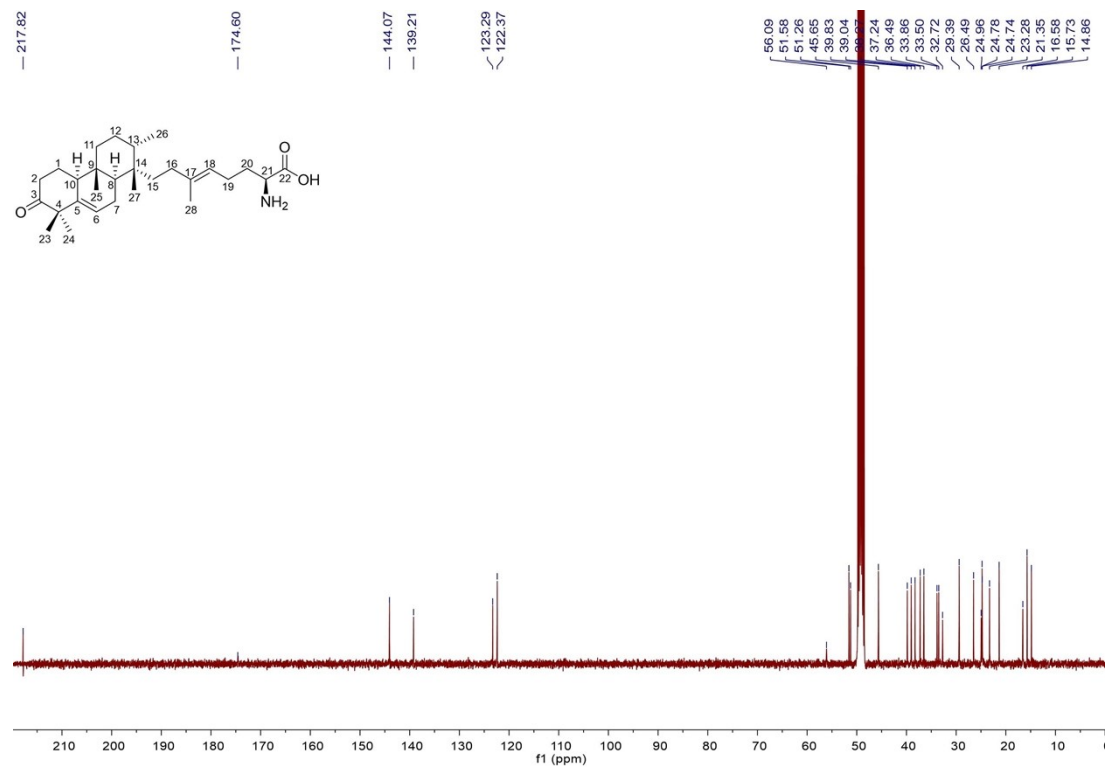

Figure S8.  $^{13}\text{C}$  NMR spectrum of atolypene A (1) in methanol- $d_4$  (100 MHz).

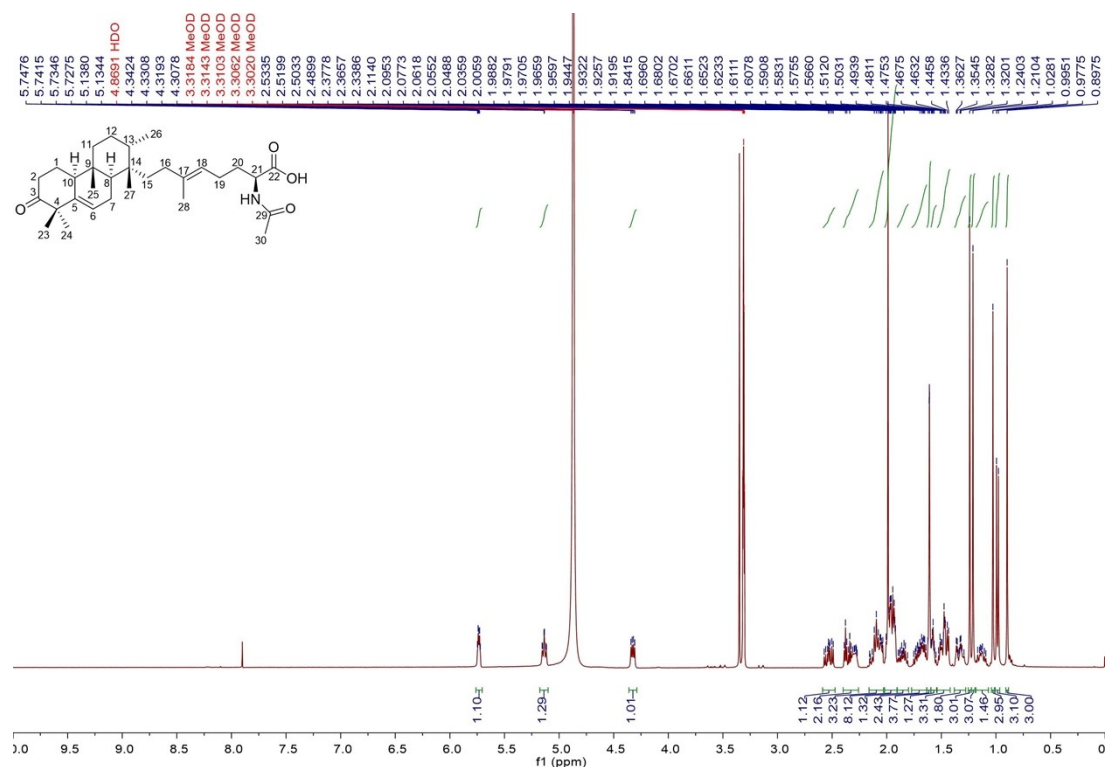

Figure S9. <sup>1</sup>H NMR spectrum of atolypene C (2) in methanol-*d*<sub>4</sub> (100 MHz).

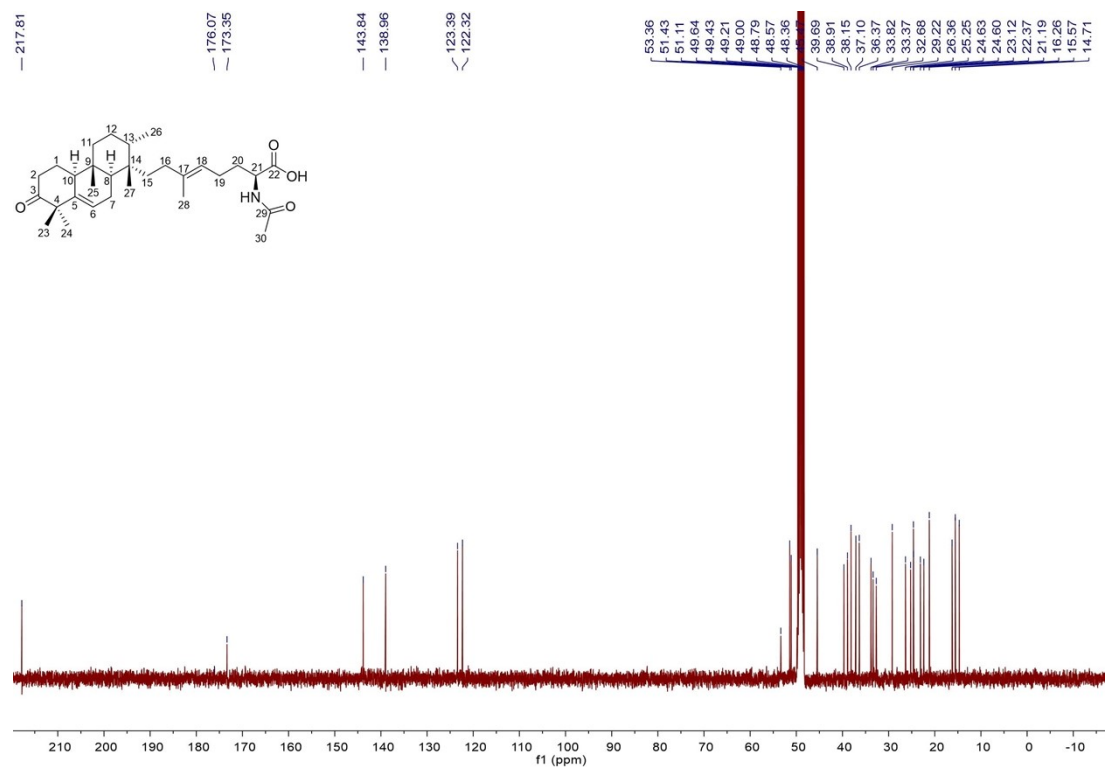

Figure S10. <sup>13</sup>C NMR spectrum of atolypene C (2) in methanol-*d*<sub>4</sub> (100 MHz).

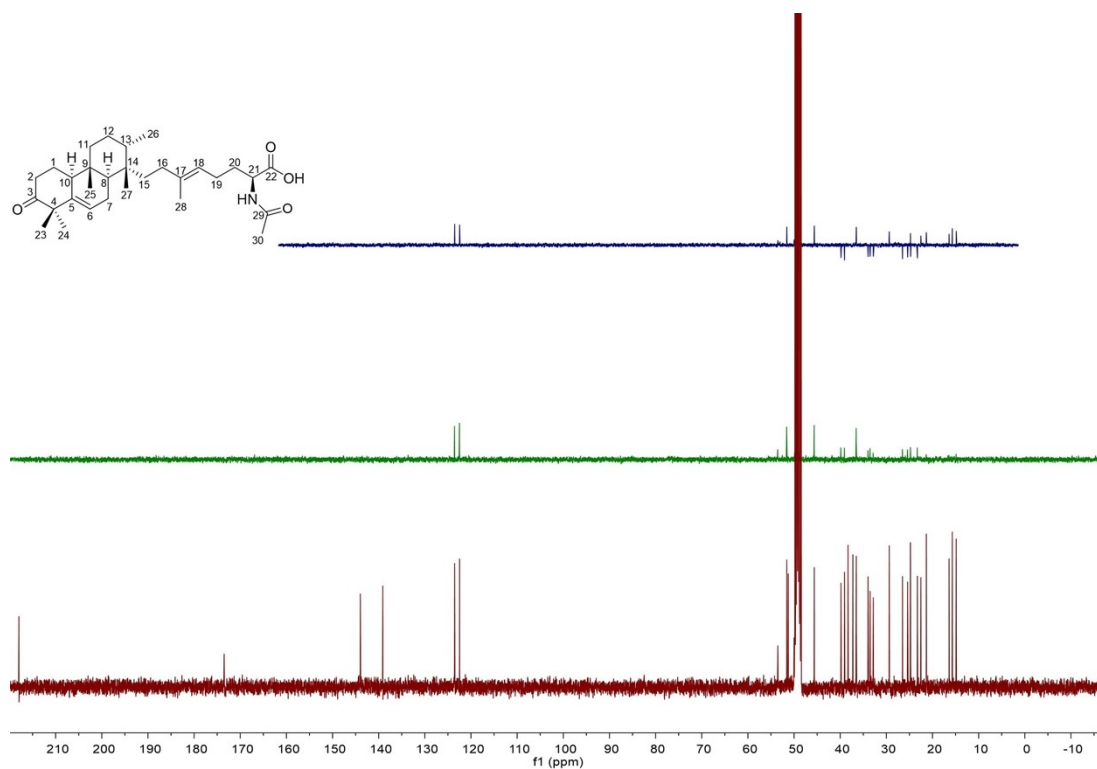

Figure S11. DEPT spectrum of atolypene C (2) in methanol- $d_4$ .

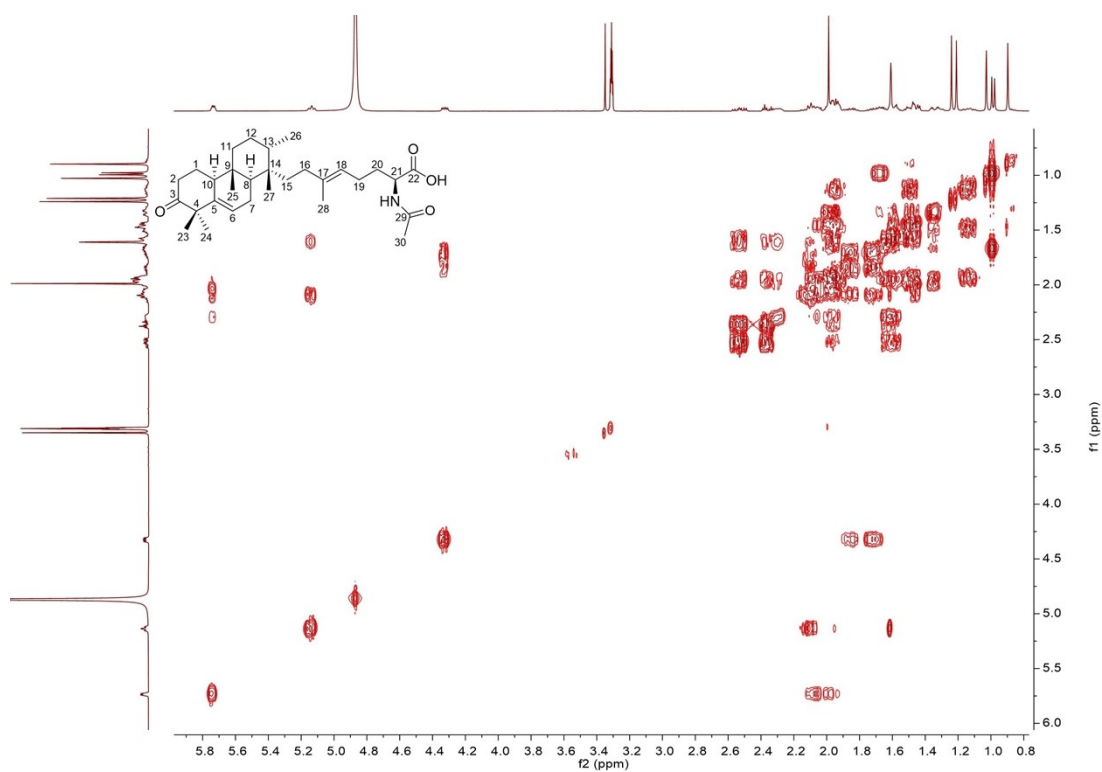

Figure S12.  $^1\text{H}$ - $^1\text{H}$  COSY spectrum of atolypene C (2) in methanol- $d_4$ .



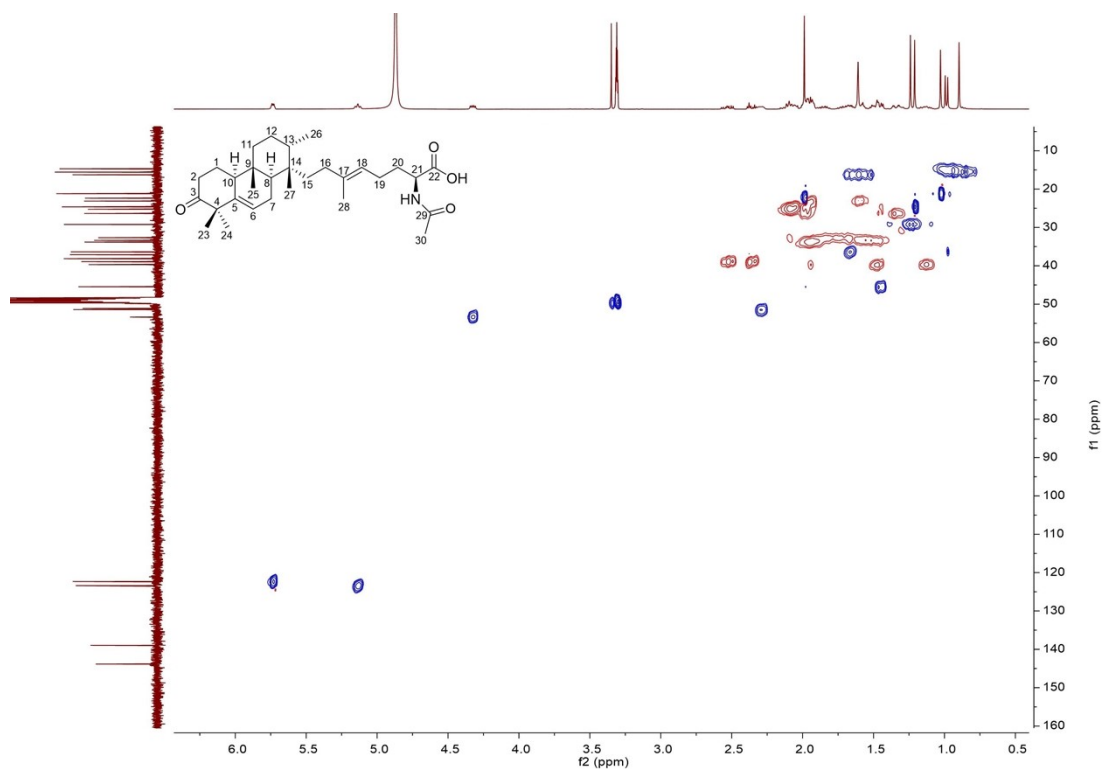

Figure S13. HSQC spectrum of atolypene C (2) in methanol- $d_4$ .

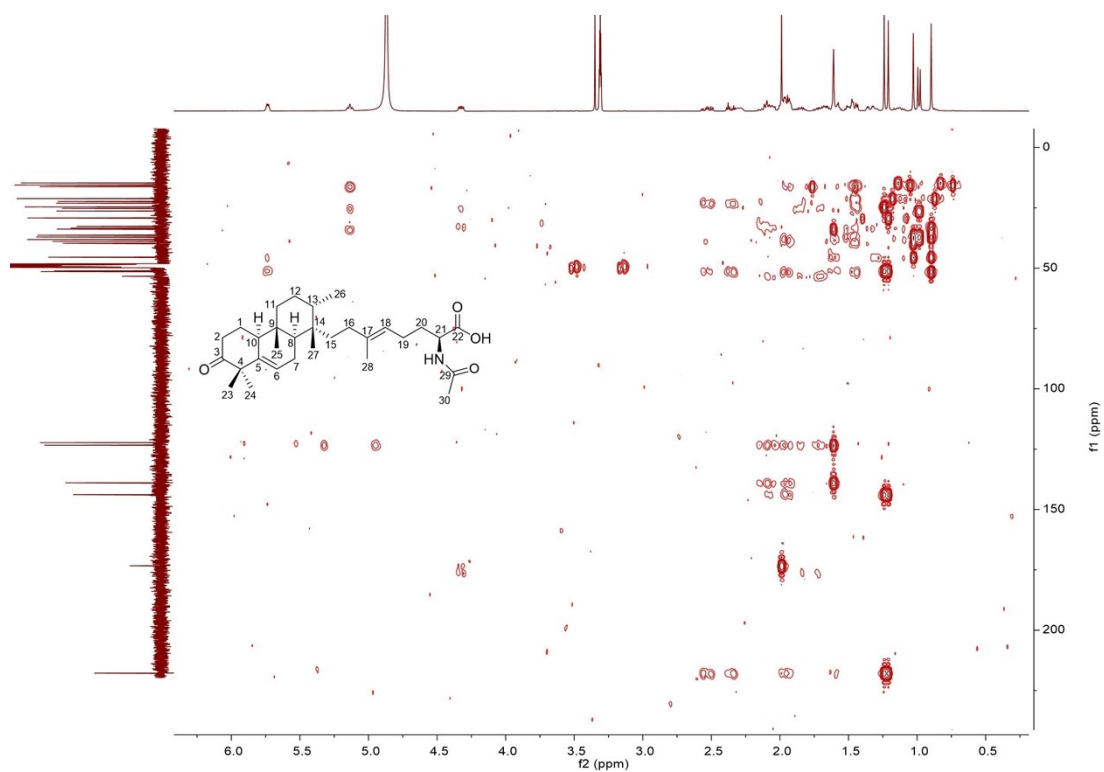

Figure S14. HMBC spectrum of atolypene C (2) in methanol- $d_4$ .

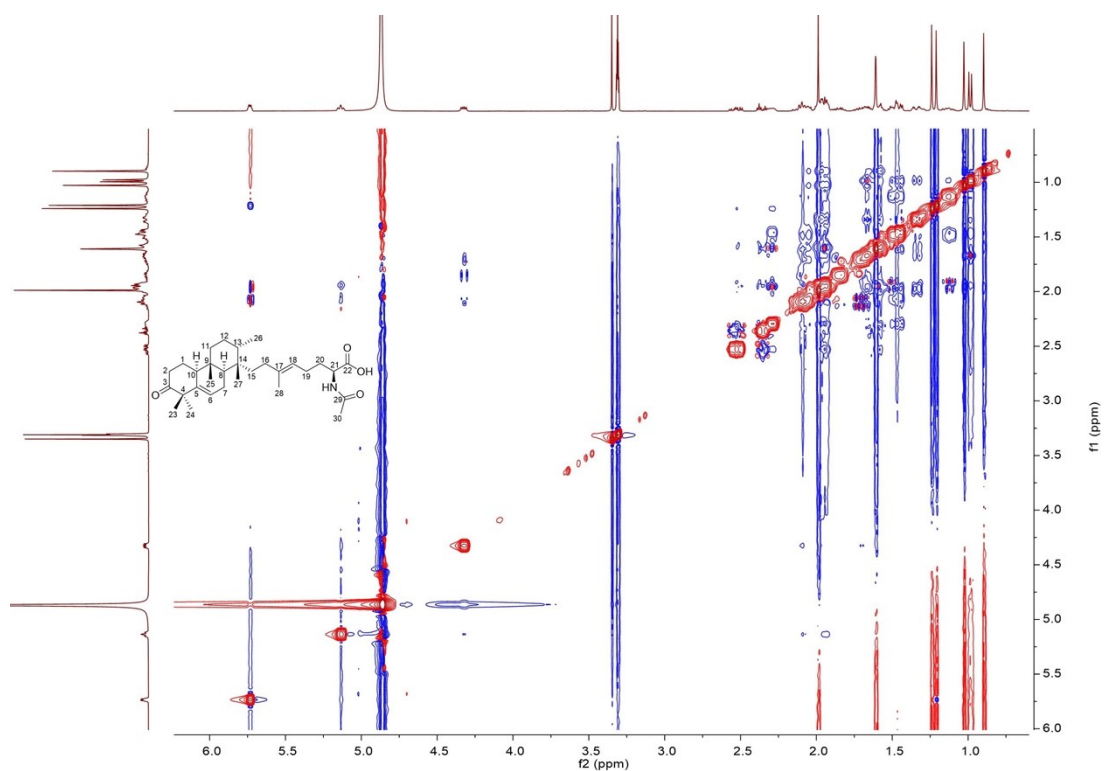

Figure S15. ROESY spectrum of atolpene C (**2**) in methanol- $d_4$ .

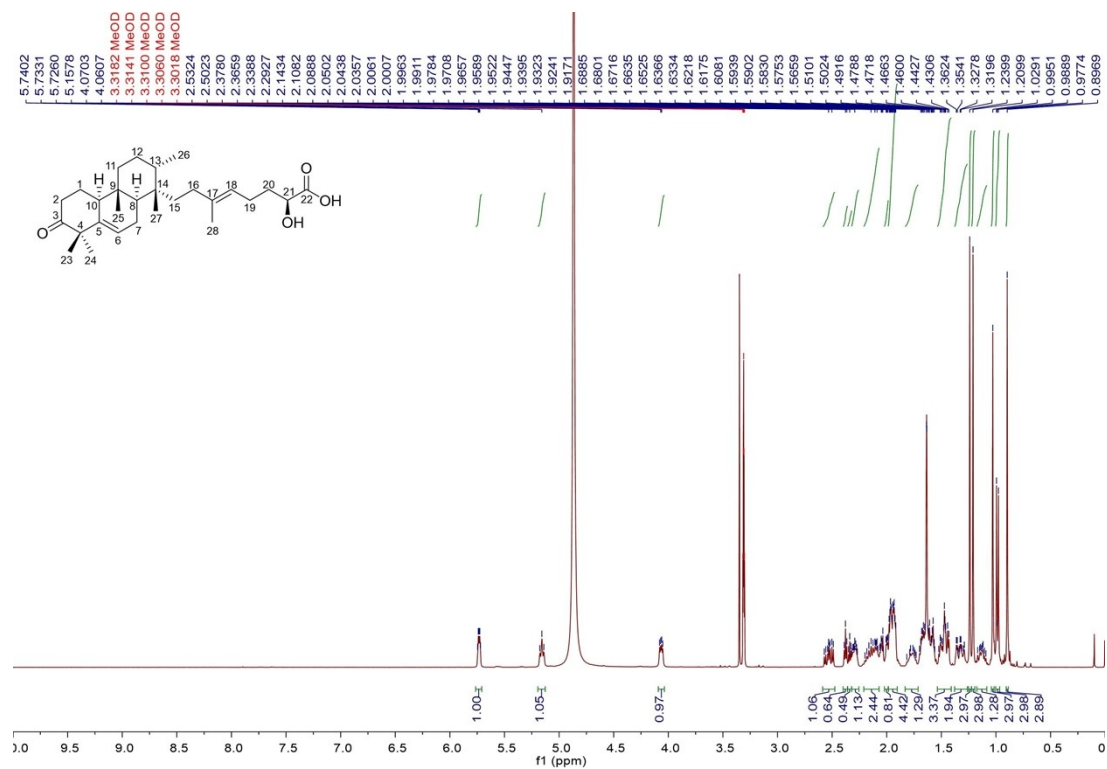

Figure S16.  $^1\text{H}$  NMR spectrum of atolpene D (**3**) in methanol- $d_4$  (400 MHz).

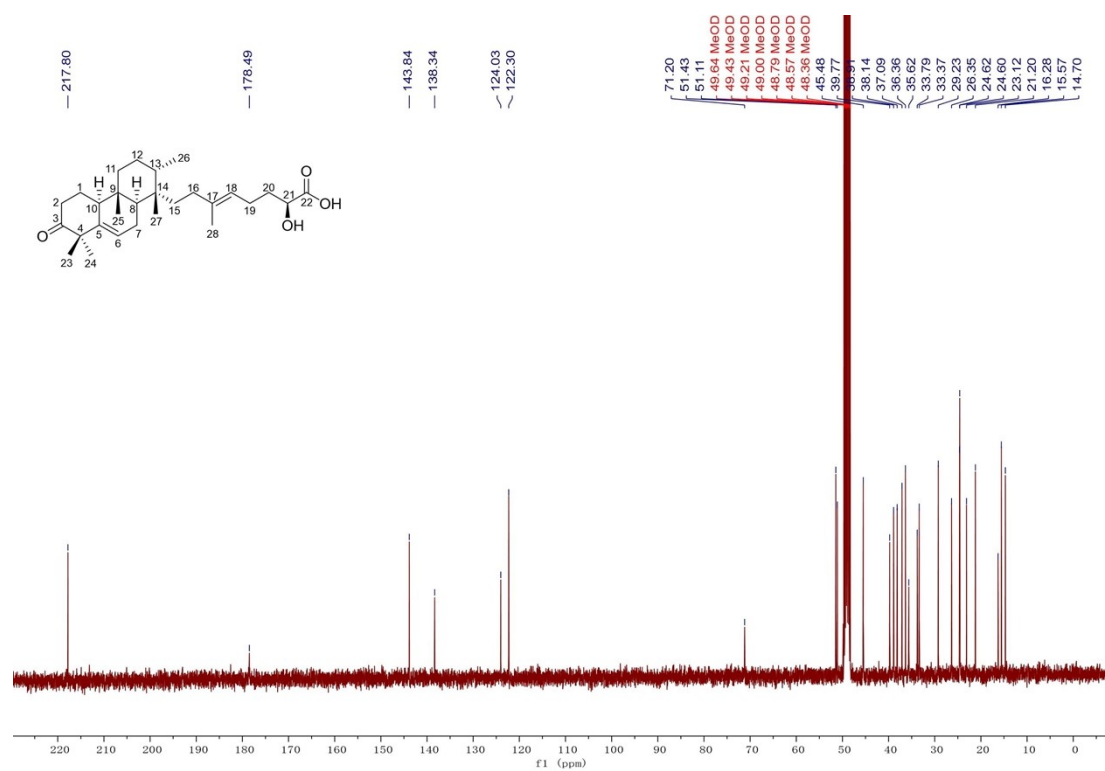

Figure S17.  $^{13}\text{C}$  NMR spectrum of atolypene D (3) in methanol- $d_4$  (100 MHz).

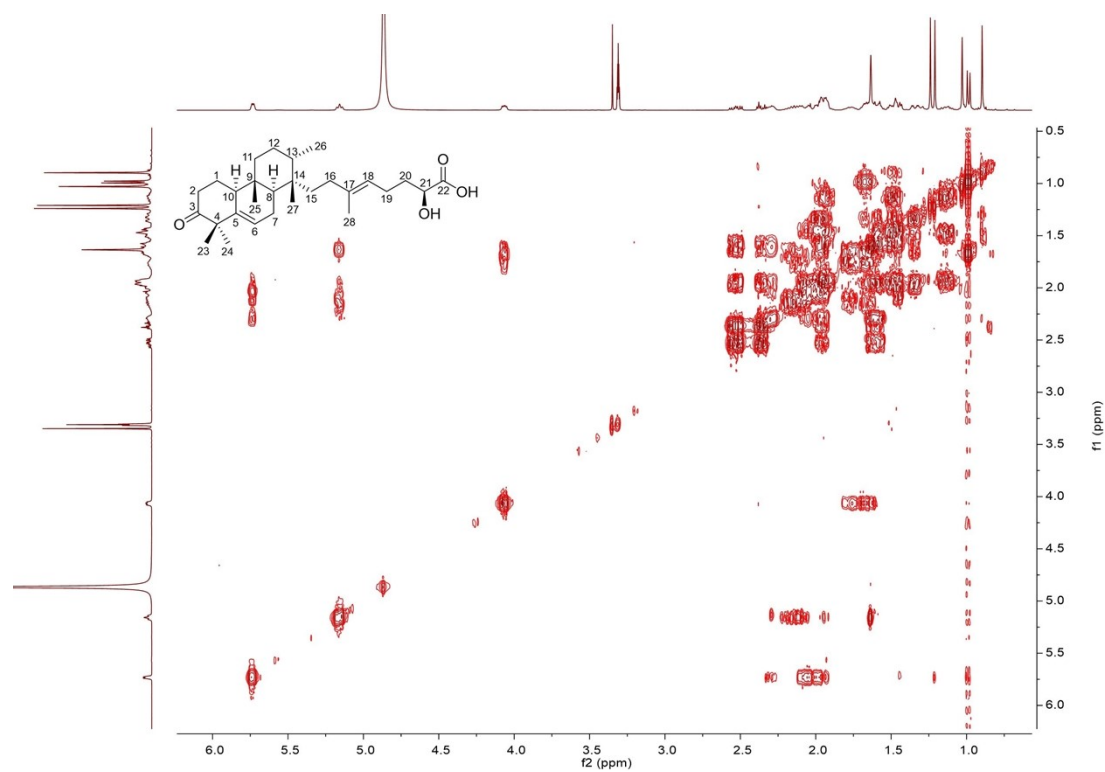

Figure S18.  $^1\text{H}$ - $^1\text{H}$  COSY spectrum of atolypene D (3) in methanol- $d_4$ .

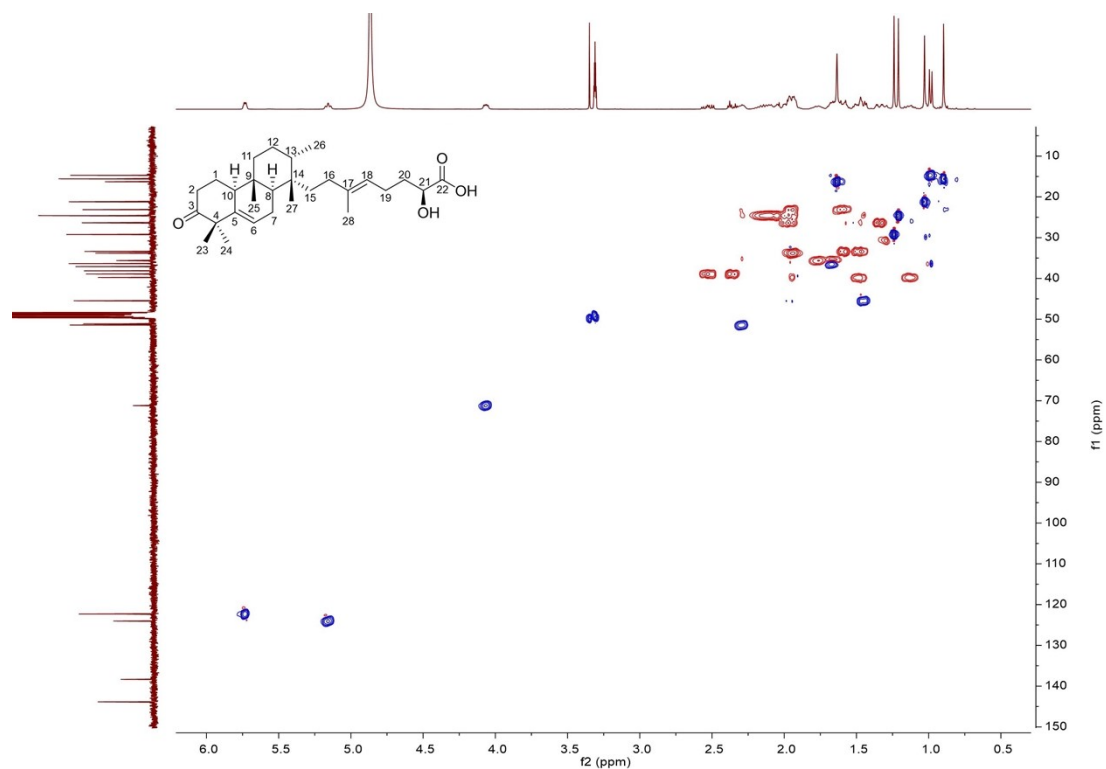

Figure S19. HSQC spectrum of atolypene D (**3**) in methanol- $d_4$ .

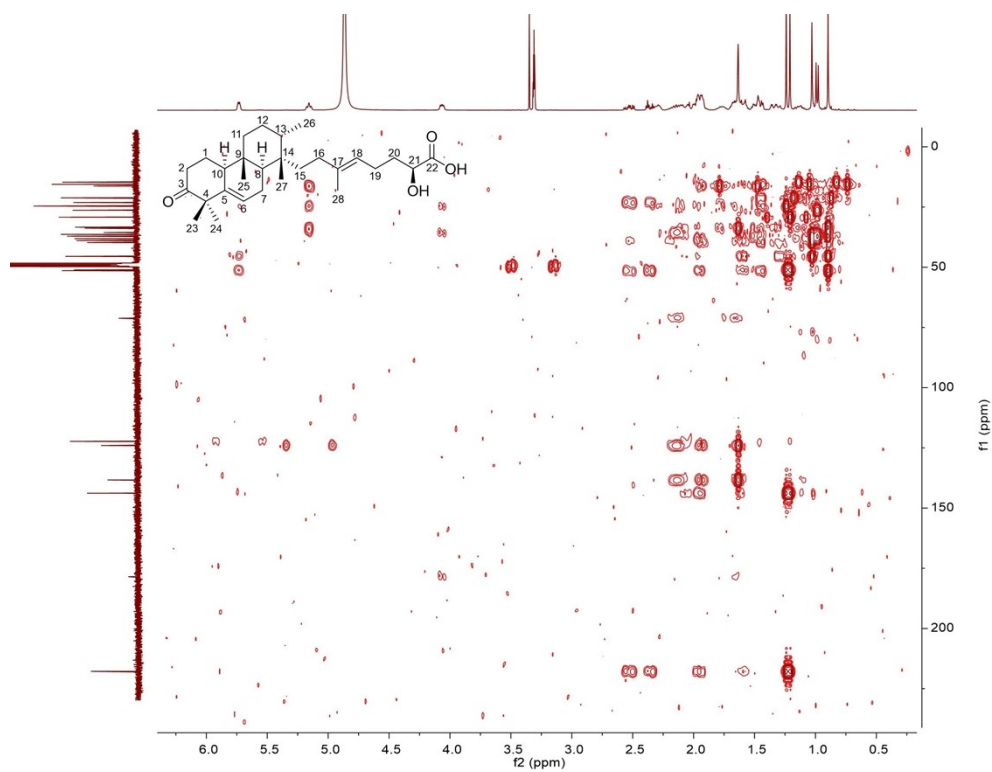

Figure S20. HMBC spectrum of atolypene D (**3**) in methanol- $d_4$ .

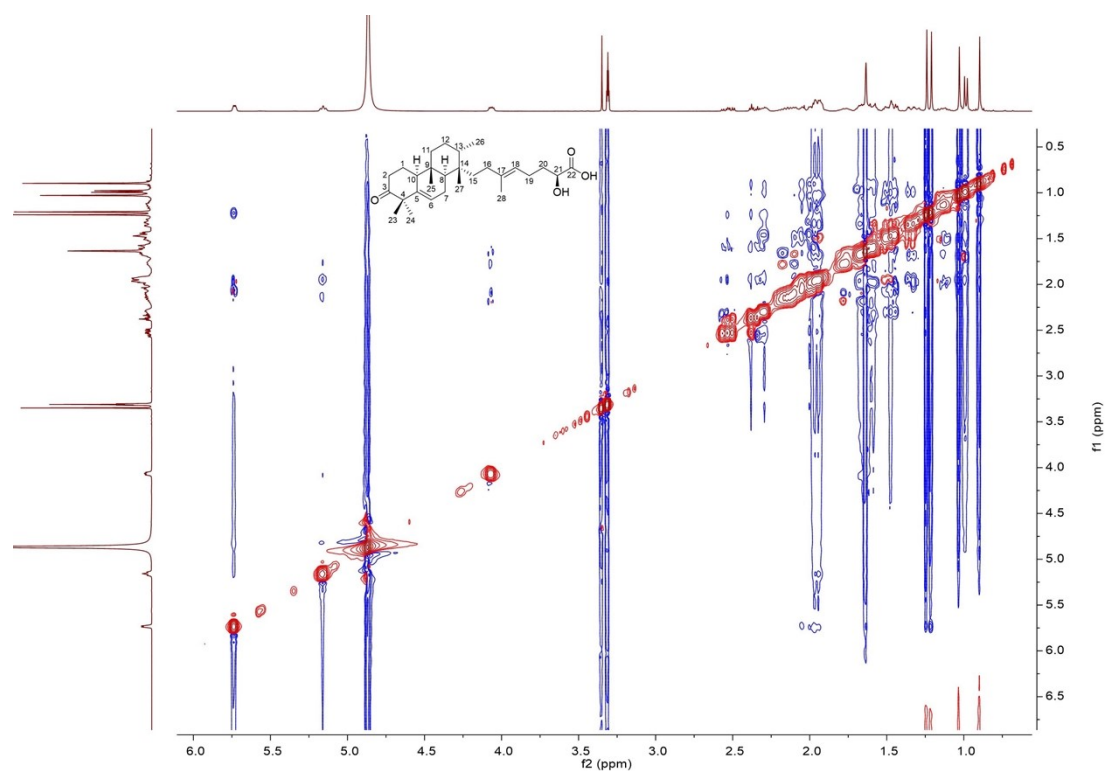

Figure S21. ROESY spectrum of atolypene D (**3**) in methanol- $d_4$ .

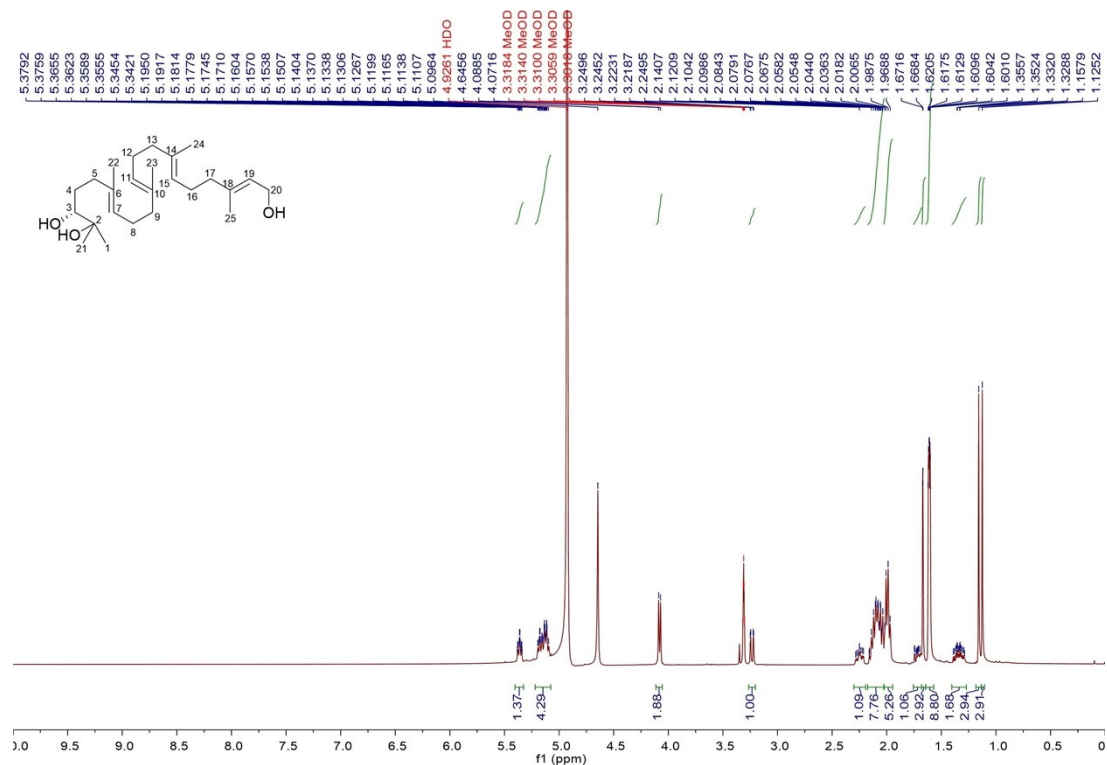

Figure S22.  $^1\text{H}$  NMR spectrum of **4** in methanol- $d_4$  (400 MHz).

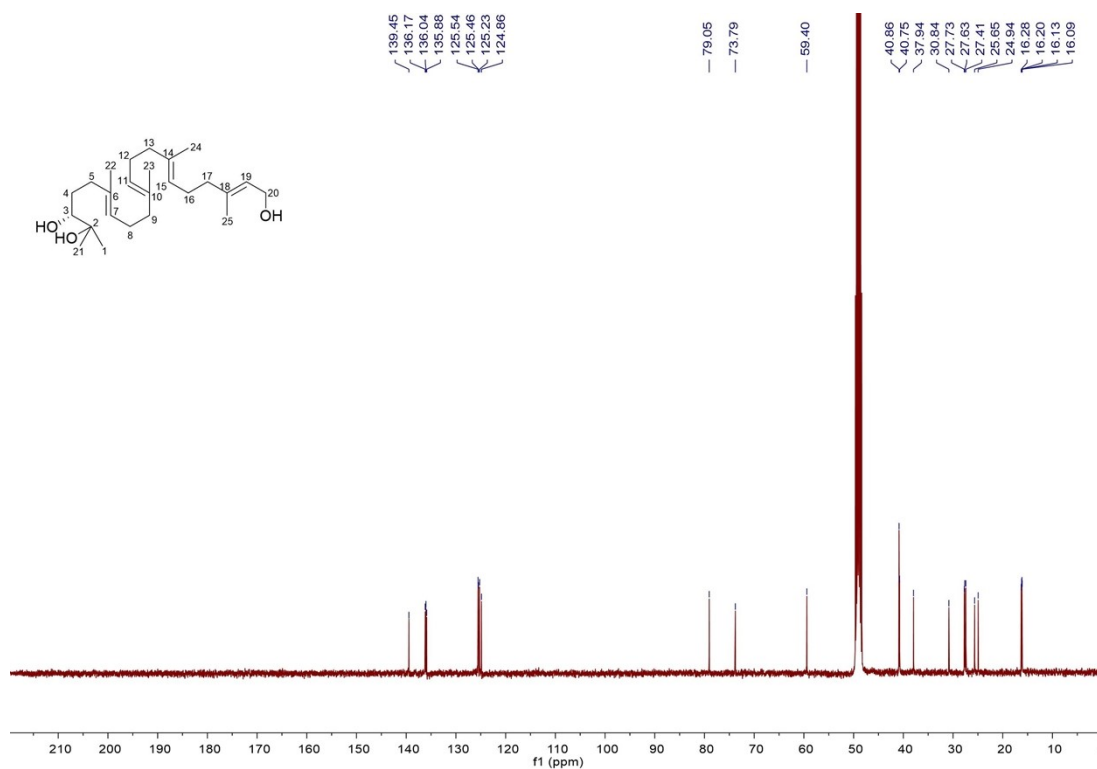

Figure S23. <sup>13</sup>C NMR spectrum of 4 in methanol-*d*<sub>4</sub> (100 MHz).

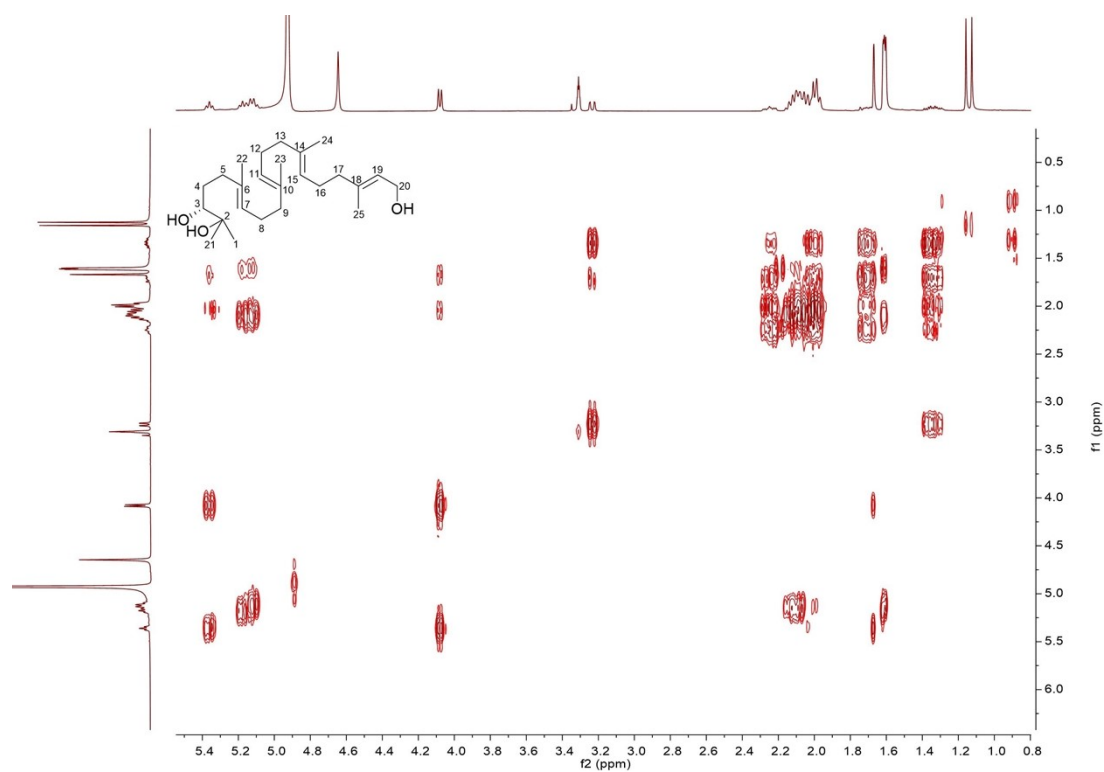

Figure S24. <sup>1</sup>H-<sup>1</sup>H COSY spectrum of 4 in methanol-*d*<sub>4</sub>.

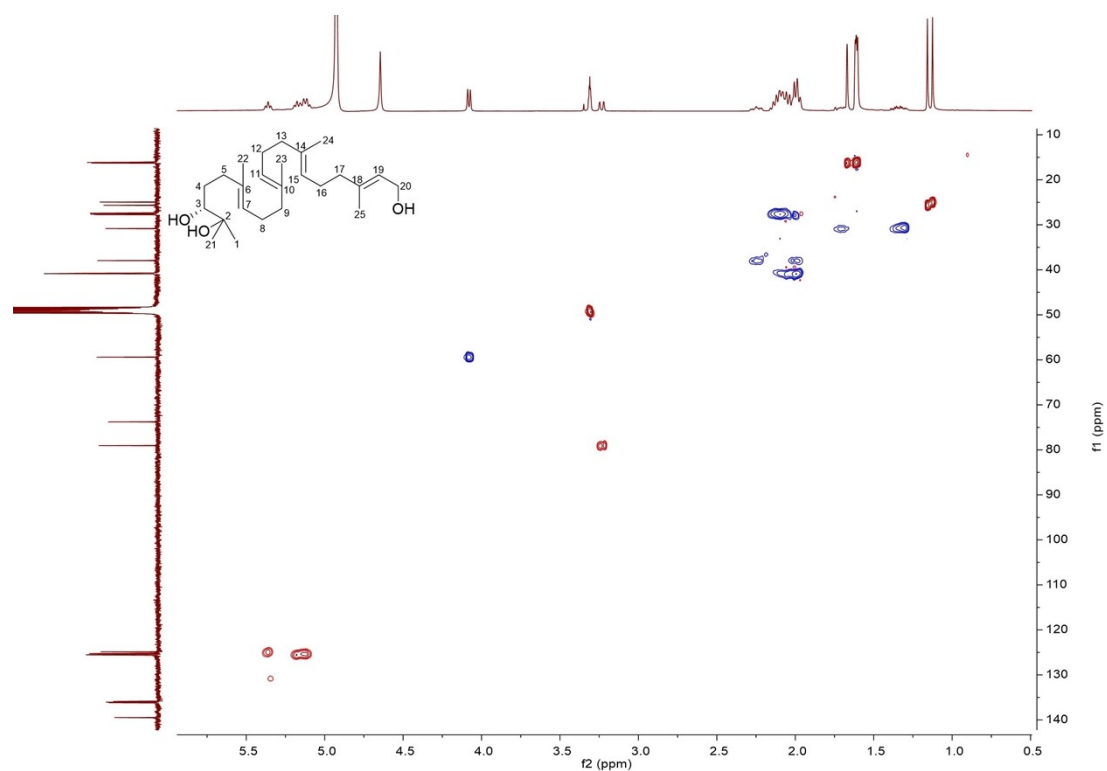

Figure S25. HSQC spectrum of **4** in methanol- $d_4$ .

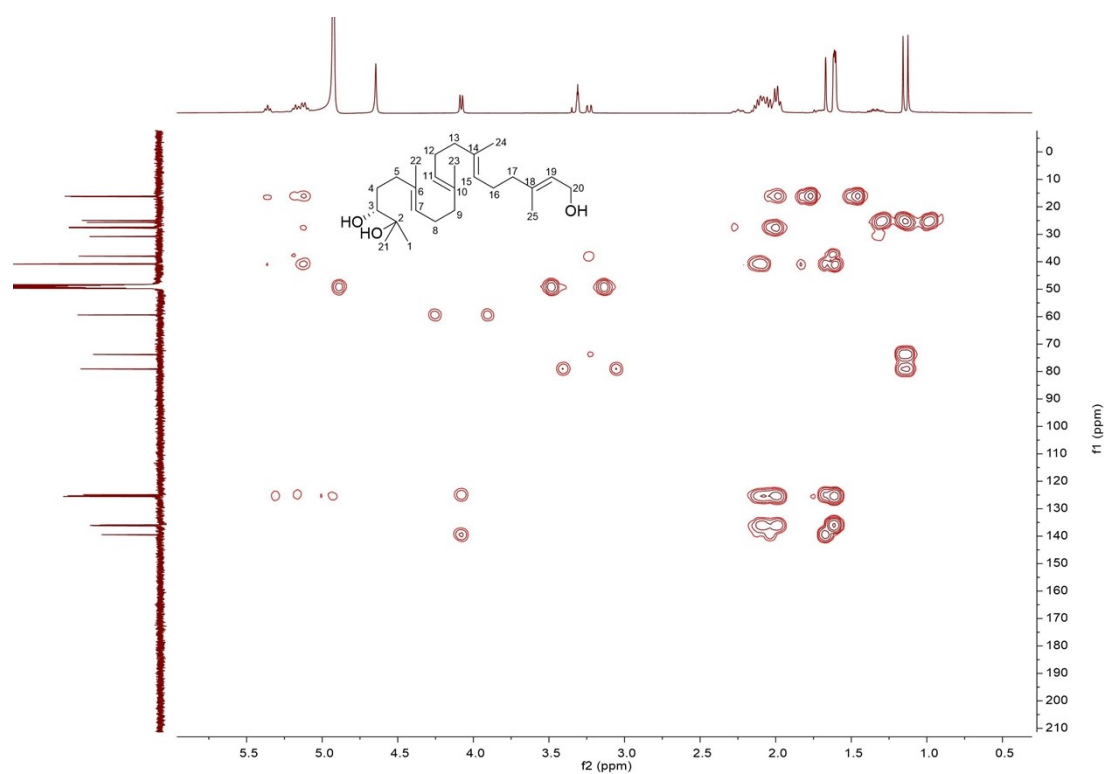

Figure S26. HMBC spectrum of **4** in methanol- $d_4$ .



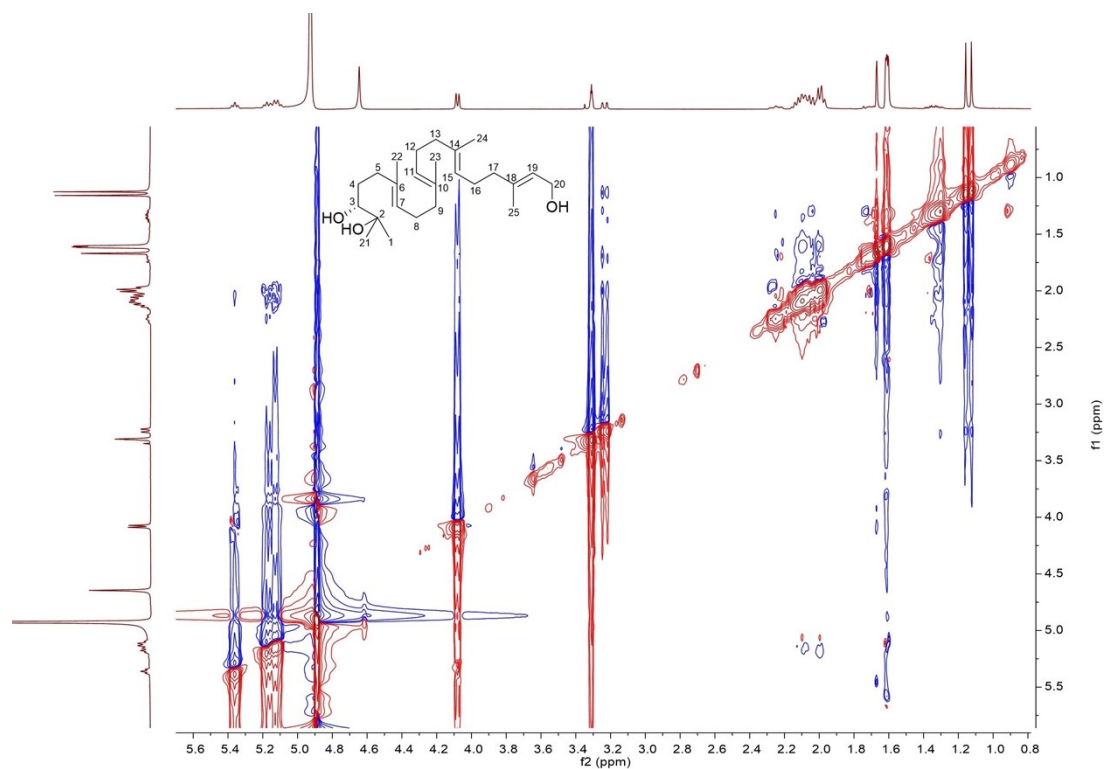

Figure S27. ROESY spectrum of **4** in methanol- $d_4$ .

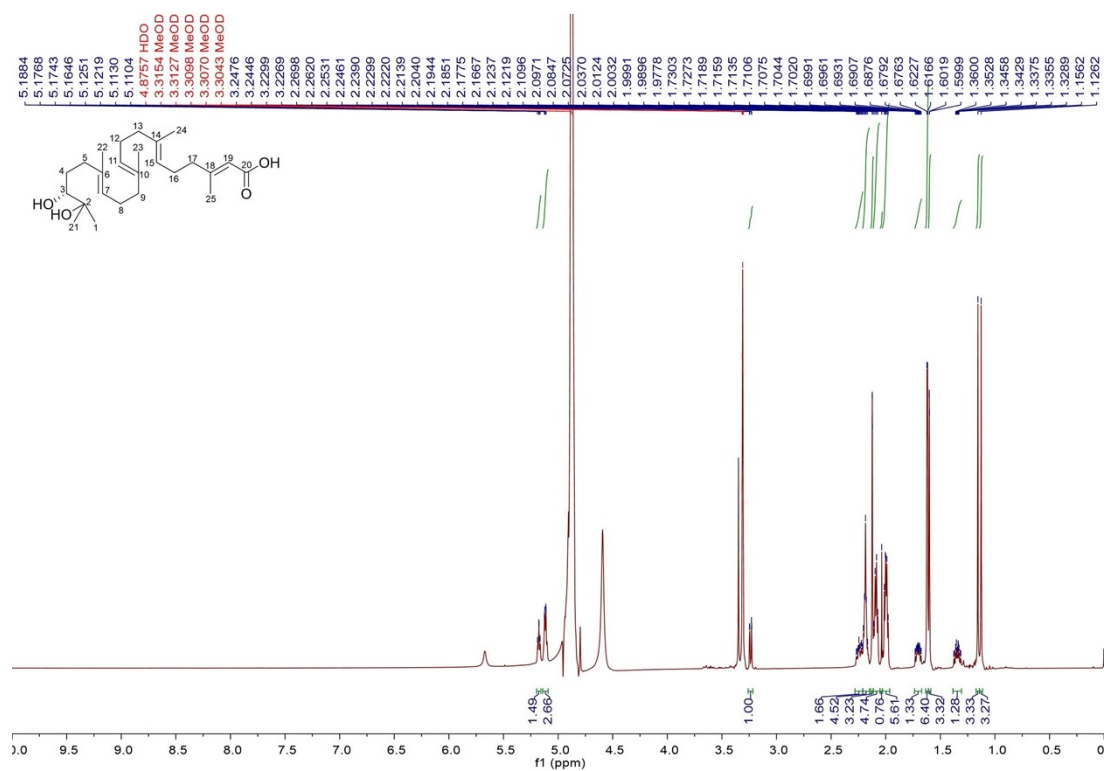

Figure S28.  $^1\text{H}$  NMR spectrum of **5** in methanol- $d_4$  (400 MHz).



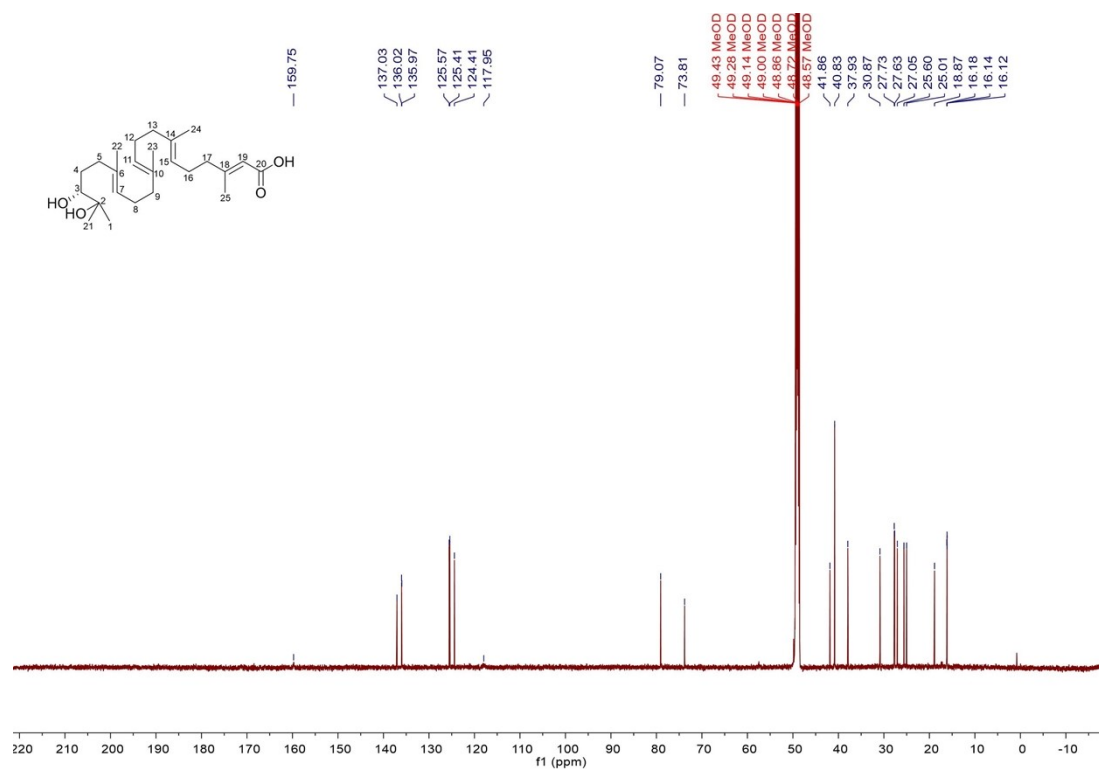

Figure S29.  $^{13}\text{C}$  NMR spectrum of 5 in methanol- $\text{d}_4$  (100 MHz).

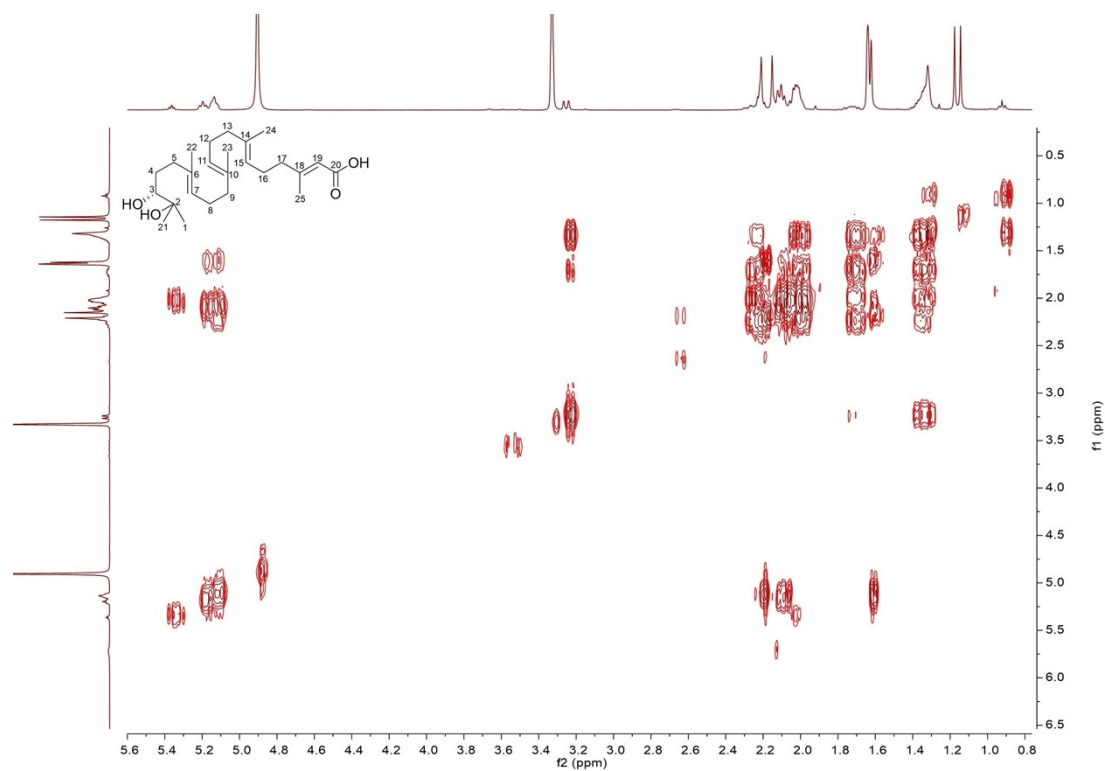

Figure S30.  $^1\text{H}$ - $^1\text{H}$  COSY spectrum of 5 in methanol- $\text{d}_4$ .

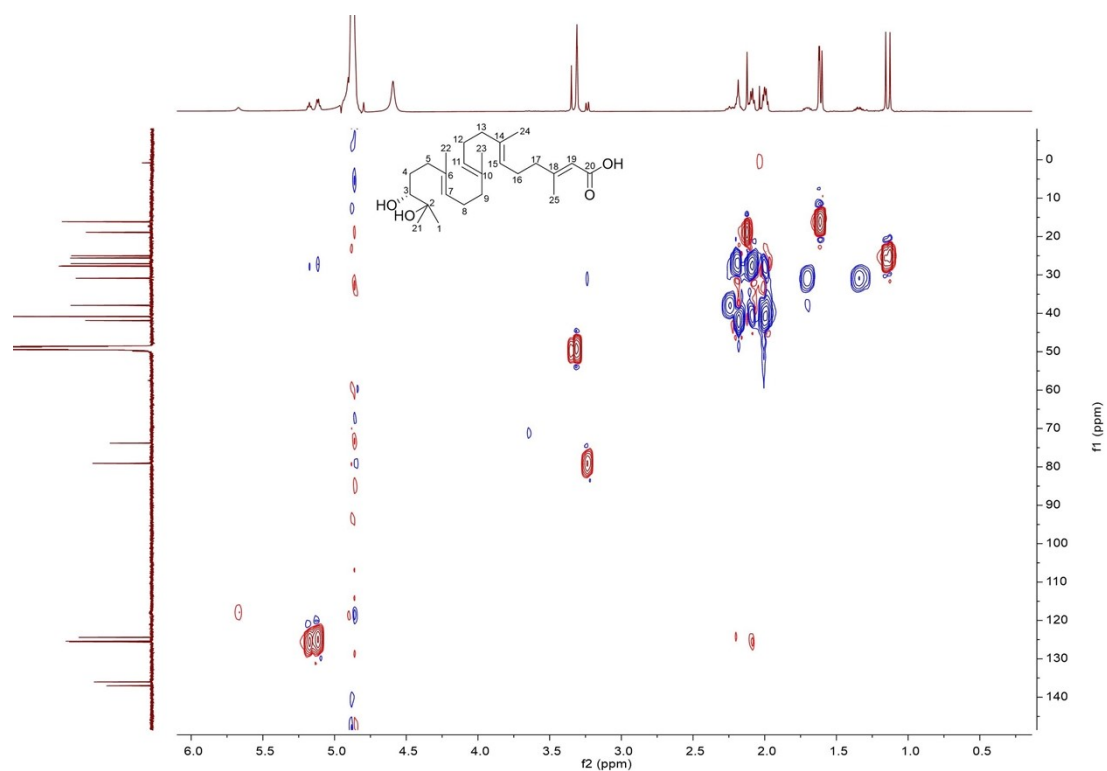

Figure S31. HSQC spectrum of **5** in methanol- $d_4$ .

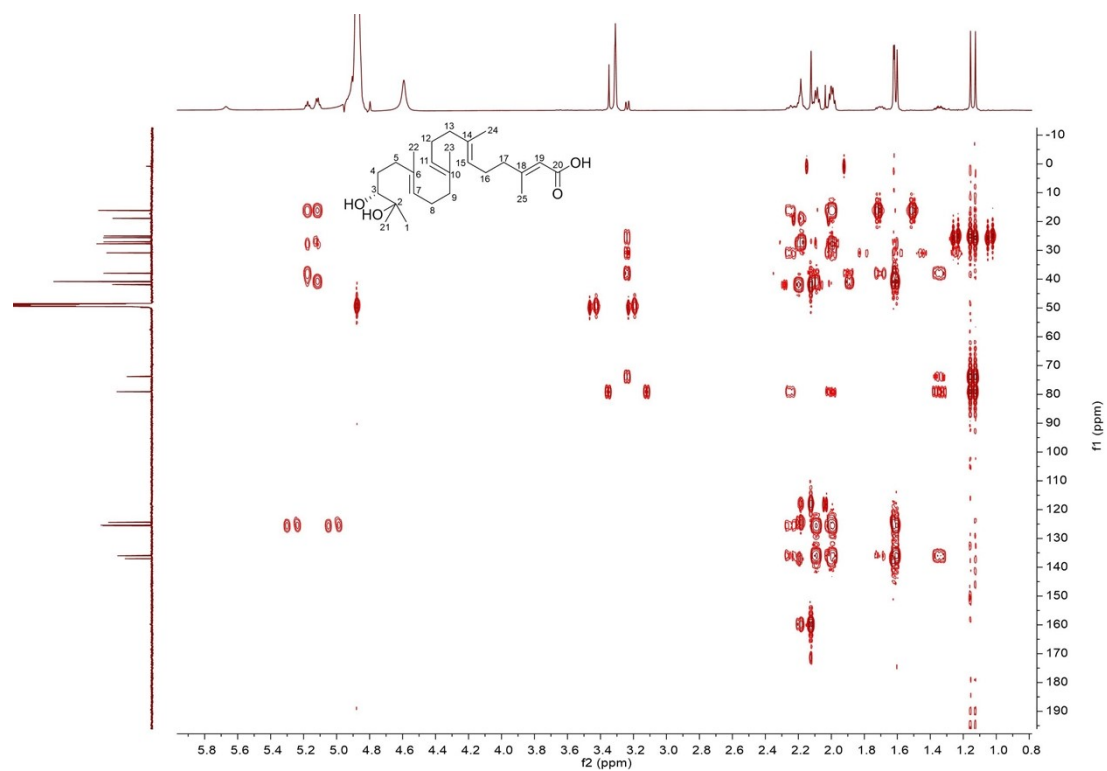

Figure S32. HMBC spectrum of **5** in methanol- $d_4$ .

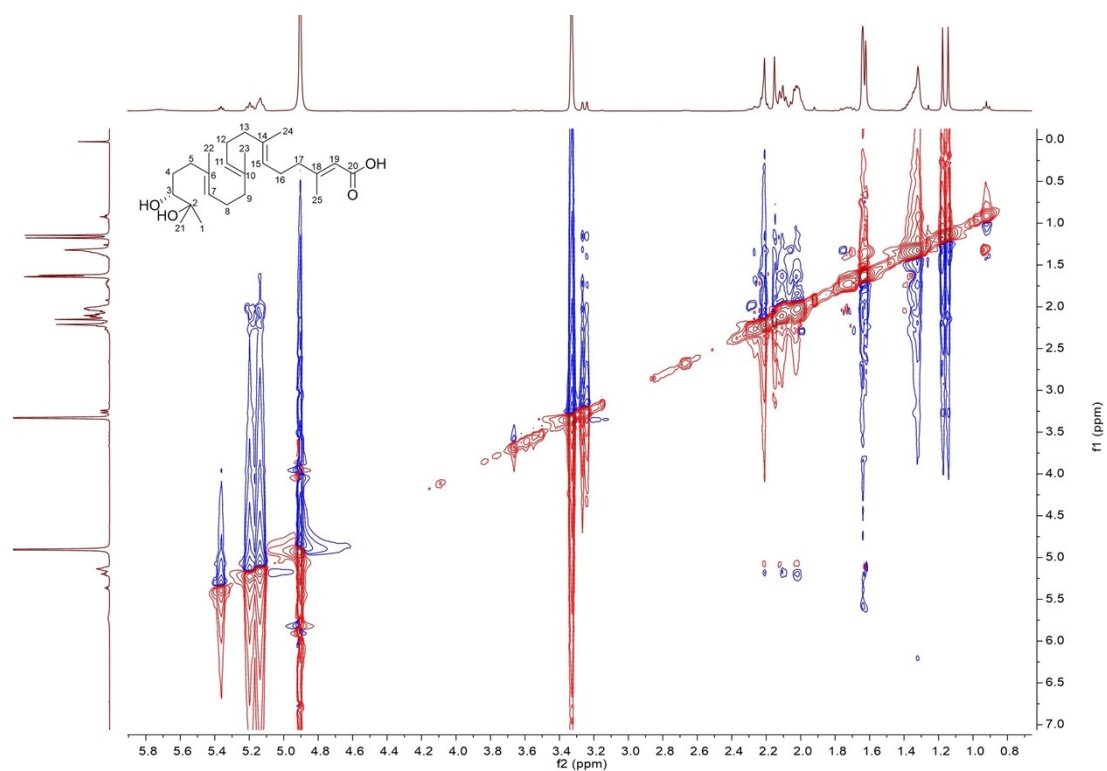

Figure S33. ROESY spectrum of **5** in methanol- $d_4$ .

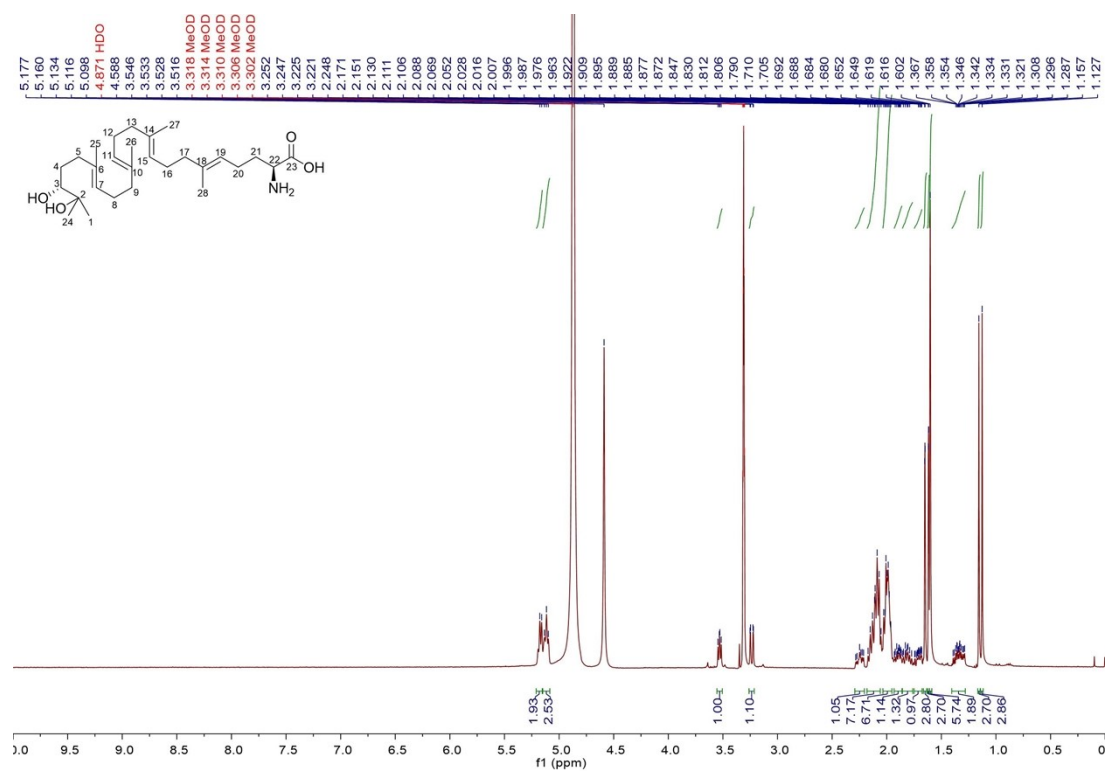

Figure S34.  $^1\text{H}$  NMR spectrum of **6** in methanol- $d_4$  (400 MHz).

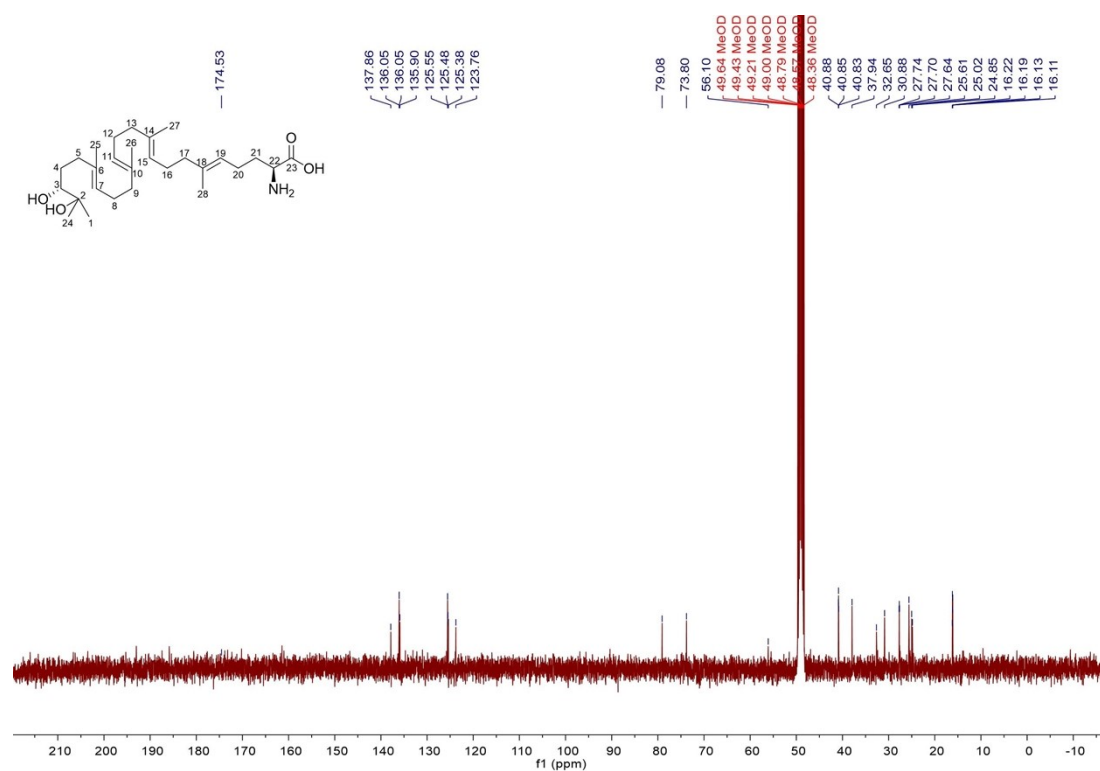

Figure S35.  $^{13}\text{C}$  NMR spectrum of 6 in methanol- $d_4$  (100 MHz).

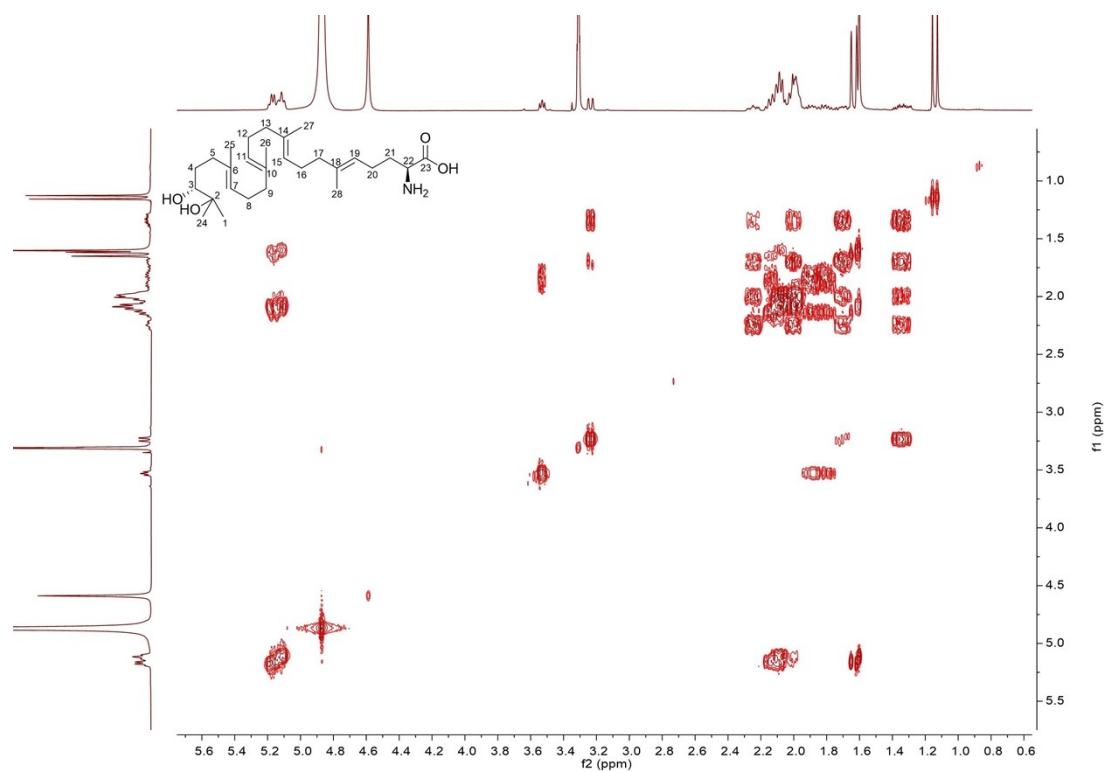

Figure S36.  $^1\text{H}$ - $^1\text{H}$  COSY spectrum of 6 in methanol- $d_4$ .

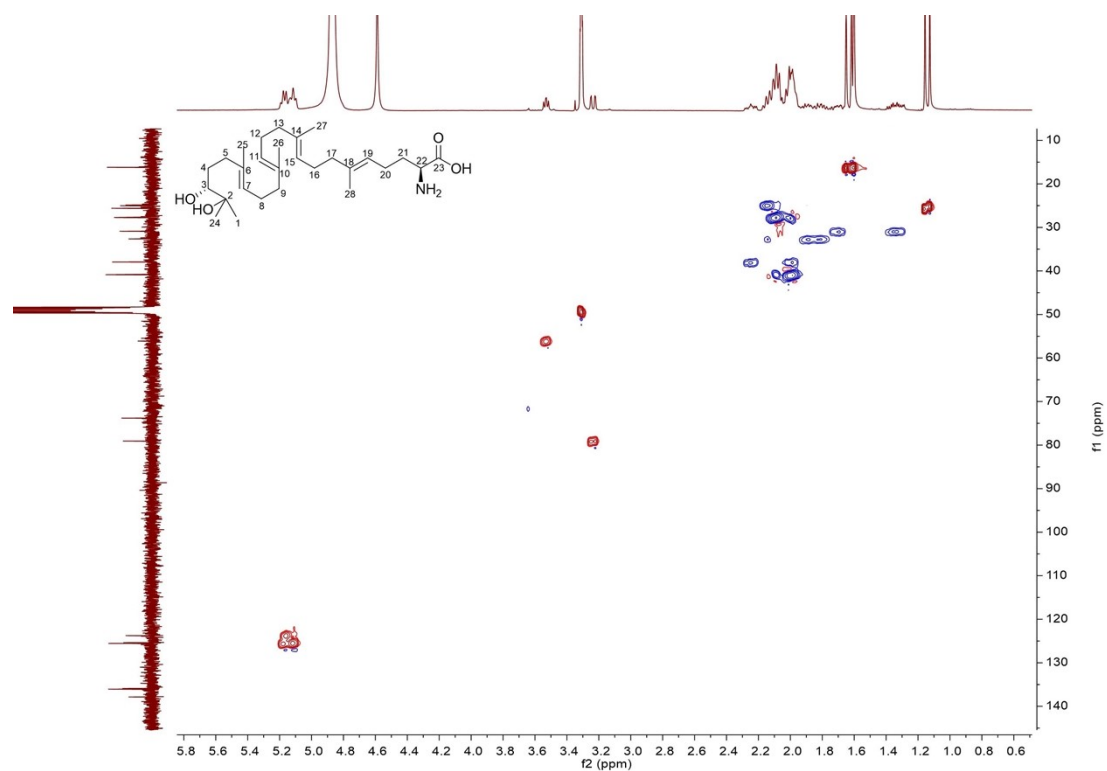

Figure S37. HSQC spectrum of 6 in methanol- $d_4$ .

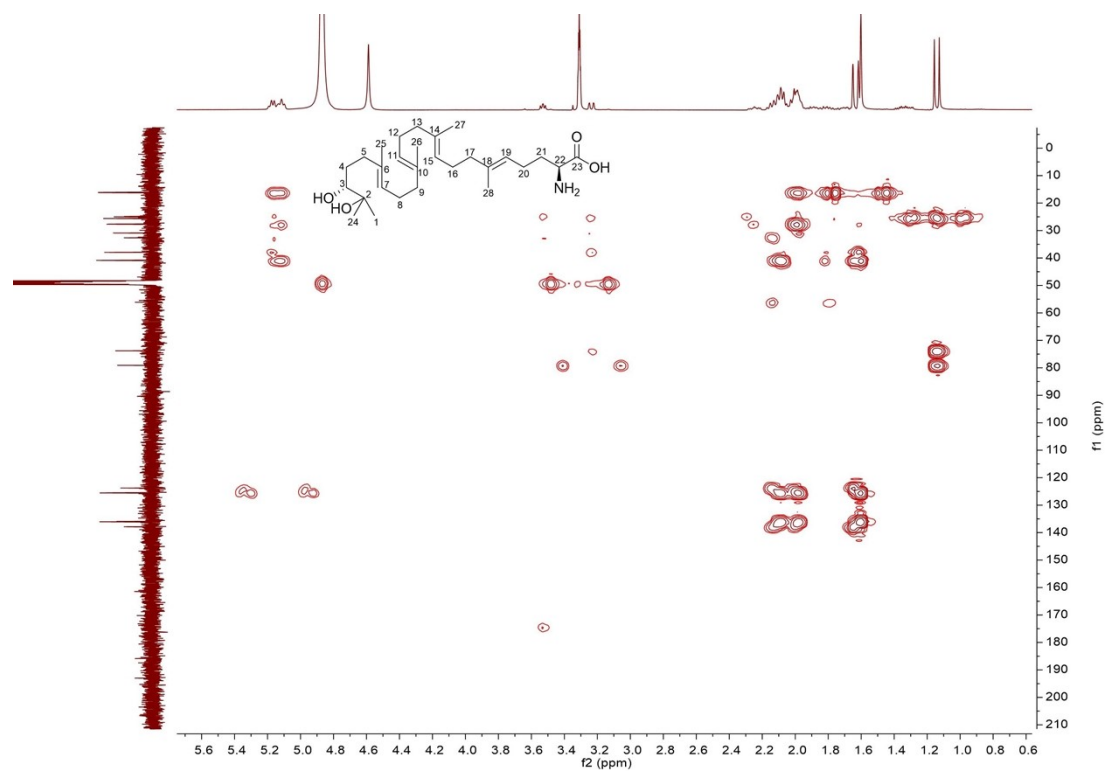

Figure S38. HMBC spectrum of 6 in methanol- $d_4$ .

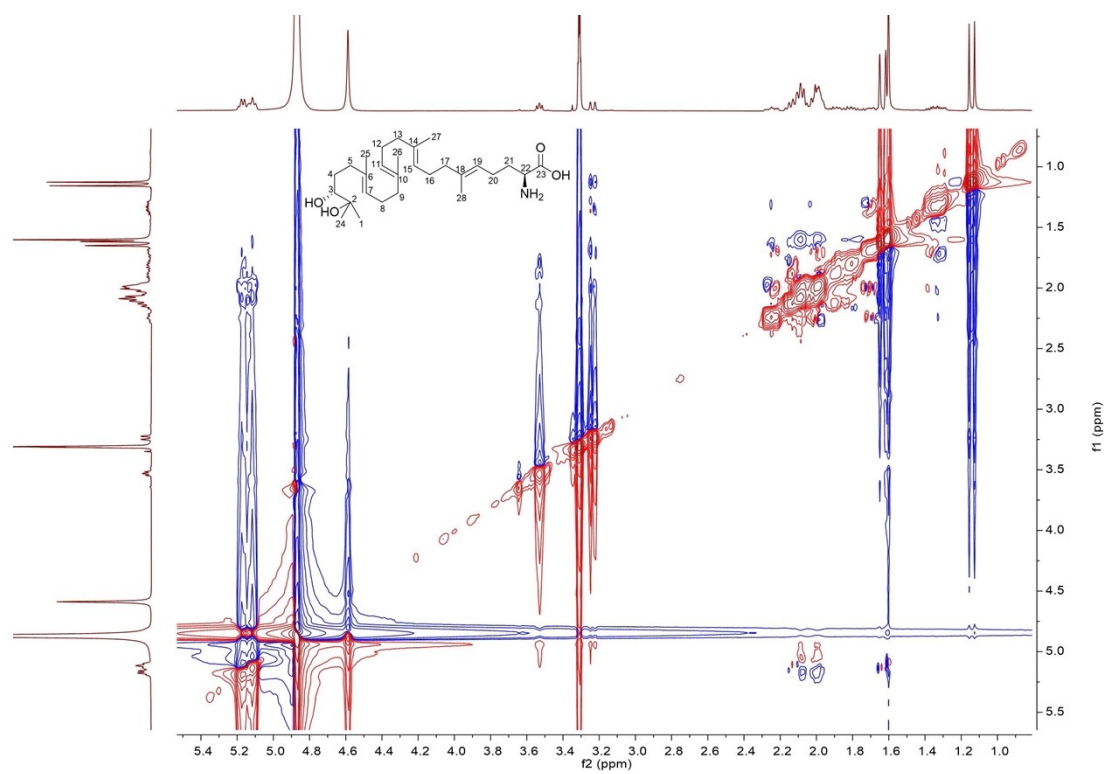

Figure S39. ROESY spectrum of **6** in methanol- $d_4$ .



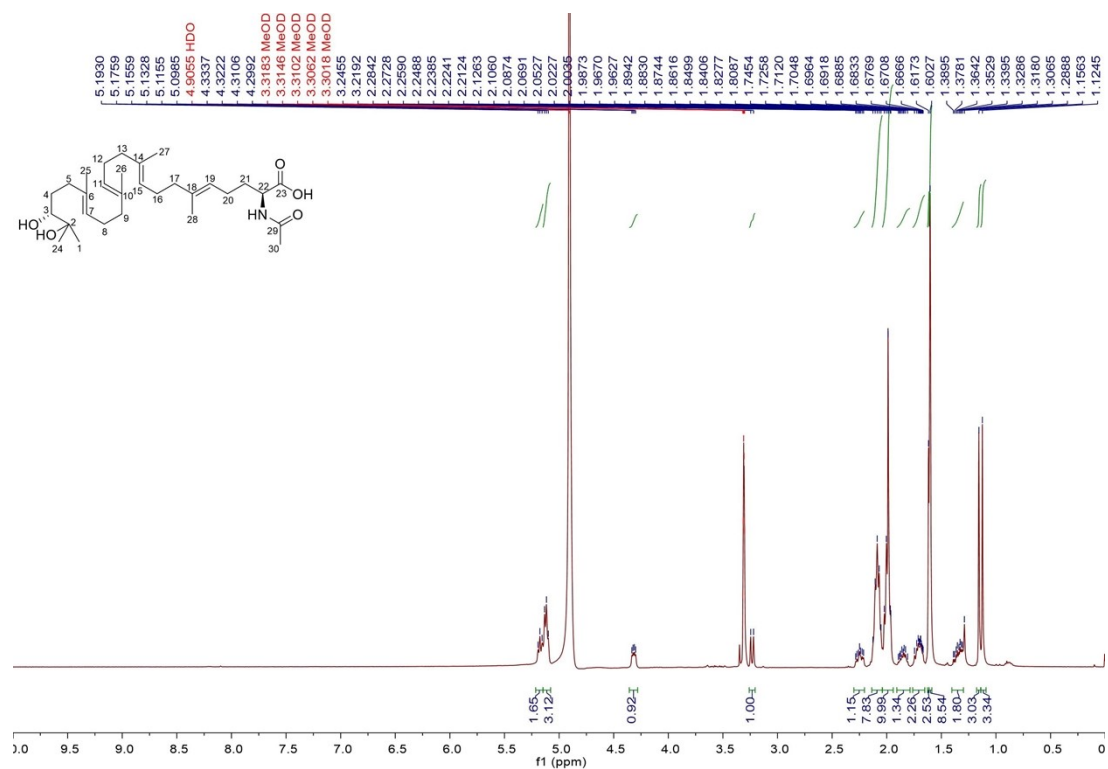

Figure S41. <sup>1</sup>H NMR spectrum of 7 in methanol-d<sub>4</sub> (400 MHz).

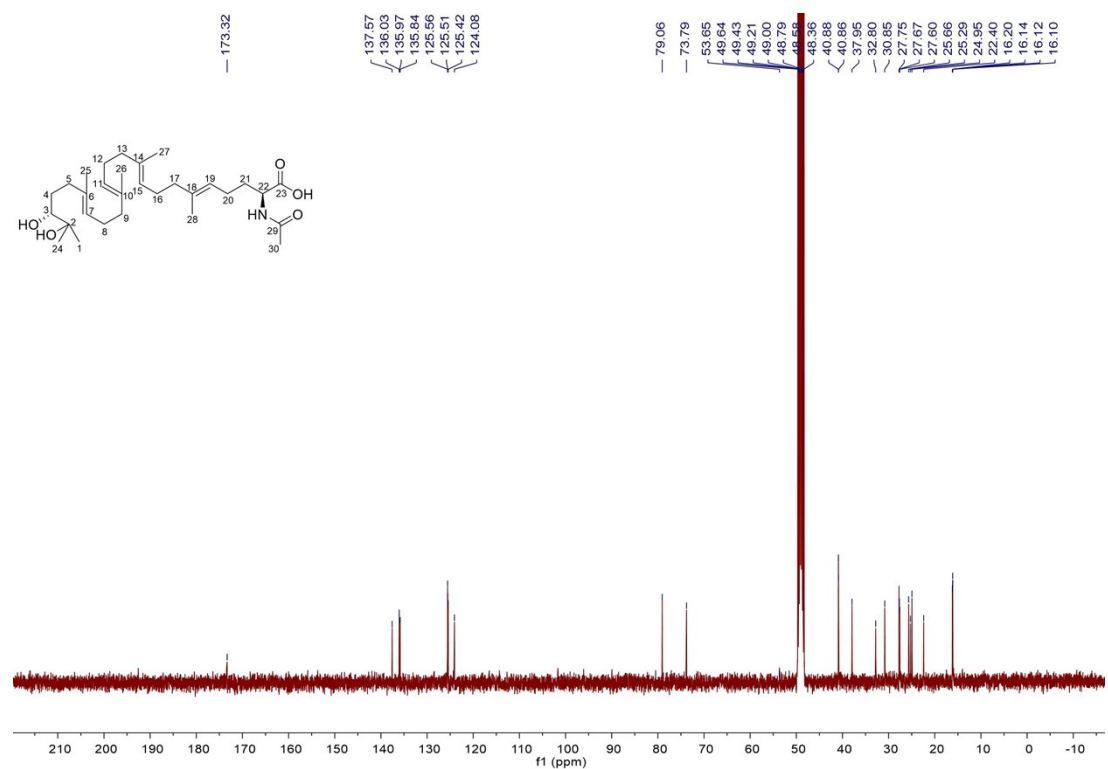

Figure S42. <sup>13</sup>C NMR spectrum of 7 in methanol-d<sub>4</sub> (100 MHz).



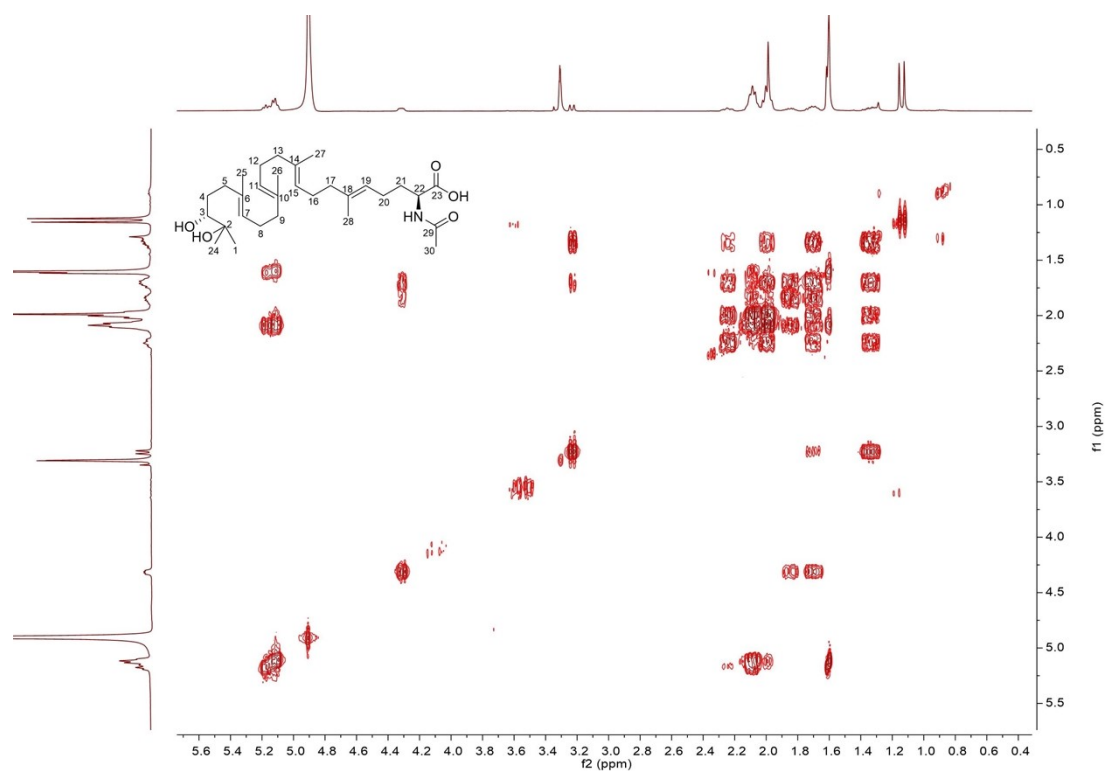

Figure S43.  $^1\text{H}$ - $^1\text{H}$  COSY spectrum of **7** in methanol- $d_4$ .

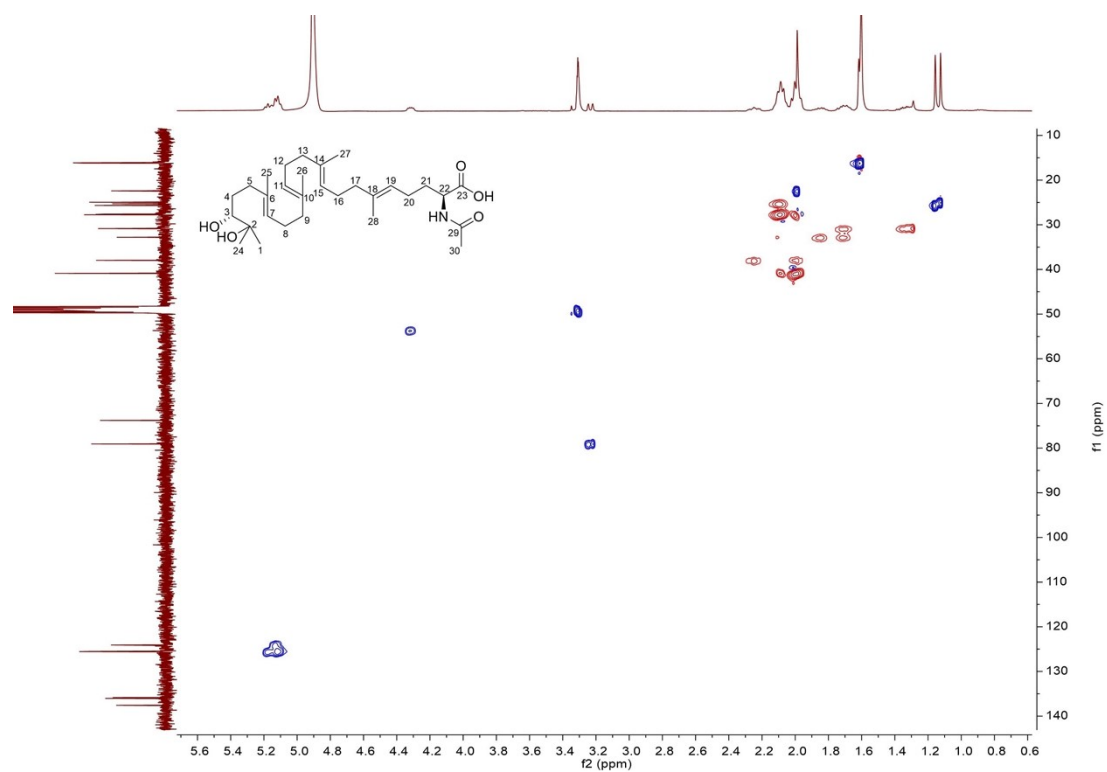

Figure S44. HSQC spectrum of **7** in methanol- $d_4$ .

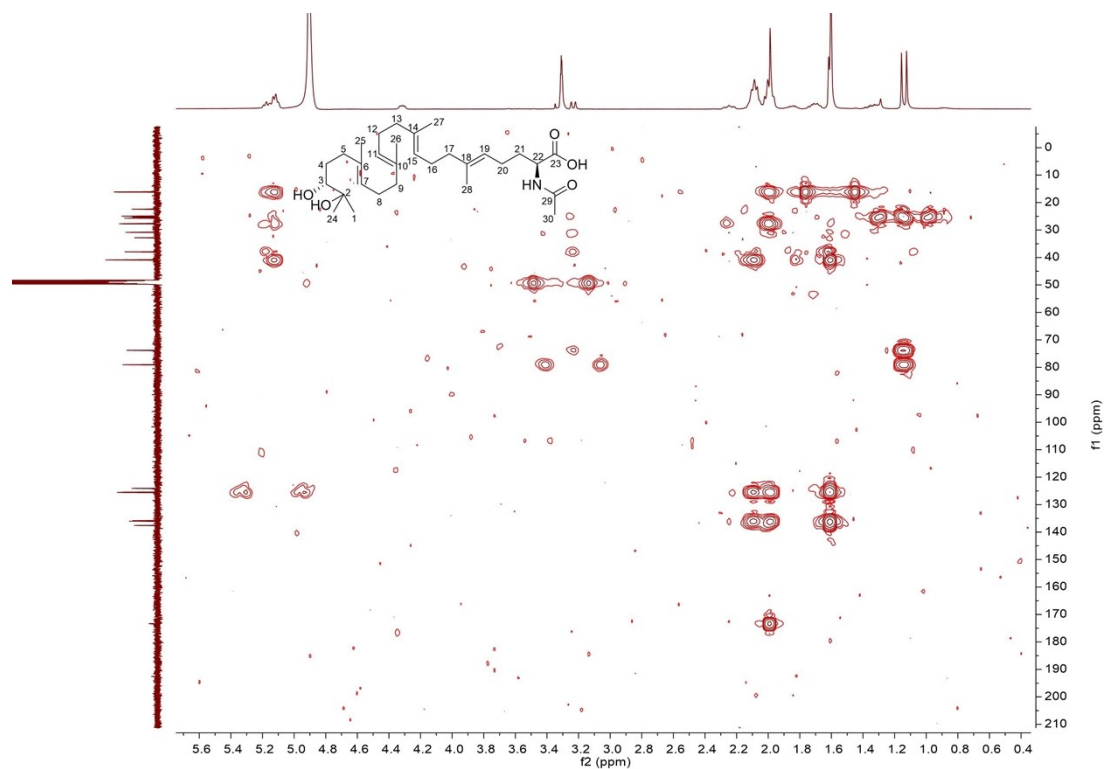

Figure S45. HMBC spectrum of 7 in methanol- $d_4$ .

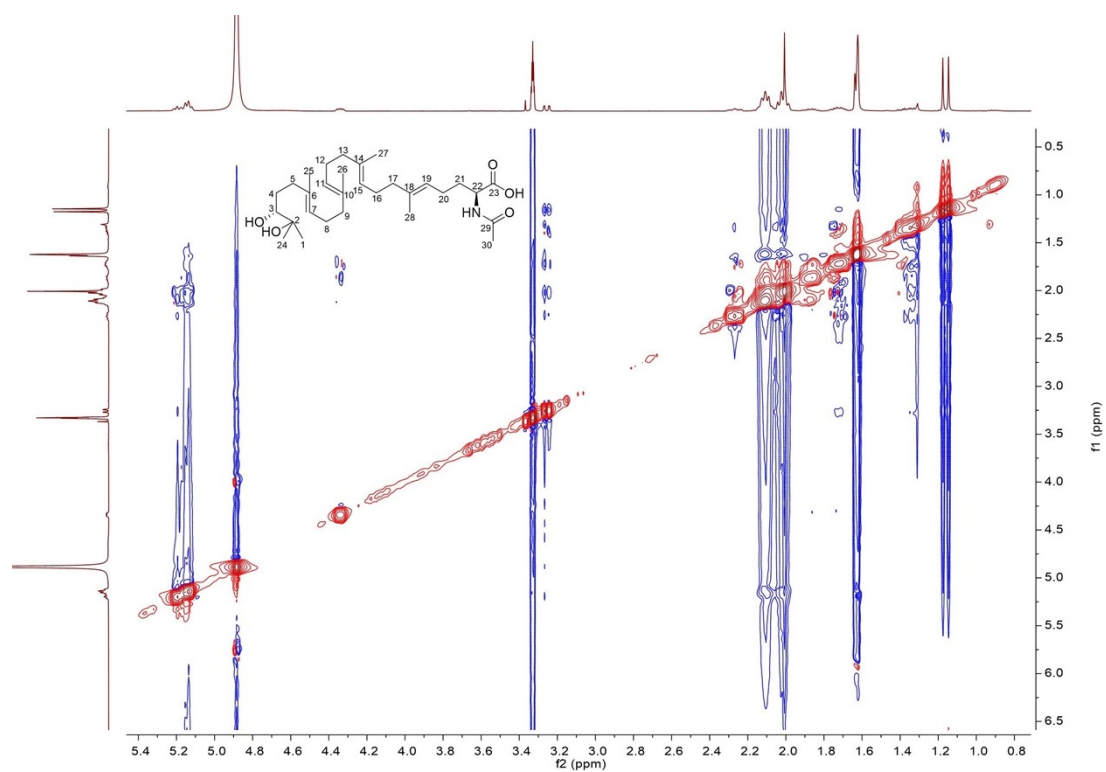

Figure S46. ROESY spectrum of 7 in methanol- $d_4$ .



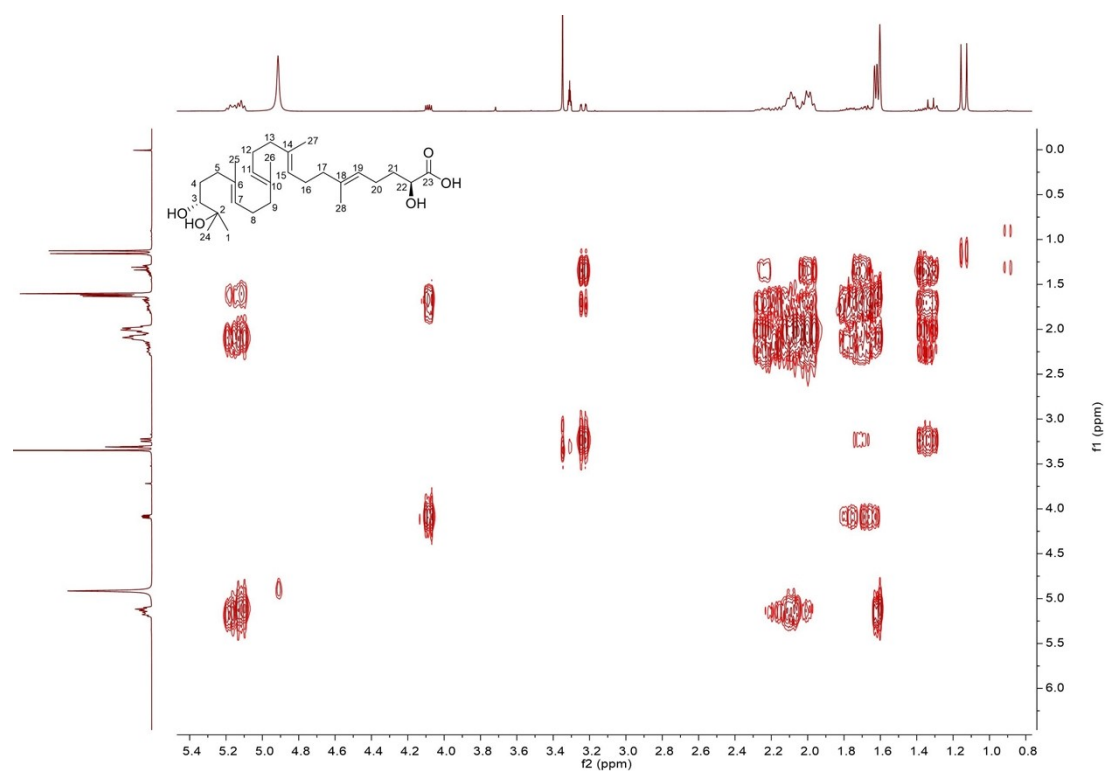

Figure S49.  $^1\text{H}$ - $^1\text{H}$  COSY spectrum of **8** in methanol- $d_4$ .

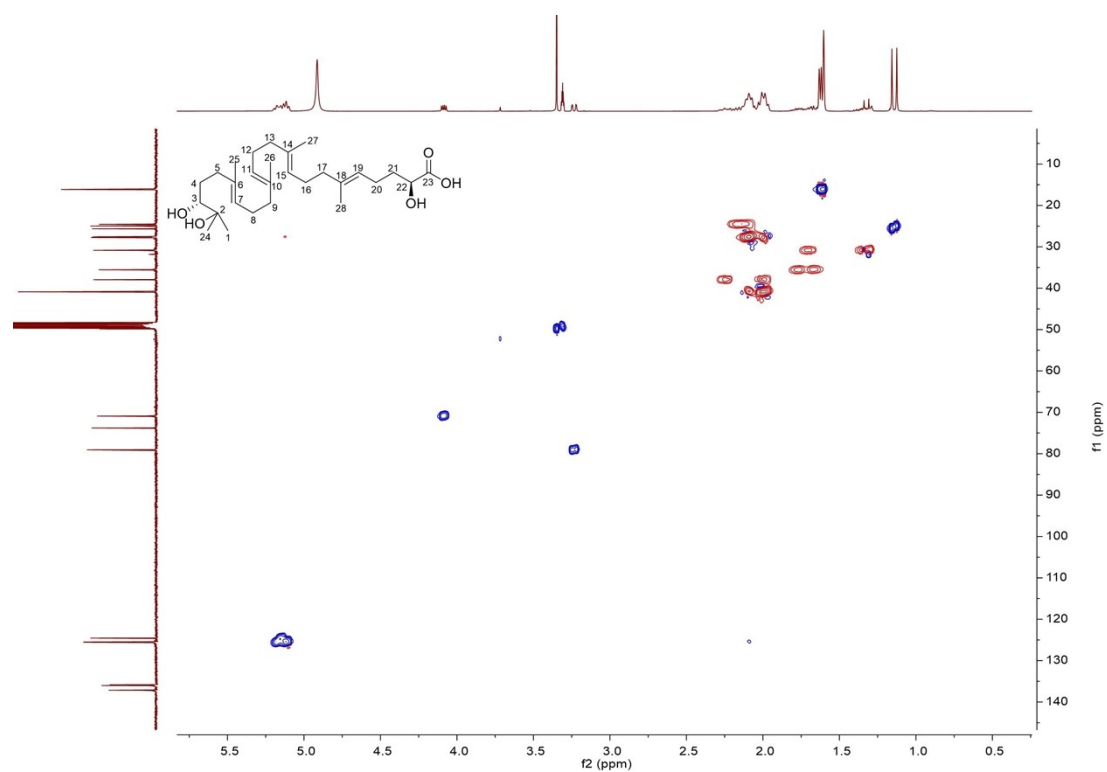

Figure S50. HSQC spectrum of **8** in methanol- $d_4$ .

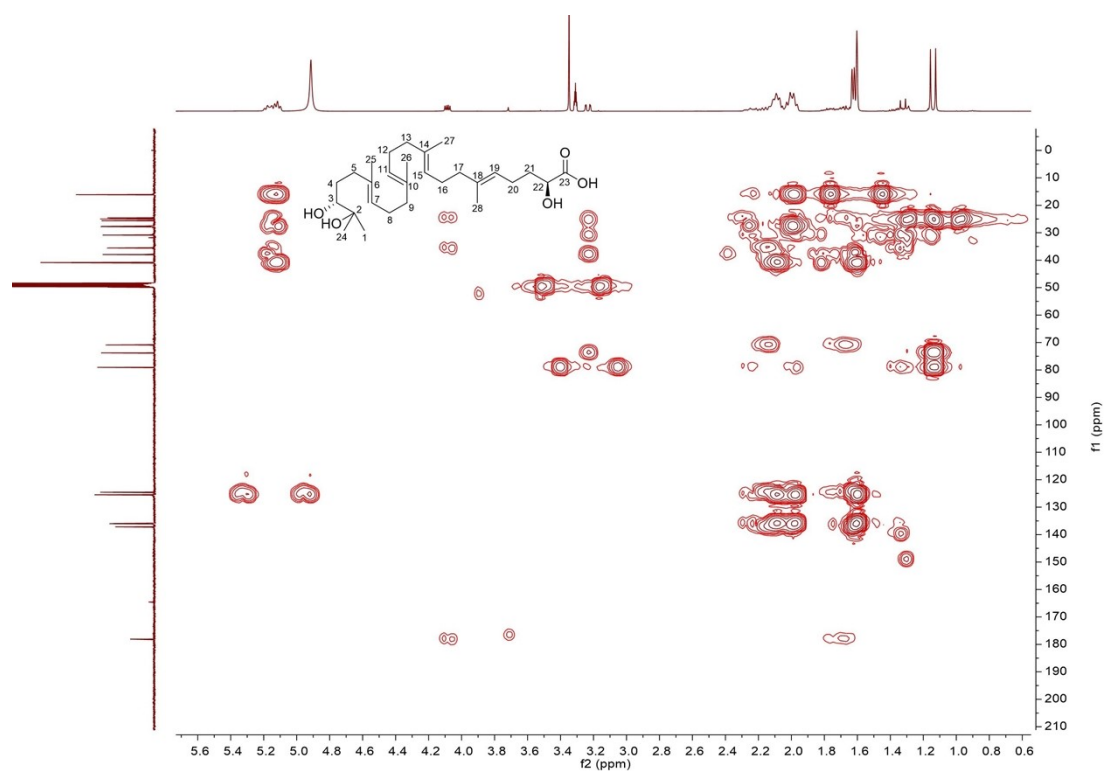

Figure S51. HMBC spectrum of **8** in methanol- $d_4$ .

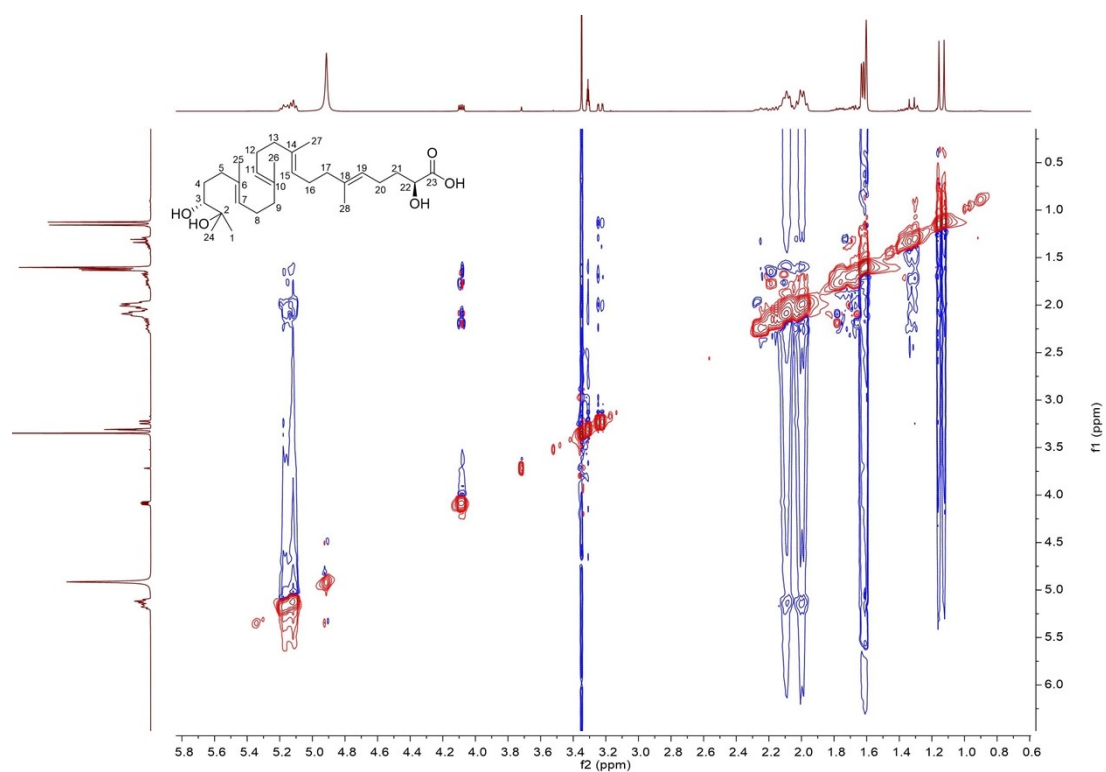

Figure S52. ROESY spectrum of **8** in methanol- $d_4$ .

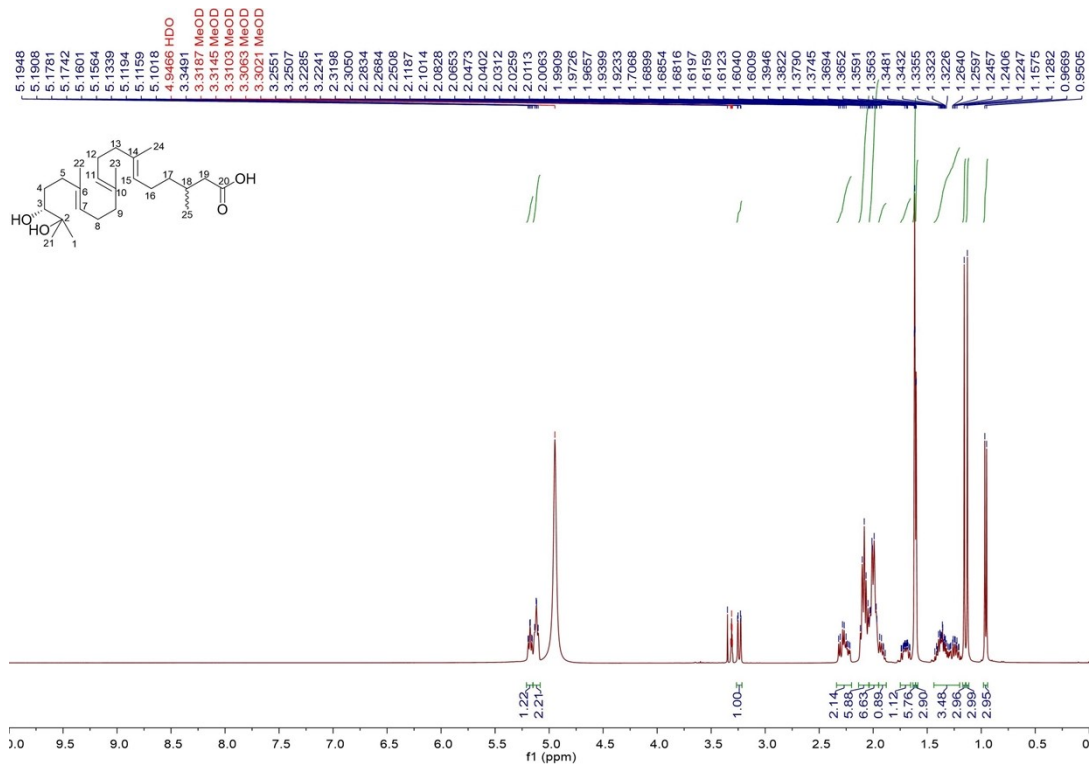

Figure S53. <sup>1</sup>H NMR spectrum of 9 in methanol-d<sub>4</sub> (400 MHz).

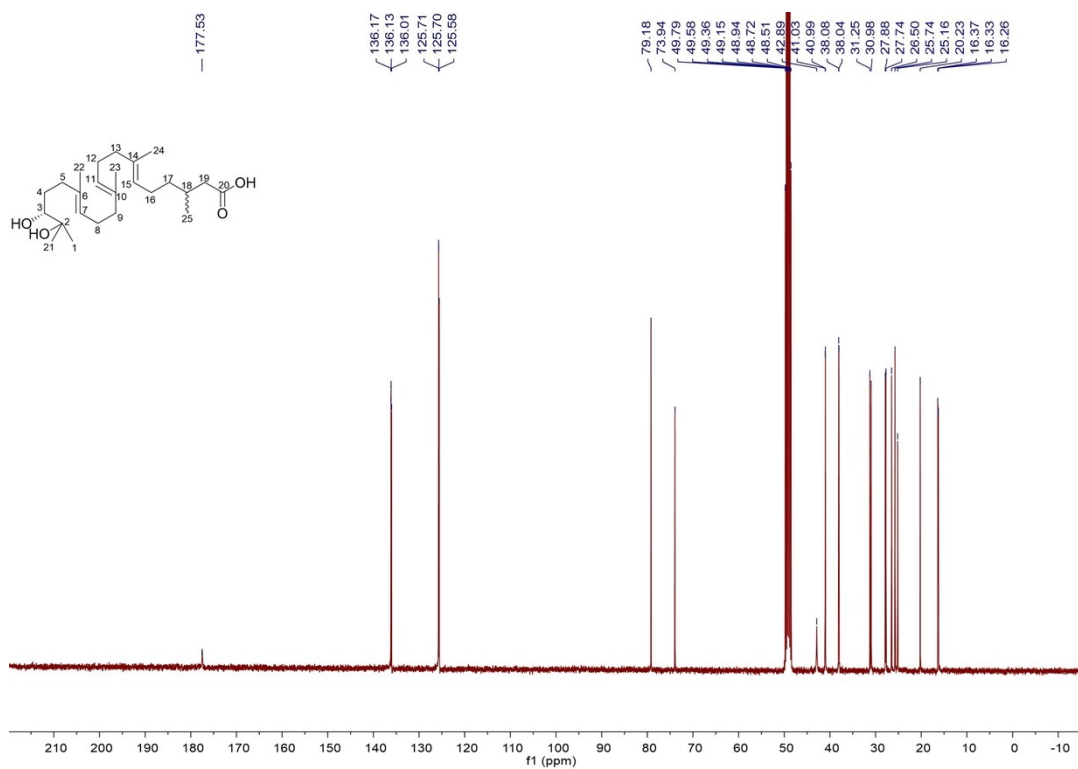

Figure S54. <sup>13</sup>C NMR spectrum of 9 in methanol-d<sub>4</sub> (100 MHz).

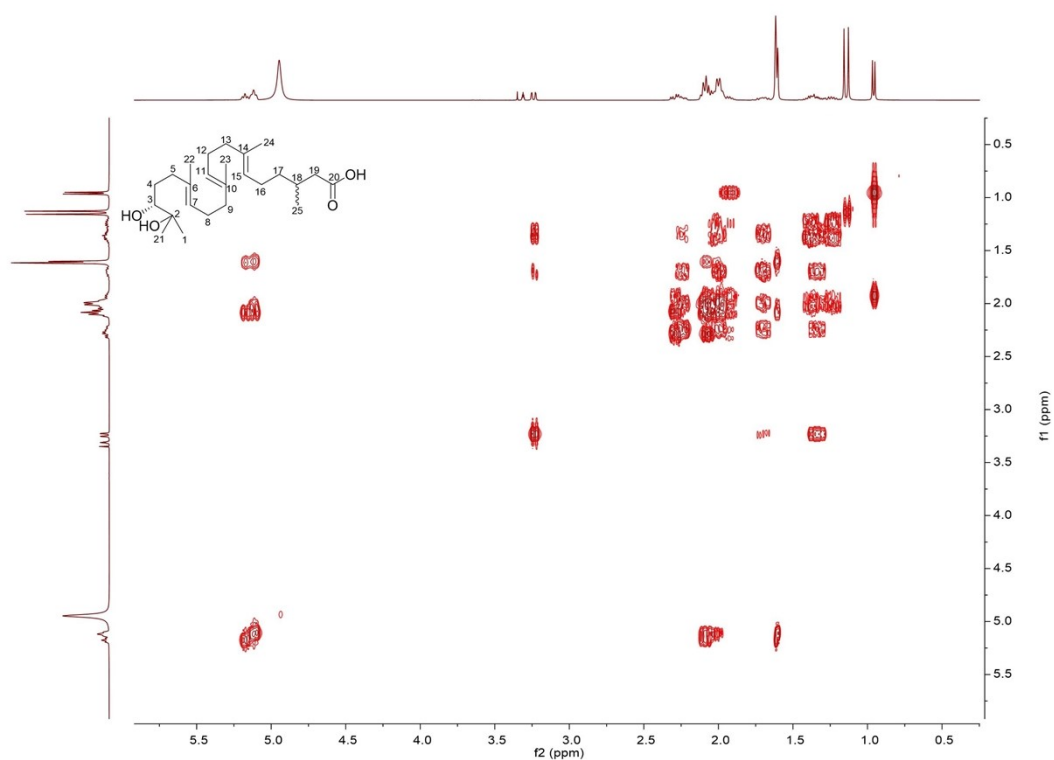

Figure S55.  $^1\text{H}$ - $^1\text{H}$  COSY spectrum of **9** in methanol- $d_4$ .

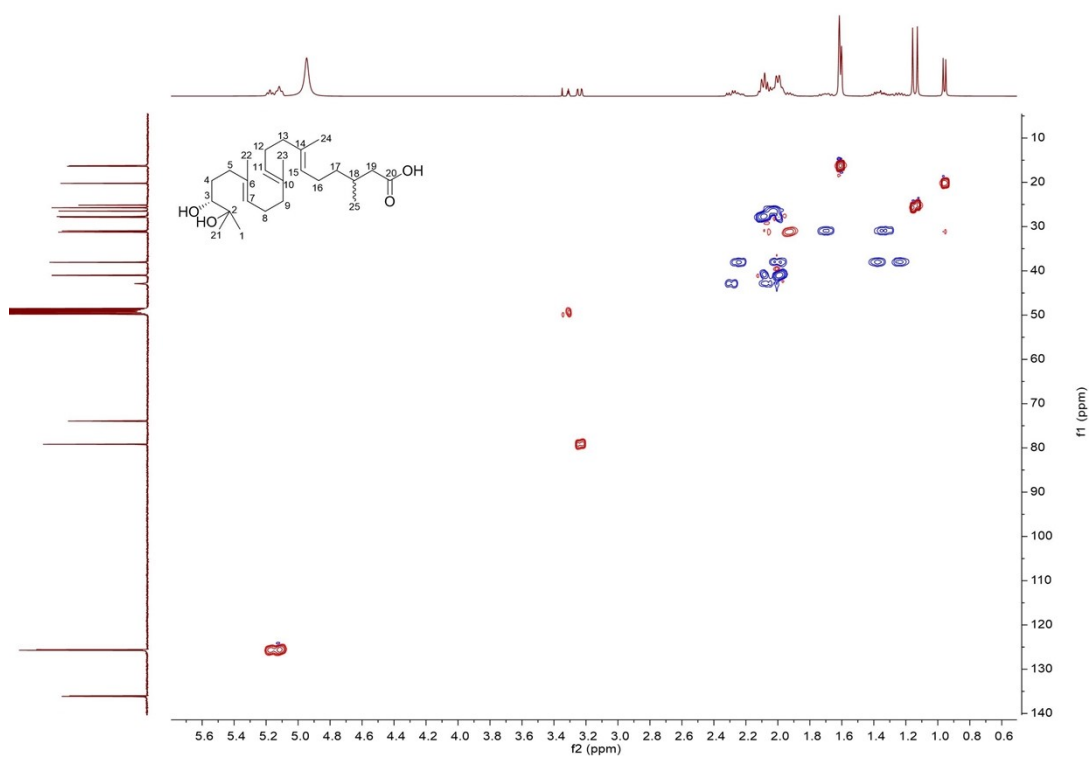

Figure S56. HSQC spectrum of **9** in methanol- $d_4$ .

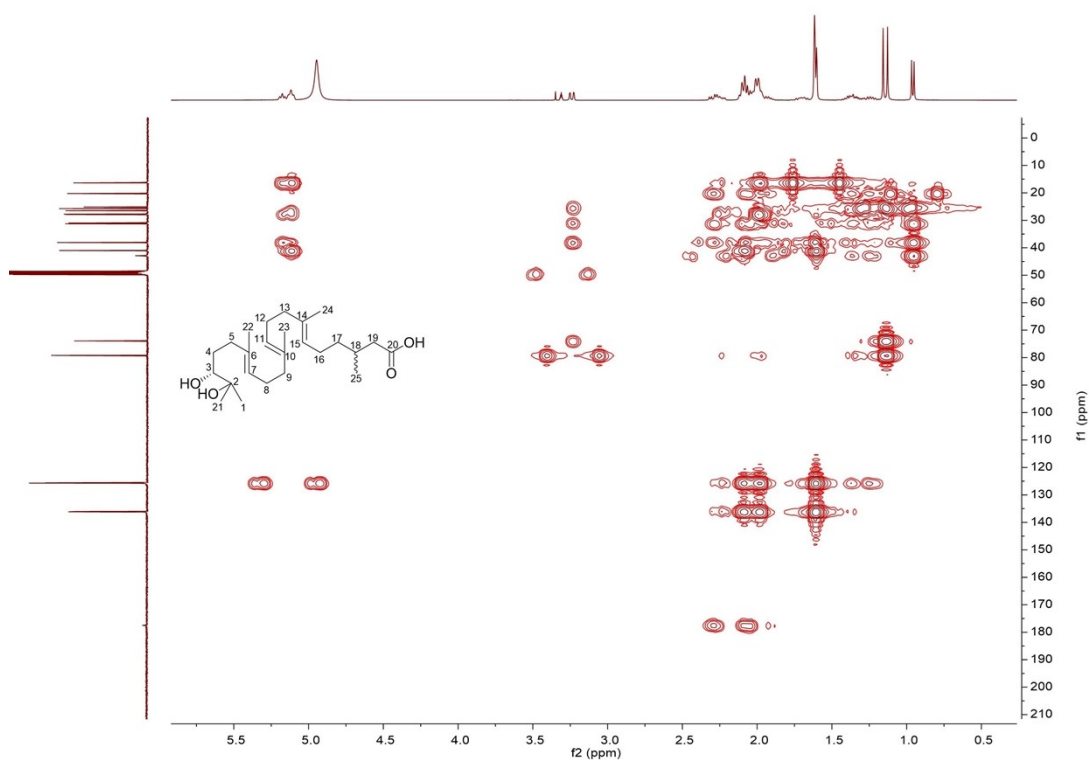

Figure S57. HMBC spectrum of **9** in methanol- $d_4$ .

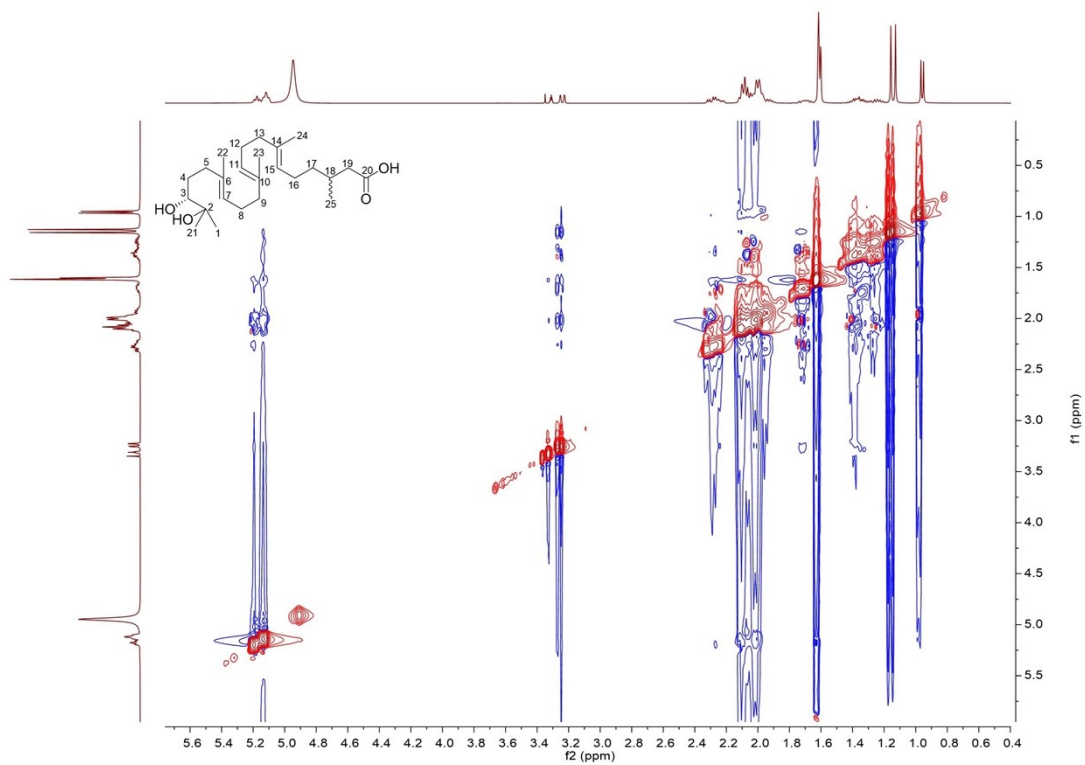

Figure S58. ROESY spectrum of **9** in methanol- $d_4$ .



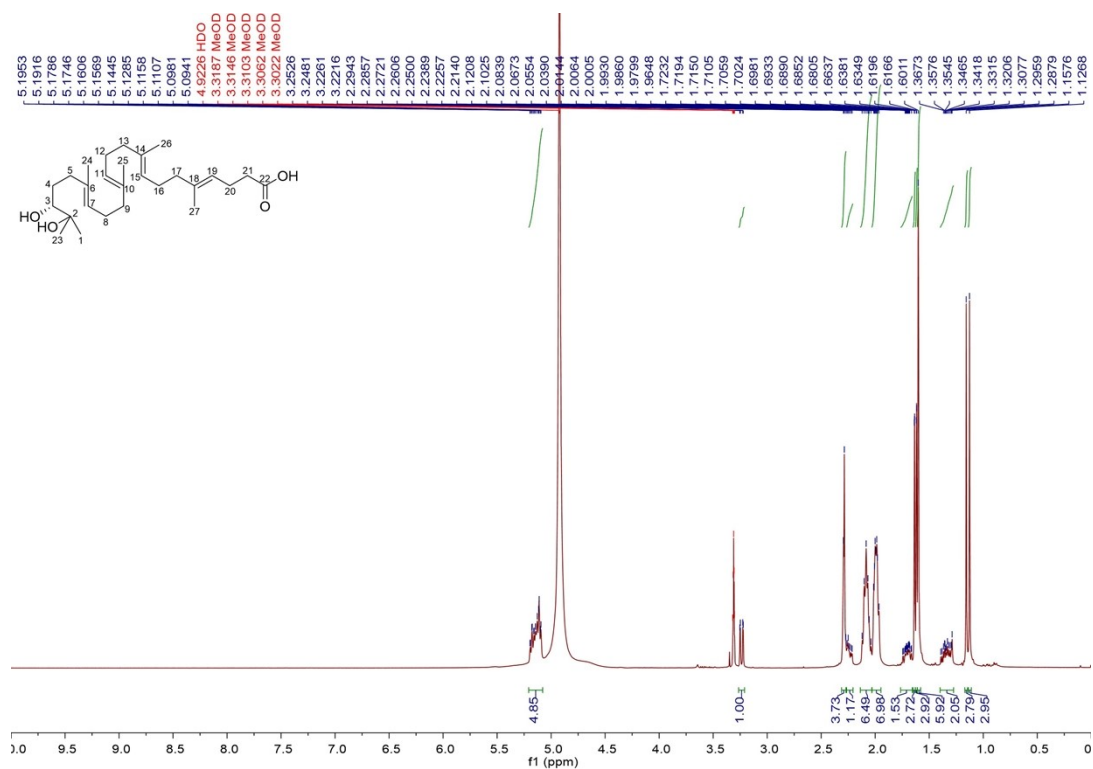

Figure S59. <sup>1</sup>H NMR spectrum of **10** in methanol-d<sub>4</sub> (400 MHz).

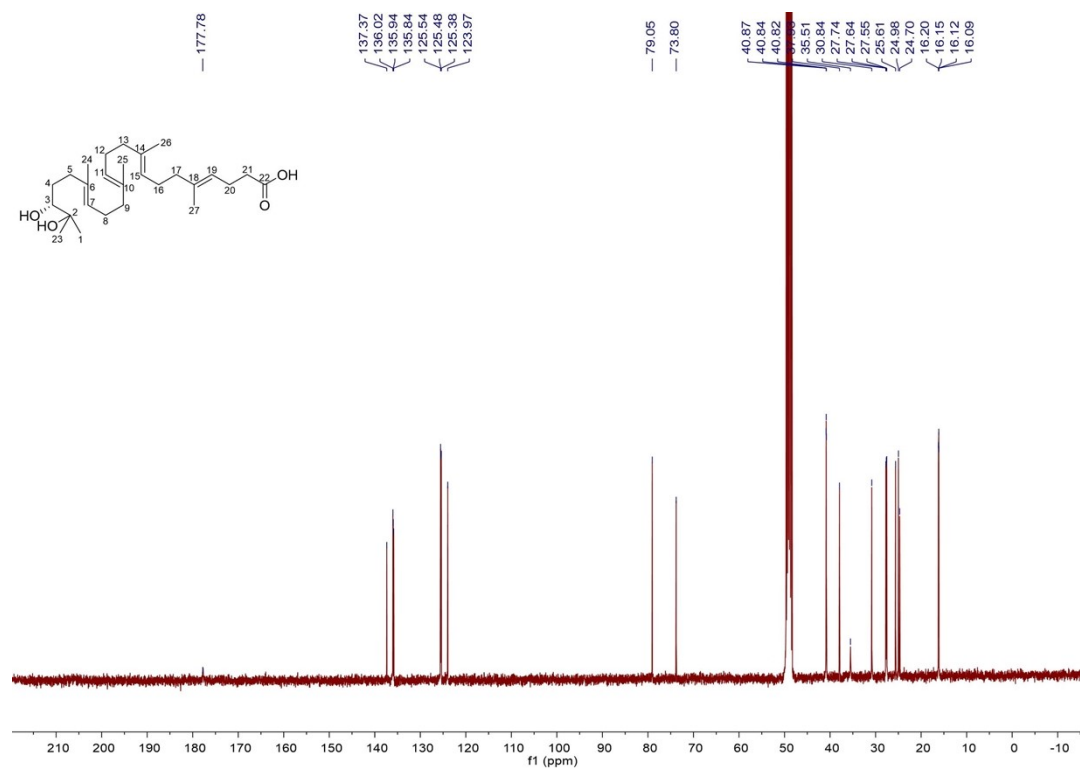

Figure S60. <sup>13</sup>C NMR spectrum of **10** in methanol-d<sub>4</sub> (100 MHz).

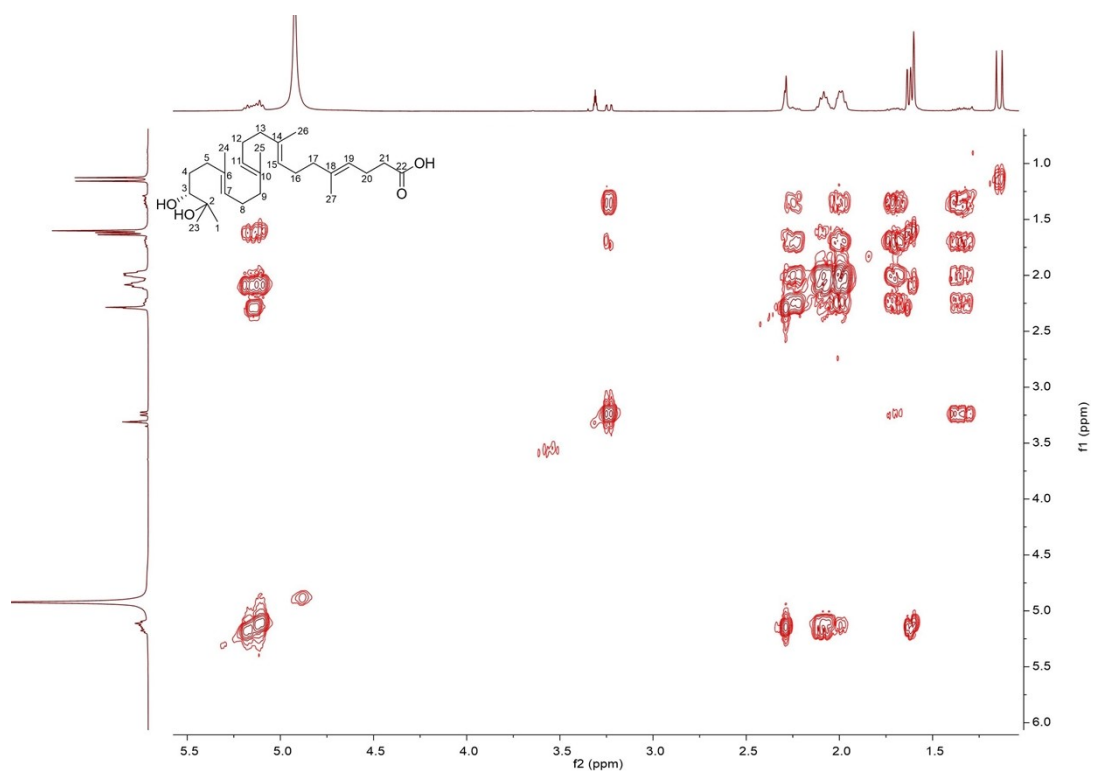

Figure S61.  $^1\text{H}$ - $^1\text{H}$  COSY spectrum of **10** in methanol- $d_4$ .

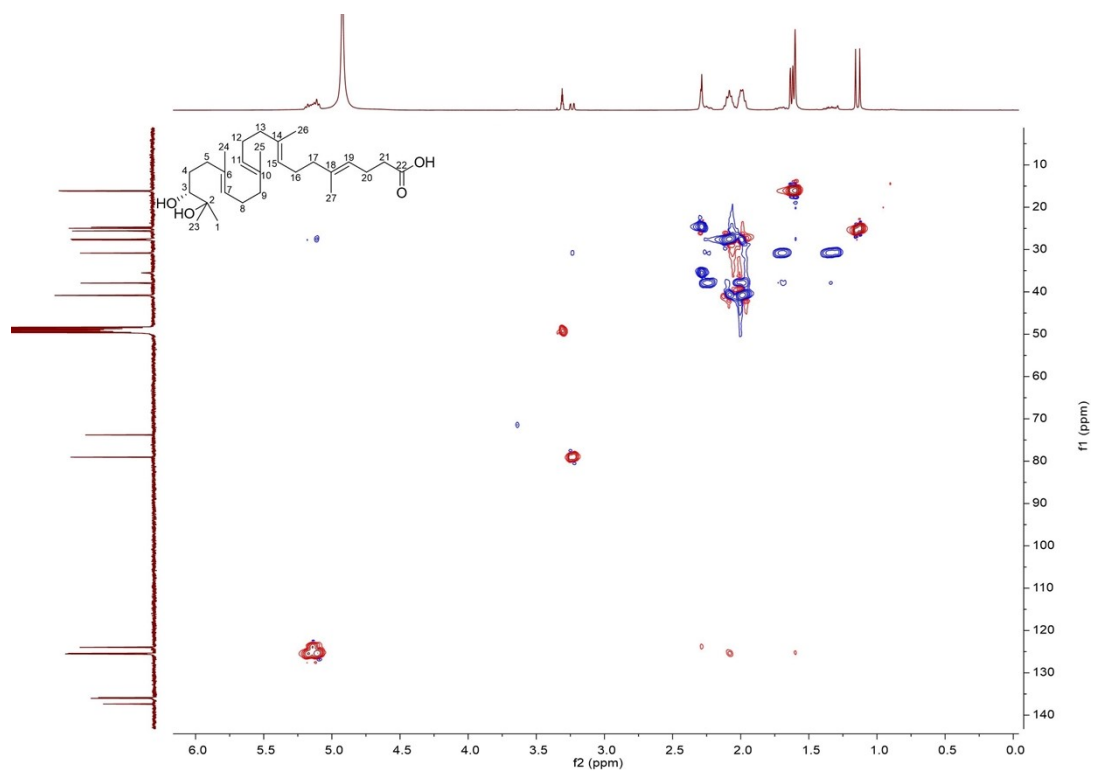

Figure S62. HSQC spectrum of **10** in methanol- $d_4$ .

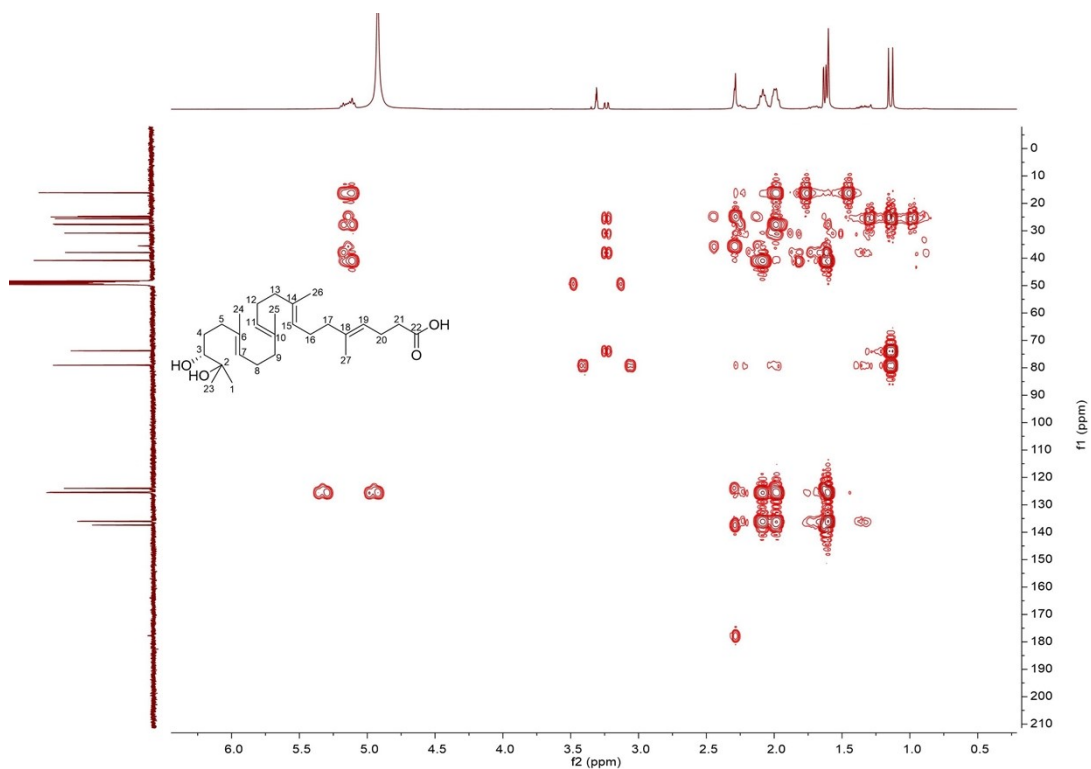

Figure S63. HMBC spectrum of **10** in methanol- $d_4$ .

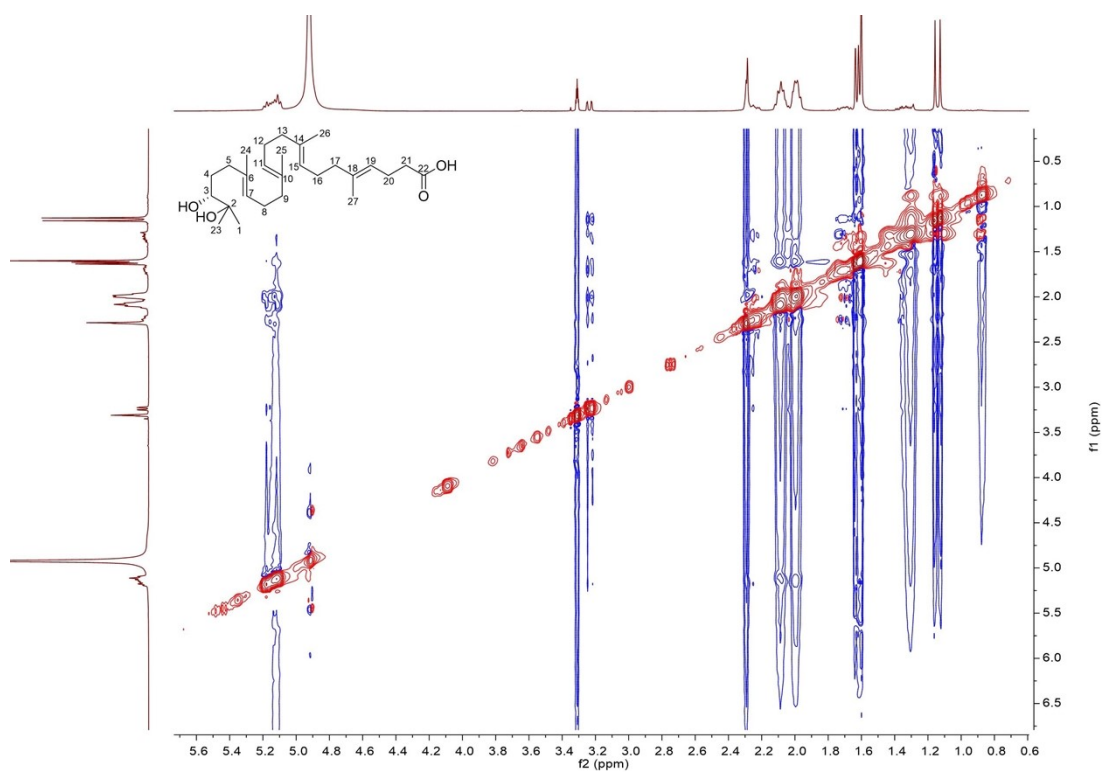

Figure S64. ROESY spectrum of **10** in methanol- $d_4$ .

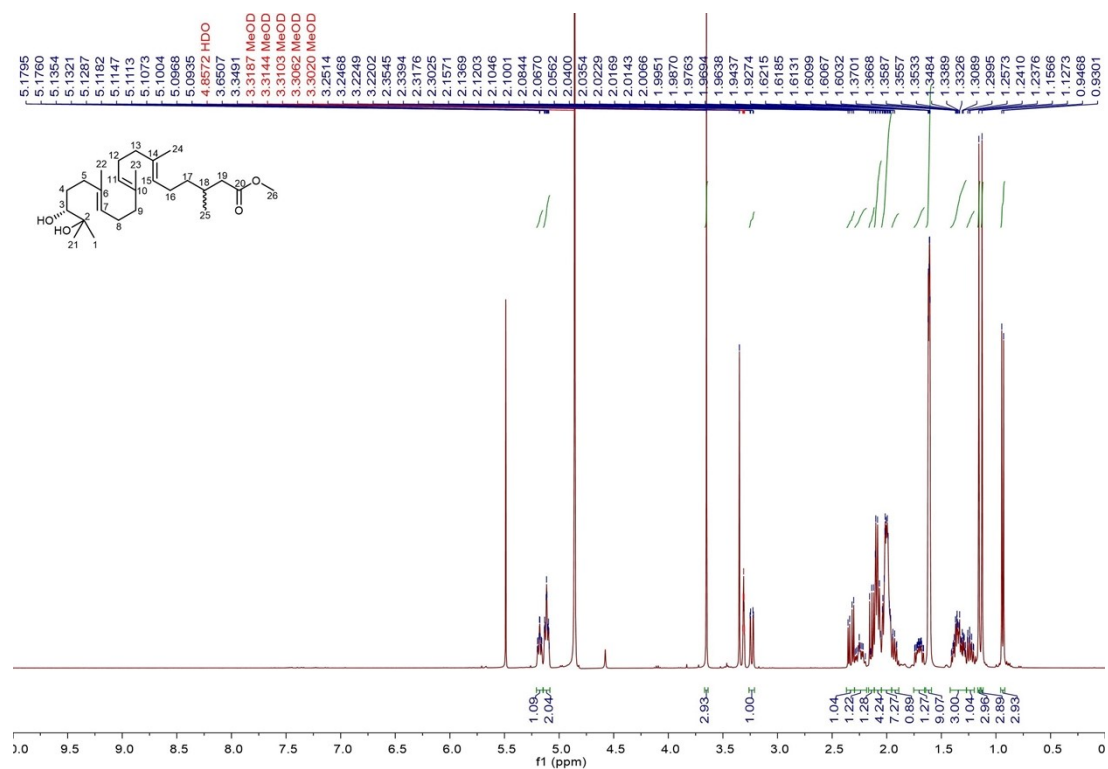

Figure S65. <sup>1</sup>H NMR spectrum of **9a** in methanol-d<sub>4</sub> (400 MHz).

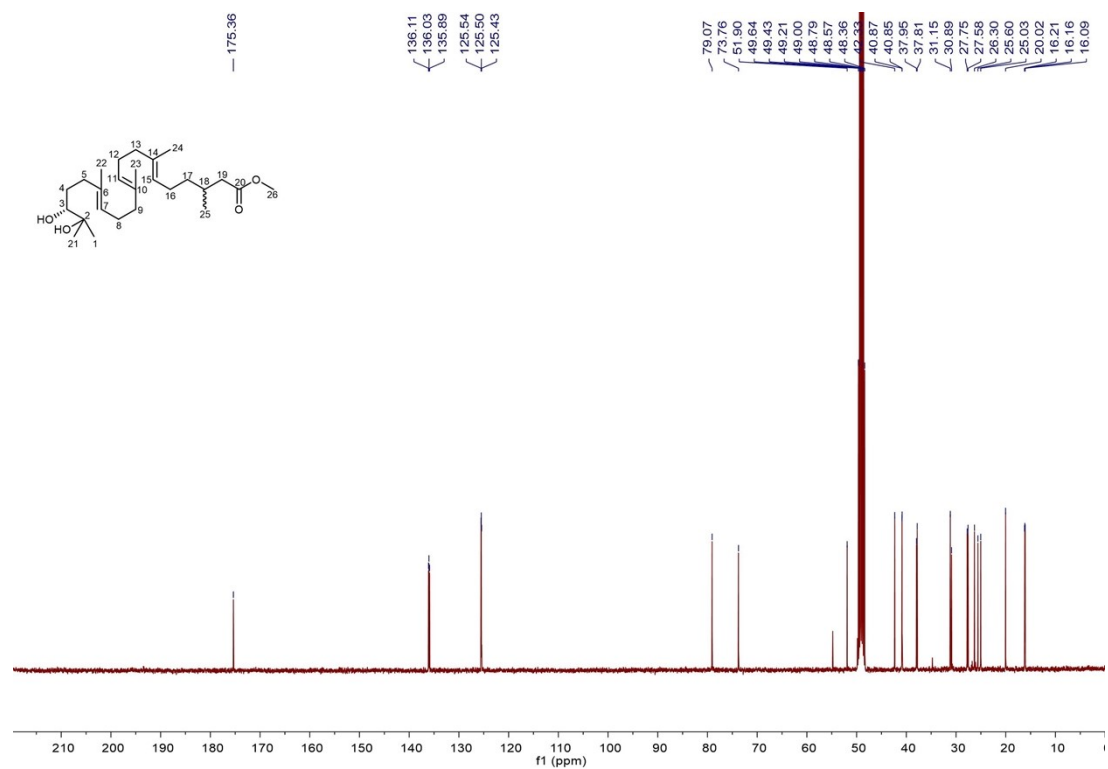

Figure S66. <sup>13</sup>C NMR spectrum of **9a** in methanol-d<sub>4</sub> (100 MHz).

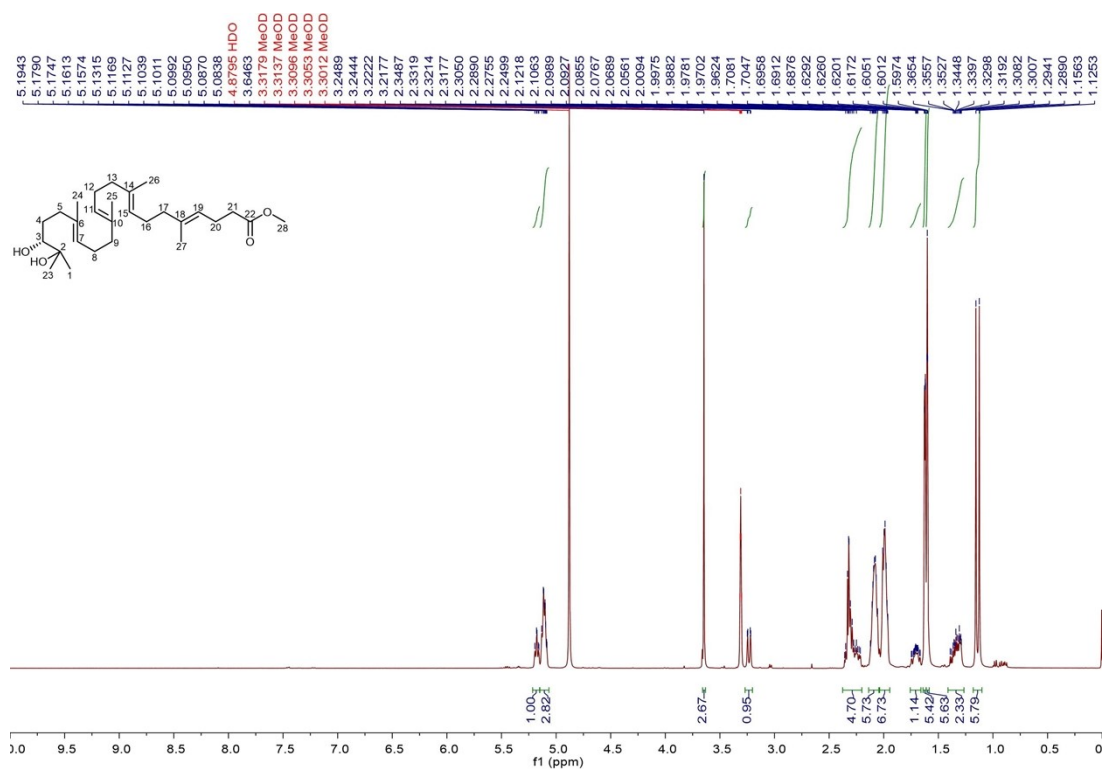

Figure S67. <sup>1</sup>H NMR spectrum of **10b** in methanol-*d*<sub>4</sub> (400 MHz).

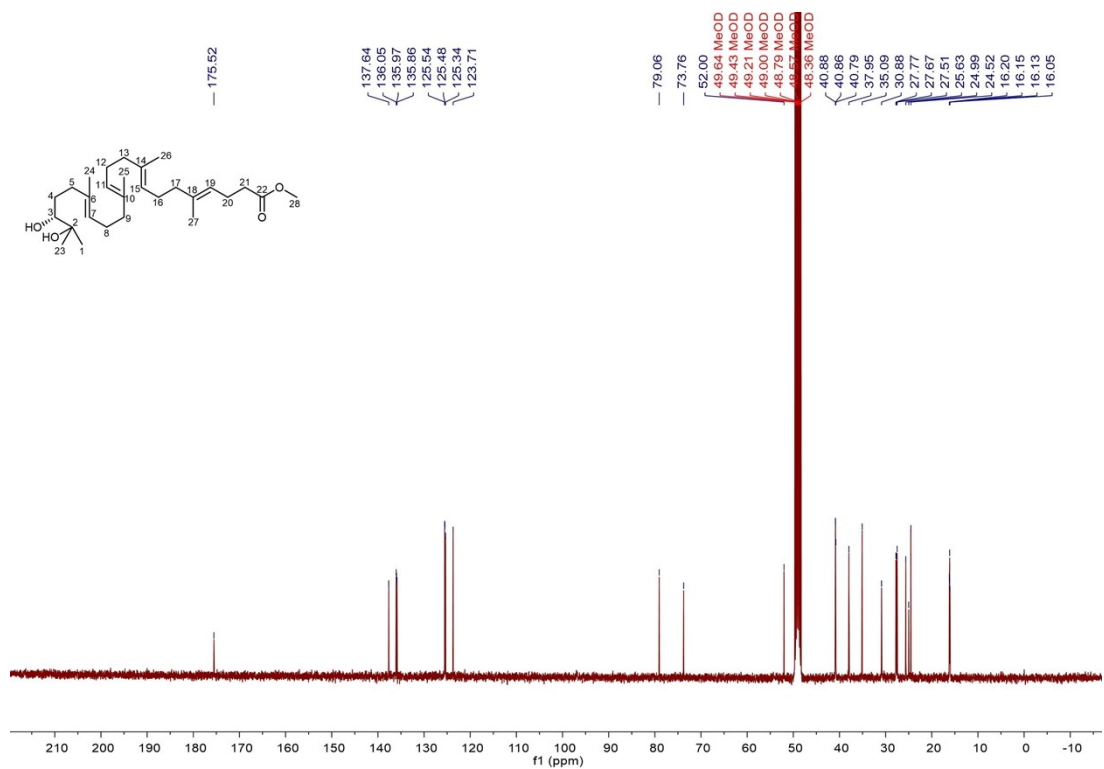

Figure S68. <sup>13</sup>C NMR spectrum of **10b** in methanol-*d*<sub>4</sub> (100 MHz).

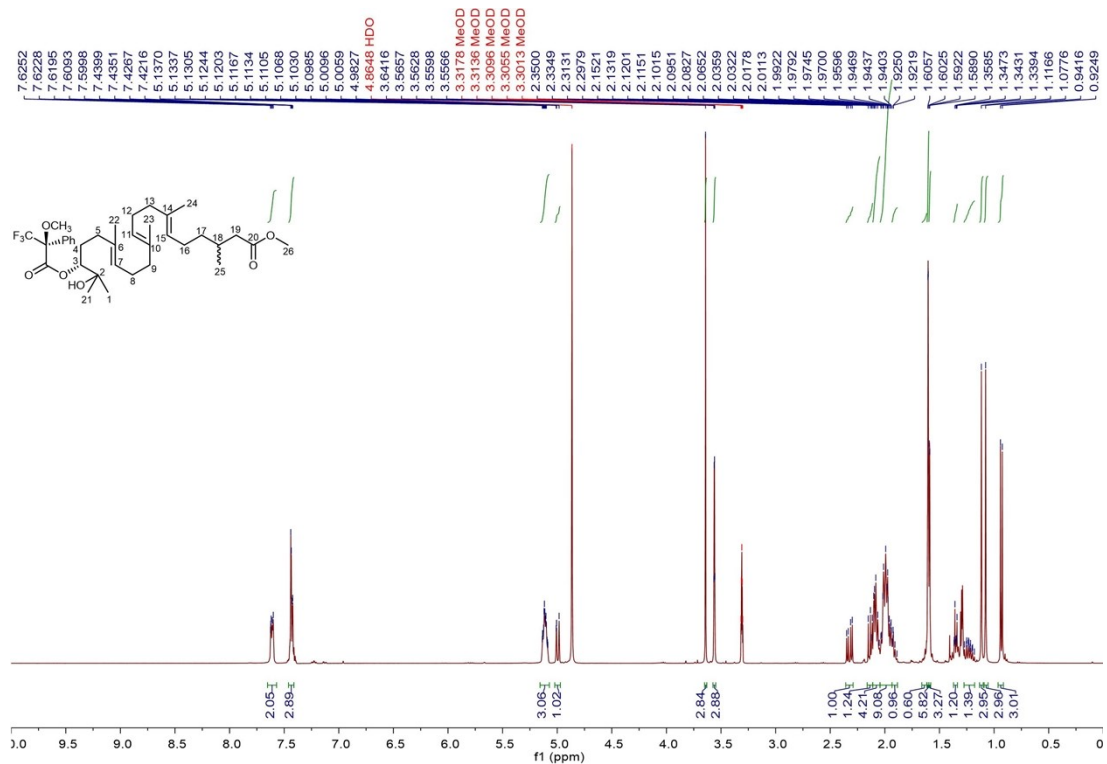

**Figure S69.**  $^1\text{H}$  NMR spectrum of **9b** in methanol- $d_4$  (400 MHz).

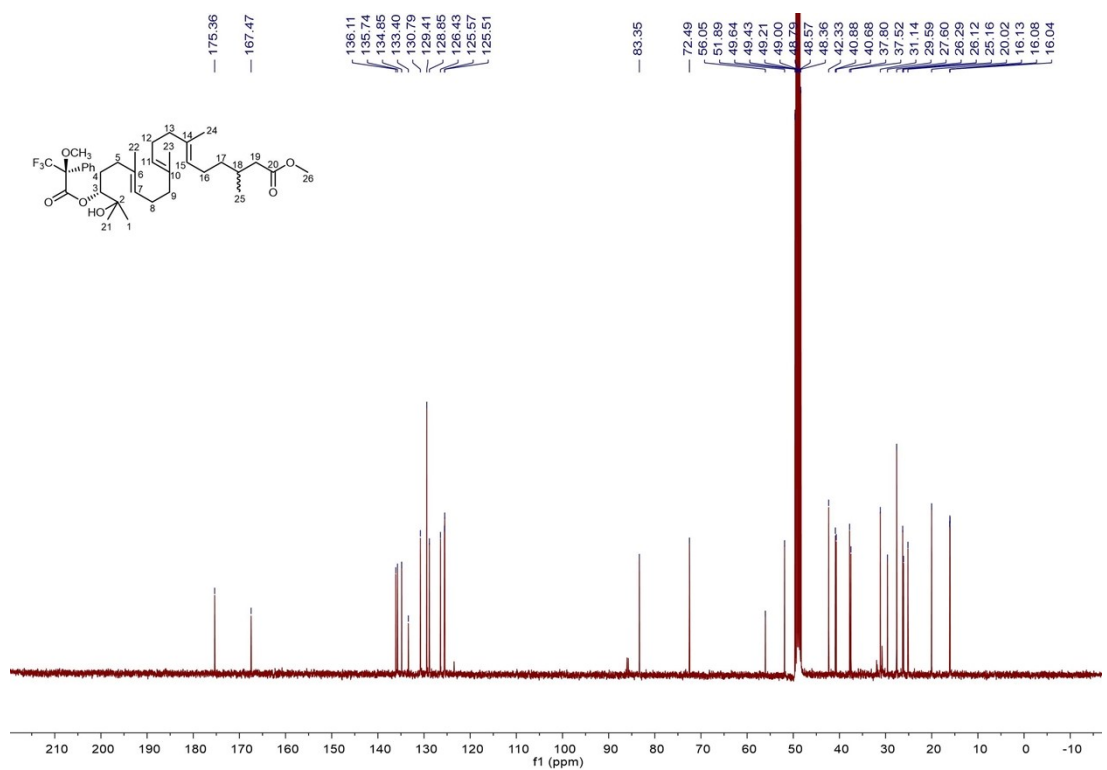

**Figure S70.**  $^{13}\text{C}$  NMR spectrum of **9b** in methanol- $d_4$  (100 MHz).

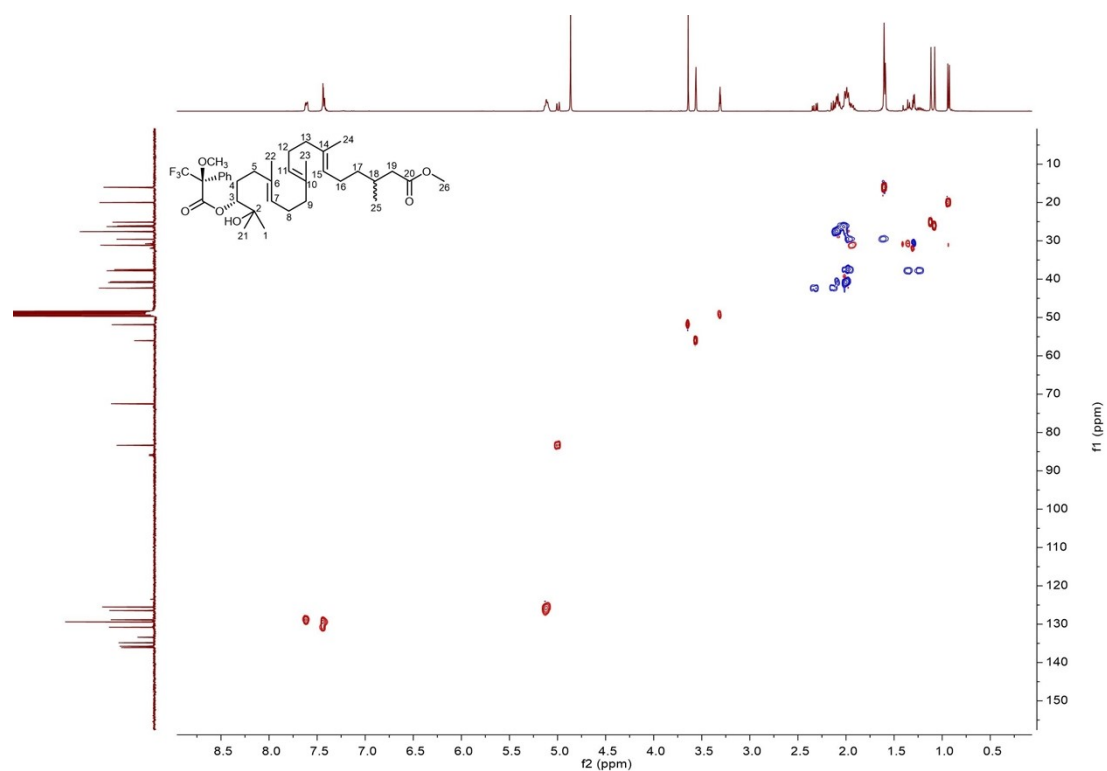

Figure S71. HSQC spectrum of **9b** in methanol- $d_4$ .

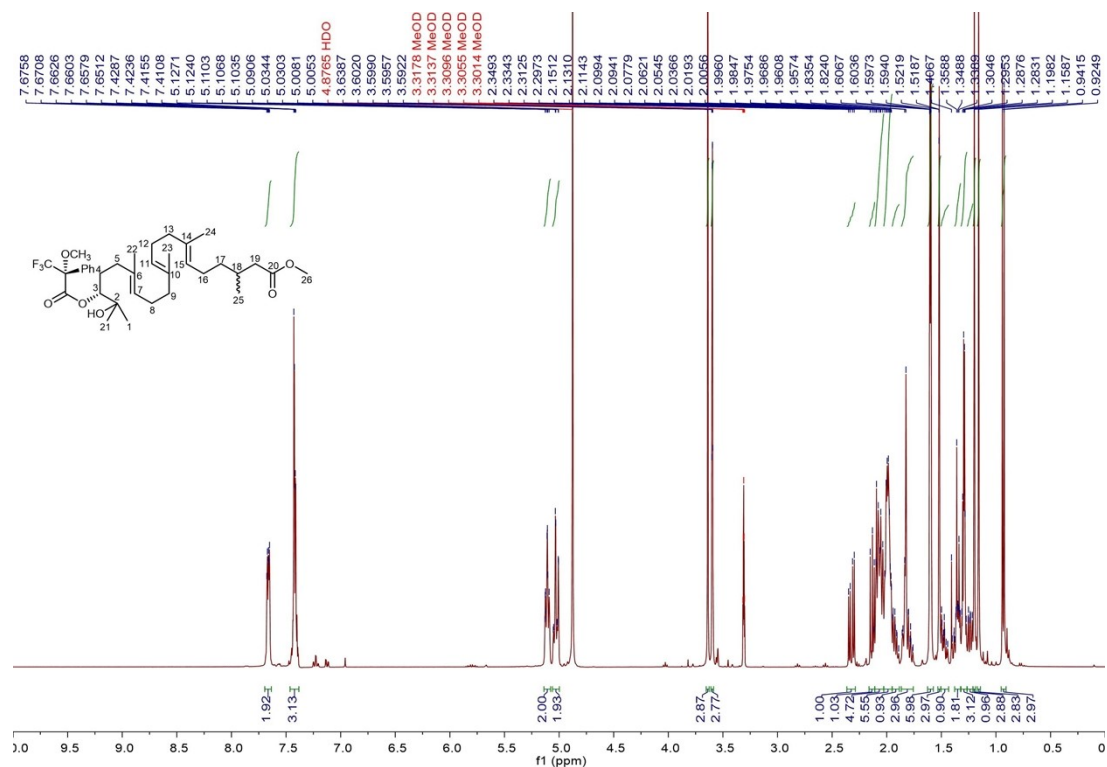

Figure S72.  $^1\text{H}$  NMR spectrum of **9c** in methanol- $d_4$  (400 MHz).

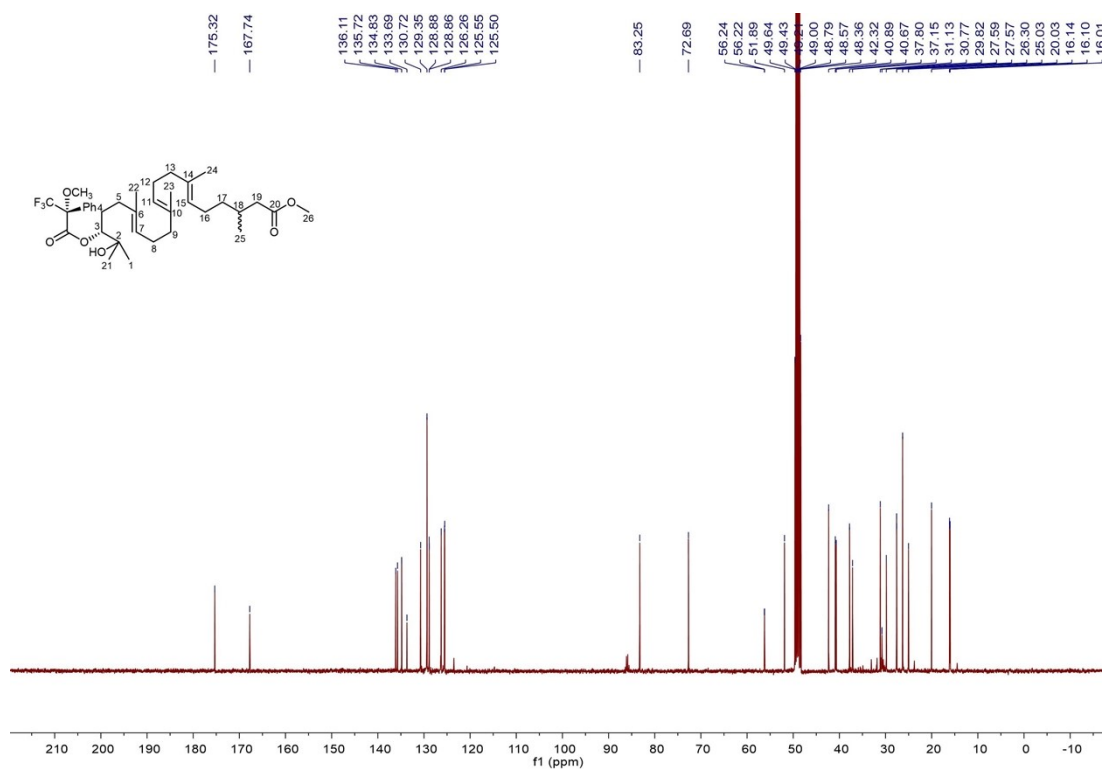

Figure S73.  $^{13}\text{C}$  NMR spectrum of **9c** in methanol- $d_4$  (100 MHz).

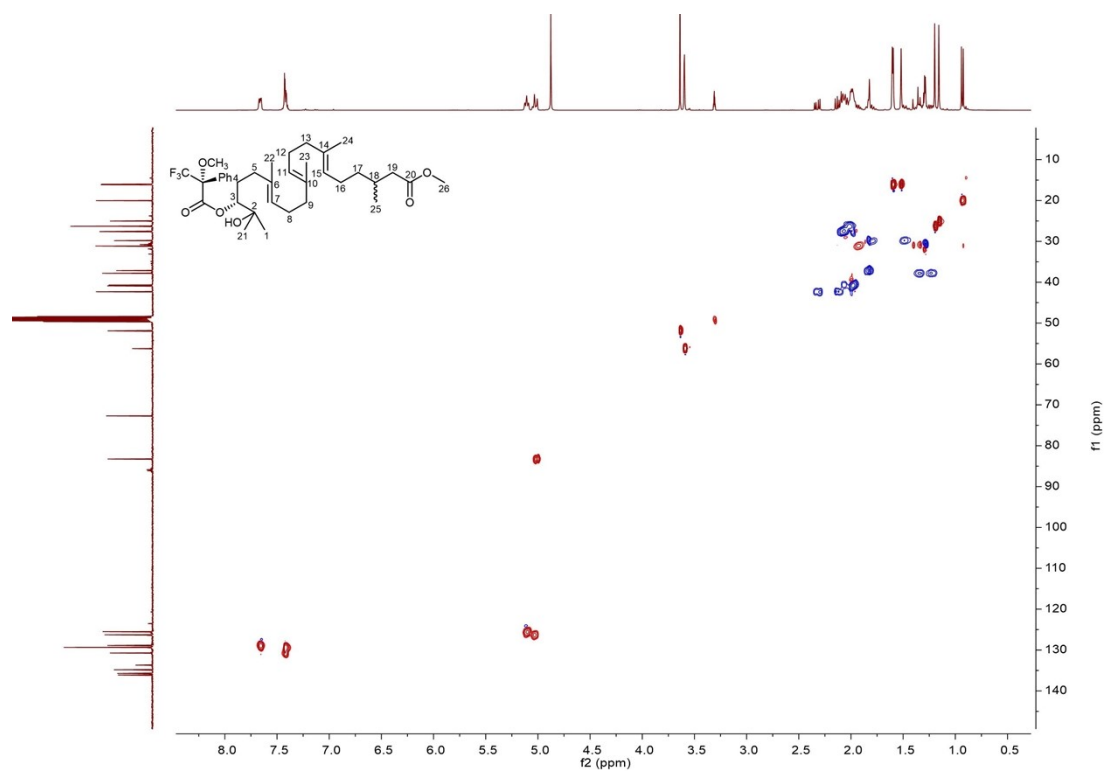

Figure S74. HSQC spectrum of **9c** in methanol- $d_4$ .



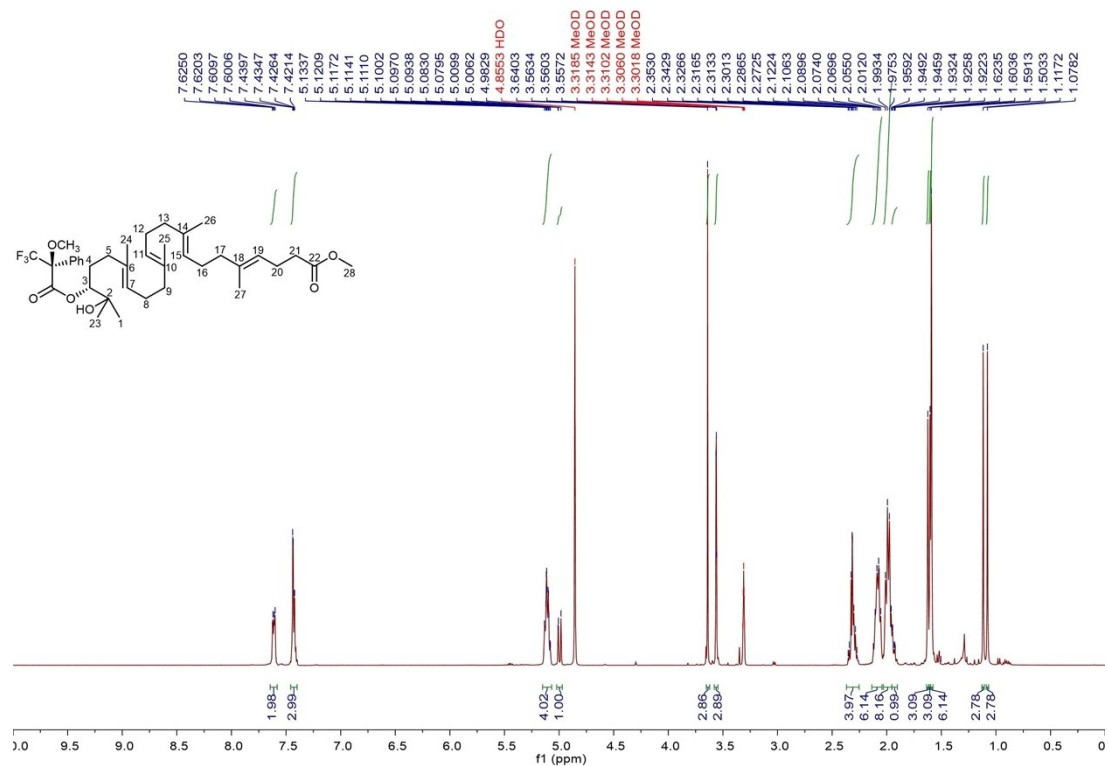

Figure S75. <sup>1</sup>H NMR spectrum of **10c** in methanol-*d*<sub>4</sub> (400 MHz).

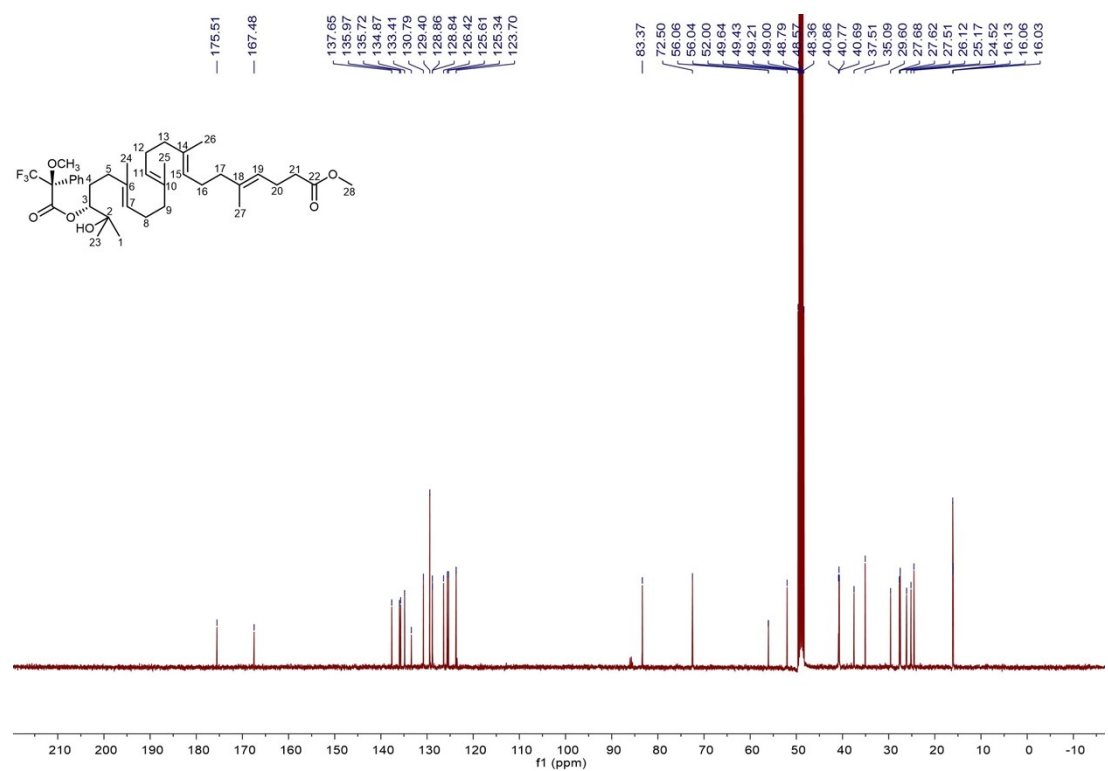

Figure S76. <sup>13</sup>C NMR spectrum of **10c** in methanol-*d*<sub>4</sub> (100 MHz).

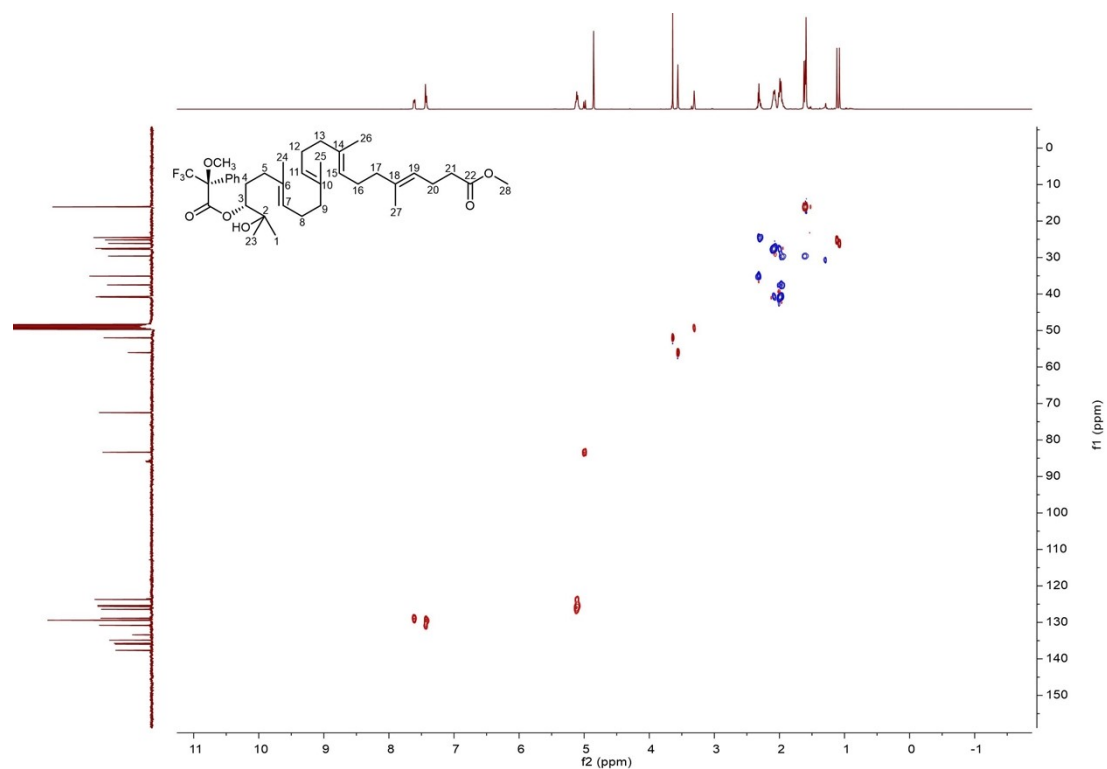

Figure S77. HSQC spectrum of **10c** in methanol- $d_4$ .

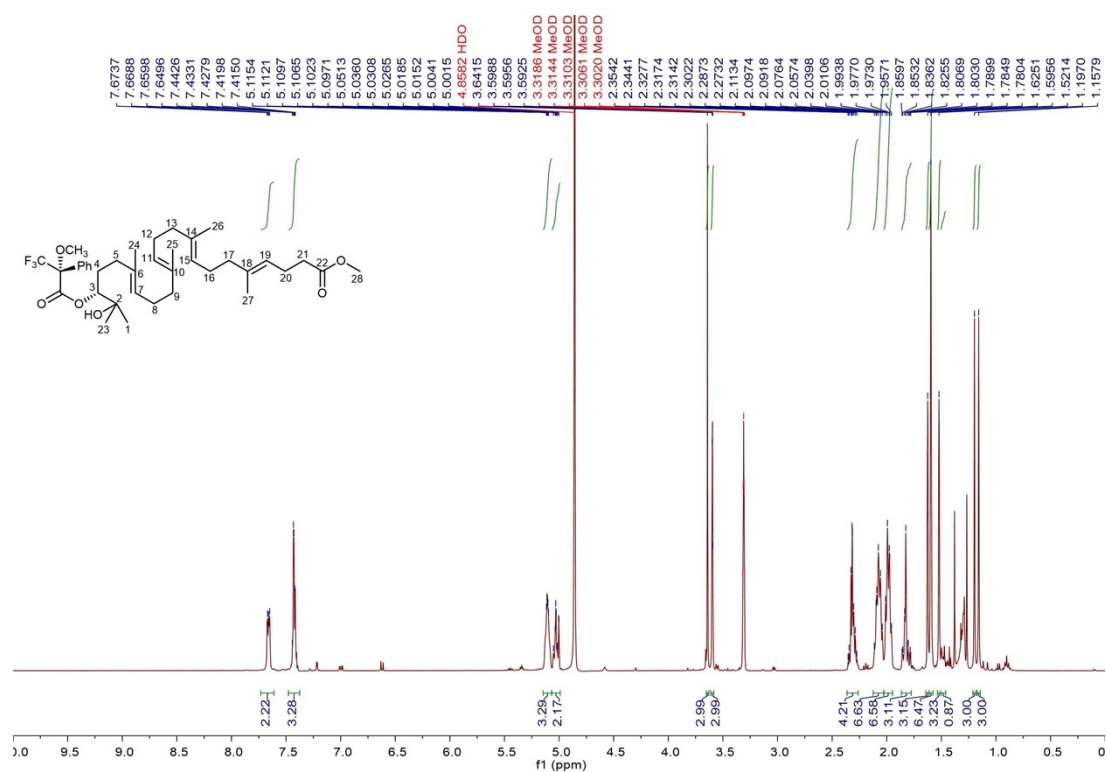

Figure S78.  $^1\text{H}$  NMR spectrum of **10d** in methanol- $d_4$  (400 MHz).

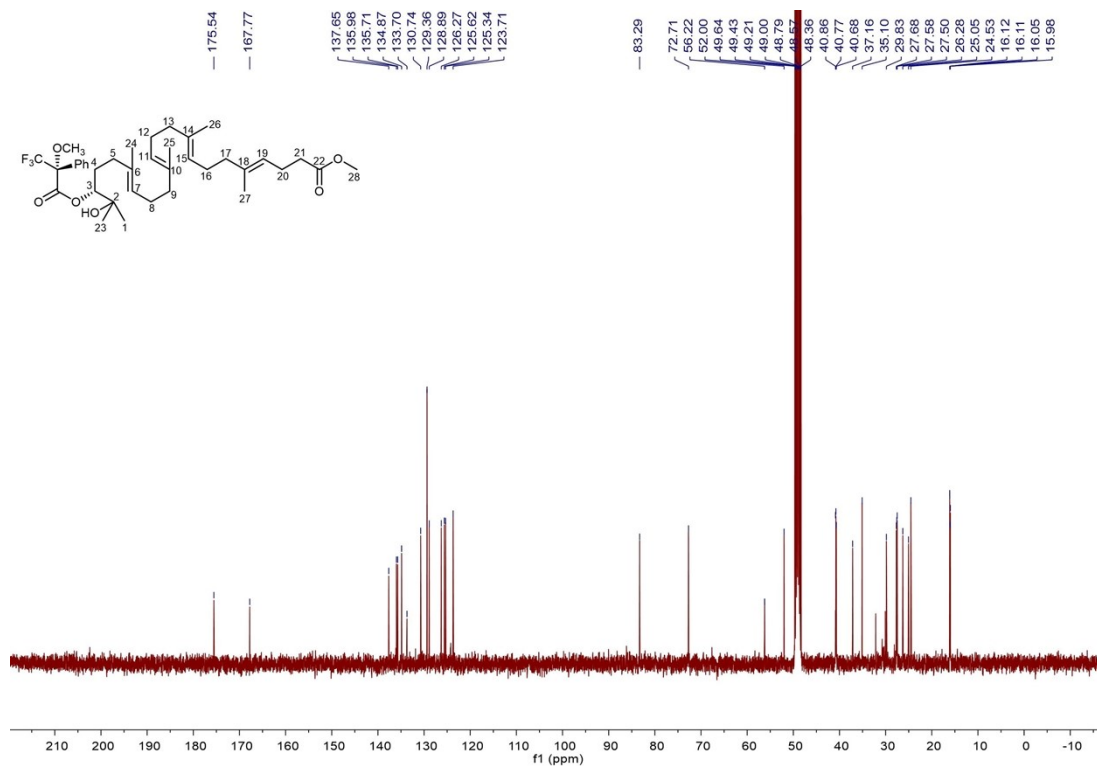

**Figure S79.** <sup>13</sup>C NMR spectrum of **10d** in methanol-*d*<sub>4</sub> (100 MHz).

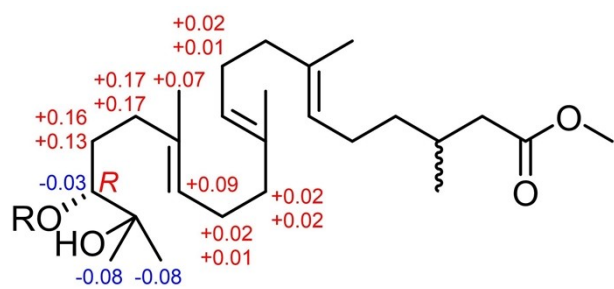

**9b** R = (*S*)-MTPA

**9c** R = (*R*)-MTPA

$\Delta\delta_{S-R}$  values ( $\Delta\delta = \delta_{9b} - \delta_{9c}$ )

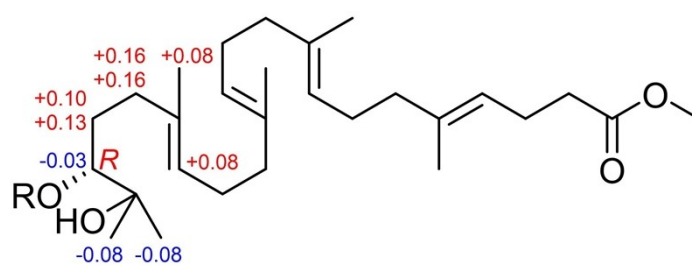

**10c** R = (*S*)-MTPA

**10d** R = (*R*)-MTPA

$\Delta\delta_{S-R}$  values ( $\Delta\delta = \delta_{10b} - \delta_{10c}$ )

**Figure S80.** Absolute stereochemical determination at C3 of **9** and **10** using the modified Mosher method.

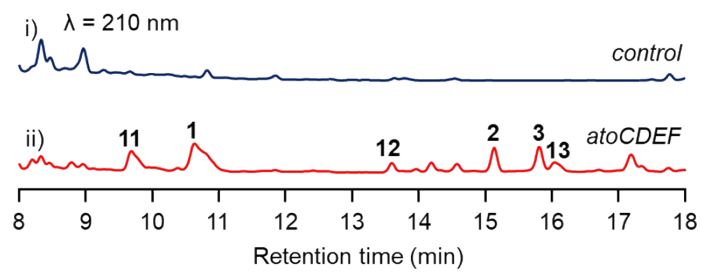

**Figure S81.** HPLC analysis of metabolites from *S. lividans* DLW1012 harboring the four genes *atoCDEF*. *S. lividans* SBT18 with empty pSET152 was used as a control.

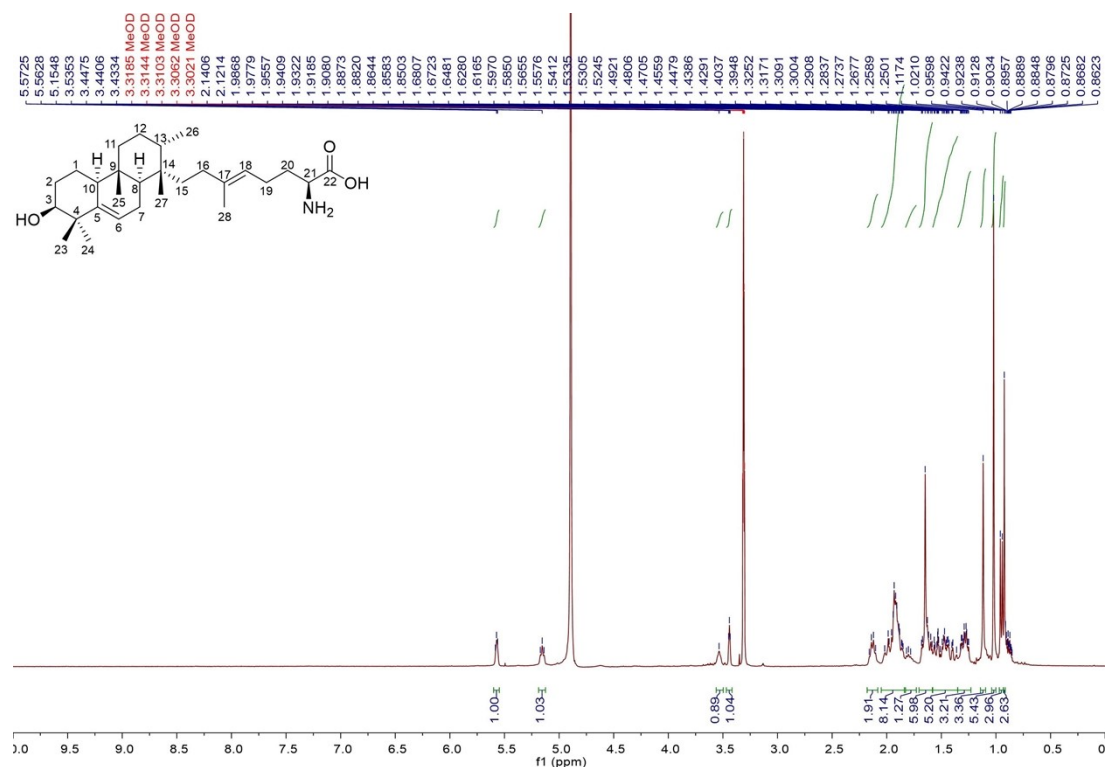

Figure S82. <sup>1</sup>H NMR spectrum of atolypene E (11) in methanol-*d*<sub>4</sub> (400 MHz).

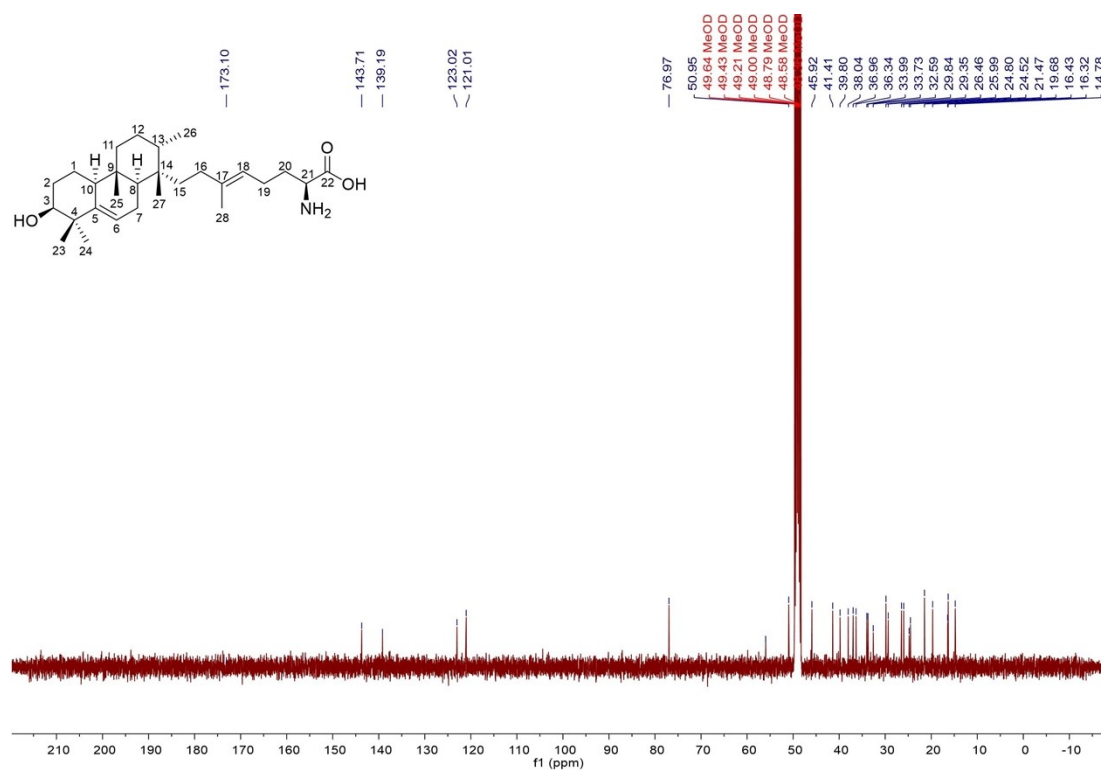

Figure S83. <sup>13</sup>C NMR spectrum of atolypene E (11) in methanol-*d*<sub>4</sub> (100 MHz).

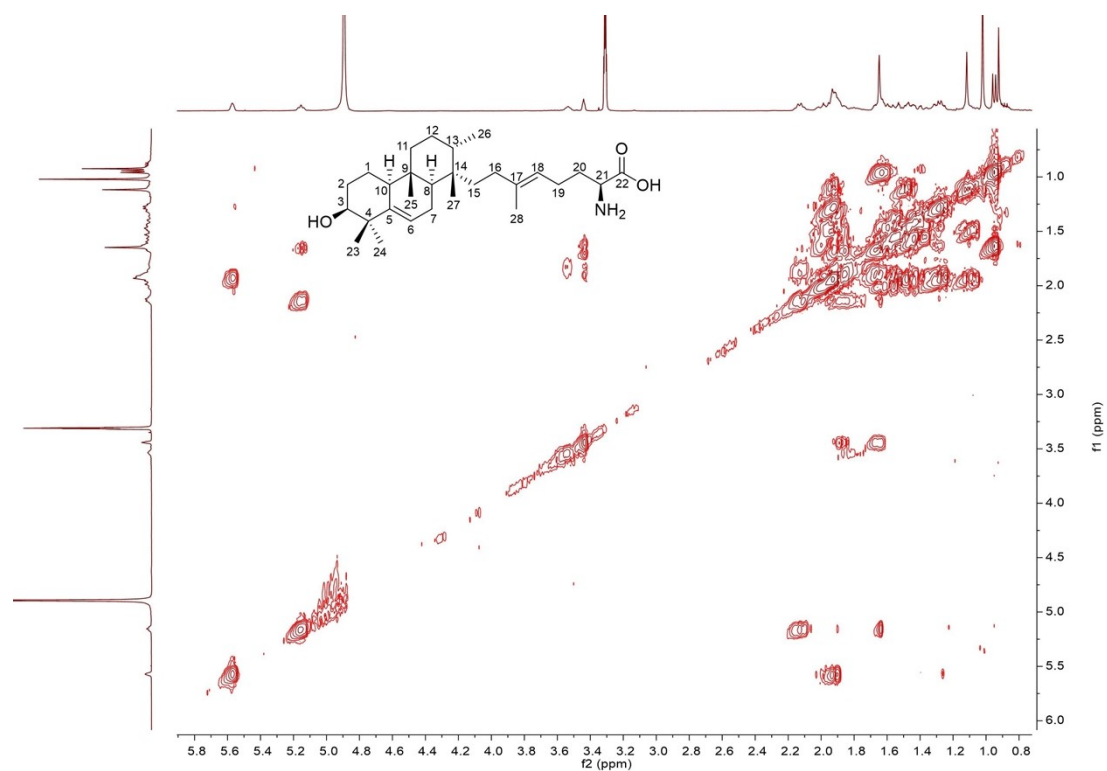

Figure S84.  $^1\text{H}$ - $^1\text{H}$  COSY spectrum of atolypene E (**11**) in methanol- $d_4$ .

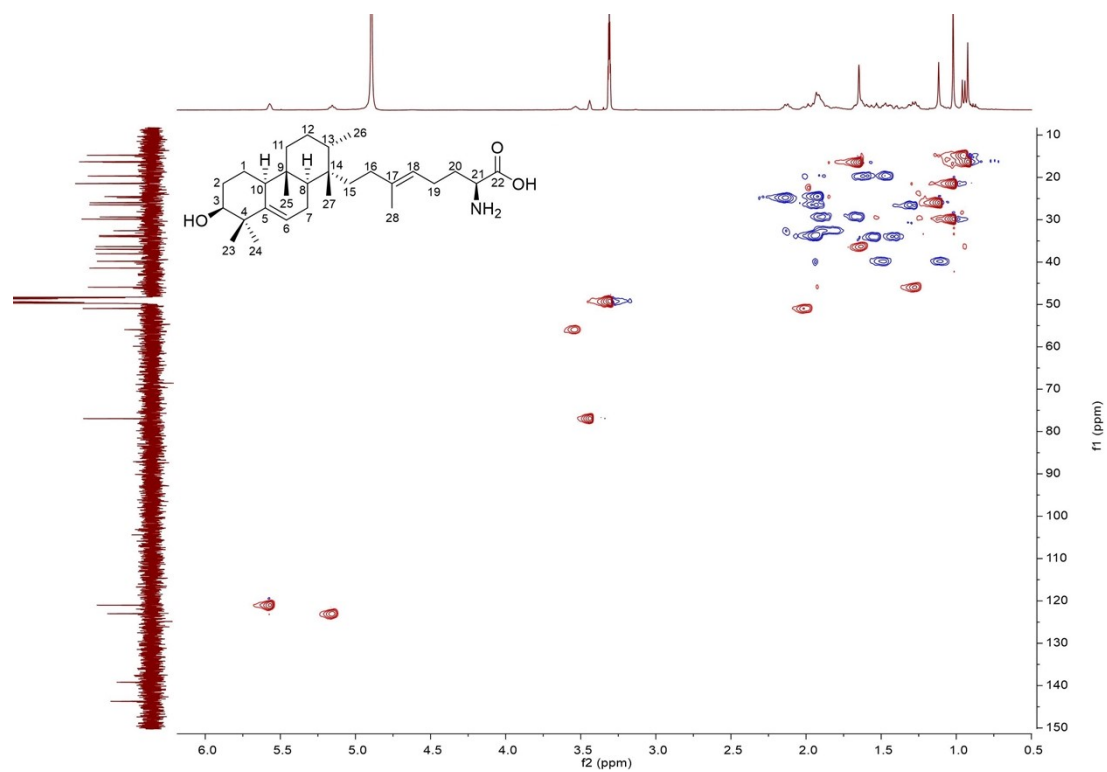

Figure S85. HSQC spectrum of atolypene E (**11**) in methanol- $d_4$ .

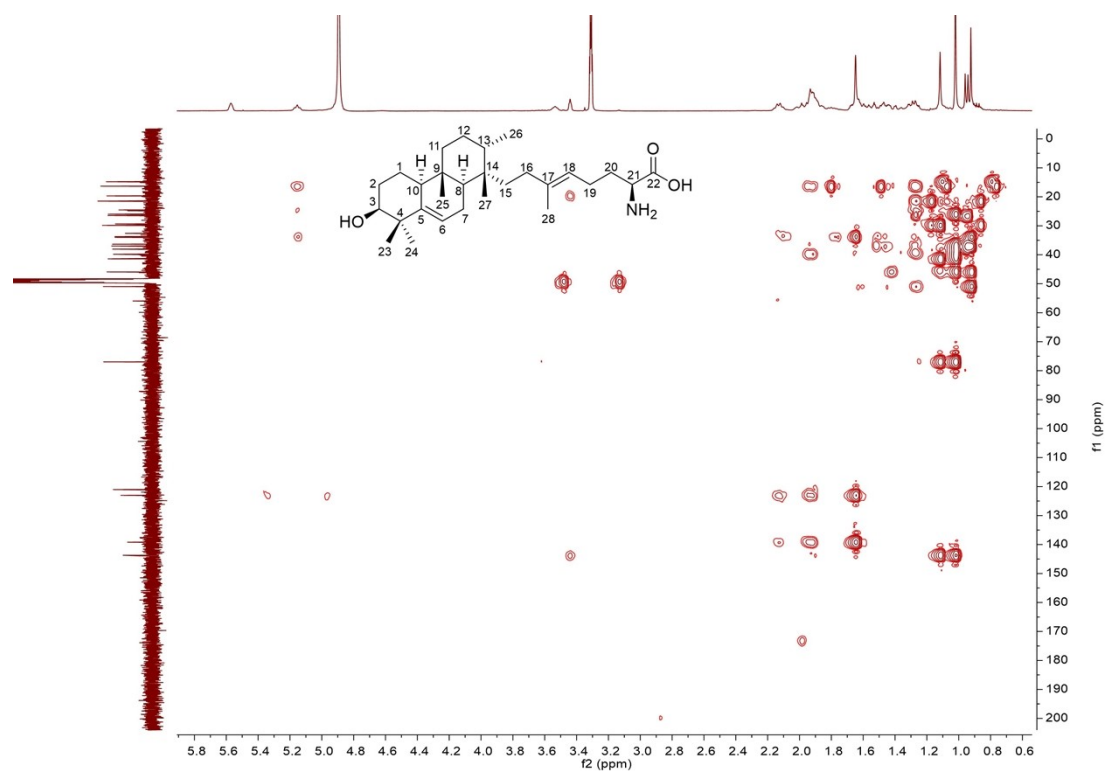

Figure S86. HMBC spectrum of atolypene E (**11**) in methanol- $d_4$ .

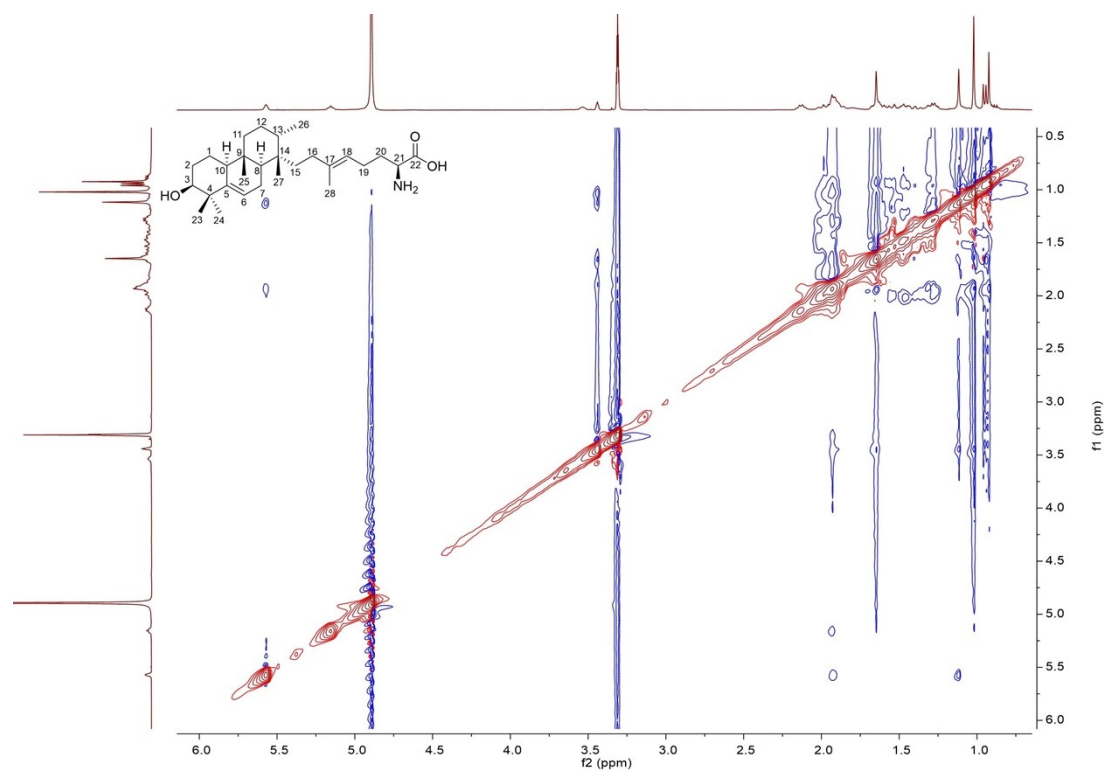

Figure S87. ROESY spectrum of atolypene E (**11**) in methanol- $d_4$ .



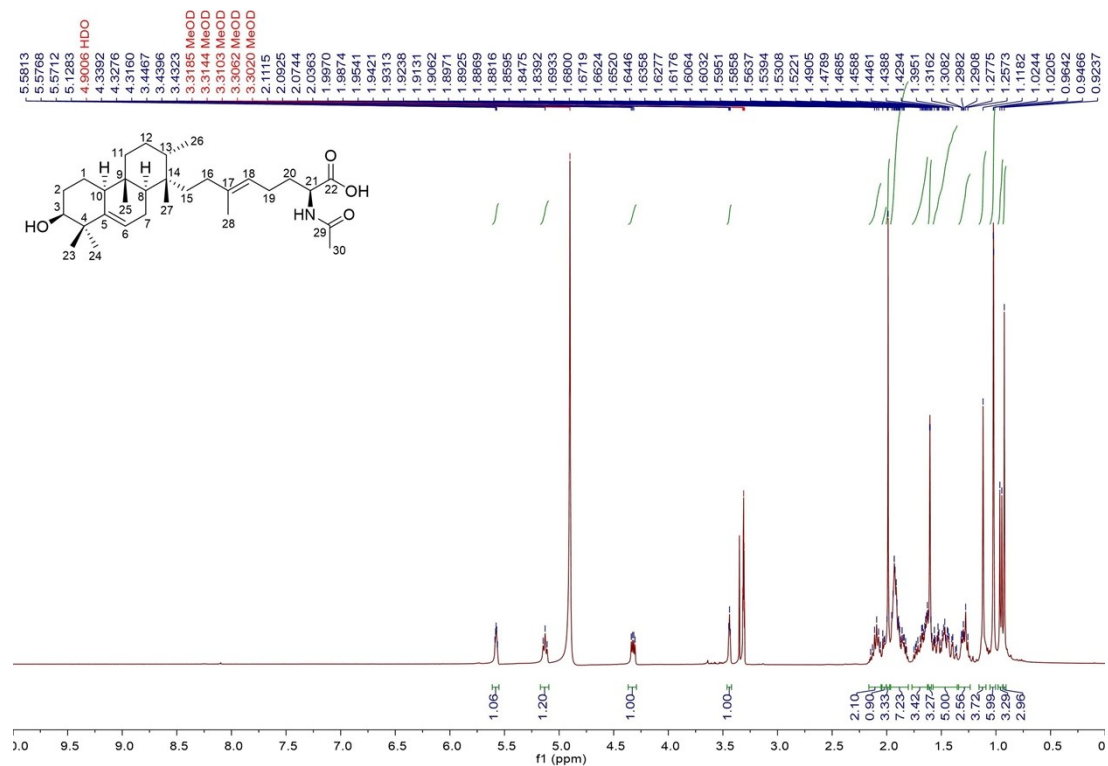

**Figure S88.** <sup>1</sup>H NMR spectrum of atolypene E (**11**) in methanol-*d*<sub>4</sub> (400 MHz).

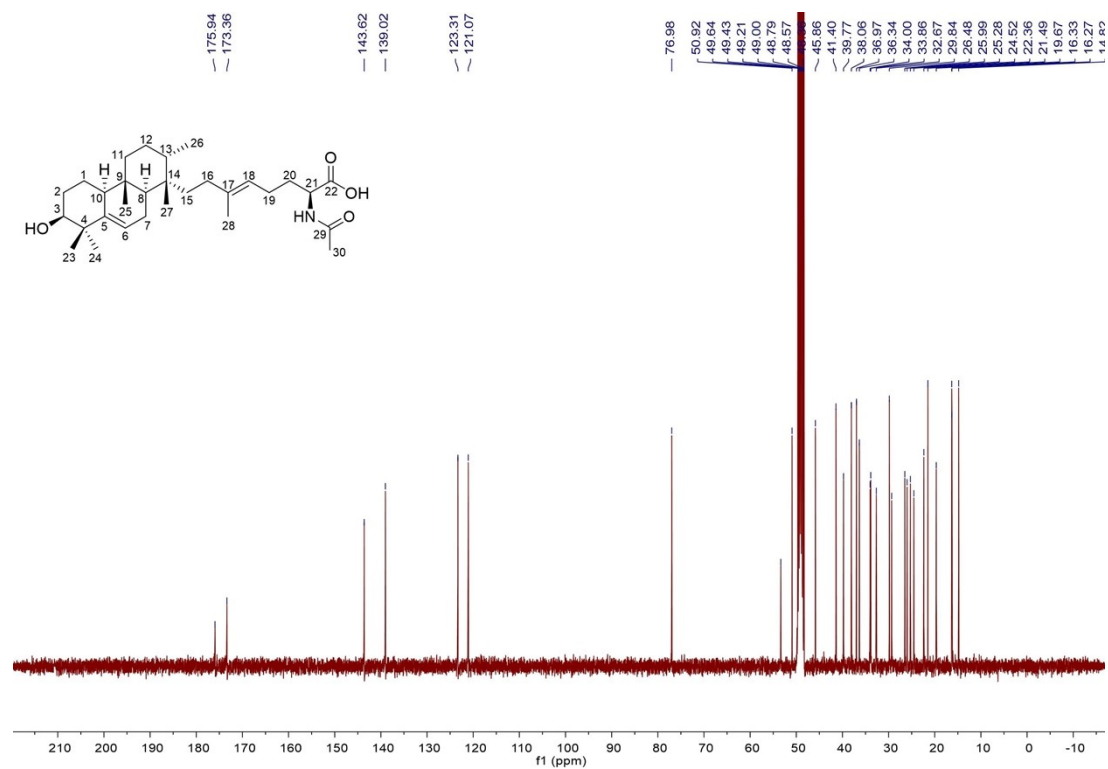

**Figure S89.** <sup>13</sup>C NMR spectrum of atolypene F (**12**) in methanol-*d*<sub>4</sub> (100 MHz).

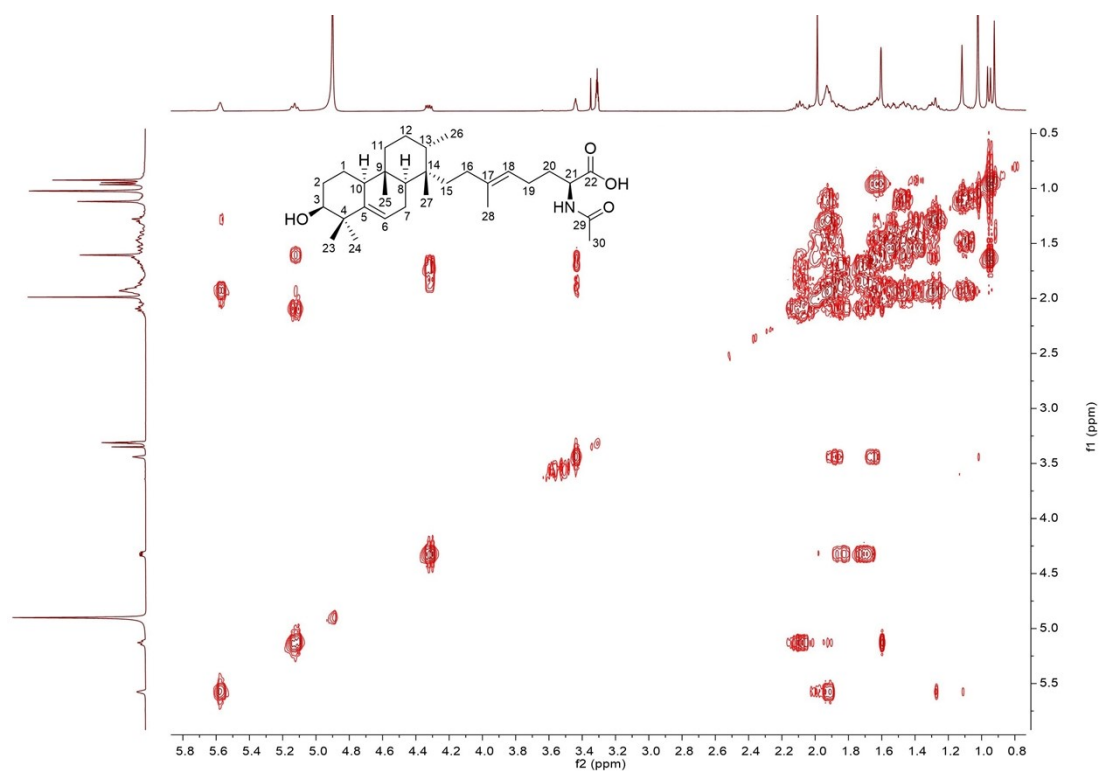

Figure S90.  $^1\text{H}$ - $^1\text{H}$  COSY spectrum of atolypene F (**12**) in methanol- $d_4$ .

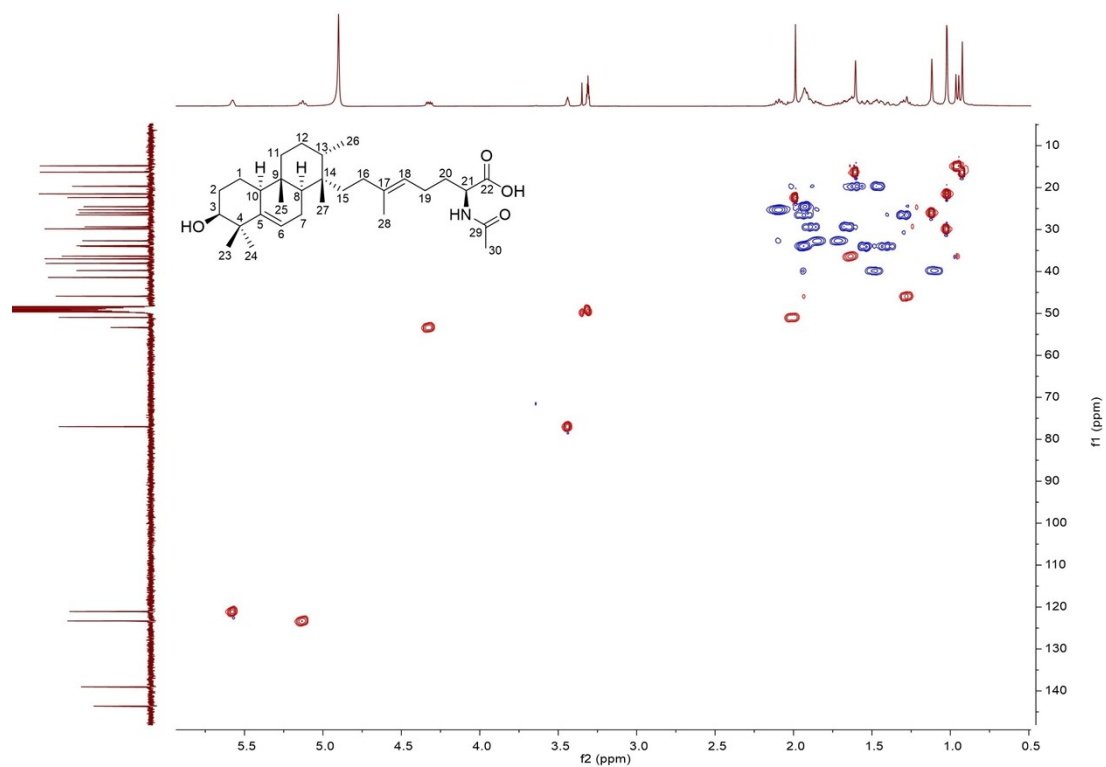

Figure S91. HSQC spectrum of atolypene F (**12**) in methanol- $d_4$ .

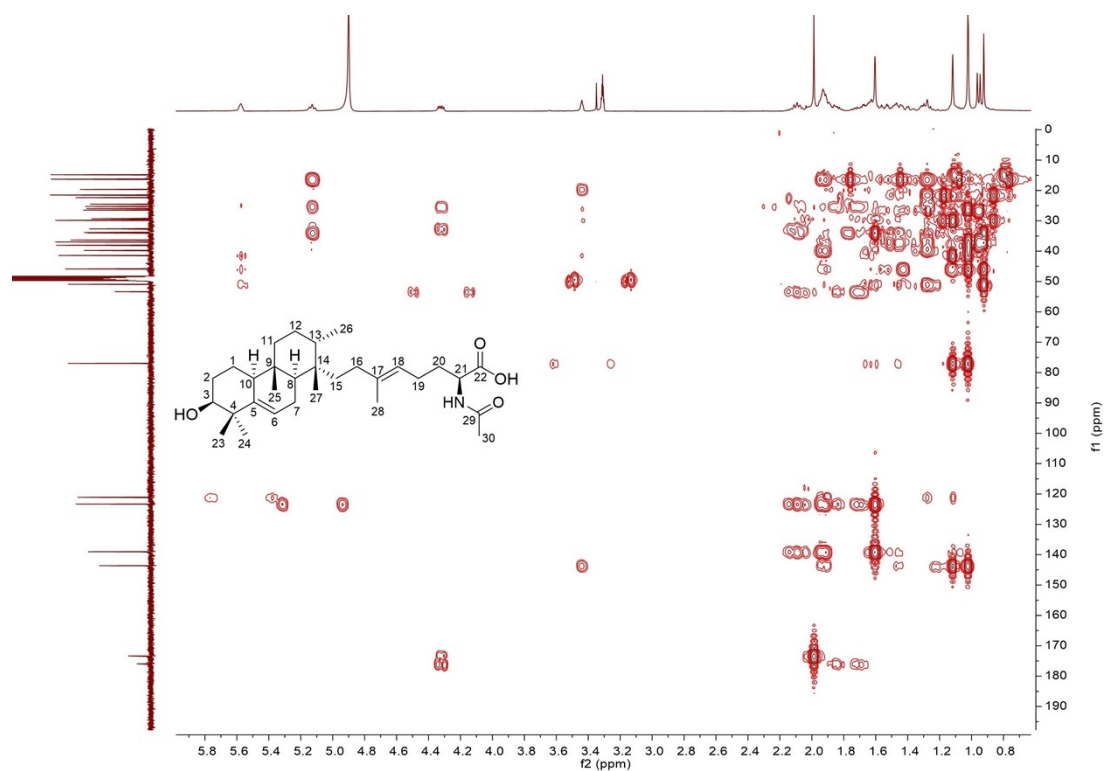

Figure S92. HMBC spectrum of atolypene F (**12**) in methanol- $d_4$ .

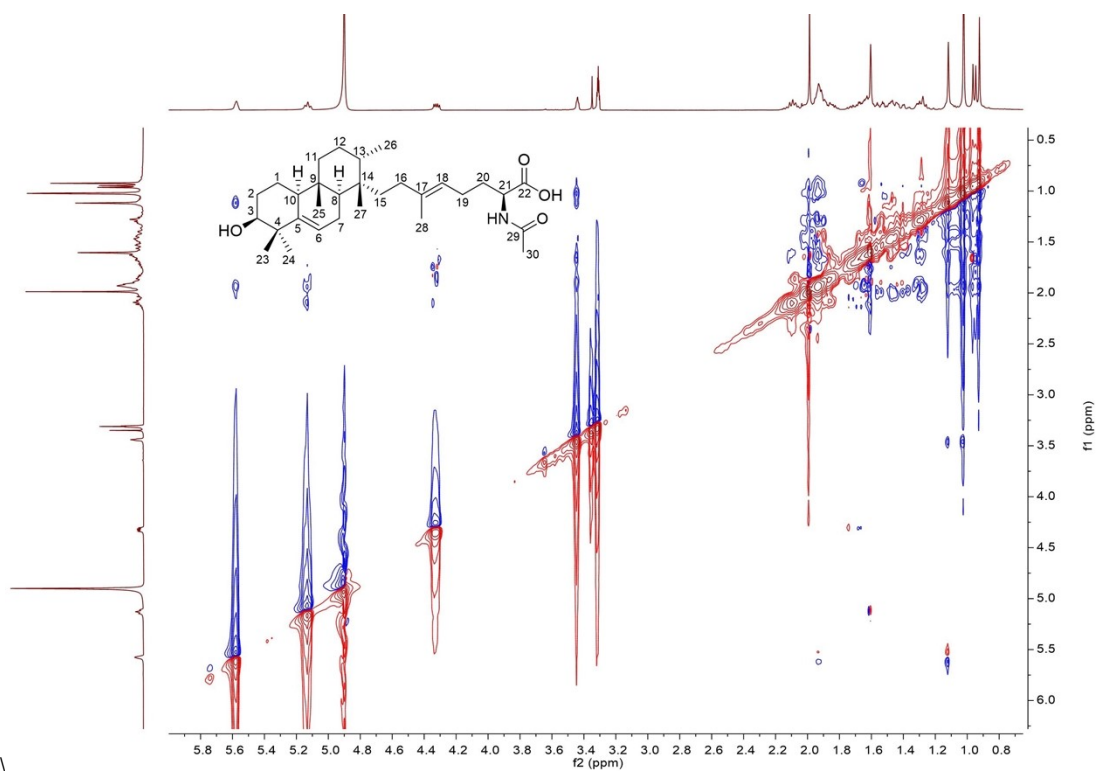

Figure S93. ROESY spectrum of atolypene F (**12**) in methanol- $d_4$ .

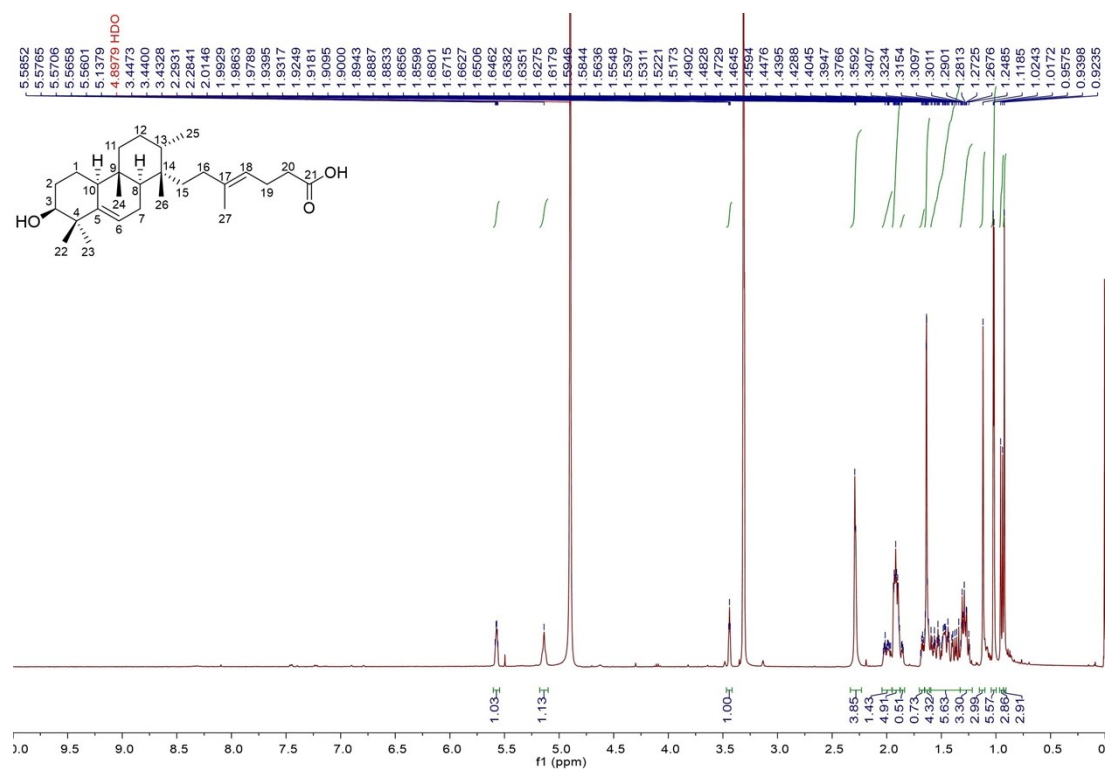

Figure S94. <sup>1</sup>H NMR spectrum of atolypene G (13) in methanol-d<sub>4</sub> (400 MHz).

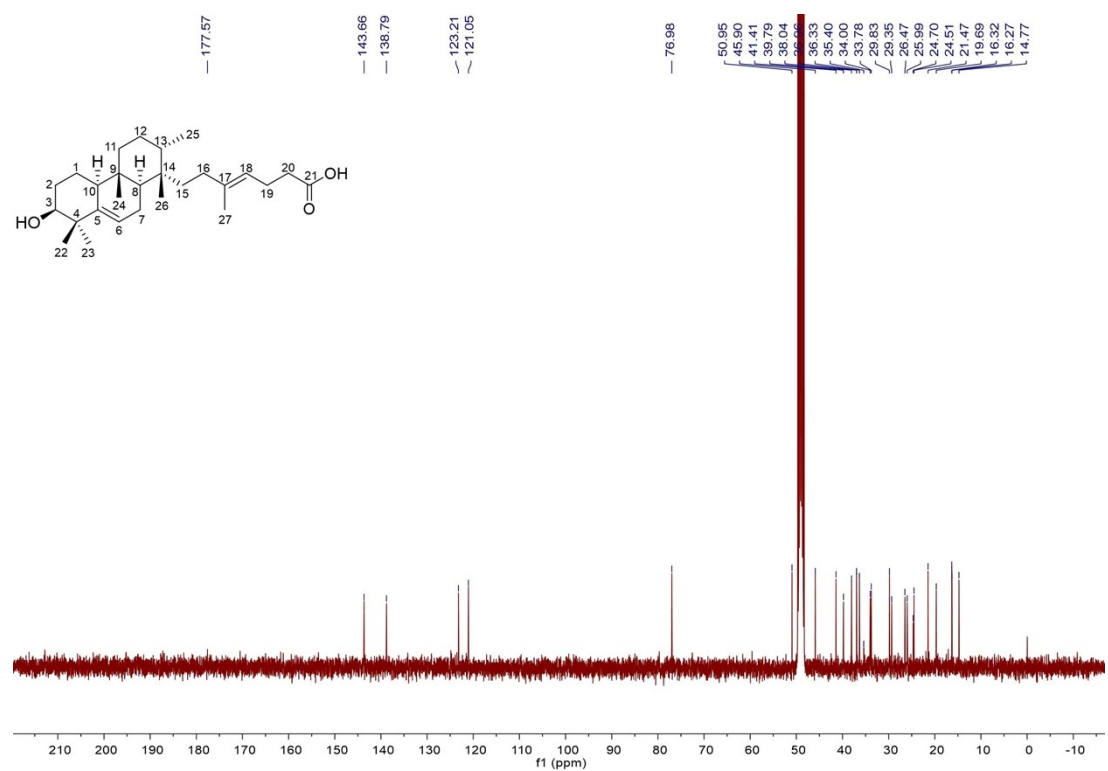

Figure S95. <sup>13</sup>C NMR spectrum of atolypene G (13) in methanol-d<sub>4</sub> (100 MHz).

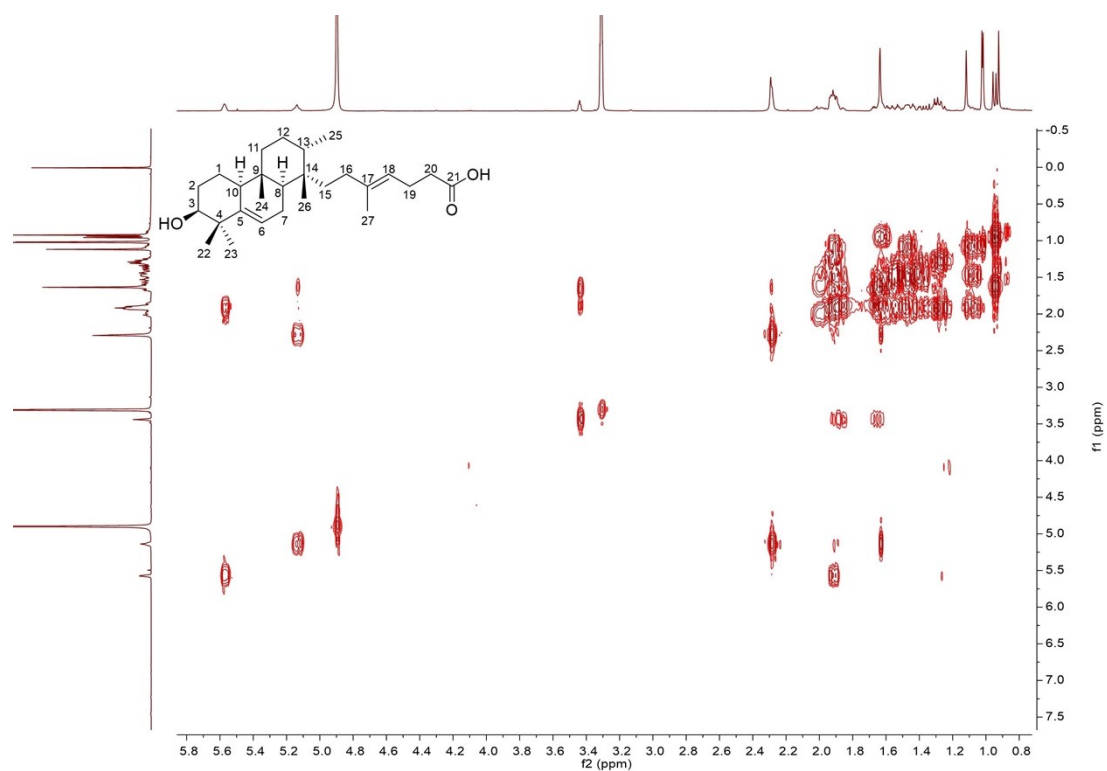

Figure S96.  $^1\text{H}$ - $^1\text{H}$  COSY spectrum of atolypene G (**13**) in methanol- $d_4$ .

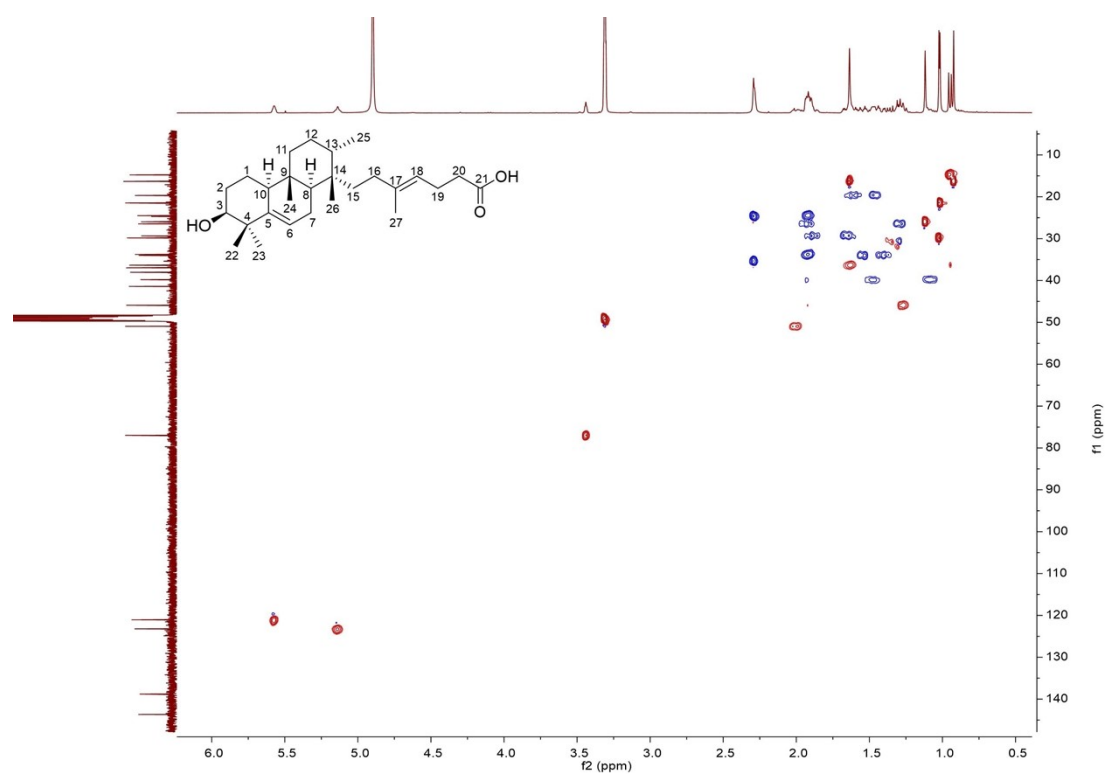

Figure S97. HSQC spectrum of atolypene G (**13**) in methanol- $d_4$ .

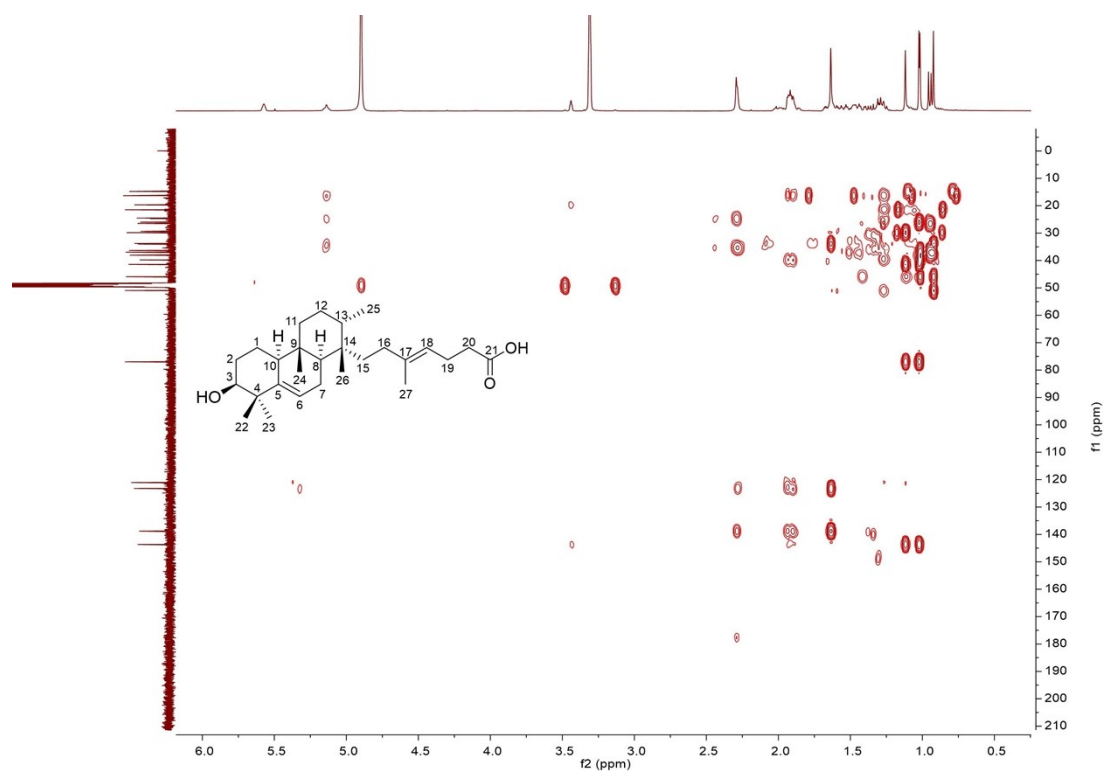

Figure S98. HMBC spectrum of atolypene G (**13**) in methanol- $d_4$ .

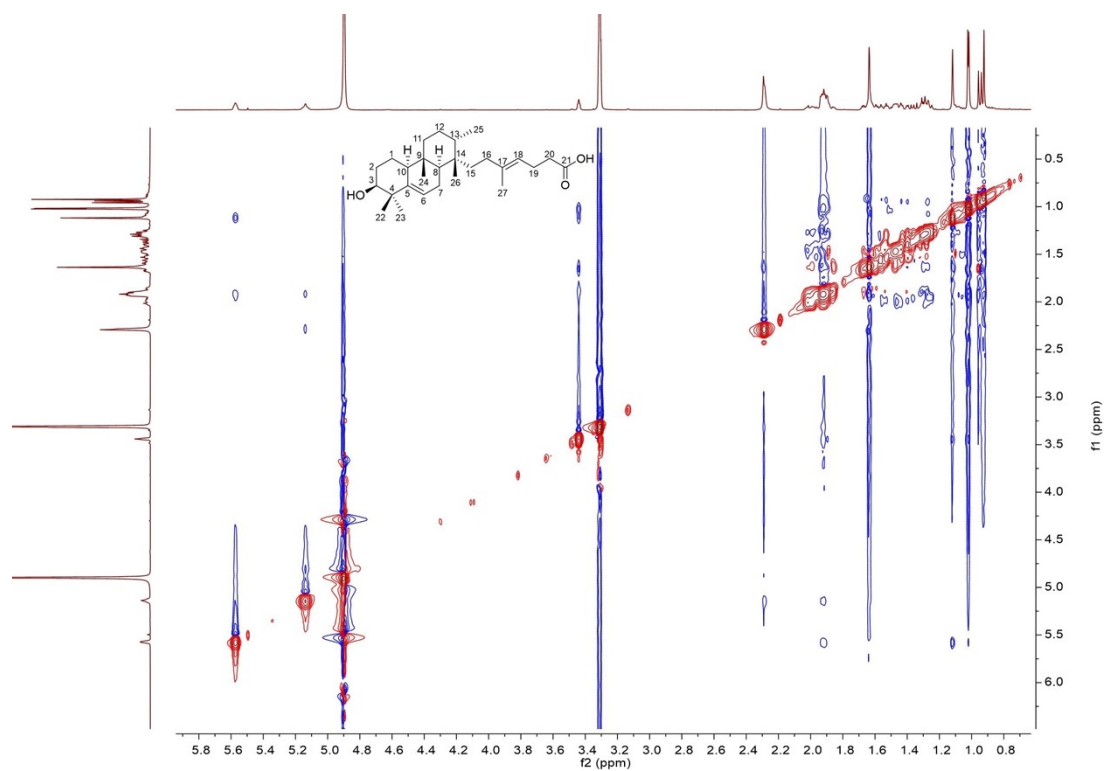

Figure S99. ROESY spectrum of atolypene G (**13**) in methanol- $d_4$ .

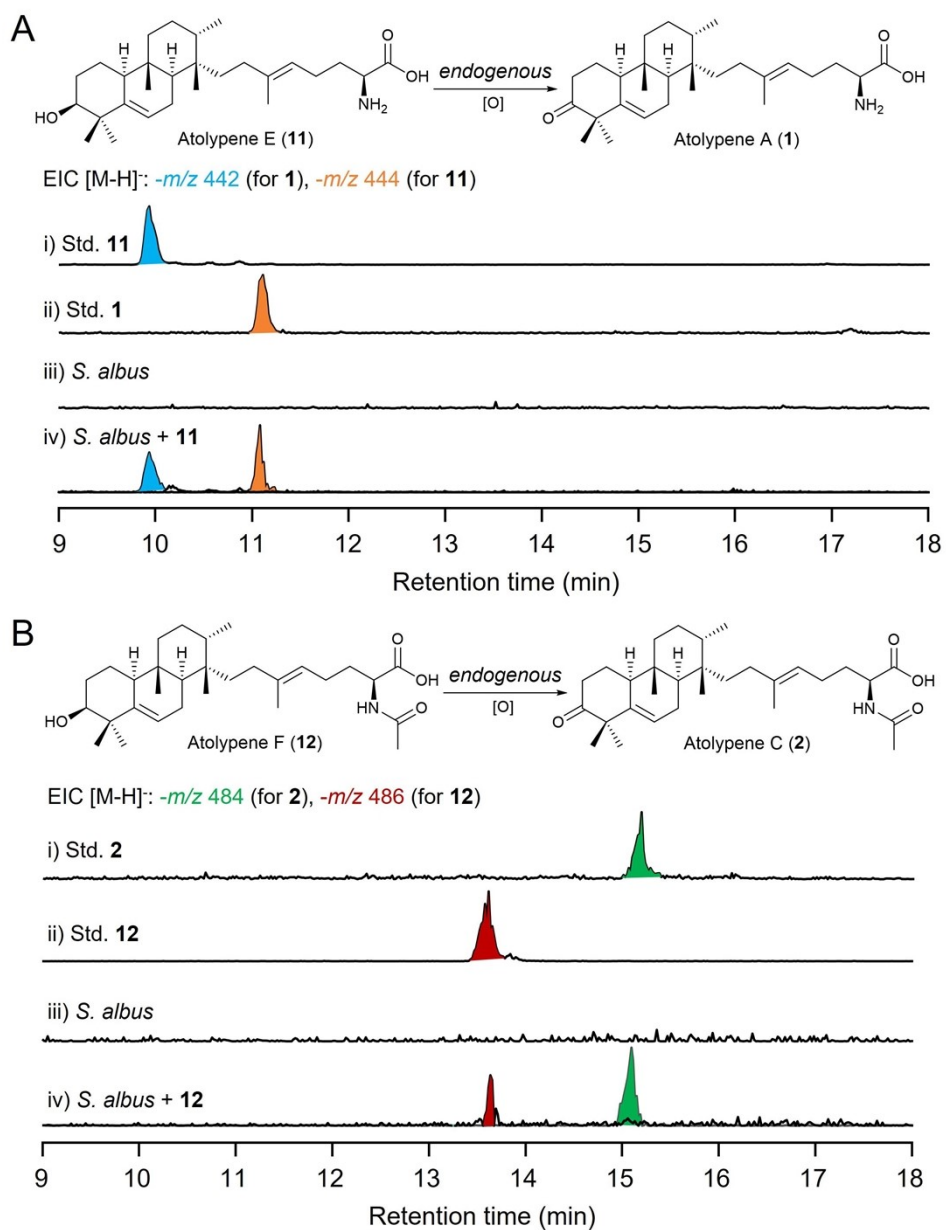

**Figure S100.** EIC analysis of wild-type *S. albus* that were supplemented with 11 and 12, respectively.

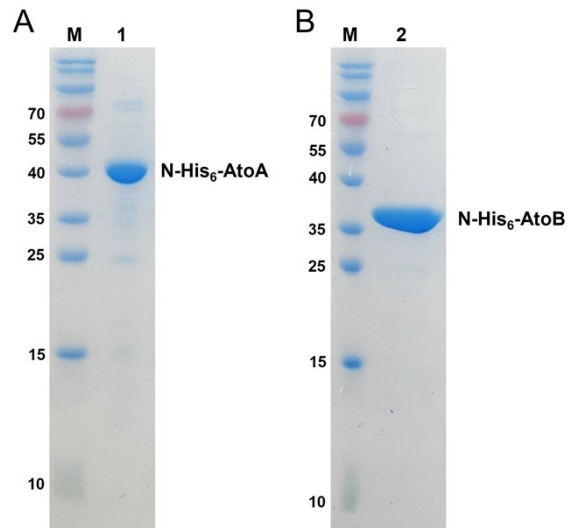

**Figure S101.** Protein purification of AtoA and AtoB. A) SDS-PAGE gel of purified AtoA. B) SDS-PAGE gel of purified AtoB. M, Prestained Protein Marker (Vazyme); lane 1, purified N-His<sub>6</sub>-tagged AtoA (413 amino acids, ~45.0 KDa); lane 2, purified N-His<sub>6</sub>-tagged AtoB (346 amino acids, ~36.8 KDa).



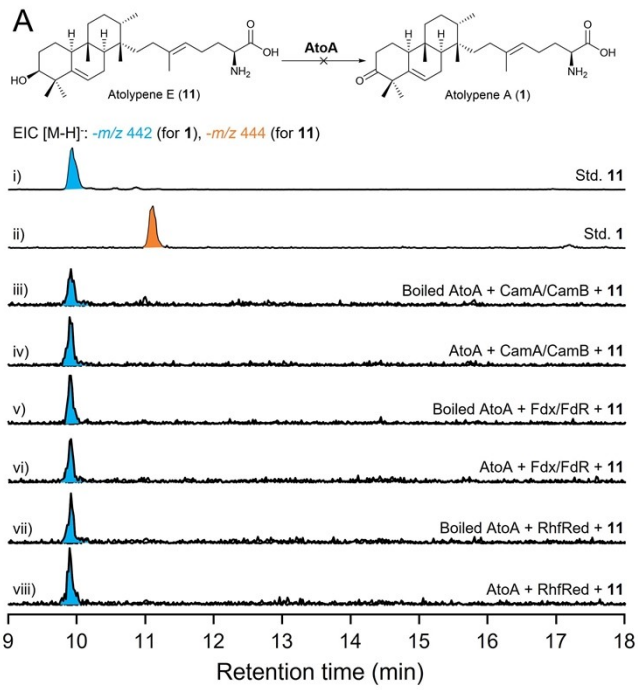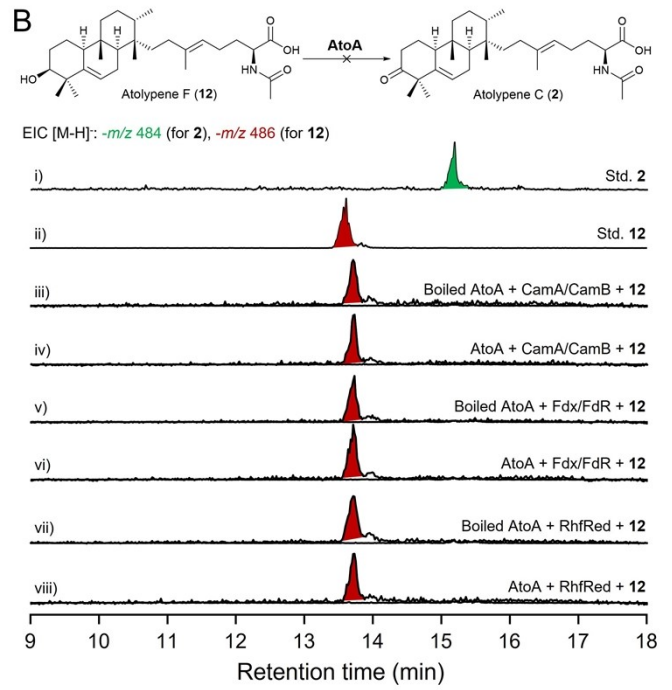

**Figure S102.** LC-MS analysis of the *in vitro* reactions of AtoA with **11** and **12**, respectively.





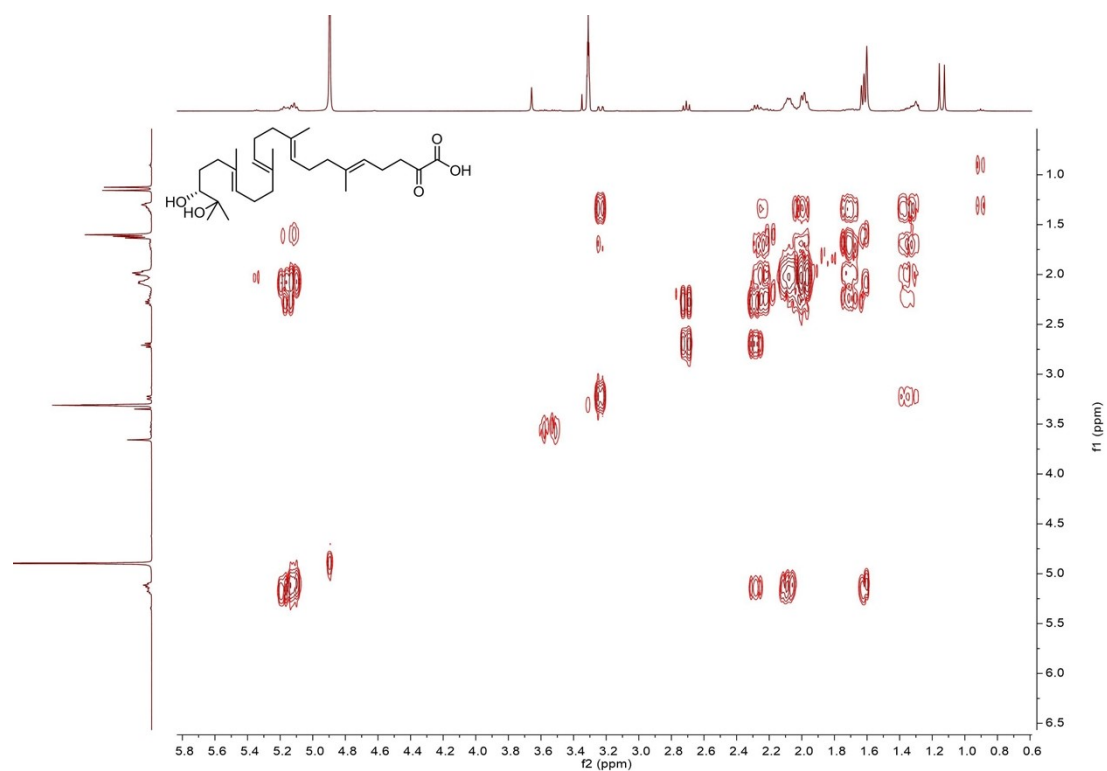

Figure S106.  $^1\text{H}$ - $^1\text{H}$  COSY spectrum of **14** in methanol- $d_4$ .

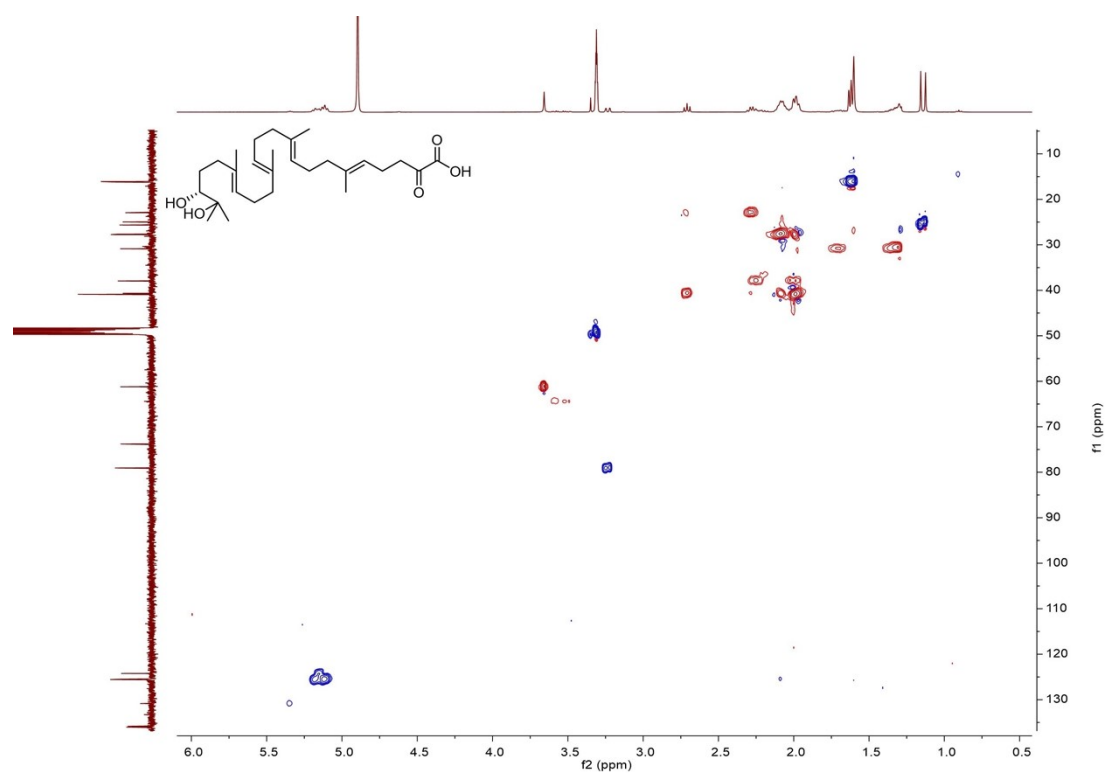

Figure S107. HSQC spectrum of **14** in methanol- $d_4$ .

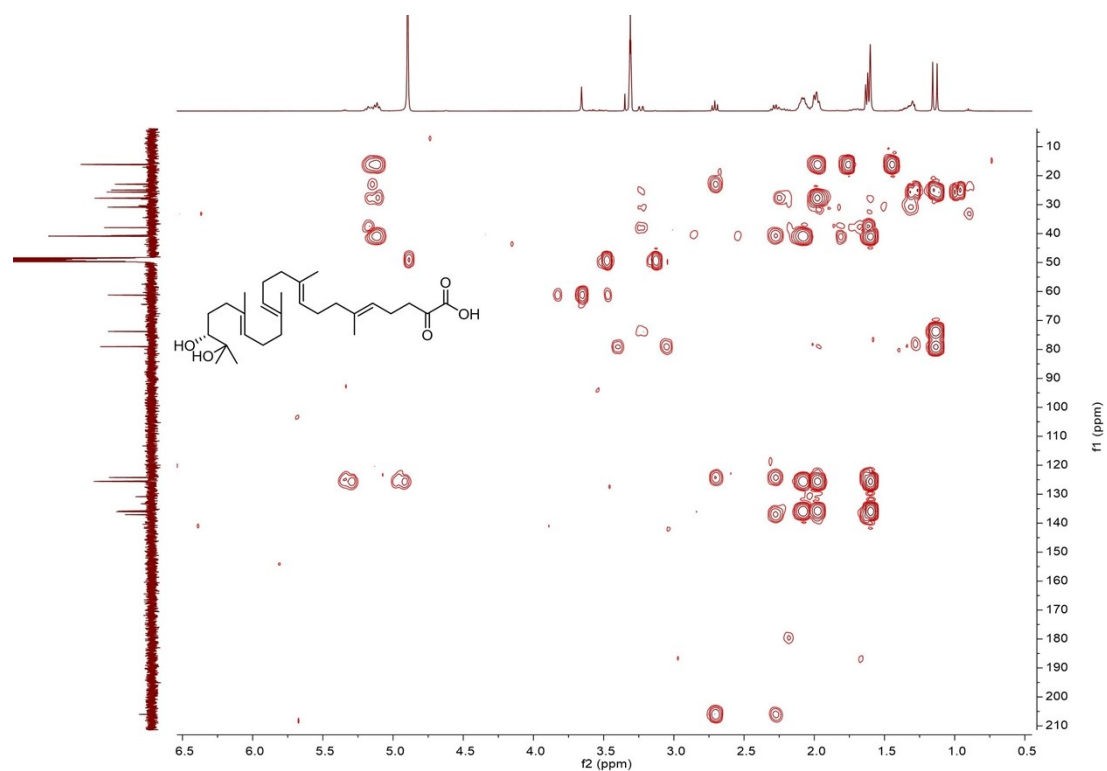

Figure S108. HMBC spectrum of **14** in methanol- $d_4$ .

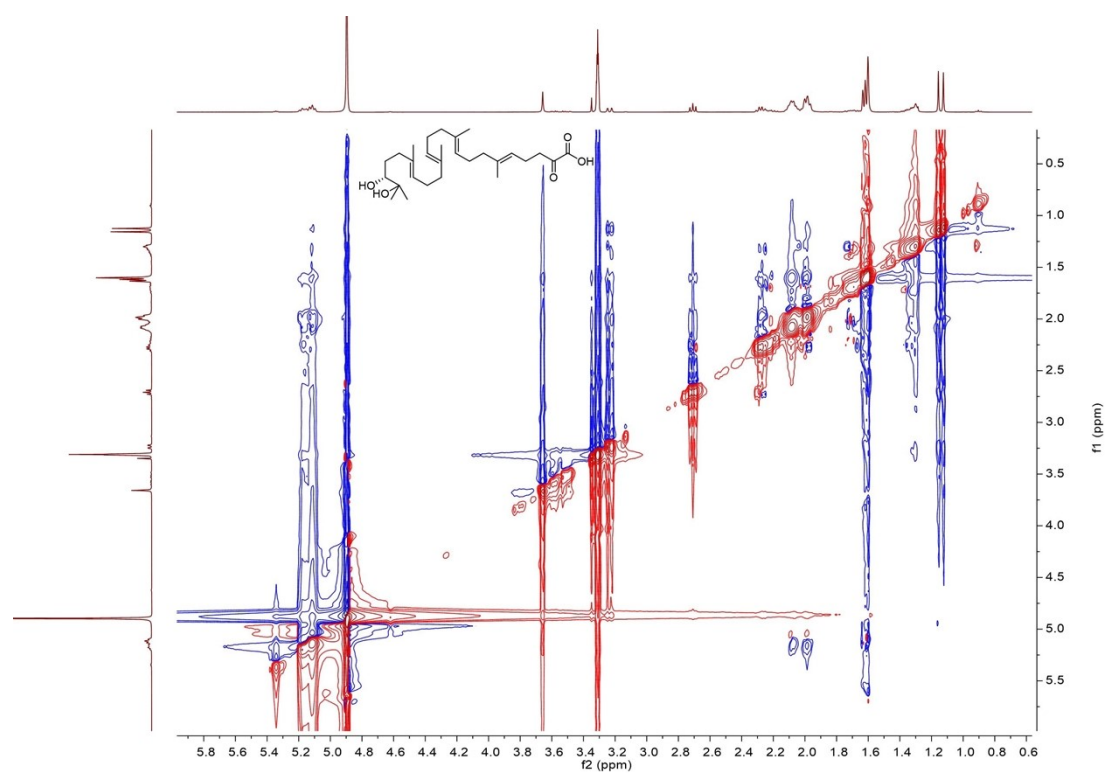

Figure S109. ROESY spectrum of **14** in methanol- $d_4$ .

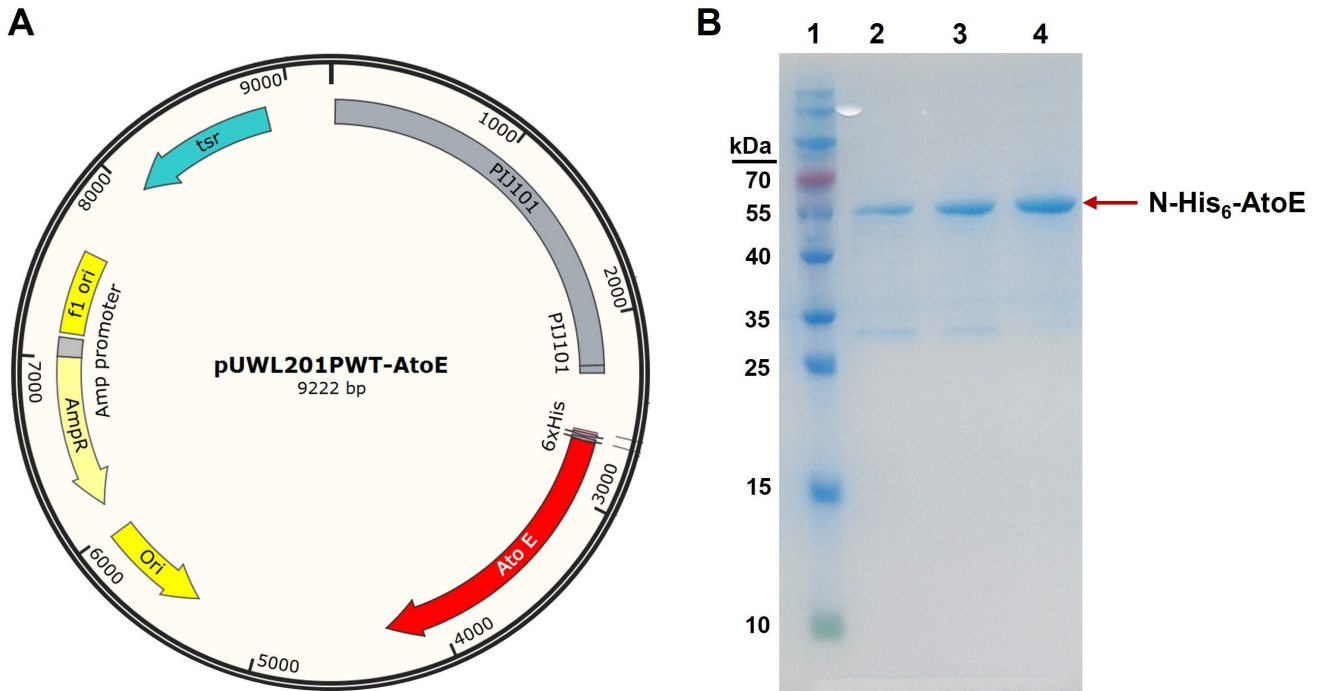

**Figure S110.** Plasmid construction and protein purification of AtoE. A) Plasmid map, gene *atoE* with His<sub>6</sub>-tag were inserted into the *NdeI* and *EcoRI* restriction sites within the pUWL201PWT vector to construct the pUWL201PWT-AtoE. B) SDS-PAGE gel of purified AtoE. Lane 1, Prestained Protein Marker (Vazyme); lane 2-4, purified N-His<sub>6</sub>-tagged AtoE (553 amino acids, ~59.3 KDa).

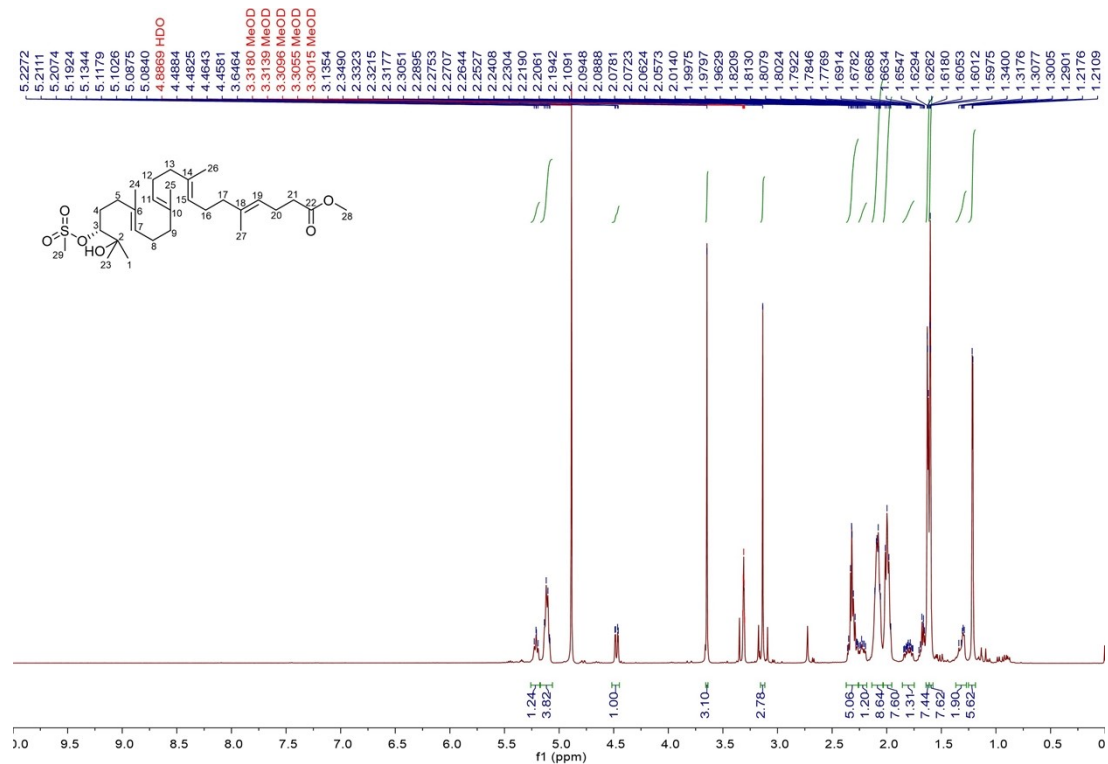

Figure S111. <sup>1</sup>H NMR spectrum of **10e** in methanol-*d*<sub>4</sub> (400 MHz).

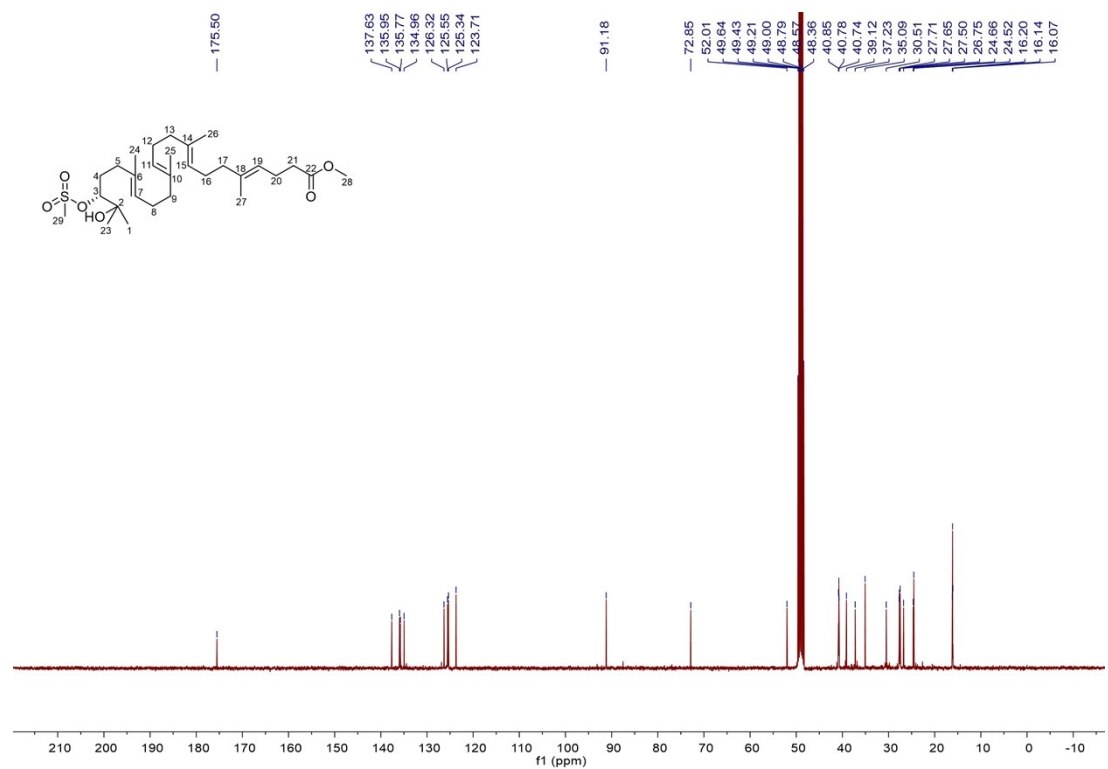

Figure S112. <sup>13</sup>C NMR spectrum of **10e** in methanol-*d*<sub>4</sub> (100 MHz).

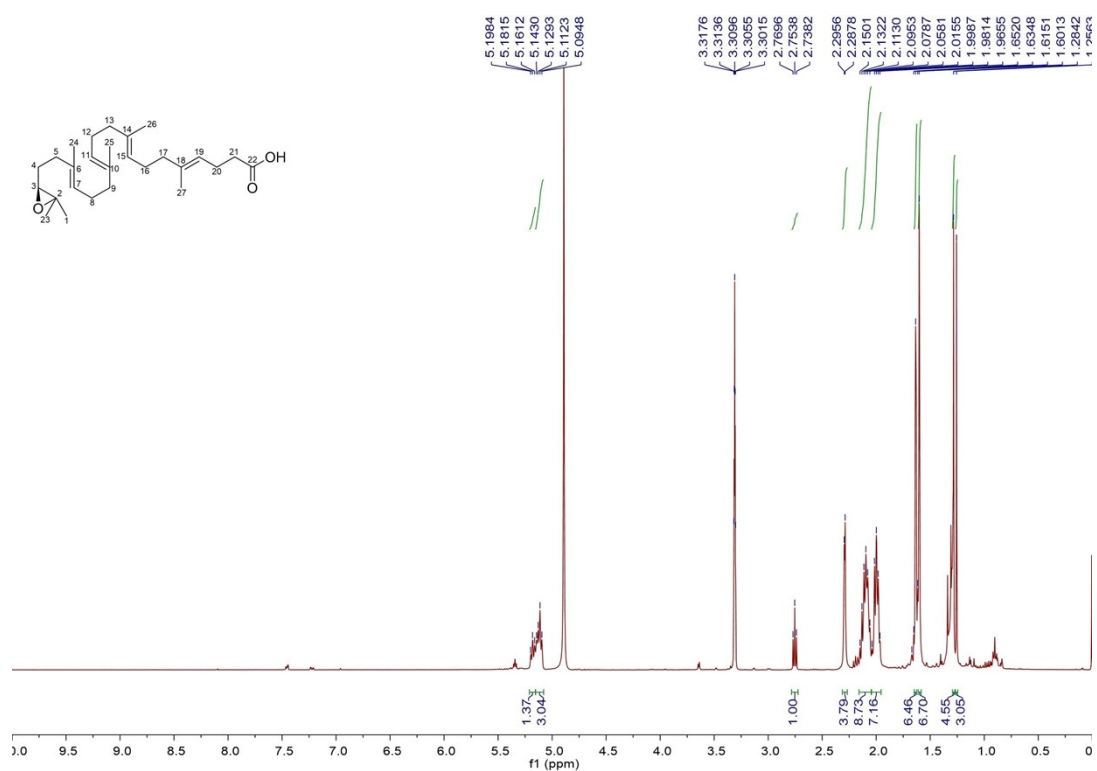

**Figure S113.**  $^1\text{H}$  NMR spectrum of **10a** in methanol- $d_4$  (400 MHz).

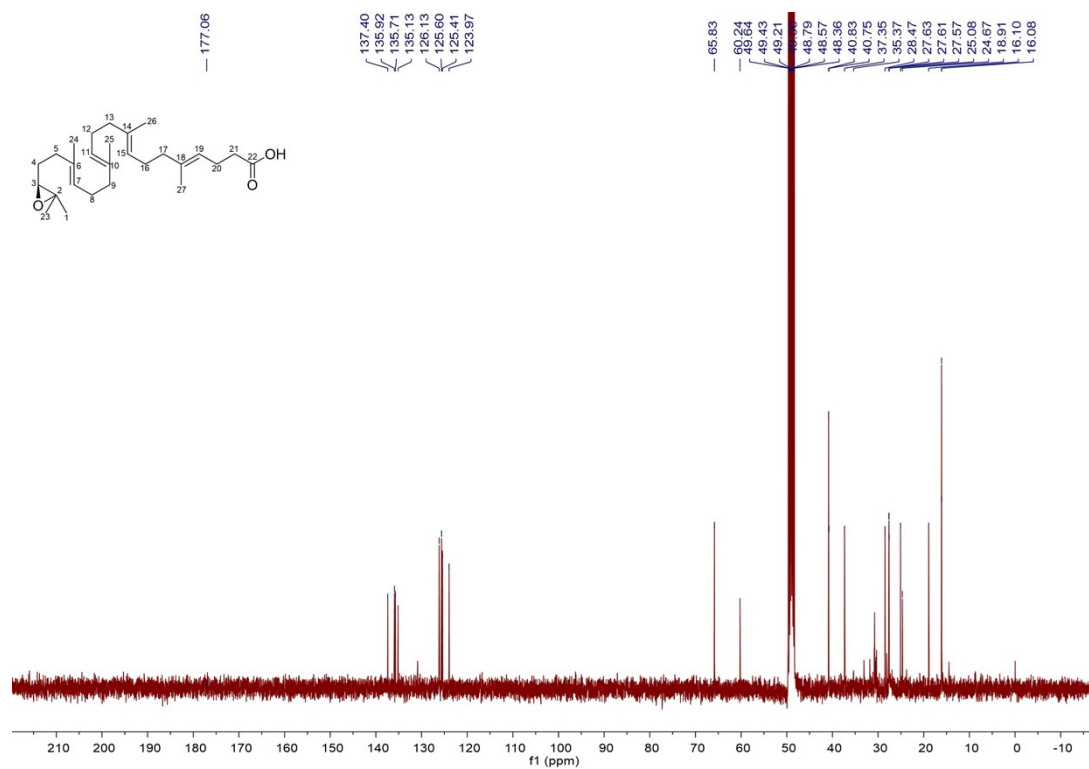

**Figure S114.**  $^{13}\text{C}$  NMR spectrum of **10a** in methanol- $d_4$  (100 MHz).



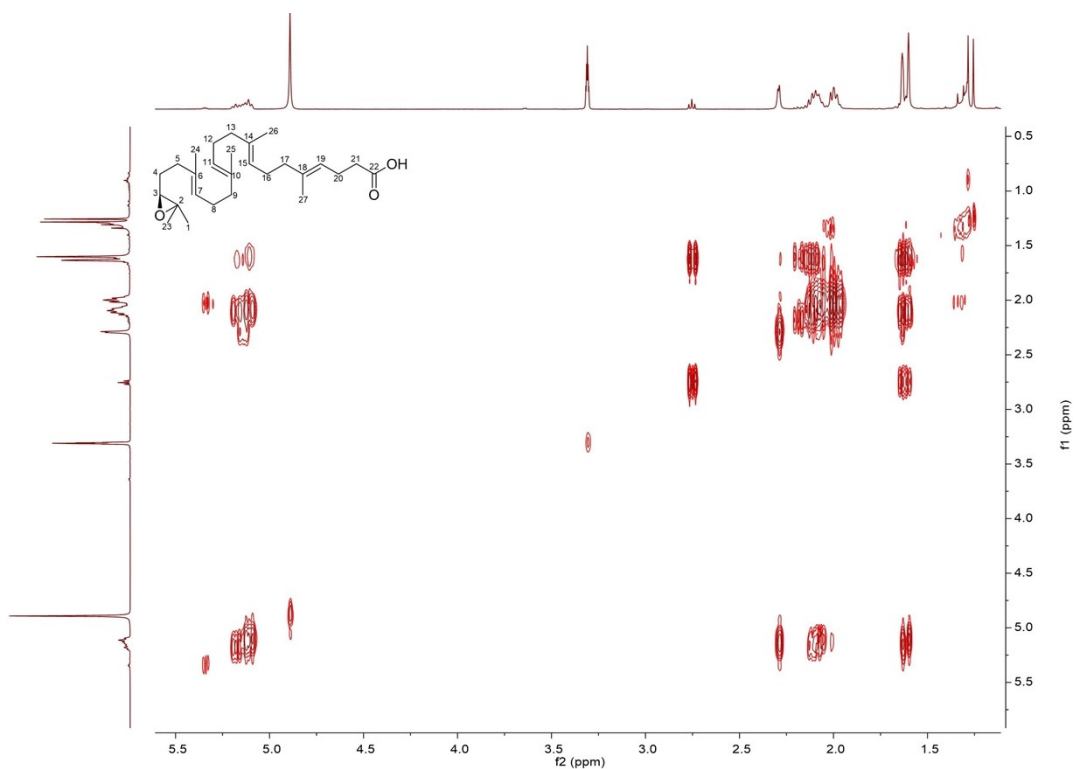

Figure S115.  $^1\text{H}$ - $^1\text{H}$  COSY spectrum of **10a** in methanol- $d_4$ .

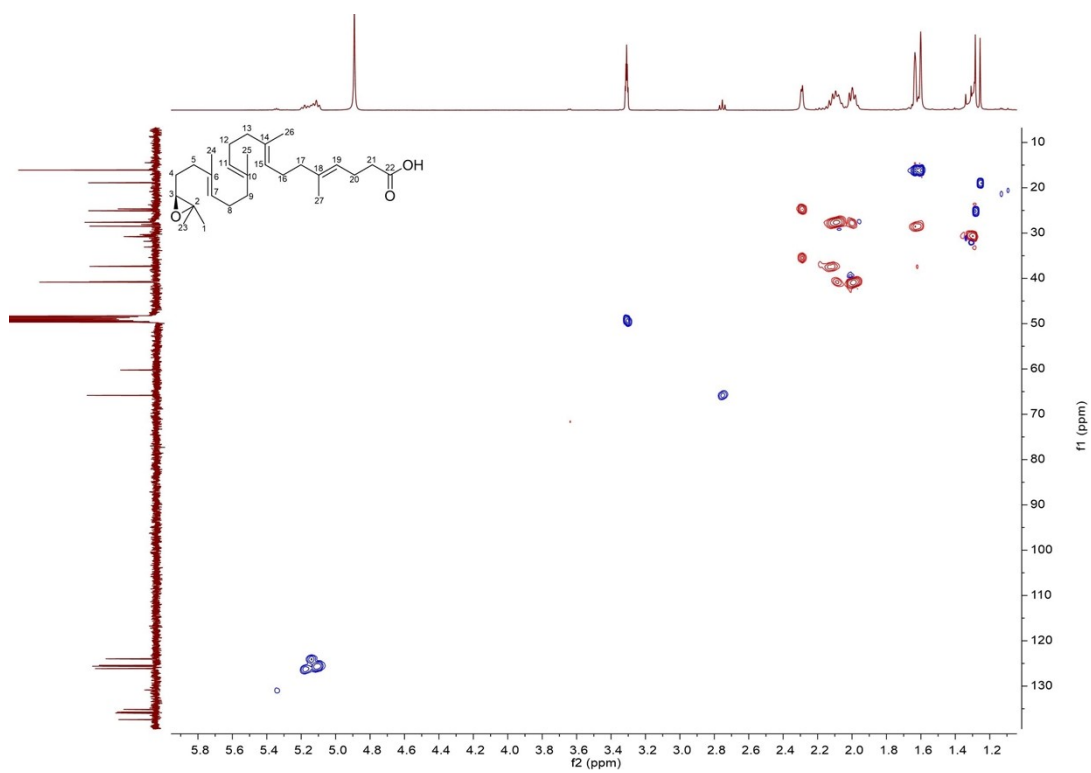

Figure S116. HSQC spectrum of **10a** in methanol- $d_4$ .

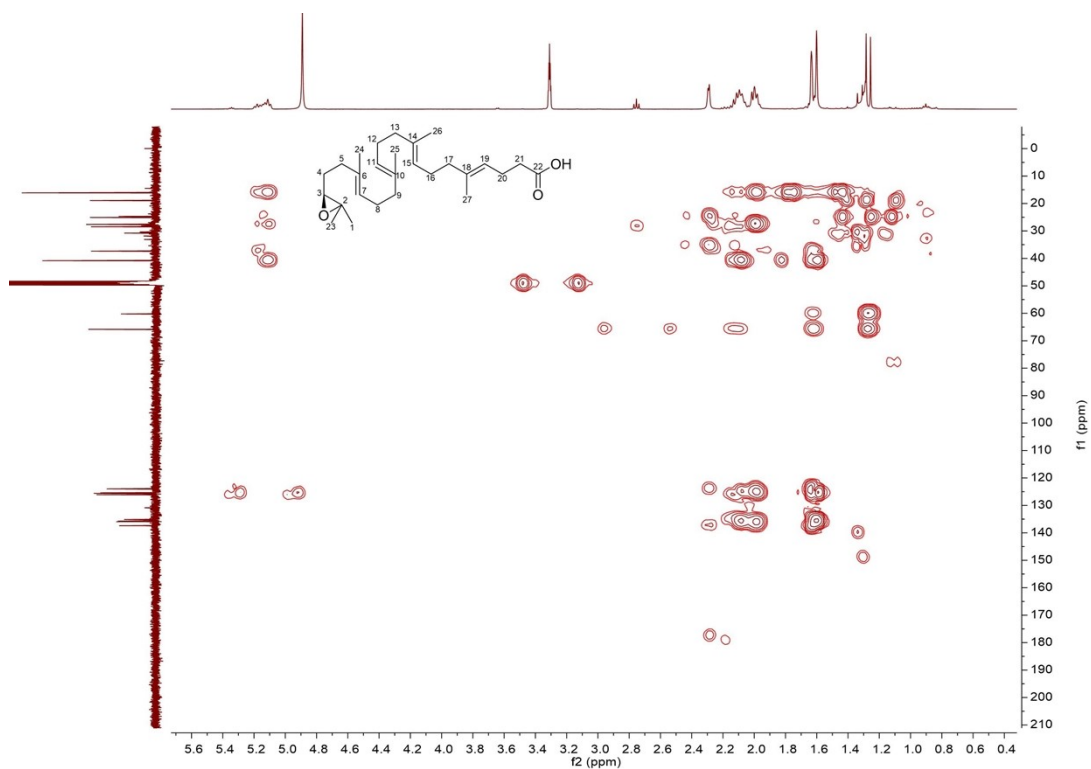

Figure S117. HMBC spectrum of **10a** in methanol- $d_4$ .

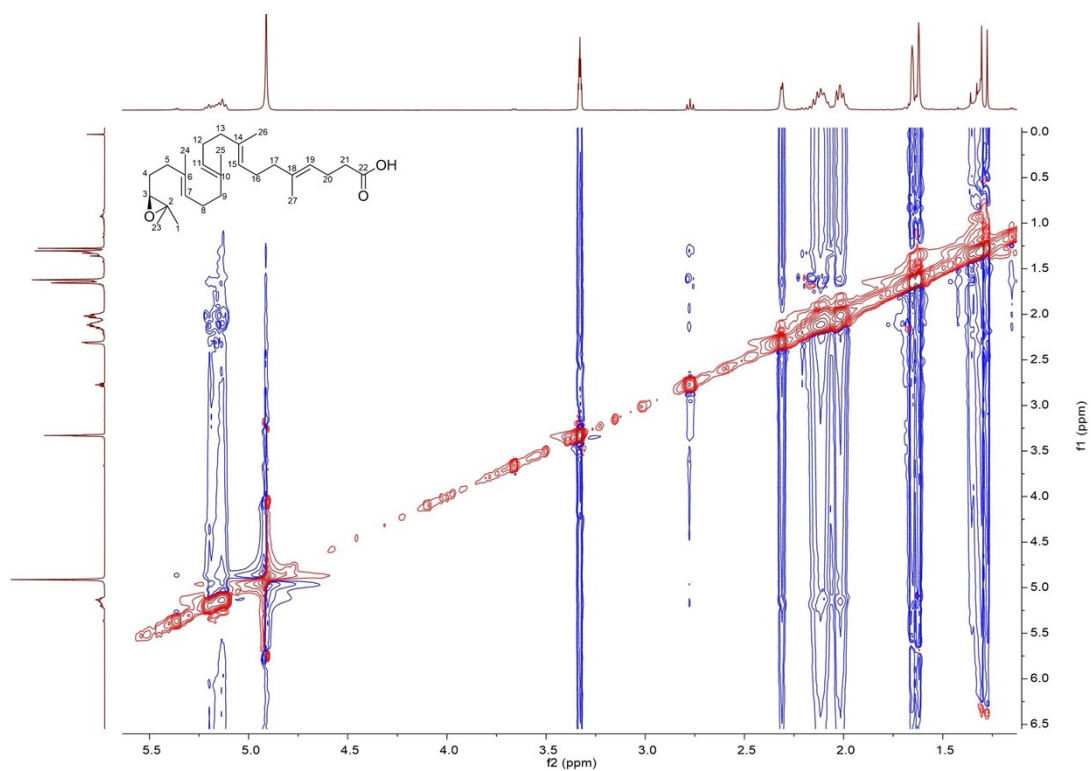

Figure S118. ROESY spectrum of **10a** in methanol- $d_4$ .

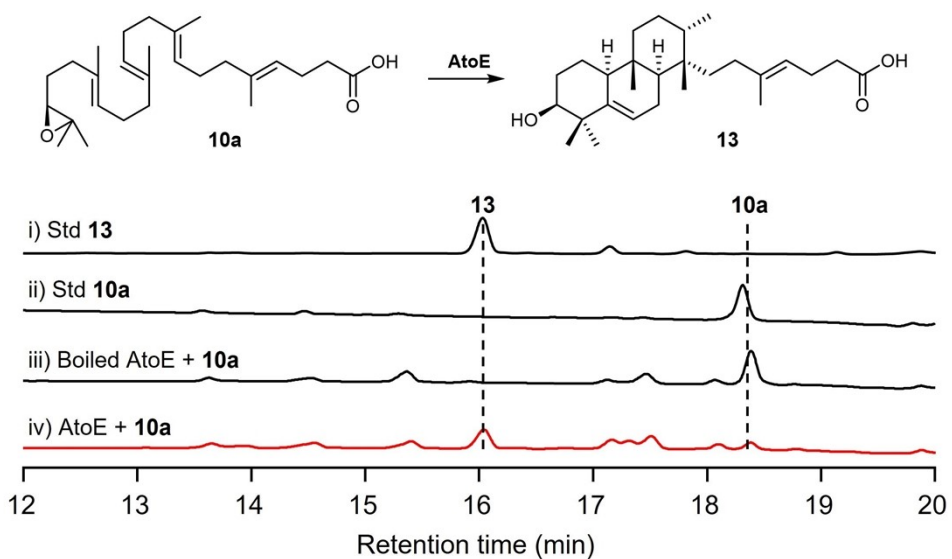

**Figure S119.** HPLC analysis of in vitro biochemical assay of AtoE with **10a** ( $\lambda_{\text{max}} = 210 \text{ nm}$ ).

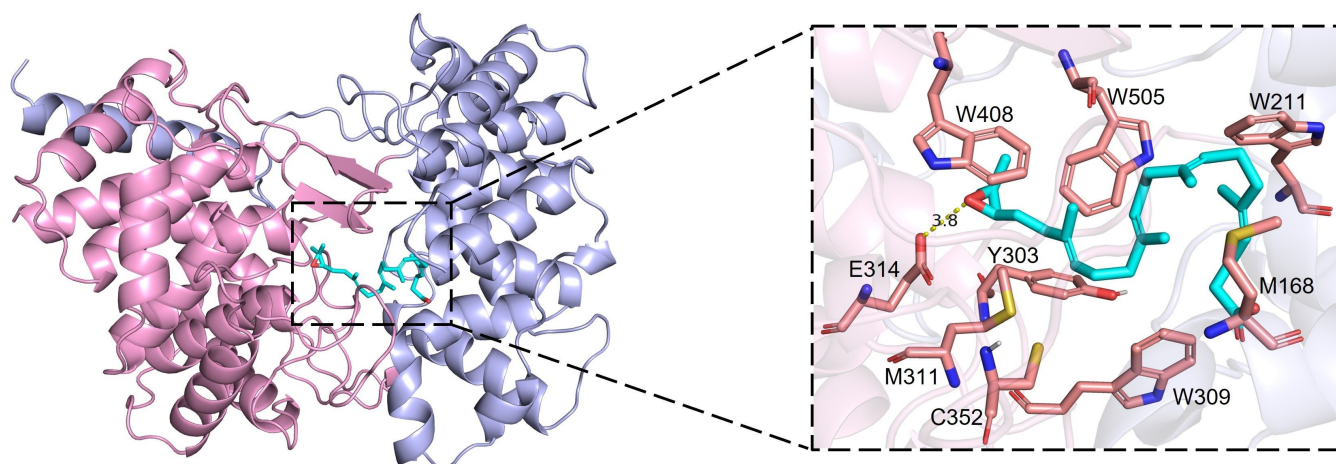

**Figure S120.** Structural model of AtoE with displaying key active site residues and a docking model of **10a**.

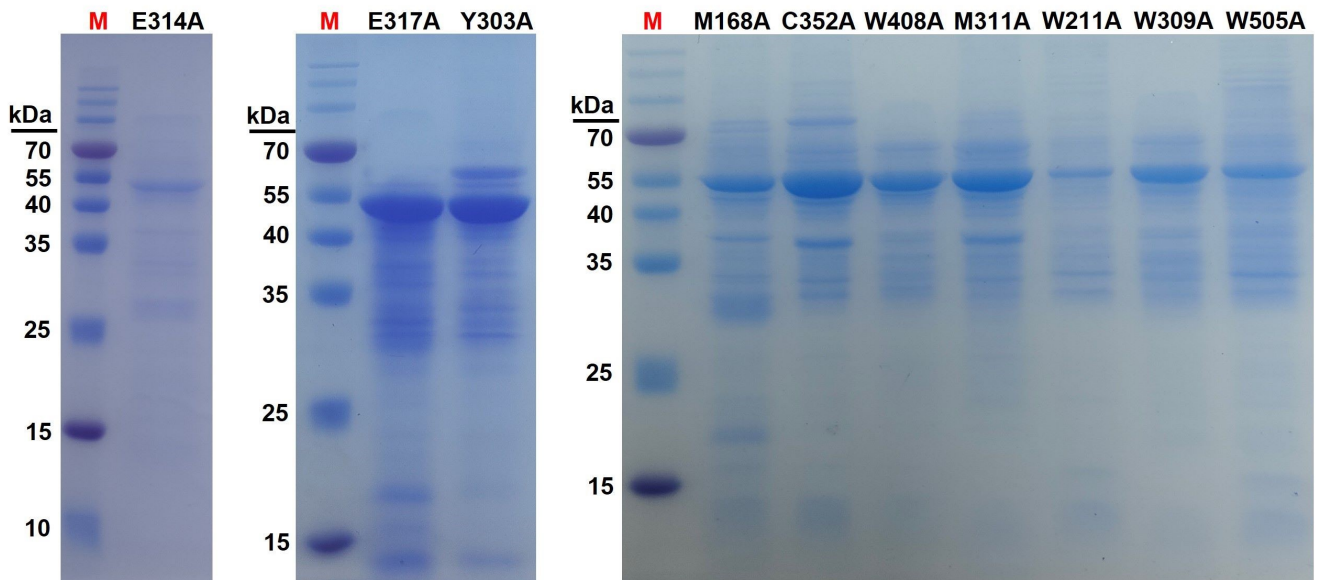

**Figure S121.** Protein purification of AtoE mutants. Each AtoE mutant was fermented in 4L cultures, and the resultant proteins were purified, yielding E314A, E317A, Y303A, M168A, C352A, W408A, M311A, W211A, W309A, and W505A. Lane M, Prestained Color Protein Ladder (Beyotime).

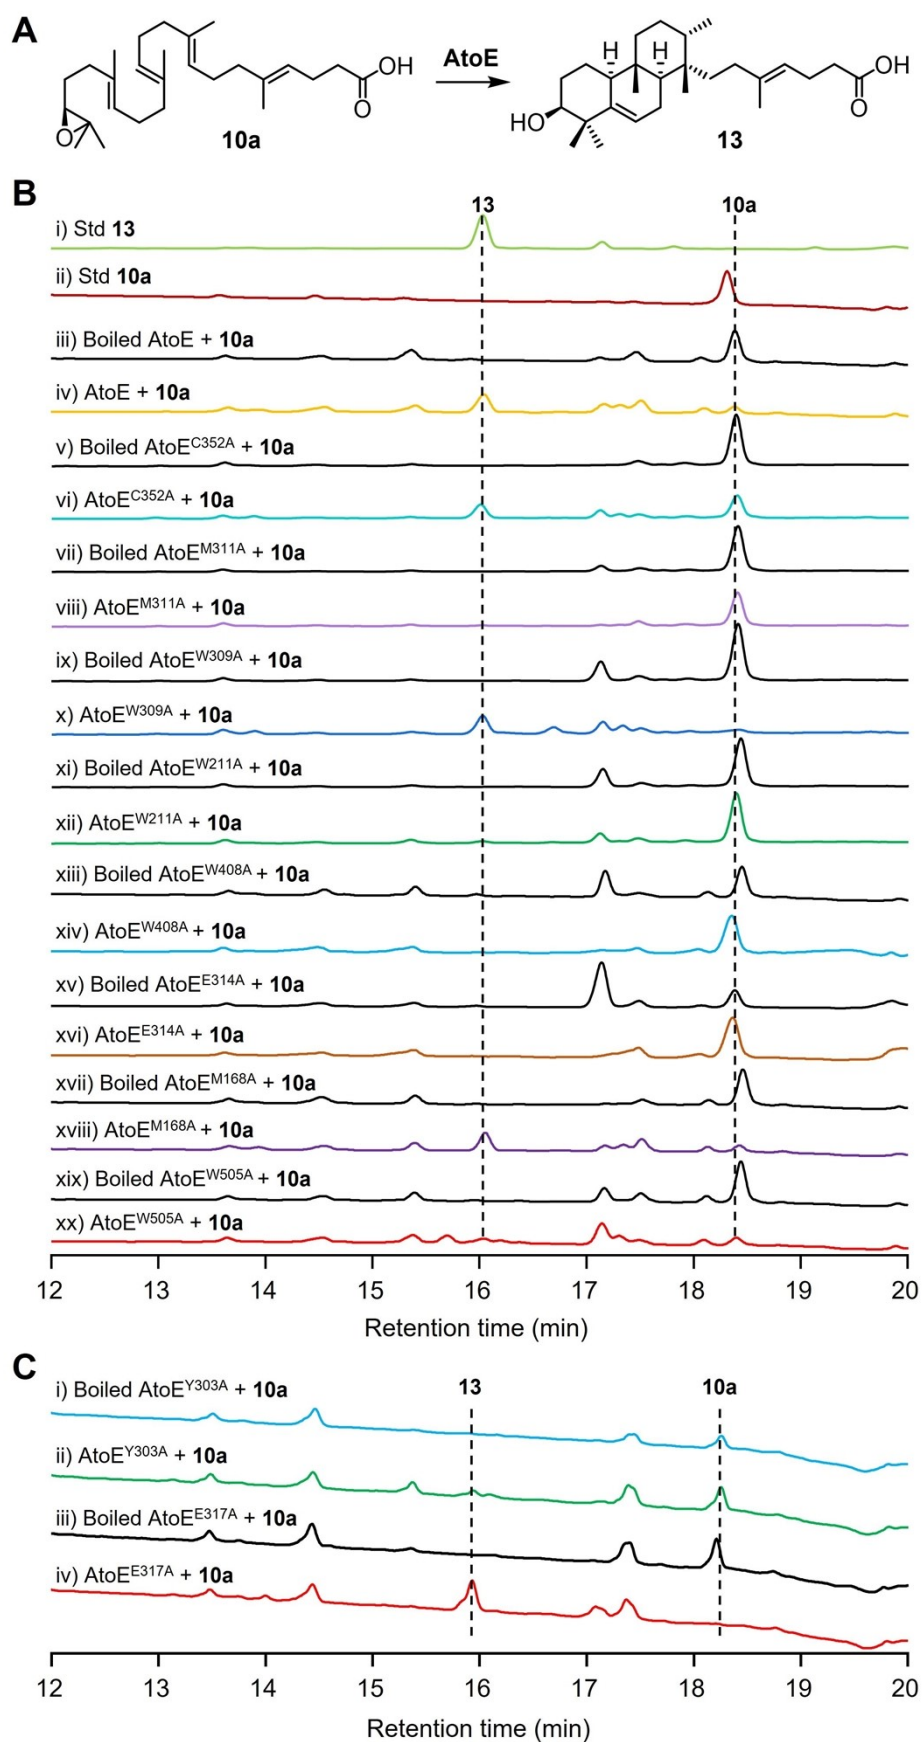

**Figure S122.** In vitro reactions of AtoE variants with the substrate **10a**. A) Cyclization of **10a** by MTC AtoE catalyzes the formation of **13**; B) HPLC profiles ( $\lambda_{\text{max}} = 210 \text{ nm}$ ) of the in vitro reactions of AtoE and its variants (C352A, M311A, W309A, W211A, W408A, E314A, M168A, and W505A) with the substrate **10a**; C) HPLC analysis of the in vitro reactions of variants (Y303A and E317A) with the substrate **10a**.

EIC [M-H]<sup>-</sup>: -m/z 415 (for 13), -m/z 415 (for 10a), -m/z 415 (unidentified)

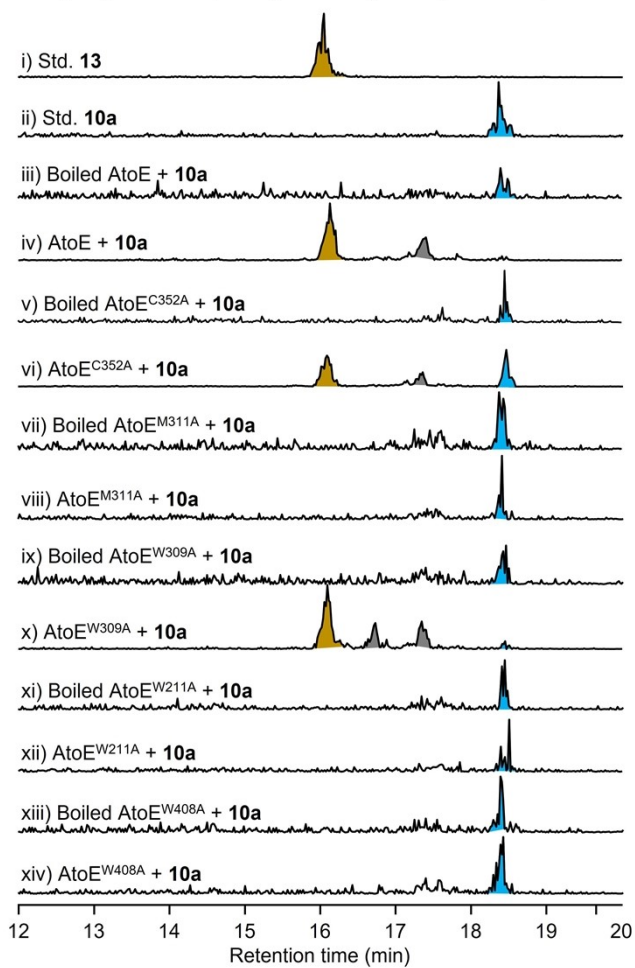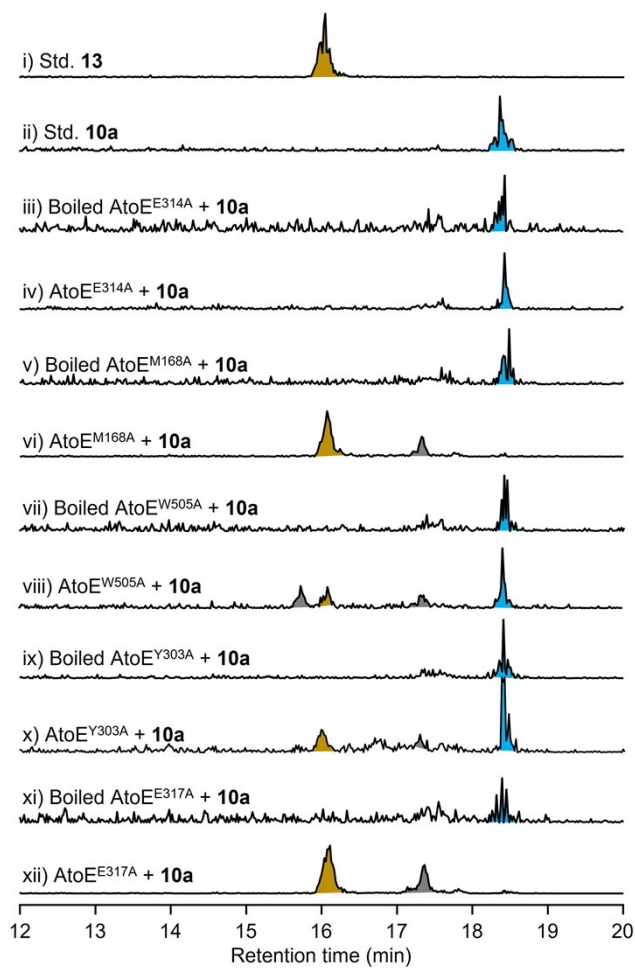

Figure S123. LC-MS analysis of the in vitro reactions of AtoE and variants with 10a.



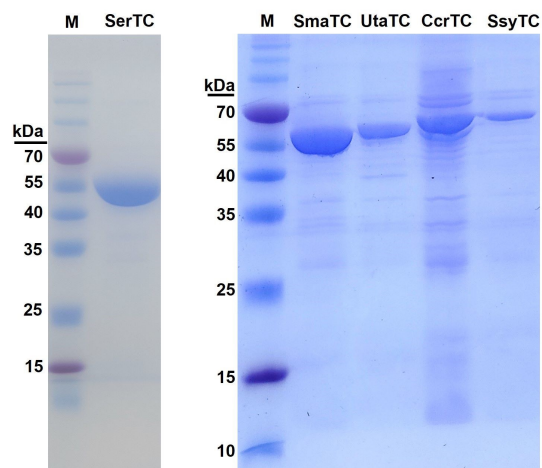

**Figure S124.** Protein purification of selected class II MTCs. M, Prestained Protein Marker (Vazyme); Purified N-His<sub>6</sub>-tagged SerTC (572 amino acids, ~61.3 KDa); Purified N-His<sub>6</sub>-tagged SmaTC (600 amino acids, ~63.7 KDa); Purified N-His<sub>6</sub>-tagged UtaTC (588 amino acids, ~63.6 KDa); Purified N-His<sub>6</sub>-tagged CcrTC (589 amino acids, ~65.3 KDa); Purified N-His<sub>6</sub>-tagged SsyTC (585 amino acids, ~61.0 KDa). SerTC (Uniprot ID: A4FIP2); SmaTC (Uniprot ID: A0A515GD19); UtaTC (Uniprot ID: A0A2T0STH2); CcrTC (Uniprot ID: A0A7W7FUZ7); SsyTC (Uniprot ID: A0A5Q0H4Q7).



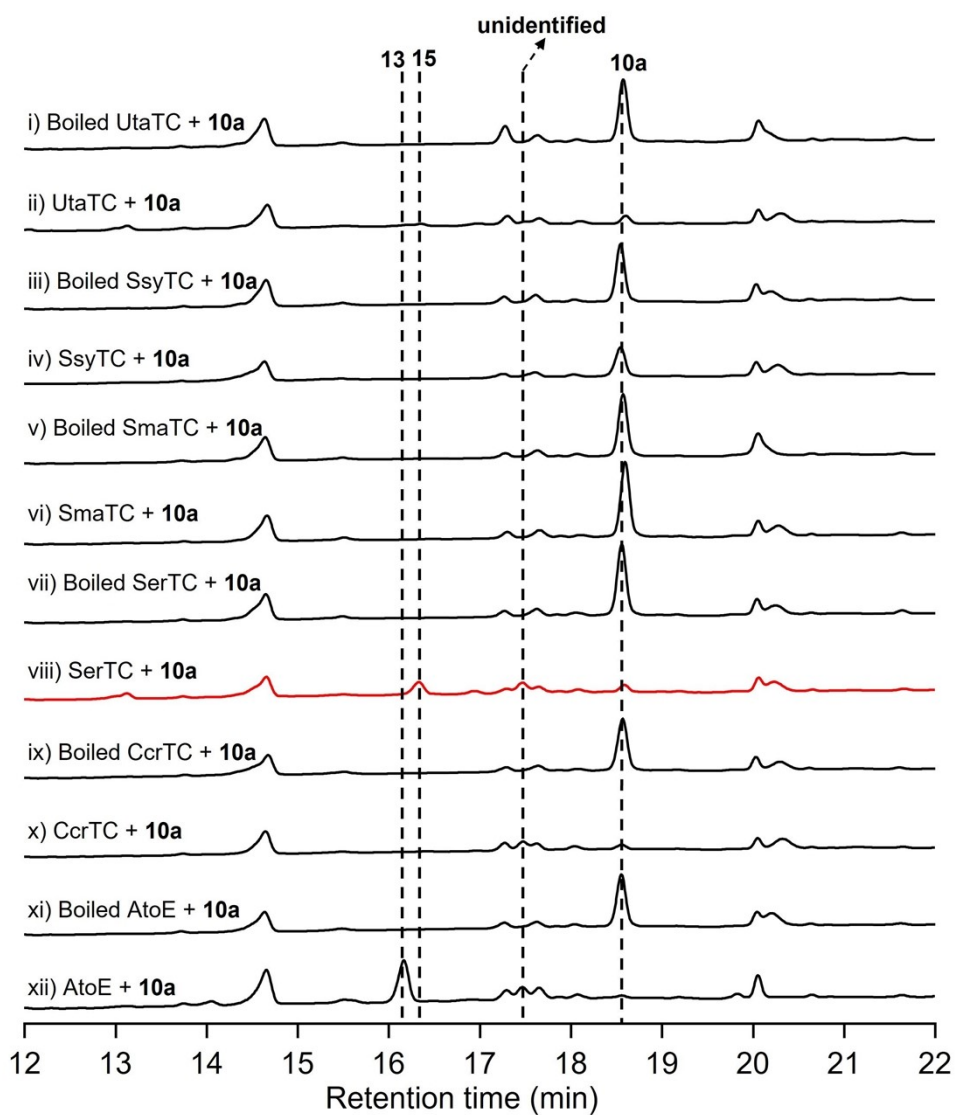

**Figure S125.** HPLC profiles ( $\lambda_{\text{max}} = 210 \text{ nm}$ ) of the in vitro reactions of class II MTCs (UtaTC, SsyTC, SmaTC, SerTC, CcrTC, and AtoE) with **10a**.

EIC [M-H]<sup>-</sup>: -*m/z* 415 (for **13**), -*m/z* 415 (for **15**), -*m/z* 415 (for **10a**),  
-*m/z* 415 (unidentified)

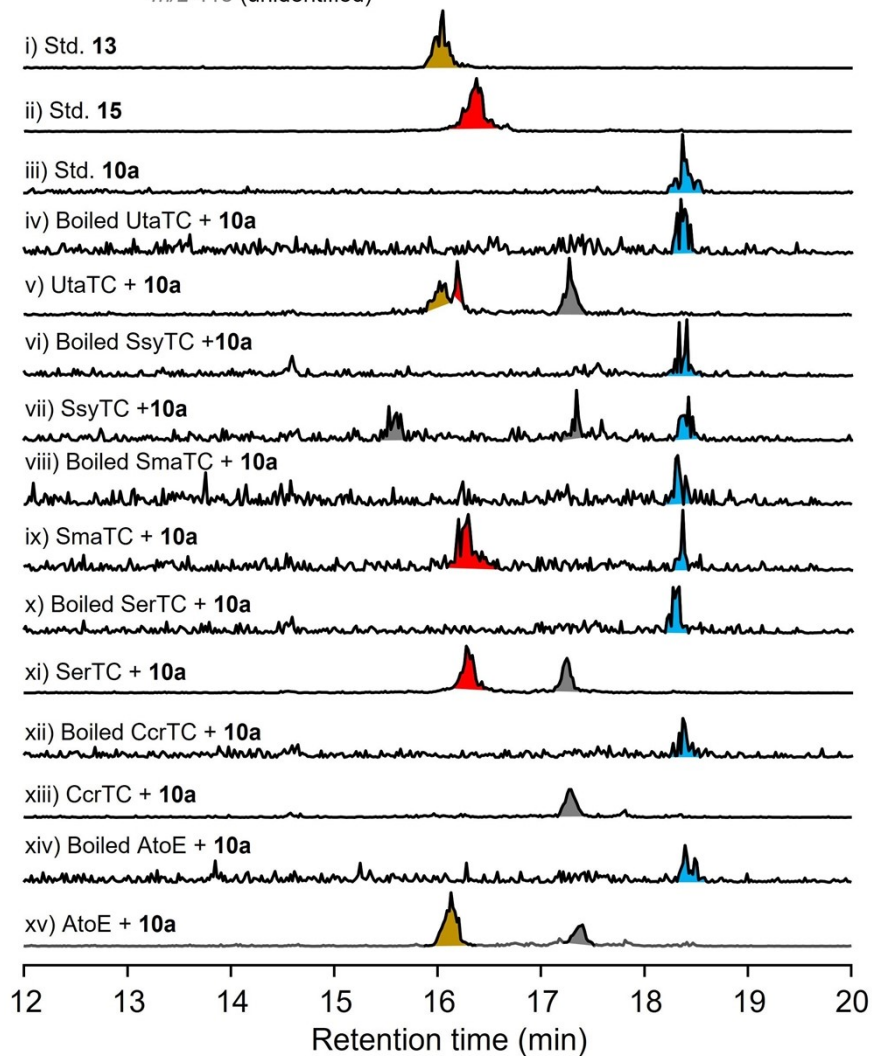

**Figure S126.** LC-MS analysis of the in vitro reactions of class II MTCs (UtaTC, SsyTC, SmaTC, SerTC, CcrTC and AtoE) with **10a**.

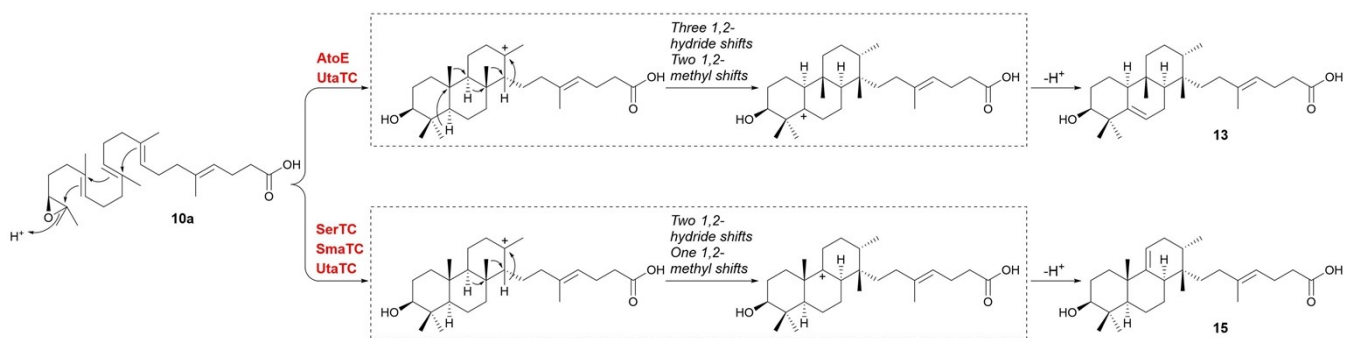

**Figure S127.** Proposed catalytic processes of the class II MTCs involving substrate **10a** to form **13** and **15**.

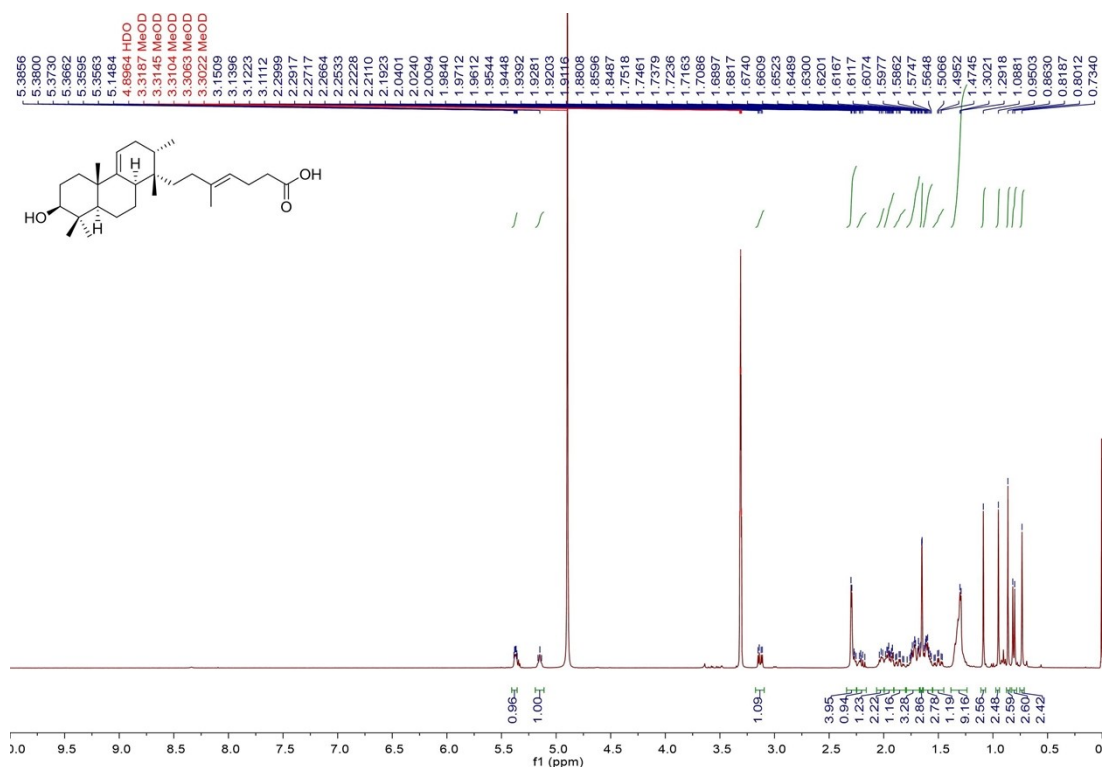

Figure S128. <sup>1</sup>H NMR spectrum of atolypene H (15) in methanol-d<sub>4</sub> (400 MHz).

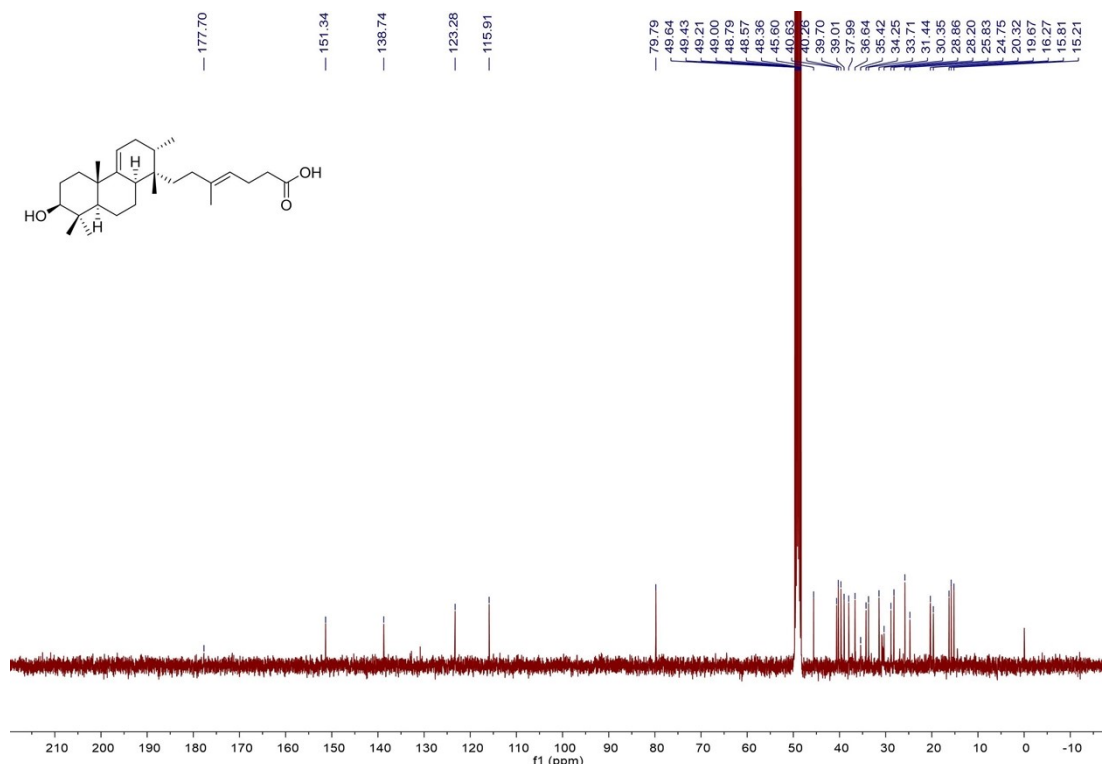

Figure S129. <sup>13</sup>C NMR spectrum of atolypene H (15) in methanol-d<sub>4</sub> (100 MHz).

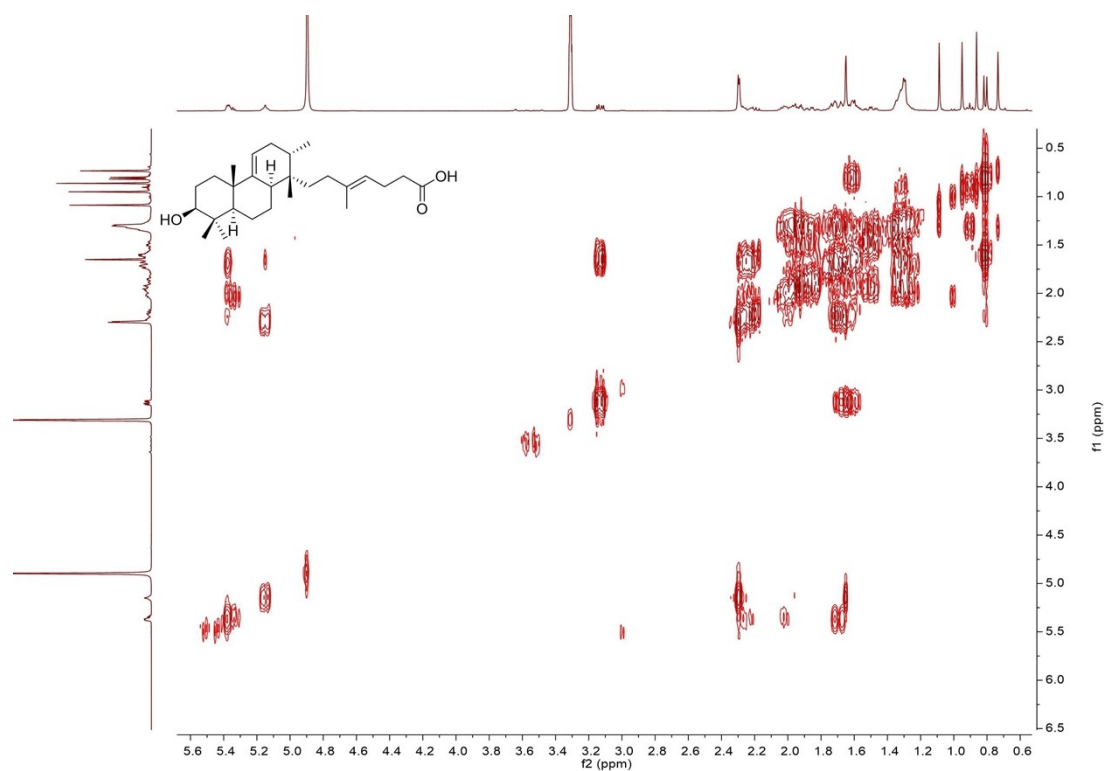

Figure S130.  $^1\text{H}$ - $^1\text{H}$  COSY spectrum of atylpene H (**15**) in methanol- $d_4$ .

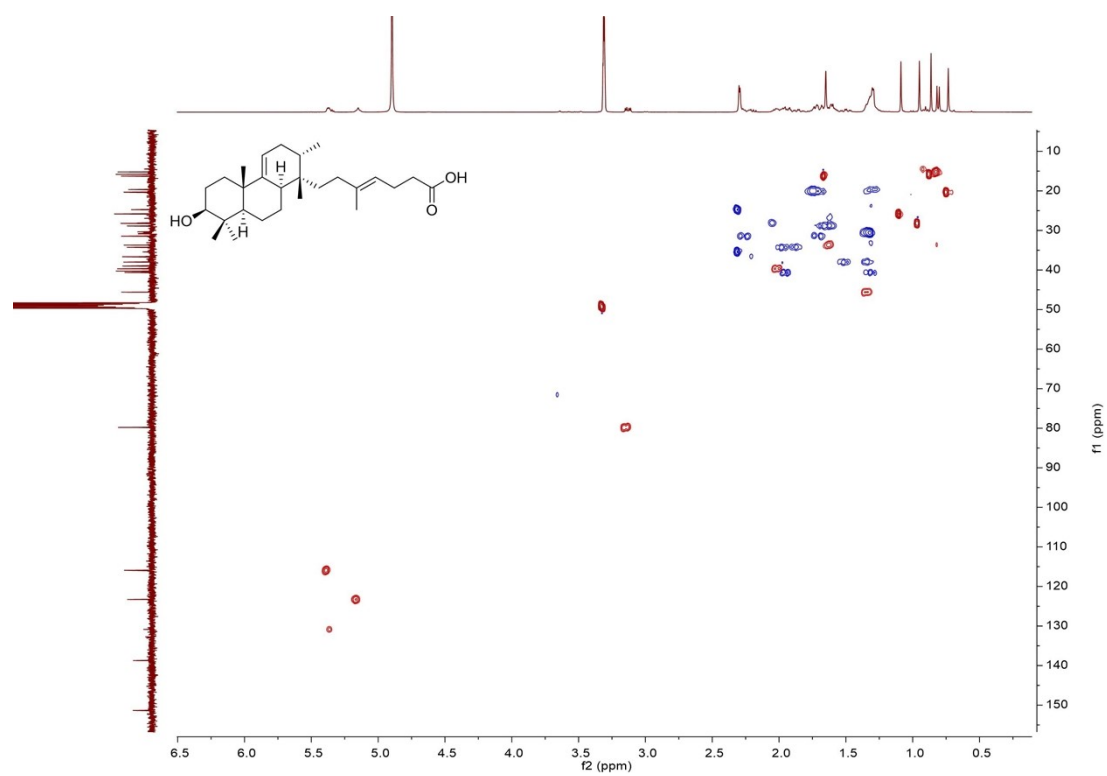

Figure S131. HSQC spectrum of atylpene H (**15**) in methanol- $d_4$ .

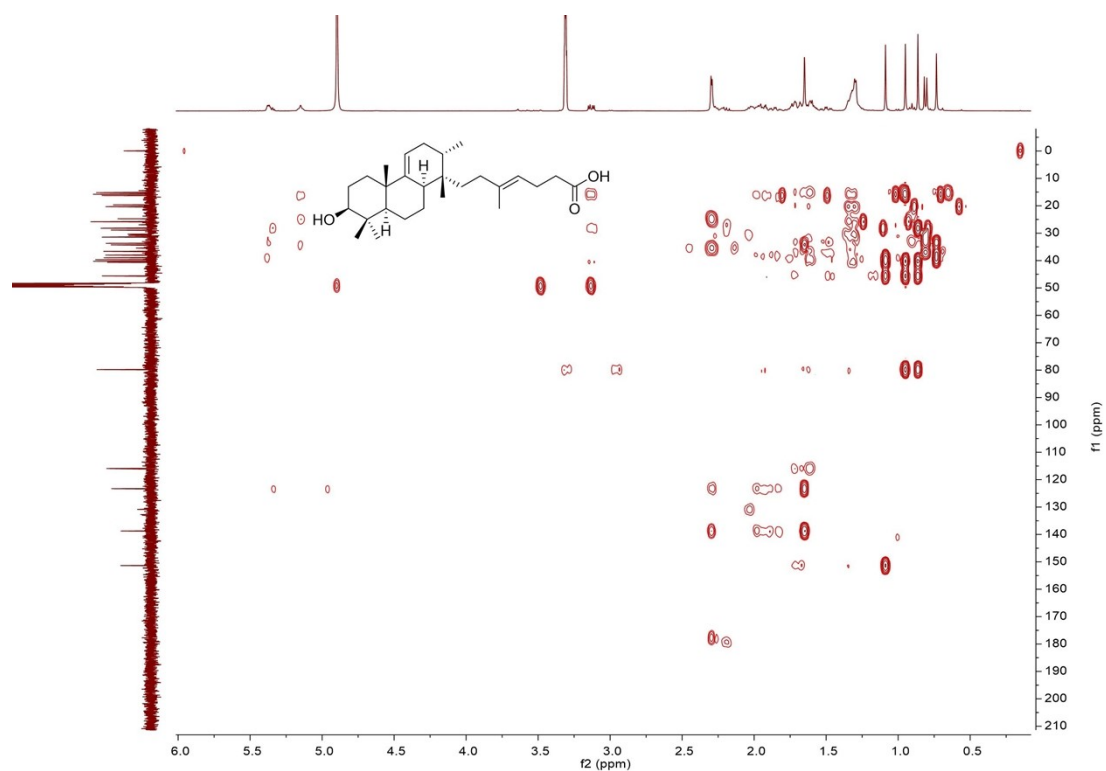

Figure S132. HMBC spectrum of atolypene H (**15**) in methanol- $d_4$ .

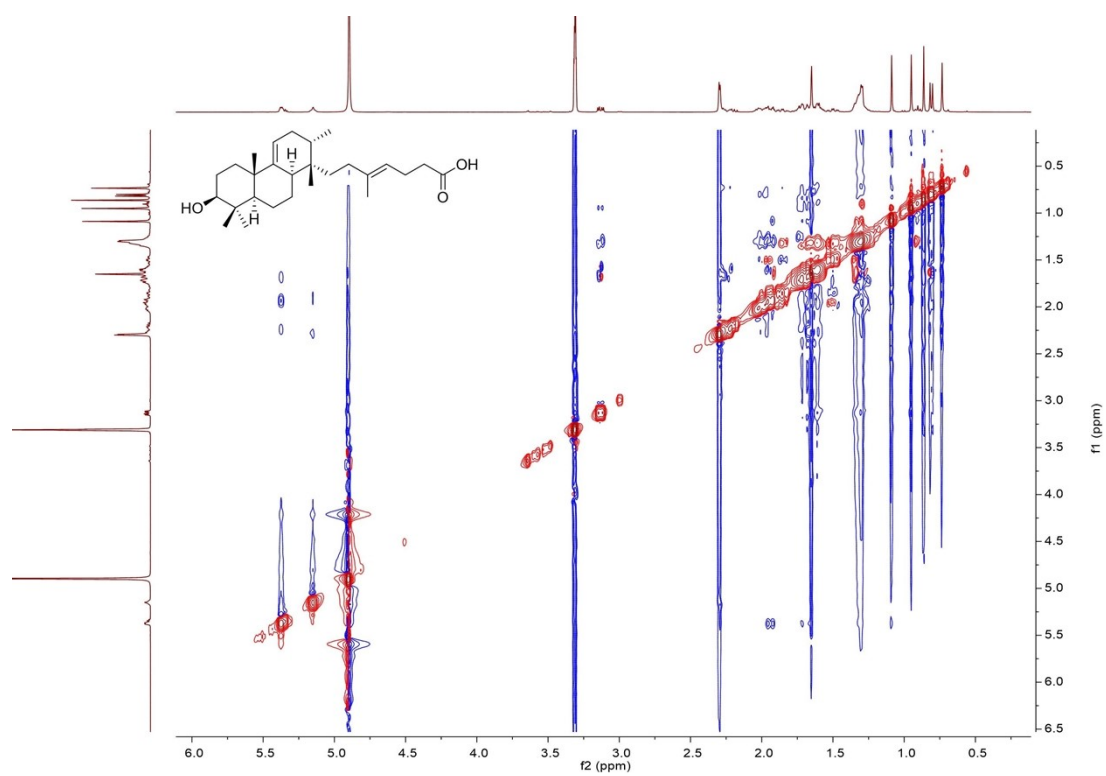

Figure S133. ROESY spectrum of atolypene H (**15**) in methanol- $d_4$ .

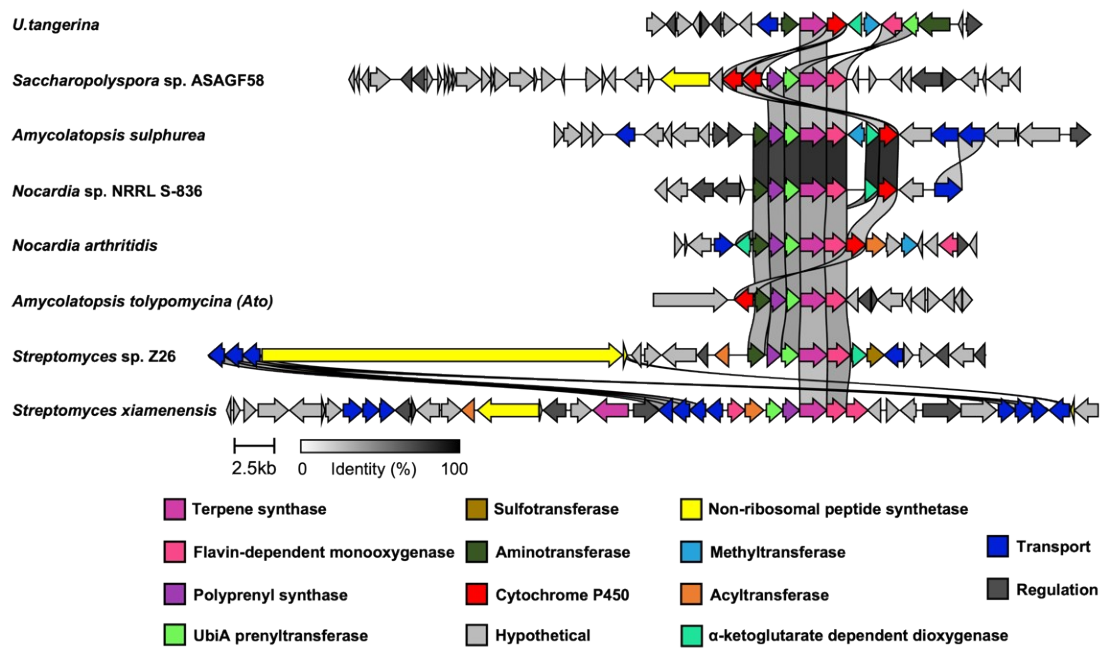

**Figure S134.** Analysis of selected *ato*-like BGCs. Links are drawn between genes if they share at least 30% identity. Genes are colored based on putative function.

## References

- [1] L.-B. Dong, X. Zhang, J. D. Rudolf, M.-R. Deng, E. Kalkreuter, A. J. Cepeda, H. Renata and B. Shen, *J. Am. Chem. Soc.*, 2019, **141**, 4043–4050.
- [2] L.-B. Dong, J. D. Rudolf, D. Kang, N. Wang, C. Q. He, Y. Deng, Y. Huang, K. N. Houk, Y. Duan and B. Shen, *Nat. Commun.*, 2018, **9**, 2362.
- [3] L.-B. Dong, J. D. Rudolf, M.-R. Deng, X. Yan and B. Shen, *ChemBioChem*, 2018, **19**, 1727–1733.
- [4] S. Y. Hsu, D. Perusse, T. Hougard and M. J. Smanski, *ACS Synth. Biol.*, 2019, **8**, 2397–2403.
- [5] P. Mazodier, R. Petter and C. Thompson, *J. Bacteriol.*, 1989, **171**, 3583–3585.
- [6] L.-B. Dong, J. He, Y.-Y. Wang, X.-D. Wu, X. Deng, Z.-H. Pan, G. Xu, L.-Y. Peng, Y. Zhao, Y. Li, X. Gong and Q.-S. Zhao, *J. Nat. Prod.*, 2011, **74**, 234–239.
- [7] X. T. Liang, J. H. Chen and Z. Yang, *J. Am. Chem. Soc.*, 2020, **142**, 8116–8121.
- [8] E.J. Corey, M. C. Noe and W.-C. Shieh, *Tetrahedron Lett.*, 1993, **34**, 5995–5998.
- [9] S. Kumar, G. Stecher, M. Li, C. Knyaz and K. Tamura, *Mol. Biol. Evol.*, 2018, **35**, 1547–1549.
- [10] I. Letunic and P. Bork, *Nucleic Acids Res.*, 2021, **49**, 293–296.
- [11] R. Zallot, N. Oberg and J. A. Gerlt, *Biochemistry*, 2019, **58**, 4169–4182.
- [12] C. L. M. Gilchrist and Y.-H. Chooi, *Bioinformatics*, 2021, **37**, 2473–2475.
- [13] M. S. Paget, L. Chamberlin, A. Atrih, S. J. Foster and M. J. Buttner, *J. Bacteriol.*, 1999, **181**, 204–211.
- [14] S.-H. Kim, W. Lu, M. K. Ahmadi, D. Montiel, M. A. Ternei and S. F. Brady, *ACS Synth. Biol.*, 2019, **8**, 109–118.
- [15] S. C. Chang, W. C. Yang and Y. H. Lee, *Biochim. Biophys. Acta.*, 1992, **1129**, 219–222.
- [16] J. P. Gomez-Escribano and M. J. Bibb, *Methods Enzymol.* 2012, **517**, 279–300.
- [17] M. Bierman, R. Logan, K. O'Brien, E. T. Seno, R. N. Rao and B. E. Schoner, *Gene*, 1992, **116**, 43–49.
- [18] J. D. Rudolf, L.-B. Dong, T. Huang and B. Shen, *Mol. Biosyst.*, 2015, **11**, 2717–2726.
- [19] T. Itoh, K. Tokunaga, Y. Matsuda, I. Fujii, I. Abe, Y. Ebizuka and T. Kushiro, *Nat. Chem.*, 2010, **2**, 858–864.
- [20] Y. Hayashi, N. Matsuura, H. Toshima, N. Itoh, J. Ishikawa, Y. Mikami and T. Dairi, *J. Antibiot.*, 2008, **61**, 164–174.
- [21] C. Dürr, H. J. Schnell, A. Luzhetskyy, R. Murillo, M. Weber, K. Welzel, A. Vente and A. Bechthold, *Chem. Biol.*, 2006, **13**, 365–377.
- [22] T. A. Alsup, Z. Li, C. A. McCadden, A. Jagels, D. Łomowska-Keehner, E. Marshall, L.-B. Dong, S. Loesgen and J. D. Rudolf, *RSC Chem. Biol.*, 2024, **5**, 1010-1016.
- [22] Y. Hayashi, H. Onaka, N. Itoh, H. Seto and T. Dairi, *Biosci. Biotech. Bioch.*, 2007, **71**, 3072–3081.
